# Supplementary material for: Dearomative 1,6-addition of P(O)–H to in situ formed p-QM-like ion pairs from 2-benzofuryl-ols to C3-phosphinoyl hydrobenzofurans
Source: Royal Society of Chemistry journal article supplement (doi:10.1039/d1qo00076d), 2021-01-01

# Dearomative 1,6-addition of P(O)-H to *in situ* Formed *p*-QMs-like Ion Pair from 2-Benzofuryl-ols to C3-Phosphinoyl Hydrobenzofurans

Long Chen<sup>\*a</sup>, Yun-Xiang Zou,<sup>a</sup> Shi-Lu Zheng,<sup>a</sup> Xiao-Yan Liu,<sup>a</sup> Hong-Li Yang,<sup>a</sup> Jing Zhang,<sup>a</sup> Yao Zeng,<sup>a</sup> Li Duan<sup>a</sup>, Zhong Wen<sup>a</sup> and Hai-Liang Ni<sup>\*b</sup>

<sup>†</sup> Antibiotics Research and Re-evaluation Key Laboratory of Sichuan Province, Sichuan Industrial Institute of Antibiotics, School of Pharmacy, Chengdu University, 2025 Chengluo Avenue, Chengdu 610016, P. R. China, Email: [chenlong@cdu.edu.cn](mailto:chenlong@cdu.edu.cn)

<sup>‡</sup> College of Chemistry and Materials Science, Sichuan Normal University, 5 Jing An Road, Chengdu 610066, P. R. China

| Table of Contents                                                                         | page   |
|-------------------------------------------------------------------------------------------|--------|
| 1. General information                                                                    | 2      |
| 2. Condition optimization                                                                 | 3      |
| 3. General procedure for dearomative C3-phosphorylation of 2-benzofuran-ols and analogues | 4-17   |
| 4. General procedure for tandem dearomative C3-phosphorylation/aromatization              | 18-22  |
| 5. Gram-scale synthesis and product elaboration                                           | 23-25  |
| 6. Asymmetric feasibility of this dearomative C3-phosphorylation of 2-benzofuran-ol       | 26     |
| 7. X-ray Crystallographic Data of 4aa                                                     | 27-33  |
| 8. <sup>1</sup> H, <sup>13</sup> C, <sup>19</sup> F and <sup>31</sup> P NMR spectra       | 34-183 |

## 1. General information:

Reactions were monitored by thin layer chromatography using UV light to visualize the reaction course. Purification of reaction products were carried out by flash chromatography on silica gel. Chemical yields refer to pure isolated substances.  $^1\text{H}$  and  $^{13}\text{C}$  NMR spectra were obtained using a Bruker DPX-400 or JEOL-600 spectrometer. The  $^{31}\text{P}$  NMR spectra were recorded at JEOL 243 MHz with 85%  $\text{H}_3\text{PO}_4$  as external standard. The  $^{19}\text{F}$  NMR spectra were recorded at JEOL 565 MHz. Chemical shifts are reported in ppm from tetramethylsilane with the solvent resonance as the internal standard. The following abbreviations were used to designate chemical shift multiplicities: s = singlet, d = doublet, t = triplet, q = quartet, h = heptet, m = multiplet, br = broad.

All reactions were run under an atmosphere of air. Anhydrous THF and toluene were prepared by distillation over sodium-benzophenone ketyl prior to use. Anhydrous halogenated solvents and  $\text{CH}_3\text{CN}$  were prepared by first distillation over  $\text{P}_2\text{O}_5$  and then from  $\text{CaH}_2$ . Anhydrous ethyl acetate was prepared by first dried in anhydrous  $\text{Na}_2\text{SO}_4$  and then distilled over  $\text{P}_2\text{O}_5$  and stored over MS 4Å. Anhydrous  $\text{CH}_3\text{NO}_2$  was prepared by first dried in anhydrous  $\text{Na}_2\text{SO}_4$  and then distilled under reduced pressure. Anhydrous  $\text{ClCH}_2\text{CH}_2\text{Cl}$  was prepared by dried in anhydrous  $\text{Na}_2\text{SO}_4$ . 2-Benzofuryl-ols<sup>1a-c</sup>, 2-benzothioenyl-ols<sup>1e</sup>, 2-indolylmethols<sup>1f</sup> and disubstituted phosphine oxides **2**<sup>2</sup> were prepared according to the literature report.  $\text{Bi}(\text{OTf})_3$  (99.998%) was purchased from Alfa-Aesar and used as received.

---

<sup>1</sup> (a) Y. Zhou, X.-P. Xu, S.-J. Ji, *Org. Lett.*, 2019, **21**, 2039; (b) W. Chen, Z.-H. Zhou, H.-B. Chen, *Org. Biomol. Chem.*, 2017, **15**, 1530; (c) G. Kumaraswamy, G. Ramakrishna, R. Raju, M. Padmaja, *Tetrahedron*, 2010, **66**, 9814; (d) S. Dhiman, S. V. V. Ramasastry, *Org. Biomol. Chem.*, 2013, **11**, 4299; (e) A. B. Biró, A. Kotschy, *Eur. J. Org. Chem.*, 2007, 1364; (f) Y.-Y. He, X.-X. Sun, G.-H. Li, G.-J. Mei, F. Shi, *J. Org. Chem.*, 2017, **82**, 2462

<sup>2</sup>S. Molitor, J. Becker, V. H. Gessner, *J. Am. Chem. Soc.*, 2014, **136**, 15517.

## 2. Condition optimization

**Table S1.** Reaction condition optimization

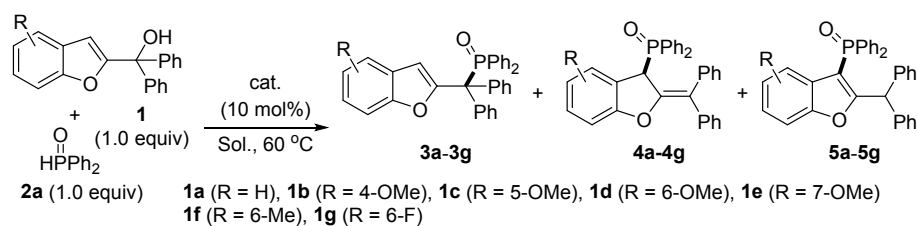

| Entry <sup>a</sup> | <b>1</b>  | Cat.                                                  | Solvent                         | Time/h | Yield[%] <sup>b</sup> |          |          | rr <sup>c</sup>   | Entry <sup>a</sup> | <b>1</b>             | Cat.                          | Solvent | Time/h | Yield[%] <sup>b</sup> |                    | rr <sup>c</sup> |
|--------------------|-----------|-------------------------------------------------------|---------------------------------|--------|-----------------------|----------|----------|-------------------|--------------------|----------------------|-------------------------------|---------|--------|-----------------------|--------------------|-----------------|
|                    |           |                                                       |                                 |        | <b>3</b>              | <b>4</b> | <b>3</b> |                   |                    |                      |                               |         |        | <b>4</b>              |                    |                 |
| 1                  | <b>1a</b> | TsOH:H <sub>2</sub> O                                 | DCE                             | 24     | 23                    | 49       | 1:2.1    | 20 <sup>d</sup>   | <b>1a</b>          | Bi(OTf) <sub>3</sub> | TFE                           | 3       | 43     | -                     | 1:1.2 <sup>e</sup> |                 |
| 2                  | <b>1a</b> | Tf <sub>2</sub> NH                                    | DCE                             | 1.0    | 34                    | 47       | 1:1.4    | 21                | <b>1a</b>          | Bi(OTf) <sub>3</sub> | Et <sub>2</sub> O             | 9       | 21     | 60                    | 1:2.9              |                 |
| 3                  | <b>1a</b> | Co(ClO <sub>4</sub> ) <sub>2</sub> ·6H <sub>2</sub> O | DCE                             | 8.0    | 31                    | 55       | 1:1.8    | 22                | <b>1a</b>          | Bi(OTf) <sub>3</sub> | toluene                       | 8       | 15     | 61                    | 1:4.1              |                 |
| 4                  | <b>1a</b> | Zn(ClO <sub>4</sub> ) <sub>2</sub> ·6H <sub>2</sub> O | DCE                             | 8.0    | 26                    | 45       | 1:1.7    | 23                | <b>1a</b>          | Bi(OTf) <sub>3</sub> | PhF                           | 5.0     | 16     | 52                    | 1:3.8              |                 |
| 5                  | <b>1a</b> | Ga(ClO <sub>4</sub> ) <sub>3</sub> ·6H <sub>2</sub> O | DCE                             | 7.0    | 31                    | 30       | 1:1      | 24                | <b>1a</b>          | Bi(OTf) <sub>3</sub> | C <sub>6</sub> F <sub>6</sub> | 24      | <10    | <10                   | -                  |                 |
| 6                  | <b>1a</b> | Mg(ClO <sub>4</sub> ) <sub>2</sub> ·6H <sub>2</sub> O | DCE                             | 8.0    | 29                    | 53       | 1:1.8    | 25                | <b>1a</b>          | Bi(OTf) <sub>3</sub> | PhCF <sub>3</sub>             | 5.5     | 20     | 60                    | 1:3.0              |                 |
| 7                  | <b>1a</b> | Mn(ClO <sub>4</sub> ) <sub>2</sub> ·6H <sub>2</sub> O | DCE                             | 8.0    | 29                    | 47       | 1:1.6    | 26 <sup>f</sup>   | <b>1a</b>          | Bi(OTf) <sub>3</sub> | toluene                       | 0.5     | 12     | 45                    | 1:3.8              |                 |
| 8                  | <b>1a</b> | Fe(ClO <sub>4</sub> ) <sub>3</sub> ·xH <sub>2</sub> O | DCE                             | 1.5    | 31                    | 48       | 1:1.5    | 27 <sup>g</sup>   | <b>1a</b>          | Bi(OTf) <sub>3</sub> | toluene                       | 2.5     | 14     | 60                    | 1:4.4              |                 |
| 9                  | <b>1a</b> | Ga(OTf) <sub>3</sub>                                  | DCE                             | 8      | 26                    | 47       | 1:1.8    | 28 <sup>h</sup>   | <b>1a</b>          | Bi(OTf) <sub>3</sub> | toluene                       | 2.5     | 14     | 63                    | 1:4.4              |                 |
| 10                 | <b>1a</b> | Bi(OTf) <sub>3</sub>                                  | DCE                             | 8      | 26                    | 57       | 1:2.2    | 29 <sup>i</sup>   | <b>1a</b>          | Bi(OTf) <sub>3</sub> | toluene                       | 2.5     | 15     | 61                    | 1:4.4              |                 |
| 11                 | <b>1a</b> | Ba(OTf) <sub>2</sub>                                  | DCE                             | 0.25   | 28                    | 35       | 1:1.2    | 30 <sup>g,h</sup> | <b>1b</b>          | Bi(OTf) <sub>3</sub> | toluene                       | 0.25    | 12     | 79                    | 1:6.6              |                 |
| 12                 | <b>1a</b> | Fe(OTf) <sub>3</sub>                                  | DCE                             | 3.5    | 26                    | 50       | 1:1.9    | 31 <sup>g,h</sup> | <b>1c</b>          | Bi(OTf) <sub>3</sub> | toluene                       | 0.5     | 10     | 53                    | 1:5.3              |                 |
| 13                 | <b>1a</b> | In(OTf) <sub>3</sub>                                  | DCE                             | 5.0    | 26                    | 52       | 1:2.0    | 32 <sup>g,h</sup> | <b>1d</b>          | Bi(OTf) <sub>3</sub> | toluene                       | 0.25    | <5     | 83                    | <20:1              |                 |
| 14                 | <b>1a</b> | BiBr <sub>3</sub>                                     | DCE                             | 8      | 31                    | 43       | 1:1.4    | 33 <sup>g,h</sup> | <b>1e</b>          | Bi(OTf) <sub>3</sub> | toluene                       | 1.0     | 17     | 68                    | 1:4.0              |                 |
| 15                 | <b>1a</b> | BF <sub>3</sub> ·Et <sub>2</sub> O                    | DCE                             | 3.5    | 29                    | 49       | 1:1.7    | 34 <sup>g,h</sup> | <b>1f</b>          | Bi(OTf) <sub>3</sub> | toluene                       | 3.5     | 15     | 64                    | 1:4.3              |                 |
| 16                 | <b>1a</b> | Bi(OTf) <sub>3</sub>                                  | EtOAc                           | 3.5    | 19                    | 60       | 1:3.2    | 35 <sup>g,h</sup> | <b>1g</b>          | Bi(OTf) <sub>3</sub> | toluene                       | 3.0     | 20     | 68                    | 1:3.4              |                 |
| 17                 | <b>1a</b> | Bi(OTf) <sub>3</sub>                                  | EtOH                            | 12     | 30                    | 35       | 1:1.2    | 36 <sup>g,h</sup> | <b>1d</b>          | Bi(OTf) <sub>3</sub> | TFE                           | 4.0     | 11     | - <sup>j</sup>        | 1:6.3 <sup>e</sup> |                 |
| 18                 | <b>1a</b> | Bi(OTf) <sub>3</sub>                                  | CH <sub>3</sub> CN              | 4      | 42                    | 43       | 1:1      | 37 <sup>g,h</sup> | <b>1d</b>          | Bi(OTf) <sub>3</sub> | toluene <sup>l</sup>          | 1.0     | -      | 78 <sup>m</sup>       | 0:1 <sup>e</sup>   |                 |
| 19                 | <b>1a</b> | Bi(OTf) <sub>3</sub>                                  | CH <sub>3</sub> NO <sub>2</sub> | 1.0    | 41                    | 42       | 1:1      |                   |                    |                      |                               |         |        |                       |                    |                 |

<sup>a</sup> **1** (0.1 mmol), **2a** (0.1 mmol); <sup>b</sup> NMR yield using trimethoxybenzene as internal standard; <sup>c</sup> rr (**3:4**) is the regioisomeric ratio and is determined by <sup>1</sup>H NMR analysis of crude products; <sup>d</sup> 54% yield of **5a** detected, TFE = CF<sub>3</sub>CH<sub>2</sub>OH; <sup>e</sup> rr of **3a:5a**; <sup>f</sup> 80 °C; <sup>g</sup> 5 Å MS was added; <sup>h</sup> **2a** (1.1 equivs); <sup>i</sup> **2a** (1.5 equivs); <sup>j</sup> 69% yield of **5a** detected; <sup>k</sup> 0.3 mmol scale; <sup>l</sup> TFE was added in place of toluene after the first step finished; <sup>m</sup> Isolated yield of **5d**.

### 3. General procedure for dearomative C3-phosphorylation of 2-benzofuran-ols and analogues

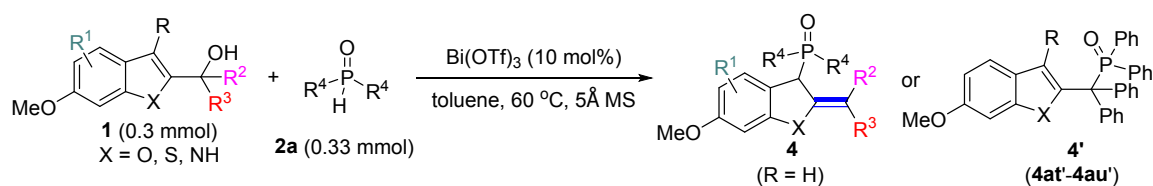

The reaction was carried out under an air atmosphere. To a 10-mL vial were added alcohols **1** (0.3 mmol, 1.0 equiv),  $\text{R}^4_2\text{P}(\text{O})\text{H}$  **2** (0.33 mmol, 1.1 equivs),  $\text{Bi}(\text{OTf})_3$  (19.7 mg, 10 mol%) and 300 mg 5Å MS. After adding 3.0 mL of anhydrous toluene, the reaction mixture was stirred at 60 °C till almost full conversion of **1** by TLC analysis. The reaction mixture was directly subjected to column chromatography using petrol ether/ethyl acetate (generally 4:1 to 1:1, v:v) as the eluent to afford products **4** or **4'**.

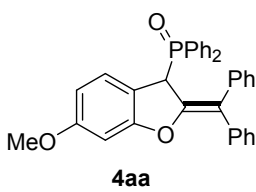

Column chromatography afforded the desired product **4aa** in 81% yield (125.0 mg) as white solid, Mp: 90-92 °C;  $^1\text{H}$  NMR (600 MHz,  $\text{CDCl}_3$ ):  $\delta$  = 7.63-7.60 (m, 2H), 7.46-7.43 (m, 4H), 7.33-7.28 (m, 4H), 7.27-7.25 (m, 2H), 7.21-7.15 (m, 4H), 7.12-7.10 (m, 2H), 6.91-6.90 (m, 2H), 6.66-6.65 (m, 1H), 6.34-6.33 (m, 2H), 5.54 (d,  $J$  = 15.0 Hz, 1H), 3.70 (s, 3H);  $^{13}\text{C}\{^1\text{H}\}$  NMR (150 MHz,  $\text{CDCl}_3$ ):  $\delta$  = 160.9 (d,  $J_{\text{C-P}}$  = 3.0 Hz), 159.7 (d,  $J_{\text{C-P}}$  = 4.5 Hz), 149.4 (d,  $J_{\text{C-P}}$  = 10.5 Hz), 139.7 (d,  $J_{\text{C-P}}$  = 3.0 Hz), 139.2 (d,  $J_{\text{C-P}}$  = 4.5 Hz), 131.72 (d,  $J_{\text{C-P}}$  = 3.0 Hz), 131.66 (d,  $J_{\text{C-P}}$  = 3.0 Hz), 131.6 (d,  $J_{\text{C-P}}$  = 6.0 Hz), 131.5 (d,  $J_{\text{C-P}}$  = 7.5 Hz), 130.4 (d,  $J_{\text{C-P}}$  = 96.0 Hz), 130.3 (d,  $J_{\text{C-P}}$  = 1.5 Hz), 129.74 (d,  $J_{\text{C-P}}$  = 3.0 Hz), 129.71 (d,  $J_{\text{C-P}}$  = 96.0 Hz), 128.6, 128.3 (d,  $J_{\text{C-P}}$  = 12.0 Hz), 128.2 (d,  $J_{\text{C-P}}$  = 12.0 Hz), 127.6, 126.7 (d,  $J_{\text{C-P}}$  = 3.0 Hz), 125.8 (d,  $J_{\text{C-P}}$  = 3.0 Hz), 120.8 (d,  $J_{\text{C-P}}$  = 12.0 Hz), 113.6 (d,  $J_{\text{C-P}}$  = 6.0 Hz), 107.8 (d,  $J_{\text{C-P}}$  = 3.0 Hz), 96.2, 55.4, 47.3 (d,  $J_{\text{C-P}}$  = 60.0 Hz);  $^{31}\text{P}\{^1\text{H}\}$  NMR (243 MHz,  $\text{CDCl}_3$ ):  $\delta$  = 29.5; HRMS (ESI): Exact mass calcd for  $\text{C}_{34}\text{H}_{27}\text{O}_3\text{P}$   $[\text{M}+\text{H}]^+$ : 515.1771, Found: 515.1764.

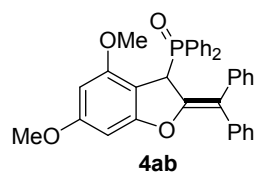

Column chromatography afforded **4ab** in 80% yield (130.6 mg) as white solid; Mp: 180-182 °C;  $^1\text{H}$  NMR (600 MHz,  $\text{CDCl}_3$ ):  $\delta$  = 7.54-7.51 (m, 2H), 7.42-7.36 (m, 4H), 7.31-7.28 (m, 2H), 7.28-7.26 (m, 3H), 7.25-7.23 (m, 3H), 7.20-7.17 (m, 1H), 7.13-7.08 (m, 3H), 6.88-6.86 (m, 2H), 6.22 (d,  $J$  = 1.8 Hz, 1H), 5.82 (d,  $J$  = 1.8 Hz, 1H), 5.44 (d,  $J$  = 10.8 Hz, 1H), 3.74 (s, 3H), 3.16 (s, 3H);  $^{13}\text{C}\{^1\text{H}\}$  NMR (150 MHz,  $\text{CDCl}_3$ ):  $\delta$  = 162.3, 160.3 (d,  $J_{\text{C-P}}$  = 4.5 Hz), 155.9, 150.4 (d,  $J_{\text{C-P}}$  = 10.5 Hz), 139.5 (d,  $J_{\text{C-P}}$  = 3.0 Hz), 138.9 (d,  $J_{\text{C-P}}$  =



3.0 Hz), 132.3, 131.7 (d,  $J_{C-P} = 16.5$  Hz), 131.5 (d,  $J_{C-P} = 9.0$  Hz), 131.4 (d,  $J_{C-P} = 9.0$  Hz), 131.2 (d,  $J_{C-P} = 7.5$  Hz), 130.5, 129.7, 128.4, 127.9 (d,  $J_{C-P} = 10.5$  Hz), 127.62, 127.55 (d,  $J_{C-P} = 12.0$  Hz), 126.7 (d,  $J_{C-P} = 30.0$  Hz), 120.8 (d,  $J_{C-P} = 12.0$  Hz), 102.3 (d,  $J_{C-P} = 7.5$  Hz), 92.4, 88.7, 55.6, 54.6, 47.4 (d,  $J_{C-P} = 57.0$  Hz);  $^{31}\text{P}\{^1\text{H}\}$  NMR (243 MHz,  $\text{CDCl}_3$ ):  $\delta = 29.6$ ; HRMS (ESI): Exact mass calcd for  $\text{C}_{35}\text{H}_{29}\text{O}_4\text{P}$   $[\text{M}+\text{H}]^+$ : 545.1876, Found: 545.1869.

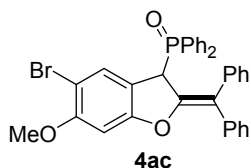

Column chromatography afforded the desired product **4ac** in 86% yield (153.0 mg)

as white solid; Mp: 184-186 °C;  $^1\text{H}$  NMR (600 MHz,  $\text{CDCl}_3$ ):  $\delta = 7.62$ -7.59 (m, 2H), 7.50-7.46 (m, 2H), 7.45-7.43 (m, 2H), 7.35-7.33 (m, 2H), 7.32-7.29 (m, 2H), 7.27-7.26 (m, 1H), 7.26-7.25 (m, 1H), 7.21-7.19 (m, 3H), 7.17-7.15 (m, 1H), 7.11-

7.08 (m, 2H), 6.87-6.85 (m, 2H), 6.71 (d,  $J = 2.4$  Hz, 1H), 6.42 (s, 1H), 5.51 (d,  $J = 13.2$  Hz, 1H), 3.78 (s, 3H);  $^{13}\text{C}\{^1\text{H}\}$  NMR (150 MHz,  $\text{CDCl}_3$ ):  $\delta = 159.1$ , 156.7, 149.1 (d,  $J_{C-P} = 10.5$  Hz), 139.2 (d,  $J_{C-P} = 64.5$  Hz), 131.9 (d,  $J_{C-P} = 15.0$  Hz), 131.4 (d,  $J_{C-P} = 9.0$  Hz), 130.19 (d,  $J_{C-P} = 96.0$  Hz), 130.18, 129.8, 129.5 (d,  $J_{C-P} = 109.5$  Hz), 129.3 (d,  $J_{C-P} = 1.5$  Hz), 128.7, 128.4 (d,  $J_{C-P} = 12.0$  Hz), 128.3 (d,  $J_{C-P} = 12.0$  Hz), 127.7, 126.9 (d,  $J_{C-P} = 10.5$  Hz), 121.4 (d,  $J_{C-P} = 12.0$  Hz), 114.8 (d,  $J_{C-P} = 7.5$  Hz), 103.1, 95.1, 56.4, 47.5 (d,  $J_{C-P} = 58.5$  Hz);  $^{31}\text{P}\{^1\text{H}\}$  NMR (243 MHz,  $\text{CDCl}_3$ ):  $\delta = 29.0$ ; HRMS (ESI): Exact mass calcd for  $\text{C}_{34}\text{H}_{26}\text{BrO}_3\text{P}$   $[\text{M}+\text{H}]^+$ : 593.0876, Found: 593.0883.

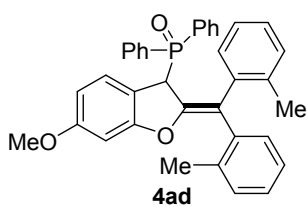

Column chromatography afforded the **4ad** in 90% yield (146.5 mg) as white

solid; Mp: 175-177 °C;  $^1\text{H}$  NMR (600 MHz,  $\text{CDCl}_3$ ):  $\delta = 7.53$ -7.50 (m, 2H), 7.47-7.38 (m, 5H), 7.34-7.31 (m, 2H), 7.26-7.23 (m, 3H), 7.16-7.08 (m, 4H), 6.98-6.83 (m, 3H), 6.39 (s, 1H), 6.19 (d,  $J = 7.2$  Hz, 1H), 5.73 (d,  $J = 312.0$

Hz, 1H), 3.68 (s, 3H), 2.31 (brs, 3H), 1.56 (brs, 3H);  $^{13}\text{C}\{^1\text{H}\}$  NMR (150 MHz,  $\text{CDCl}_3$ ):  $\delta = 160.9$ , 160.1, 131.82, 131.75, 131.3, 130.9 (d,  $J_{C-P} = 9.0$  Hz), 130.3, 130.1, 128.3 (d,  $J_{C-P} = 12.0$  Hz), 128.2 (d,  $J_{C-P} = 12.0$  Hz), 127.5, 126.7, 125.5 (d,  $J_{C-P} = 40.5$  Hz), 124.8, 113.4 (d,  $J_{C-P} = 6.0$  Hz), 107.6, 96.1, 55.4, 46.4 (d,  $J_{C-P} = 64.5$  Hz), 20.5, 20.0;  $^{31}\text{P}\{^1\text{H}\}$  NMR (243 MHz,  $\text{CDCl}_3$ ):  $\delta = 28.1$ ; HRMS (ESI): Exact mass calcd for  $\text{C}_{36}\text{H}_{31}\text{O}_3\text{P}$   $[\text{M}+\text{H}]^+$ : 543.2084, Found: 543.2078.

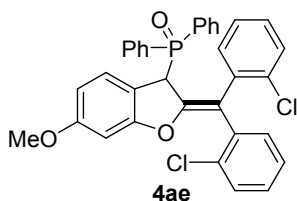

Column chromatography afforded the desired product **4ae** in 88% yield

(154.0 mg) as white solid; Mp: 102-104 °C;  $^1\text{H}$  NMR (600 MHz,  $\text{CDCl}_3$ ):  $\delta =$

7.67-7.64 (m, 2H), 7.50-7.48 (m, 1H), 7.47-7.42 (m, 4H), 7.35-7.32 (m, 7H), 7.16-7.13 (m, 4H), 6.33 (brs, 2H), 6.29-6.27(m, 1H), 5.44 (d,  $J = 17.4$  Hz, 1H), 3.68 (s, 3H);  $^{13}\text{C}\{^1\text{H}\}$  NMR (150 MHz,  $\text{CDCl}_3$ ):  $\delta = 161.1, 159.6$  (d,  $J_{\text{C-P}} = 4.5$  Hz), 133.4, 132.2 (d,  $J_{\text{C-P}} = 7.5$  Hz), 132.0 (d,  $J_{\text{C-P}} = 10.5$  Hz), 131.5 (d,  $J_{\text{C-P}} = 9.0$  Hz), 129.8, 128.6, 128.5, 128.4 (d,  $J_{\text{C-P}} = 3.0$  Hz), 128.3, 126.9, 126.3, 125.8, 114.0, 108.0, 96.3, 55.6, 48.6 (d,  $J_{\text{C-P}} = 60.0$  Hz);  $^{31}\text{P}\{^1\text{H}\}$  NMR (243 MHz,  $\text{CDCl}_3$ ):  $\delta = 29.4$ ; HRMS (ESI): Exact mass calcd for  $\text{C}_{34}\text{H}_{25}\text{Cl}_2\text{O}_3\text{P}$   $[\text{M}+\text{H}]^+$ : 583.0991, Found: 583.0989.

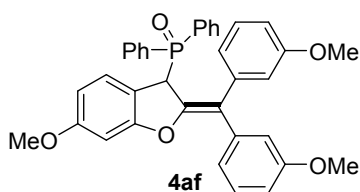

Column chromatography afforded the desired product **4af** in 86% yield (148.2 mg) as white solid; Mp: 172-174 °C;  $^1\text{H}$  NMR (600 MHz,  $\text{CDCl}_3$ ):  $\delta = 7.66$ -7.63 (m, 2H), 7.46-7.42 (m, 4H), 7.34-7.31 (m, 2H), 7.30-7.27 (m, 2H), 7.18-7.16 (m, 1H), 7.11-7.08 (m, 1H), 6.78-6.74 (m, 3H), 6.72-

6.68 (m, 3H), 6.35-6.32 (m, 2H), 6.24 (s, 1H), 5.60 (d,  $J = 15.6$  Hz, 1H), 3.74 (s, 3H), 3.69 (s, 3H), 3.64 (s, 3H);  $^{13}\text{C}\{^1\text{H}\}$  NMR (150 MHz,  $\text{CDCl}_3$ ):  $\delta = 160.9, 159.6$  (d,  $J_{\text{C-P}} = 4.5$  Hz), 159.2 (d,  $J_{\text{C-P}} = 96.0$  Hz), 149.7 (d,  $J_{\text{C-P}} = 10.5$  Hz), 140.9, 140.4 (d,  $J_{\text{C-P}} = 4.5$  Hz), 131.7 (d,  $J_{\text{C-P}} = 13.5$  Hz), 131.6, 131.4 (d,  $J_{\text{C-P}} = 9.0$  Hz), 130.6 (d,  $J_{\text{C-P}} = 96.0$  Hz), 129.4, 129.3 (d,  $J_{\text{C-P}} = 96.0$  Hz), 128.5, 128.2 (d,  $J_{\text{C-P}} = 12.0$  Hz), 128.0 (d,  $J_{\text{C-P}} = 10.5$  Hz), 126.0 (d,  $J_{\text{C-P}} = 1.5$  Hz), 122.4 (d,  $J_{\text{C-P}} = 6.0$  Hz), 120.4 (d,  $J_{\text{C-P}} = 10.5$  Hz), 115.8 (d,  $J_{\text{C-P}} = 54.0$  Hz), 113.5 (d,  $J_{\text{C-P}} = 7.5$  Hz), 112.5 (d,  $J_{\text{C-P}} = 90.0$  Hz), 107.8, 96.1, 55.4, 55.2, 54.9, 47.3 (d,  $J_{\text{C-P}} = 58.5$  Hz);  $^{31}\text{P}\{^1\text{H}\}$  NMR (243 MHz,  $\text{CDCl}_3$ ):  $\delta = 29.6$ ; HRMS (ESI): Exact mass calcd for  $\text{C}_{36}\text{H}_{31}\text{O}_5\text{P}$   $[\text{M}+\text{H}]^+$ : 575.1982, Found: 575.1981.

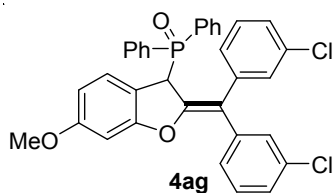

Column chromatography afforded the desired product **4ag** in 87% yield (152.3 mg) as white solid; Mp: 78-80 °C;  $^1\text{H}$  NMR (600 MHz,  $\text{CDCl}_3$ ):  $\delta = 7.63$ -7.60 (m, 2H), 7.52-7.46 (m, 4H), 7.36-7.32 (m, 4H), 7.21-7.12 (m, 5H), 7.02-6.98 (m, 2H), 6.69 (s, 1H), 6.58 (dd,  $J = 6.0$  Hz, 2.4 Hz, 1H), 6.38-

6.37 (m, 1H), 6.34 (dd,  $J = 6.0$  Hz, 2.4 Hz, 1H), 5.50 (d,  $J = 15.0$  Hz, 1H), 3.71 (s, 3H);  $^{13}\text{C}\{^1\text{H}\}$  NMR (150 MHz,  $\text{CDCl}_3$ ):  $\delta = 161.0, 159.4$  (d,  $J_{\text{C-P}} = 4.5$  Hz), 151.2 (d,  $J_{\text{C-P}} = 9.0$  Hz), 141.1 (d,  $J_{\text{C-P}} = 3.0$  Hz), 140.4 (d,  $J_{\text{C-P}} = 3.0$  Hz), 134.1 (d,  $J_{\text{C-P}} = 126.0$  Hz), 132.1, 131.5 (d,  $J_{\text{C-P}} = 9.0$  Hz), 131.4 (d,  $J_{\text{C-P}} = 9.0$  Hz), 130.5, 130.3, 129.85, 129.6, 129.4 (d,  $J_{\text{C-P}} = 97.5$  Hz), 129.0, 128.3 (d,  $J_{\text{C-P}} = 13.5$  Hz), 128.2, 127.9, 127.3 (d,  $J_{\text{C-P}} = 66.0$  Hz), 125.7 (d,  $J_{\text{C-P}} = 1.5$  Hz), 118.2 (d,  $J_{\text{C-P}} = 10.5$  Hz), 113.2 (d,  $J_{\text{C-P}} = 7.5$  Hz),

108.2, 96.2, 55.5, 47.6 (d,  $J_{C-P} = 58.5$  Hz);  $^{31}P\{^1H\}$  NMR (243 MHz,  $CDCl_3$ ):  $\delta = 29.3$ ; HRMS (ESI): Exact mass calcd for  $C_{34}H_{25}Cl_2O_3P$   $[M+H]^+$ : 583.0991, Found: 583.0989.

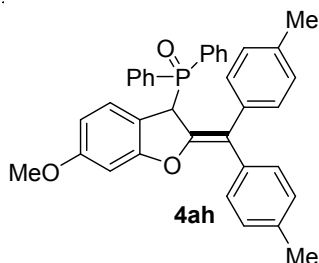

Column chromatography afforded the desired product **4ah** in 84% yield (136.7 mg) as white solid; Mp: 232-234 °C;  $^1H$  NMR (600 MHz,  $CDCl_3$ ):  $\delta = 7.65-7.62$  (m, 2H), 7.46-7.42 (m, 4H), 7.33-7.30 (m, 2H), 7.29-7.26 (m, 2H), 7.11-7.06 (m, 4H), 6.88 (AB,  $J = 7.8$  Hz, 2H), 6.78 (AB,  $J = 7.8$  Hz, 2H), 6.72-6.71 (m, 1H), 6.35-6.33 (m, 2H), 5.54 (d,  $J = 15.0$  Hz, 1H), 3.70 (s, 3H), 2.34 (s, 3H), 2.32 (s, 3H);  $^{13}C\{^1H\}$  NMR (150 MHz,  $CDCl_3$ ):  $\delta = 160.9$ , 159.8, 148.7 (d,  $J_{C-P} = 10.5$  Hz), 136.6 (d,  $J_{C-P} = 37.5$  Hz), 136.2 (d,  $J_{C-P} = 52.5$  Hz), 131.6 (d,  $J_{C-P} = 7.5$  Hz), 131.4 (d,  $J_{C-P} = 9.0$  Hz), 130.7 (d,  $J_{C-P} = 96.0$  Hz), 129.8 (d,  $J_{C-P} = 73.5$  Hz), 129.6 (d,  $J_{C-P} = 96.0$  Hz), 129.4, 128.4, 128.2 (d,  $J_{C-P} = 10.5$  Hz), 128.0 (d,  $J_{C-P} = 12.0$  Hz), 120.5 (d,  $J_{C-P} = 10.5$  Hz), 113.7 (d,  $J_{C-P} = 7.5$  Hz), 107.6, 96.1, 55.4, 47.2 (d,  $J_{C-P} = 60.0$  Hz), 21.24, 21.18;  $^{31}P\{^1H\}$  NMR (243 MHz,  $CDCl_3$ ):  $\delta = 29.4$ ; HRMS (ESI): Exact mass calcd for  $C_{36}H_{31}O_3P$   $[M+H]^+$ : 543.2084, Found: 543.2079.

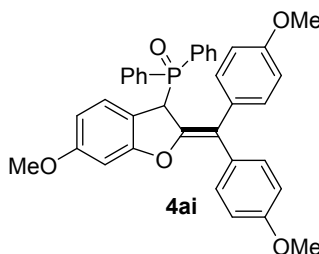

Column chromatography afforded the desired product **4ai** in 83% yield (143.1 mg) as white solid; Mp: 198-200 °C;  $^1H$  NMR (600 MHz,  $CDCl_3$ ):  $\delta = 7.65-7.62$  (m, 2H), 7.46-7.42 (m, 4H), 7.34-7.27 (m, 4H), 7.15 (AB,  $J = 8.4$  Hz, 2H), 6.81-6.79 (m, 4H), 6.71-6.69 (m, 1H), 6.61 (AB,  $J = 8.4$  Hz, 2H), 6.34-6.33 (m, 2H), 5.51 (d,  $J = 15.0$  Hz, 1H), 3.82 (s, 3H), 3.79 (s, 3H), 3.70 (s, 3H);  $^{13}C\{^1H\}$  NMR (150 MHz,  $CDCl_3$ ):  $\delta = 160.9$ , 159.8, 158.2 (d,  $J_{C-P} = 12.0$  Hz), 148.0 (d,  $J_{C-P} = 10.5$  Hz), 132.0 (d,  $J_{C-P} = 3.0$  Hz), 131.9 (d,  $J_{C-P} = 4.5$  Hz), 131.7 (d,  $J_{C-P} = 4.5$  Hz), 131.6, 131.4 (d,  $J_{C-P} = 9.0$  Hz), 131.1 (d,  $J_{C-P} = 69.0$  Hz), 130.8 (d,  $J_{C-P} = 96.0$  Hz), 129.7 (d,  $J_{C-P} = 97.5$  Hz), 128.2 (d,  $J_{C-P} = 12.0$  Hz), 128.1 (d,  $J_{C-P} = 12.0$  Hz), 125.9 (d,  $J_{C-P} = 3.0$  Hz), 114.1, 113.7 (d,  $J_{C-P} = 7.5$  Hz), 113.0, 107.6, 96.1, 55.4, 55.2, 55.1, 47.2 (d,  $J_{C-P} = 60.0$  Hz);  $^{31}P\{^1H\}$  NMR (243 MHz,  $CDCl_3$ ):  $\delta = 29.3$ ; HRMS (ESI): Exact mass calcd for  $C_{36}H_{31}O_5P$   $[M+H]^+$ : 575.1982, Found: 575.1981.

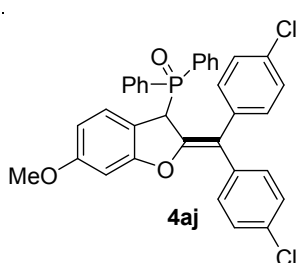

Column chromatography afforded **4aj** in 83% yield (145.3 mg) as white solid; Mp: 228-230 °C;  $^1H$  NMR (600 MHz,  $CDCl_3$ ):  $\delta = 7.62-7.58$  (m, 2H), 7.51-7.43 (m, 4H), 7.35-7.32 (m, 4H), 7.23-7.21 (m, 2H), 7.12-7.10 (m, 2H), 7.06-

7.04 (m, 2H), 6.85-6.83 (m, 2H), 6.55-6.53 (m, 1H), 6.362-6.359 (m, 1H), 6.33-6.31 (m, 1H), 5.45 (d,  $J = 14.4$  Hz, 1H), 3.70 (s, 3H);  $^{13}\text{C}\{^1\text{H}\}$  NMR (150 MHz,  $\text{CDCl}_3$ ):  $\delta = 161.0, 159.5$  (d,  $J_{\text{C-P}} = 4.5$  Hz), 150.3 (d,  $J_{\text{C-P}} = 9.0$  Hz), 137.8, 137.2 (d,  $J_{\text{C-P}} = 3.0$  Hz), 132.7 (d,  $J_{\text{C-P}} = 45.0$  Hz), 131.8, 131.5 (d,  $J_{\text{C-P}} = 12.0$  Hz), 131.2 (d,  $J_{\text{C-P}} = 52.5$  Hz), 130.2 (d,  $J_{\text{C-P}} = 96.0$  Hz), 129.7 (d,  $J_{\text{C-P}} = 96.0$  Hz), 129.0, 128.4 (d,  $J_{\text{C-P}} = 7.5$  Hz), 128.3 (d,  $J_{\text{C-P}} = 7.5$  Hz), 128.0, 125.8 (d,  $J_{\text{C-P}} = 3.0$  Hz), 118.4 (d,  $J_{\text{C-P}} = 10.5$  Hz), 113.1 (d,  $J_{\text{C-P}} = 6.0$  Hz), 108.0, 96.2, 55.5, 47.3 (d,  $J_{\text{C-P}} = 58.5$  Hz);  $^{31}\text{P}\{^1\text{H}\}$  NMR (243 MHz,  $\text{CDCl}_3$ ):  $\delta = 29.1$ ; HRMS (ESI): Exact mass calcd for  $\text{C}_{34}\text{H}_{25}\text{Cl}_2\text{O}_3\text{P}$   $[\text{M}+\text{H}]^+$ : 583.0991, Found: 583.0991.

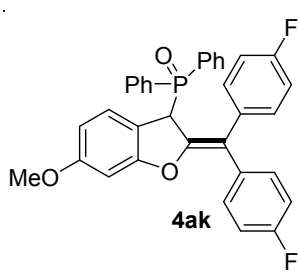

Column chromatography afforded the desired product **4ak** in 89% yield (147.0 mg) as white solid; Mp: 210-212 °C;  $^1\text{H}$  NMR (600 MHz,  $\text{CDCl}_3$ ):  $\delta = 7.62$ -7.59 (m, 2H), 7.50-7.44 (m, 4H), 7.35-7.32 (m, 4H), 7.15-7.13 (m, 2H), 6.96-6.93 (m, 2H), 6.90-6.88 (m, 2H), 6.82-6.79 (m, 2H), 6.55-6.53 (m, 1H), 6.36-6.35 (m, 1H), 6.32-6.31 (m, 1H), 5.44 (d,  $J = 14.4$  Hz, 1H), 3.70 (s, 3H);

$^{13}\text{C}\{^1\text{H}\}$  NMR (150 MHz,  $\text{CDCl}_3$ ):  $\delta = 162.4$  (d,  $J_{\text{C-F}} = 16.5$  Hz), 161.0, 160.7 (d,  $J_{\text{C-P}} = 18.0$  Hz), 159.6 (d,  $J_{\text{C-P}} = 4.5$  Hz), 149.6 (d,  $J_{\text{C-P}} = 10.5$  Hz), 135.2 (d,  $J_{\text{C-F}} = 72.0$  Hz), 131.8, 131.6 (d,  $J_{\text{C-P}} = 9.0$  Hz), 131.4 (d,  $J_{\text{C-P}} = 9.0$  Hz), 131.3 (d,  $J_{\text{C-P}} = 6.0$  Hz), 130.2 (d,  $J_{\text{C-P}} = 97.5$  Hz), 130.0 (d,  $J_{\text{C-P}} = 96.0$  Hz), 128.33 (d,  $J_{\text{C-P}} = 3.0$  Hz), 128.26 (d,  $J_{\text{C-P}} = 4.5$  Hz), 125.8, 118.7 (d,  $J_{\text{C-P}} = 10.5$  Hz), 115.7 (d,  $J_{\text{C-P}} = 21.0$  Hz), 114.6 (d,  $J_{\text{C-P}} = 21.0$  Hz), 113.3 (d,  $J_{\text{C-P}} = 7.5$  Hz), 107.9, 96.2, 55.5, 47.3 (d,  $J_{\text{C-P}} = 60.0$  Hz);  $^{31}\text{P}\{^1\text{H}\}$  NMR (243 MHz,  $\text{CDCl}_3$ ):  $\delta = 29.1$ ;  $^{19}\text{F}\{^1\text{H}\}$  NMR (565 MHz,  $\text{CDCl}_3$ ):  $\delta = -114.75, -114.85$ ; HRMS (ESI): Exact mass calcd for  $\text{C}_{34}\text{H}_{25}\text{F}_2\text{O}_3\text{P}$   $[\text{M}+\text{H}]^+$ : 551.1582, Found: 551.1580.

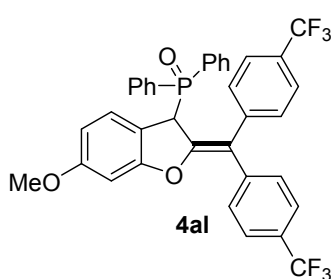

Column chromatography afforded product **4al** in 68% yield (132.7 mg) as white solid; Mp: 145-147 °C;  $^1\text{H}$  NMR (600 MHz,  $\text{CDCl}_3$ ):  $\delta = 7.61$ -7.58 (m, 2H), 7.53-7.44 (m, 6H), 7.37-7.28 (m, 8H), 7.05-7.04 (m, 2H), 6.50 (dd,  $J = 8.4$  Hz, 1.8 Hz, 1H), 6.39 (d,  $J = 2.4$  Hz, 1H), 6.33 (dd,  $J = 8.4$  Hz, 1.8 Hz, 1H), 5.49 (d,  $J = 13.8$  Hz, 1H), 3.71 (s, 3H);  $^{13}\text{C}\{^1\text{H}\}$  NMR (150 MHz,

$\text{CDCl}_3$ ):  $\delta = 161.1, 159.4, 152.0$  (d,  $J_{\text{C-P}} = 10.5$  Hz), 142.6 (d,  $J_{\text{C-F}} = 138.0$  Hz), 132.1 (d,  $J_{\text{C-P}} = 9.0$  Hz), 131.5 (d,  $J_{\text{C-P}} = 9.0$  Hz), 131.3 (d,  $J_{\text{C-P}} = 9.0$  Hz), 130.3 (d,  $J_{\text{C-P}} = 76.5$  Hz), 130.0 (d,  $J_{\text{C-P}} = 97.5$  Hz), 129.7 (d,  $J_{\text{C-P}} = 97.5$  Hz), 128.8 (qd,  $J_{\text{C-F}} = 10.5$  Hz, 6.0 Hz), 128.4 (d,  $J_{\text{C-P}} = 12.0$  Hz), 125.7 (d,  $J_{\text{C-P}} = 7.5$  Hz), 124.8, 124.1 (qd,  $J_{\text{C-F}} = 270.0$  Hz, 9.0 Hz), 118.2 (d,  $J_{\text{C-P}} = 10.5$  Hz), 112.9 (d,  $J_{\text{C-P}} = 7.5$  Hz), 108.3,

96.3, 55.5, 47.5 (d,  $J_{C-P} = 57.0$  Hz);  $^{31}\text{P}\{^1\text{H}\}$  NMR (243 MHz,  $\text{CDCl}_3$ ):  $\delta = 28.9$ ;  $^{19}\text{F}\{^1\text{H}\}$  NMR (565 MHz,  $\text{CDCl}_3$ ):  $\delta = -62.41, -62.42$ ; HRMS (ESI): Exact mass calcd for  $\text{C}_{36}\text{H}_{25}\text{F}_6\text{O}_3\text{P}$   $[\text{M}+\text{H}]^+$ : 651.1518, Found: 651.1517.

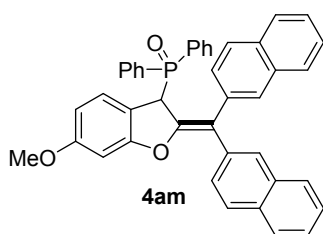

Column chromatography afforded the desired product **4am** in 81% yield (149.4 mg) as white solid; Mp: 213-215 °C;  $^1\text{H}$  NMR (600 MHz,  $\text{CDCl}_3$ ):  $\delta = 7.81-7.78$  (m, 2H), 7.75-7.71 (m, 3H), 7.63-7.60 (m, 3H), 7.57-7.56 (m, 1H), 7.52-7.46 (m, 2H), 7.46-7.39 (m, 5H), 7.36-7.28 (m, 3H), 7.16-7.13 (m, 2H), 7.11-7.08 (m, 2H), 7.06-7.04 (m, 1H), 6.71-6.69 (m, 1H), 6.39-6.36 (m,

2H), 5.74 (d,  $J = 14.4$  Hz, 1H), 3.71 (s, 3H);  $^{13}\text{C}\{^1\text{H}\}$  NMR (150 MHz,  $\text{CDCl}_3$ ):  $\delta = 161.0, 159.8$  (d,  $J_{C-P} = 4.5$  Hz), 150.3 (d,  $J_{C-P} = 9.0$  Hz), 136.9 (d,  $J_{C-P} = 91.5$  Hz), 133.3 (d,  $J_{C-P} = 84.0$  Hz), 132.4 (d,  $J_{C-P} = 10.5$  Hz), 131.7 (d,  $J_{C-P} = 22.5$  Hz), 131.5 (d,  $J_{C-P} = 9.0$  Hz), 131.3 (d,  $J_{C-P} = 9.0$  Hz), 130.7 (d,  $J_{C-P} = 96.0$  Hz), 129.4 (d,  $J_{C-P} = 97.5$  Hz), 129.2 (d,  $J_{C-P} = 31.5$  Hz), 128.3 (d,  $J_{C-P} = 9.0$  Hz), 128.1 (d,  $J_{C-P} = 3.0$  Hz), 128.0, 127.9 (d,  $J_{C-P} = 12.0$  Hz), 127.5 (d,  $J_{C-P} = 15.0$  Hz), 127.0, 126.0, 125.9, 120.6 (d,  $J_{C-P} = 10.5$  Hz), 113.4 (d,  $J_{C-P} = 7.5$  Hz), 107.9, 96.1, 55.4, 47.3 (d,  $J_{C-P} = 58.5$  Hz);  $^{31}\text{P}\{^1\text{H}\}$  NMR (243 MHz,  $\text{CDCl}_3$ ):  $\delta = 29.2$ ; HRMS (ESI): Exact mass calcd for  $\text{C}_{42}\text{H}_{31}\text{O}_3\text{P}$   $[\text{M}+\text{H}]^+$ : 615.2084, Found: 615.2083.

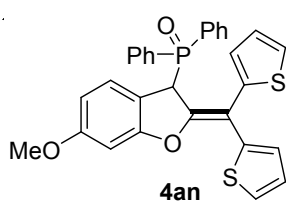

Column chromatography afforded the **4an** in 73% yield (115.3 mg) as white solid; Mp: 168-170 °C;  $^1\text{H}$  NMR (600 MHz,  $\text{CDCl}_3$ ):  $\delta = 7.64-7.61$  (m, 2H), 7.48-7.43 (m, 4H), 7.36-7.29 (m, 4H), 7.26-7.25 (m, 1H), 7.19-7.18 (m, 1H), 6.97-6.94 (m, 2H), 6.79 (dd,  $J = 8.4$  Hz, 2.4 Hz, 1H), 6.76-6.74 (m, 1H), 6.494-

6.489 (m, 1H), 6.430-6.426 (m, 1H), 6.39 (dd,  $J = 8.4$  Hz, 2.4 Hz, 1H), 5.59 (d,  $J = 16.8$  Hz, 1H), 3.72 (s, 3H);  $^{13}\text{C}\{^1\text{H}\}$  NMR (150 MHz,  $\text{CDCl}_3$ ):  $\delta = 161.0, 159.1$  (d,  $J_{C-P} = 4.5$  Hz), 150.1 (d,  $J_{C-P} = 10.5$  Hz), 141.4 (d,  $J_{C-P} = 6.0$  Hz), 138.4, 131.7 (d,  $J_{C-P} = 27.0$  Hz), 131.6, 131.4 (d,  $J_{C-P} = 9.0$  Hz), 130.6 (d,  $J_{C-P} = 96.0$  Hz), 129.7, 129.0 (d,  $J_{C-P} = 97.5$  Hz), 128.4 (d,  $J_{C-P} = 12.0$  Hz), 128.2 (d,  $J_{C-P} = 10.5$  Hz), 127.6, 127.0 (d,  $J_{C-P} = 1.5$  Hz), 126.2 (d,  $J_{C-P} = 9.0$  Hz), 125.6, 125.4, 113.8 (d,  $J_{C-P} = 7.5$  Hz), 108.2, 108.0 (d,  $J_{C-P} = 10.5$  Hz), 96.2, 55.5, 48.5 (d,  $J_{C-P} = 58.5$  Hz);  $^{31}\text{P}\{^1\text{H}\}$  NMR (243 MHz,  $\text{CDCl}_3$ ):  $\delta = 29.3$ ; HRMS (ESI): Exact mass calcd for  $\text{C}_{30}\text{H}_{23}\text{O}_3\text{PS}_2$   $[\text{M}+\text{H}]^+$ : 527.0899, Found: 527.0894.

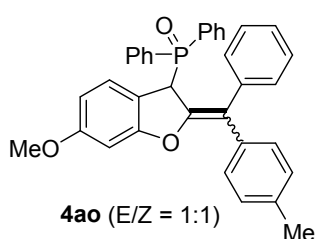

Column chromatography afforded the desired product **4ao** in 84% yield (133.2 mg) as white solid; Mp: 211-213 °C; <sup>1</sup>H NMR (600 MHz, CDCl<sub>3</sub>): δ = 7.64-7.63 (m, 1H), 7.62-7.60 (m, 1H), 7.45-7.41 (m, 4H), 7.32-7.26 (m, 4H), 7.25-7.23 (m, 1H), 7.20-7.13 (m, 2H), 7.11-7.06 (m, 3H), 6.890-6.888 (m, 1H), 6.878-6.875 (m, 1H), 6.79-6.78 (m, 1H), 6.71-6.69 (m, 0.5 H), 6.67-6.65 (m, 0.5 H), 6.34-6.32 (m, 2H), 5.54 (d, *J* = 15.0 Hz, 0.5 H), 5.53 (d, *J* = 15.0 Hz, 0.5 H), 3.68 (s, 3H), 2.33 (s, 1.5 H), 2.32 (s, 1.5 H); <sup>13</sup>C{<sup>1</sup>H} NMR (150 MHz, CDCl<sub>3</sub>): δ = 160.9, 159.8, 149.2 (d, *J*<sub>C-P</sub> = 9.0 Hz), 149.0 (d, *J*<sub>C-P</sub> = 10.5 Hz), 139.5 (d, *J*<sub>C-P</sub> = 72.0 Hz), 136.6 (d, *J*<sub>C-P</sub> = 3.0 Hz), 136.5, 136.3 (d, *J*<sub>C-P</sub> = 4.5 Hz), 136.2, 131.6 (d, *J*<sub>C-P</sub> = 7.5 Hz), 131.5, 131.4 (d, *J*<sub>C-P</sub> = 6.0 Hz), 130.8 (d, *J*<sub>C-P</sub> = 33.0 Hz), 130.2 (d, *J*<sub>C-P</sub> = 30.0 Hz), 129.9, 129.7 (d, *J*<sub>C-P</sub> = 13.5 Hz), 129.4, 129.2, 128.5 (d, *J*<sub>C-P</sub> = 31.5 Hz), 128.3 (d, *J*<sub>C-P</sub> = 12.0 Hz), 128.2 (d, *J*<sub>C-P</sub> = 7.5 Hz), 128.1 (d, *J*<sub>C-P</sub> = 7.5 Hz), 128.0, 127.6, 126.6 (d, *J*<sub>C-P</sub> = 3.0 Hz), 125.9 (d, *J*<sub>C-P</sub> = 30.0 Hz), 120.8 (d, *J*<sub>C-P</sub> = 12.0 Hz), 120.6 (d, *J*<sub>C-P</sub> = 10.5 Hz), 113.63, 113.59, 107.7, 96.2, 96.1, 55.4, 47.3 (d, *J*<sub>C-P</sub> = 58.5 Hz), 47.2 (d, *J*<sub>C-P</sub> = 58.5 Hz), 21.23, 21.18; <sup>31</sup>P{<sup>1</sup>H} NMR (243 MHz, CDCl<sub>3</sub>): δ = 28.8; HRMS (ESI): Exact mass calcd for C<sub>35</sub>H<sub>29</sub>O<sub>3</sub>P [M+H]<sup>+</sup>: 529.1927, Found: 529.1920.

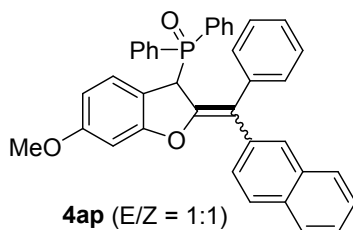

Column chromatography afforded the desired product **4ap+iso-4ap** in 83% yield (140.6 mg) as white solid; Mp: 226-228 °C; Spectra data for **4ap**: <sup>1</sup>H NMR (600 MHz, CDCl<sub>3</sub>): δ = 7.78-7.77 (m, 1H), 7.61-7.56 (m, 3H), 7.54-7.52 (m, 1H), 7.49-7.44 (m, 2H), 7.40 (s, 1H), 7.35-7.31 (m, 3H), 7.28-7.24 (m, 5H), 7.23-7.19 (m, 1H), 7.16-7.13 (m, 2H), 7.04-6.98 (m, 3H), 6.74-6.72 (m, 1H), 6.36-6.35 (m, 2H), 5.66 (d, *J* = 15.0 Hz, 1H), 3.70 (s, 3H); <sup>13</sup>C{<sup>1</sup>H} NMR (150 MHz, CDCl<sub>3</sub>): δ = 161.0, 159.7 (d, *J*<sub>C-P</sub> = 4.5 Hz), 149.9 (d, *J*<sub>C-P</sub> = 10.5 Hz), 139.2 (d, *J*<sub>C-P</sub> = 4.5 Hz), 137.2, 133.5, 132.1 (d, *J*<sub>C-P</sub> = 88.5 Hz), 131.5 (d, *J*<sub>C-P</sub> = 9.0 Hz), 131.3 (d, *J*<sub>C-P</sub> = 9.0 Hz), 130.7 (d, *J*<sub>C-P</sub> = 96.0 Hz), 129.9, 129.3 (d, *J*<sub>C-P</sub> = 96.0 Hz), 129.2, 128.3, 128.04 (d, *J*<sub>C-P</sub> = 4.5 Hz), 127.93 (d, *J*<sub>C-P</sub> = 12.0 Hz), 127.7, 127.5, 126.8, 126.0, 125.9 (d, *J*<sub>C-P</sub> = 18.0 Hz), 120.5 (d, *J*<sub>C-P</sub> = 12.0 Hz), 113.5 (d, *J*<sub>C-P</sub> = 7.5 Hz), 107.8, 96.1, 55.5, 47.3 (d, *J*<sub>C-P</sub> = 58.5 Hz); <sup>31</sup>P{<sup>1</sup>H} NMR (243 MHz, CDCl<sub>3</sub>): δ = 29.3; HRMS (ESI): Exact mass calcd for C<sub>38</sub>H<sub>29</sub>O<sub>3</sub>P [M+H]<sup>+</sup>: 565.1927, Found: 565.1920.

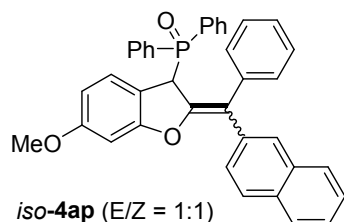

Spectra data for *iso-4ap*: <sup>1</sup>H NMR (600 MHz, CDCl<sub>3</sub>): δ = 7.78-7.74 (m, 2H), 7.71-7.70 (m, 1H), 7.68-7.64 (m, 3H), 7.52-7.46 (m, 3H), 7.45-7.42

(m, 3H), 7.35-7.32 (m, 4H), 7.29-7.27 (m, 1H), 7.20-7.18 (m, 1H), 7.15-7.12 (m, 2H), 6.96-6.94 (m, 2H), 6.63-6.61 (m, 1H), 6.36-6.33 (m, 2H), 5.61 (d,  $J = 14.4$  Hz, 1H), 3.70 (s, 3H);  $^{13}\text{C}\{^1\text{H}\}$  NMR (150 MHz,  $\text{CDCl}_3$ ):  $\delta = 161.0, 159.8, 149.9$  (d,  $J_{\text{C-P}} = 10.5$  Hz), 139.8, 136.7, 132.6 (d,  $J_{\text{C-P}} = 106.5$  Hz), 131.7, 131.6 (d,  $J_{\text{C-P}} = 9.0$  Hz), 130.4 (d,  $J_{\text{C-P}} = 94.5$  Hz), 130.38, 129.9 (d,  $J_{\text{C-P}} = 96.0$  Hz), 128.9, 128.7, 128.4 (d,  $J_{\text{C-P}} = 12.0$  Hz), 128.2 (d,  $J_{\text{C-P}} = 12.0$  Hz), 128.1, 127.9, 127.4, 126.9 (d,  $J_{\text{C-P}} = 27.0$  Hz), 125.8 (d,  $J_{\text{C-P}} = 3.0$  Hz), 120.9 (d,  $J_{\text{C-P}} = 10.5$  Hz), 113.6 (d,  $J_{\text{C-P}} = 7.5$  Hz), 107.9, 96.2, 55.4, 47.4 (d,  $J_{\text{C-P}} = 58.5$  Hz);  $^{31}\text{P}\{^1\text{H}\}$  NMR (243 MHz,  $\text{CDCl}_3$ ):  $\delta = 29.4$ ; HRMS (ESI): Exact mass calcd for  $\text{C}_{38}\text{H}_{29}\text{O}_3\text{P}$   $[\text{M}+\text{H}]^+$ : 565.1927, Found: 565.1920.

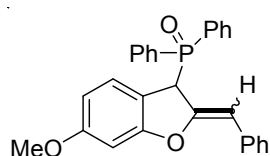

**4ar** (E/Z > 20:1)

Column chromatography afforded product **4ar** in 50% yield (65.8 mg) as white solid; Mp: 232-239 °C;  $^1\text{H}$  NMR (600 MHz,  $\text{CDCl}_3$ ):  $\delta = 7.84$ -7.81 (m, 2H), 7.50-7.44 (m, 3H), 7.42-7.37 (m, 3H), 7.34-7.30 (m, 3H), 7.29-7.25 (m, 2H), 7.19-7.16 (m, 3H), 6.96 (s, 1H), 6.843-6.840 (m, 1H), 6.78-6.76 (m, 1H), 5.02 (d,

$J = 11.4$  Hz, 1H), 3.77 (s, 3H);  $^{13}\text{C}\{^1\text{H}\}$  NMR (150 MHz,  $\text{CDCl}_3$ ):  $\delta = 157.7, 155.3, 151.8, 133.6$  (d,  $J_{\text{C-P}} = 4.5$  Hz), 132.0 (d,  $J_{\text{C-P}} = 13.5$  Hz), 131.7 (d,  $J_{\text{C-P}} = 33.0$  Hz), 131.3, 131.2 (d,  $J_{\text{C-P}} = 3.0$  Hz), 129.9 (d,  $J_{\text{C-P}} = 4.5$  Hz), 128.5 (d,  $J_{\text{C-P}} = 12.0$  Hz), 128.3, 128.1 (d,  $J_{\text{C-P}} = 10.5$  Hz), 127.4, 121.9, 121.0, 111.5, 106.4 (d,  $J_{\text{C-P}} = 4.5$  Hz), 95.7, 55.6, 47.8 (d,  $J_{\text{C-P}} = 66.0$  Hz);  $^{31}\text{P}\{^1\text{H}\}$  NMR (243 MHz,  $\text{CDCl}_3$ ):  $\delta = 30.2$ ; HRMS (ESI): Exact mass calcd for  $\text{C}_{28}\text{H}_{23}\text{O}_3\text{P}$   $[\text{M}+\text{H}]^+$ : 439.1458, Found: 439.1459.

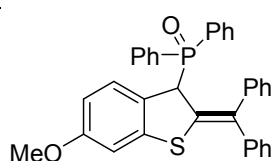

**4as**

Column chromatography afforded **4as** in 84% yield (133.7 mg) as white solid; Mp: 68-70 °C;  $^1\text{H}$  NMR (600 MHz,  $\text{CDCl}_3$ ):  $\delta = 7.58$ -7.55 (m, 2H), 7.53-7.48 (m, 3H), 7.42-7.39 (m, 3H), 7.32-7.26 (m, 5H), 7.23-7.21 (m, 1H), 7.20-7.17 (m, 2H), 7.14-7.13 (m, 2H), 6.74-6.73 (m, 2H), 6.66-6.65 (m, 1H), 6.52 (dd,  $J = 8.4$

Hz, 2.4 Hz, 1H), 6.40 (dd,  $J = 8.4$  Hz, 2.4 Hz, 1H), 5.62 (d,  $J = 12.6$  Hz, 1H), 3.70 (s, 3H);  $^{13}\text{C}\{^1\text{H}\}$  NMR (150 MHz,  $\text{CDCl}_3$ ):  $\delta = 159.9, 143.9$  (d,  $J_{\text{C-P}} = 3.0$  Hz), 142.0, 140.6, 138.7 (d,  $J_{\text{C-P}} = 10.5$  Hz), 134.8 (d,  $J_{\text{C-P}} = 10.5$  Hz), 132.1 (d,  $J_{\text{C-P}} = 7.5$  Hz), 131.8 (d,  $J_{\text{C-P}} = 15.0$  Hz), 131.6 (d,  $J_{\text{C-P}} = 13.5$  Hz), 131.2 (d,  $J_{\text{C-P}} = 96.0$  Hz), 129.8, 129.7 (d,  $J_{\text{C-P}} = 93.0$  Hz), 129.0 (d,  $J_{\text{C-P}} = 1.5$  Hz), 128.5, 128.3 (d,  $J_{\text{C-P}} = 10.5$  Hz), 128.2 (d,  $J_{\text{C-P}} = 10.5$  Hz), 128.0, 127.8, 127.0, 125.5, 124.7 (d,  $J_{\text{C-P}} = 7.5$  Hz), 110.4, 107.5, 55.4, 55.3 (d,  $J_{\text{C-P}} = 55.5$  Hz);  $^{31}\text{P}\{^1\text{H}\}$  NMR (243 MHz,  $\text{CDCl}_3$ ):  $\delta = 31.9$ ; HRMS (ESI): Exact mass calcd for  $\text{C}_{34}\text{H}_{27}\text{O}_2\text{PS}$   $[\text{M}+\text{H}]^+$ : 531.1542, Found: 531.1540.

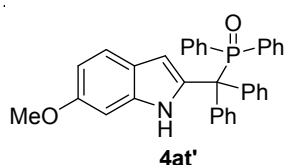

**4at'** was obtained in 36% yield (55.7 mg) as white solid; Mp: 104-106 °C; <sup>1</sup>H NMR (600 MHz, CDCl<sub>3</sub>): δ = 10.18 (brs, 1H), 7.47-7.44 (m, 2H), 7.38 (d, *J* = 8.4 Hz, 1H), 7.28-7.24 (m, 6H), 7.17-7.14 (m, 8H), 7.01-6.99 (m, 4H), 6.95-6.94 (m, 1H), 6.78 (dd, *J* = 8.4 Hz, 2.4 Hz, 1H), 6.19 (s, 1H), 3.87 (s, 3H); <sup>13</sup>C{<sup>1</sup>H} NMR (150 MHz, CDCl<sub>3</sub>): δ = 156.4, 139.1, 137.4, 137.0, 133.0 (d, *J*<sub>C-P</sub> = 9.0 Hz), 132.0 (d, *J*<sub>C-P</sub> = 3.0 Hz), 131.5, 130.9 (d, *J*<sub>C-P</sub> = 4.5 Hz), 128.2 (d, *J*<sub>C-P</sub> = 12.0 Hz), 127.9, 127.6, 121.3, 121.0, 109.9, 105.7 (d, *J*<sub>C-P</sub> = 6.0 Hz), 94.4, 60.9 (d, *J*<sub>C-P</sub> = 63.0 Hz), 55.5; <sup>31</sup>P{<sup>1</sup>H} NMR (243 MHz, CDCl<sub>3</sub>): δ = 36.8; HRMS (ESI): Exact mass calcd for C<sub>34</sub>H<sub>28</sub>NO<sub>2</sub>P [M+Na]<sup>+</sup>: 536.1750, Found: 536.1752.

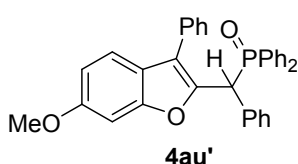

Column chromatography afforded **4au'** in 44% yield (67.0 mg) as white solid; Mp: 165-167 °C; <sup>1</sup>H NMR (600 MHz, CDCl<sub>3</sub>): δ = 7.60-7.58 (m, 2H), 7.53-7.50 (m, 2H), 7.47-7.40 (m, 5H), 7.39-7.36 (m, 2H), 7.29-7.26 (m, 3H), 7.25-7.22 (m, 5H), 7.17-7.16 (m, 2H), 7.132-7.129 (m, 1H), 6.80-6.78 (m, 1H), 5.08 (d, *J* = 13.2 Hz, 1H), 3.84 (s, 3H); <sup>13</sup>C{<sup>1</sup>H} NMR (150 MHz, CDCl<sub>3</sub>): δ = 157.9, 155.6, 147.2 (d, *J*<sub>C-P</sub> = 9.0 Hz), 133.8 (d, *J*<sub>C-P</sub> = 4.5 Hz), 132.0, 131.8, 131.6 (dd, *J*<sub>C-P</sub> = 7.5 Hz, 3.0 Hz), 131.3 (t, *J*<sub>C-P</sub> = 9.0 Hz), 131.1 (d, *J*<sub>C-P</sub> = 4.5 Hz), 130.5, 130.1 (d, *J*<sub>C-P</sub> = 4.5 Hz), 129.0, 128.9, 128.5, 128.1 (d, *J*<sub>C-P</sub> = 9.0 Hz), 128.0 (d, *J*<sub>C-P</sub> = 9.0 Hz), 127.6, 127.4 (d, *J*<sub>C-P</sub> = 1.5 Hz), 121.0, 120.0 (d, *J*<sub>C-P</sub> = 7.5 Hz), 119.7, 112.0, 96.0, 55.6, 46.8 (d, *J*<sub>C-P</sub> = 63.0 Hz); <sup>31</sup>P{<sup>1</sup>H} NMR (243 MHz, CDCl<sub>3</sub>): δ = 30.2; HRMS (ESI): Exact mass calcd for C<sub>34</sub>H<sub>27</sub>O<sub>3</sub>P [M+H]<sup>+</sup>: 515.1771, Found: 515.1776

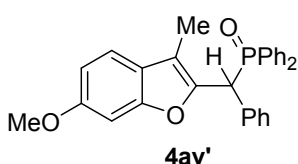

Column chromatography afforded **4av'** in 50% yield (67.8 mg) as white solid; Mp: 135-137 °C; <sup>1</sup>H NMR (600 MHz, CDCl<sub>3</sub>): δ = 7.71-7.68 (m, 2H), 7.65-7.62 (m, 2H), 7.54-7.52 (m, 2H), 7.43-7.40 (m, 2H), 7.34-7.31 (m, 4H), 7.23-7.16 (m, 4H), 6.98 (d, *J* = 2.4 Hz, 1H), 6.79 (dd, *J* = 8.4 Hz, 1.8 Hz, 1H), 5.00 (d, *J* = 13.8 Hz, 1H), 3.80 (s, 3H), 1.94 (d, *J* = 1.8 Hz, 3H); <sup>13</sup>C{<sup>1</sup>H} NMR (150 MHz, CDCl<sub>3</sub>): δ = 157.7, 155.1, 146.5 (d, *J*<sub>C-P</sub> = 9.0 Hz), 134.0 (d, *J*<sub>C-P</sub> = 4.5 Hz), 131.9 (d, *J*<sub>C-P</sub> = 13.5 Hz), 131.7 (d, *J*<sub>C-P</sub> = 3.0 Hz), 131.6 (d, *J*<sub>C-P</sub> = 3.0 Hz), 131.4 (d, *J*<sub>C-P</sub> = 7.5 Hz), 131.3, 131.2 (d, *J*<sub>C-P</sub> = 15.0 Hz), 130.6 (d, *J*<sub>C-P</sub> = 12.0 Hz), 130.1 (d, *J*<sub>C-P</sub> = 6.0 Hz), 128.9 (d, *J*<sub>C-P</sub> = 13.5 Hz), 128.3, 128.14, 128.13 (d, *J*<sub>C-P</sub> = 22.5 Hz),



127.3, 122.8, 119.1, 112.9 (d,  $J_{C-P} = 7.5$  Hz), 111.2, 95.9, 55.6, 47.3 (d,  $J_{C-P} = 63.0$  Hz), 8.01;  $^{31}\text{P}\{^1\text{H}\}$  NMR (243 MHz,  $\text{CDCl}_3$ ):  $\delta = 29.9$ ; HRMS (ESI): Exact mass calcd for  $\text{C}_{29}\text{H}_{25}\text{O}_3\text{P}$   $[\text{M}+\text{H}]^+$ : 453.1614, Found: 453.1606.

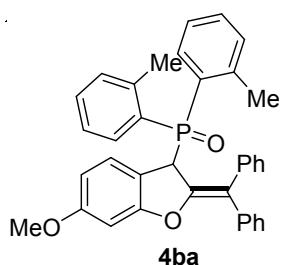

Column chromatography afforded **4ba** in 91% yield (148.1 mg) as white solid;

Mp: 161-163 °C;  $^1\text{H}$  NMR (600 MHz,  $\text{CDCl}_3$ ):  $\delta = 7.37$ -7.33 (m, 1H), 7.31-7.28 (m, 2H), 7.27-7.24 (m, 2H), 7.23-7.17 (m, 4H), 7.16-7.11 (m, 3H), 7.08-7.02 (m, 4H), 6.93-6.91 (m, 3H), 6.45-6.44 (m, 1H), 6.38 (dd,  $J = 9.0$  Hz, 2.4 Hz, 1H), 5.70 (d,  $J = 11.4$  Hz, 1H), 3.71 (s, 3H), 2.22 (s, 3H), 2.16 (s, 3H);  $^{13}\text{C}\{^1\text{H}\}$  NMR

(150 MHz,  $\text{CDCl}_3$ ):  $\delta = 160.9$  (d,  $J_{C-P} = 1.5$  Hz), 160.2 (d,  $J_{C-P} = 4.5$  Hz), 150.2 (d,  $J_{C-P} = 10.5$  Hz), 144.0 (d,  $J_{C-P} = 6.0$  Hz), 143.3 (d,  $J_{C-P} = 7.5$  Hz), 139.7 (d,  $J_{C-P} = 3.0$  Hz), 139.2 (d,  $J_{C-P} = 4.5$  Hz), 132.4 (d,  $J_{C-P} = 10.5$  Hz), 132.3 (d,  $J_{C-P} = 9.0$  Hz), 132.0 (d,  $J_{C-P} = 10.5$  Hz), 131.7 (d,  $J_{C-P} = 12.0$  Hz), 131.43 (d,  $J_{C-P} = 3.0$  Hz), 131.39 (d,  $J_{C-P} = 3.0$  Hz), 130.5 (d,  $J_{C-P} = 1.5$  Hz), 130.0 (d,  $J_{C-P} = 93.0$  Hz), 129.8 (d,  $J_{C-P} = 1.5$  Hz), 129.4 (d,  $J_{C-P} = 93.0$  Hz), 128.7, 127.6, 126.8 (d,  $J_{C-P} = 34.5$  Hz), 126.1 (d,  $J_{C-P} = 4.5$  Hz), 125.0 (d,  $J_{C-P} = 12.0$  Hz), 124.6 (d,  $J_{C-P} = 12.0$  Hz), 121.1 (d,  $J_{C-P} = 10.5$  Hz), 114.0 (d,  $J_{C-P} = 6.0$  Hz), 107.9 (d,  $J_{C-P} = 1.5$  Hz), 96.3 (d,  $J_{C-P} = 1.5$  Hz), 55.5, 46.6 (d,  $J_{C-P} = 57.0$  Hz), 21.6 (d,  $J_{C-P} = 3.0$  Hz), 21.3 (d,  $J_{C-P} = 3.0$  Hz);  $^{31}\text{P}\{^1\text{H}\}$  NMR (243 MHz,  $\text{CDCl}_3$ ):  $\delta = 36.0$ ; HRMS (ESI): Exact mass calcd for  $\text{C}_{36}\text{H}_{31}\text{O}_3\text{P}$   $[\text{M}+\text{H}]^+$ : 543.2084, Found: 543.2078.

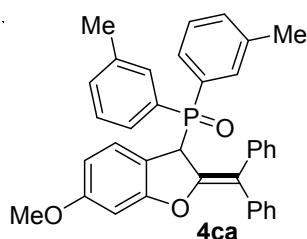

Column chromatography gave **4ca** in 80% yield (130.2 mg) as white solid;

Mp: 64-66 °C;  $^1\text{H}$  NMR (600 MHz,  $\text{CDCl}_3$ ):  $\delta = 7.44$ -7.40 (m, 2H), 7.28-7.26 (m, 2H), 7.25-7.23 (m, 3H), 7.22-7.20 (m, 4H), 7.19-7.18 (m, 2H), 7.16-7.13 (m, 1H), 7.10-7.08 (m, 2H), 6.89-6.88 (m, 2H), 6.71-6.69 (m, 1H), 6.35-6.34 (m, 2H), 5.51 (d,  $J = 15.0$  Hz, 1H), 3.70 (s, 3H), 2.29 (s, 3H), 2.27 (s, 3H);

$^{13}\text{C}\{^1\text{H}\}$  NMR (150 MHz,  $\text{CDCl}_3$ ):  $\delta = 160.8$ , 159.7 (d,  $J_{C-P} = 4.5$  Hz), 149.6 (d,  $J_{C-P} = 10.5$  Hz), 139.5 (d,  $J_{C-P} = 3.0$  Hz), 139.2 (d,  $J_{C-P} = 4.5$  Hz), 138.2 (d,  $J_{C-P} = 10.5$  Hz), 137.8 (d,  $J_{C-P} = 10.5$  Hz), 132.6, 132.3 (d,  $J_{C-P} = 7.5$  Hz), 132.1 (d,  $J_{C-P} = 7.5$  Hz), 130.3, 130.2 (d,  $J_{C-P} = 96.0$  Hz), 129.7, 129.5 (d,  $J_{C-P} = 97.5$  Hz), 128.6 (d,  $J_{C-P} = 9.0$  Hz), 128.42, 128.37, 128.03 (d,  $J_{C-P} = 9.0$  Hz), 127.95 (d,  $J_{C-P} = 9.0$  Hz), 127.6, 126.7, 126.6, 125.8 (d,  $J_{C-P} = 3.0$  Hz), 120.6 (d,  $J_{C-P} = 12.0$  Hz), 113.8 (d,  $J_{C-P} = 7.5$  Hz), 107.7, 96.1, 55.4,

47.4 (d,  $J_{C-P} = 58.5$  Hz), 21.4;  $^{31}\text{P}\{^1\text{H}\}$  NMR (243 MHz,  $\text{CDCl}_3$ ):  $\delta = 30.2$ ; HRMS (ESI): Exact mass calcd for  $\text{C}_{36}\text{H}_{31}\text{O}_3\text{P}$   $[\text{M}+\text{H}]^+$ : 543.2084, Found: 543.2081.

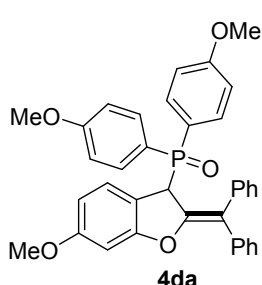

**4da** was obtained in 66% yield (111.8 mg) as white solid; Mp: 84-86 °C;  $^1\text{H}$  NMR (600 MHz,  $\text{CDCl}_3$ ):  $\delta = 7.56-7.52$  (m, 2H), 7.35-7.32 (m, 2H), 7.27-7.25 (m, 2H), 7.20-7.19 (m, 3H), 7.15-7.14 (m, 1H), 7.13-7.11 (m, 2H), 6.92-6.91 (m, 2H), 6.82-6.80 (m, 2H), 6.77-6.75 (m, 3H), 6.37-6.36 (m, 1H), 6.34-6.33 (m, 1H), 5.48 (d,  $J = 15.6$  Hz, 1H), 3.825 (s, 3H), 3.823 (s, 3H), 3.70 (s, 3H);  $^{13}\text{C}\{^1\text{H}\}$

NMR (150 MHz,  $\text{CDCl}_3$ ):  $\delta = 162.2$  (d,  $J_{C-P} = 24.0$  Hz), 160.8, 159.6 (d,  $J_{C-P} = 4.5$  Hz), 149.8 (d,  $J_{C-P} = 10.5$  Hz), 140.0, 139.4 (d,  $J_{C-P} = 3.0$  Hz), 133.4 (d,  $J_{C-P} = 10.5$  Hz), 133.2 (d,  $J_{C-P} = 10.5$  Hz), 130.0 (d,  $J_{C-P} = 78.0$  Hz), 128.4, 127.6, 126.6 (d,  $J_{C-P} = 3.0$  Hz), 125.8, 122.1, 121.3 (d,  $J_{C-P} = 42.0$  Hz), 120.4 (d,  $J_{C-P} = 10.5$  Hz), 114.1, 114.0 (d,  $J_{C-P} = 13.5$  Hz), 113.8 (d,  $J_{C-P} = 12.0$  Hz), 107.7, 96.1, 55.4, 55.2, 47.6 (d,  $J_{C-P} = 60.0$  Hz);  $^{31}\text{P}\{^1\text{H}\}$  NMR (243 MHz,  $\text{CDCl}_3$ ):  $\delta = 28.9$ ; HRMS (ESI): Exact mass calcd for  $\text{C}_{36}\text{H}_{31}\text{O}_5\text{P}$   $[\text{M}+\text{H}]^+$ : 575.1982, Found: 575.1976.

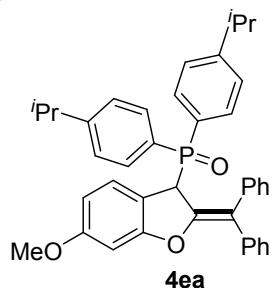

Column chromatography afforded the desired product **4ea** in 72% yield (129.3 mg) as white solid; Mp: 150-152 °C;  $^1\text{H}$  NMR (600 MHz,  $\text{CDCl}_3$ ):  $\delta = 7.53-7.50$  (m, 2H), 7.38-7.34 (m, 2H), 7.26-7.23 (m, 2H), 7.20-7.17 (m, 2H), 7.16-7.13 (m, 6H), 7.12-7.09 (m, 2H), 6.91-6.90 (m, 2H), 6.66-6.64 (m, 1H), 6.33-6.32 (m, 2H), 5.49 (d,  $J = 15.0$  Hz, 1H), 3.70 (s, 3H), 2.94-2.87 (m, 2H), 1.26-1.24 (m, 12H);

$^{13}\text{C}\{^1\text{H}\}$  NMR (150 MHz,  $\text{CDCl}_3$ ):  $\delta = 160.8$  (d,  $J_{C-P} = 3.0$  Hz), 159.7 (d,  $J_{C-P} = 4.5$  Hz), 152.65 (d,  $J_{C-P} = 3.0$  Hz), 152.57 (d,  $J_{C-P} = 3.0$  Hz), 149.9 (d,  $J_{C-P} = 10.5$  Hz), 139.8 (d,  $J_{C-P} = 3.0$  Hz), 139.4 (d,  $J_{C-P} = 4.5$  Hz), 131.7 (d,  $J_{C-P} = 9.0$  Hz), 131.6 (d,  $J_{C-P} = 10.5$  Hz), 130.4 (d,  $J_{C-P} = 3.0$  Hz), 129.8 (d,  $J_{C-P} = 1.5$  Hz), 128.5, 128.1, 127.6, 127.4 (d,  $J_{C-P} = 22.5$  Hz), 126.7 (d,  $J_{C-P} = 3.0$  Hz), 126.5 (d,  $J_{C-P} = 12.0$  Hz), 126.3 (d,  $J_{C-P} = 10.5$  Hz), 125.9 (d,  $J_{C-P} = 3.0$  Hz), 120.5 (d,  $J_{C-P} = 10.5$  Hz), 114.0 (d,  $J_{C-P} = 7.5$  Hz), 107.7 (d,  $J_{C-P} = 1.5$  Hz), 96.0, 55.4, 47.6 (d,  $J_{C-P} = 58.5$  Hz), 34.1, 23.71, 23.68, 23.6;  $^{31}\text{P}\{^1\text{H}\}$  NMR (243 MHz,  $\text{CDCl}_3$ ):  $\delta = 29.2$ ; HRMS (ESI): Exact mass calcd for  $\text{C}_{40}\text{H}_{39}\text{O}_3\text{P}$   $[\text{M}+\text{H}]^+$ : 599.2710, Found: 599.2708.

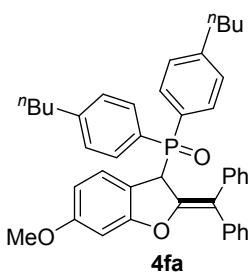

Column chromatography afforded product **4fa** in 88% yield (165.5 mg) as white solid; Mp: 154-156 °C;  $^1\text{H}$  NMR (600 MHz,  $\text{CDCl}_3$ ):  $\delta$  = 7.52-7.49 (m, 2H), 7.35-7.32 (m, 2H), 7.26-7.24 (m, 2H), 7.20-7.15 (m, 4H), 7.12-7.08 (m, 6H), 6.91-6.90 (m, 2H), 6.67-6.65 (m, 1H), 6.34-6.32 (m, 2H), 5.50 (d,  $J$  = 15.0 Hz, 1H), 3.70 (s, 3H), 2.63-2.60 (m, 4H), 1.62-1.56 (m, 4H), 1.39-1.31 (m, 4H), 0.95-

0.92 (m, 6H);  $^{13}\text{C}\{^1\text{H}\}$  NMR (150 MHz,  $\text{CDCl}_3$ ):  $\delta$  = 160.8 (d,  $J_{\text{C-P}}$  = 3.0 Hz), 159.7 (d,  $J_{\text{C-P}}$  = 3.0 Hz), 149.8 (d,  $J_{\text{C-P}}$  = 10.5 Hz), 146.9 (d,  $J_{\text{C-P}}$  = 3.0 Hz), 146.8 (d,  $J_{\text{C-P}}$  = 3.0 Hz), 139.9 (d,  $J_{\text{C-P}}$  = 4.5 Hz), 139.4 (d,  $J_{\text{C-P}}$  = 4.5 Hz), 131.6 (d,  $J_{\text{C-P}}$  = 9.0 Hz), 131.5 (d,  $J_{\text{C-P}}$  = 10.5 Hz), 130.4 (d,  $J_{\text{C-P}}$  = 1.5 Hz), 129.8 (d,  $J_{\text{C-P}}$  = 1.5 Hz), 128.44, 128.36, 128.2 (d,  $J_{\text{C-P}}$  = 12.0 Hz), 127.6, 127.4 (d,  $J_{\text{C-P}}$  = 97.5 Hz), 126.8 (d,  $J_{\text{C-P}}$  = 99.0 Hz), 126.6, 125.8 (d,  $J_{\text{C-P}}$  = 3.0 Hz), 120.5 (d,  $J_{\text{C-P}}$  = 10.5 Hz), 114.0 (d,  $J_{\text{C-P}}$  = 7.5 Hz), 107.7, 96.1, 55.4, 47.6 (d,  $J_{\text{C-P}}$  = 58.5 Hz), 35.6, 33.2, 22.3, 22.2, 13.9;  $^{31}\text{P}\{^1\text{H}\}$  NMR (243 MHz,  $\text{CDCl}_3$ ):  $\delta$  = 30.1; HRMS (ESI): Exact mass calcd for  $\text{C}_{42}\text{H}_{43}\text{O}_3\text{P}$  [ $\text{M}+\text{H}$ ] $^+$ : 627.3023, Found: 627.3022.

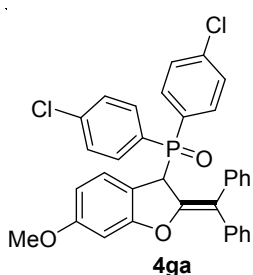

Column chromatography afforded the product **4ga** in 87% yield (152.3 mg) as white solid; Mp: 204-206 °C;  $^1\text{H}$  NMR (600 MHz,  $\text{CDCl}_3$ ):  $\delta$  = 7.57-7.54 (m, 2H), 7.37-7.34 (m, 2H), 7.30-7.28 (m, 3H), 7.27-7.22 (m, 4H), 7.21-7.18 (m, 3H), 7.15-7.13 (m, 2H), 6.87-6.86 (m, 2H), 6.80-6.78 (m, 1H), 6.39-6.36 (m, 2H), 5.55 (d,  $J$  = 15.6 Hz, 1H), 3.70 (s, 3H);  $^{13}\text{C}\{^1\text{H}\}$  NMR (150 MHz,  $\text{CDCl}_3$ ):  $\delta$  = 161.2 (d,  $J_{\text{C-P}}$  = 3.0 Hz), 159.6 (d,  $J_{\text{C-P}}$  = 4.5 Hz), 148.8 (d,  $J_{\text{C-P}}$  = 10.5 Hz), 139.6 (d,  $J_{\text{C-P}}$  = 4.5 Hz), 139.0 (d,  $J_{\text{C-P}}$  = 4.5 Hz), 138.7 (d,  $J_{\text{C-P}}$  = 4.5 Hz), 138.6 (d,  $J_{\text{C-P}}$  = 3.0 Hz), 132.8 (d,  $J_{\text{C-P}}$  = 9.0 Hz), 132.6 (d,  $J_{\text{C-P}}$  = 10.5 Hz), 130.2 (d,  $J_{\text{C-P}}$  = 1.5 Hz), 129.7 (d,  $J_{\text{C-P}}$  = 3.0 Hz), 129.2, 128.8 (d,  $J_{\text{C-P}}$  = 12.0 Hz), 128.7, 128.6, 127.83, 127.78, 127.2, 126.9 (d,  $J_{\text{C-P}}$  = 16.5 Hz), 125.9 (d,  $J_{\text{C-P}}$  = 3.0 Hz), 121.1 (d,  $J_{\text{C-P}}$  = 12.0 Hz), 112.9 (d,  $J_{\text{C-P}}$  = 7.5 Hz), 108.1 (d,  $J_{\text{C-P}}$  = 3.0 Hz), 96.3 (d,  $J_{\text{C-P}}$  = 1.5 Hz), 55.5, 47.3 (d,  $J_{\text{C-P}}$  = 61.5 Hz);  $^{31}\text{P}\{^1\text{H}\}$  NMR (243 MHz,  $\text{CDCl}_3$ ):  $\delta$  = 27.3; HRMS (ESI): Exact mass calcd for  $\text{C}_{34}\text{H}_{25}\text{Cl}_2\text{O}_3\text{P}$  [ $\text{M}+\text{H}$ ] $^+$ : 583.0991, Found: 583.0993.

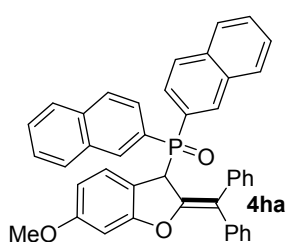

Column chromatography afforded product **4ha** in 85% yield (156.7 mg) as white solid; Mp: 118-120 °C;  $^1\text{H}$  NMR (600 MHz,  $\text{CDCl}_3$ ):  $\delta$  = 8.27-8.24 (m, 1H), 8.16-8.14 (m, 1H), 7.85-7.84 (m, 2H), 7.81-7.79 (m, 1H), 7.78-7.76 (m, 3H), 7.75-7.72 (m, 1H), 7.60-7.57 (m, 2H), 7.53-7.49 (m, 3H), 7.25-7.22 (m,

4H), 7.20-7.15 (m, 1H), 6.91-6.88 (m, 1H), 6.78-6.74 (m, 5H), 6.341-6.338 (m, 1H), 6.30-6.29 (m, 1H), 5.76 (d,  $J = 15.0$  Hz, 1H), 3.65 (s, 3H);  $^{13}\text{C}\{^1\text{H}\}$  NMR (150 MHz,  $\text{CDCl}_3$ ):  $\delta = 161.0$  (d,  $J_{\text{C-P}} = 3.0$  Hz), 159.8 (d,  $J_{\text{C-P}} = 4.5$  Hz), 149.5 (d,  $J_{\text{C-P}} = 10.5$  Hz), 139.4 (d,  $J_{\text{C-P}} = 4.5$  Hz), 139.2 (d,  $J_{\text{C-P}} = 4.5$  Hz), 134.6 (d,  $J_{\text{C-P}} = 4.5$  Hz), 134.0 (d,  $J_{\text{C-P}} = 7.5$  Hz), 130.1 (d,  $J_{\text{C-P}} = 1.5$  Hz), 129.8 (d,  $J_{\text{C-P}} = 3.0$  Hz), 129.0 (d,  $J_{\text{C-P}} = 10.5$  Hz), 128.3 (d,  $J_{\text{C-P}} = 7.5$  Hz), 128.2 (d,  $J_{\text{C-P}} = 3.0$  Hz), 128.1 (d,  $J_{\text{C-P}} = 10.5$  Hz), 127.9 (d,  $J_{\text{C-P}} = 10.5$  Hz), 127.7, 127.5, 126.83, 126.76, 126.6 (d,  $J_{\text{C-P}} = 10.5$  Hz), 126.1 (d,  $J_{\text{C-P}} = 10.5$  Hz), 126.0 (d,  $J_{\text{C-P}} = 10.5$  Hz), 125.8 (d,  $J_{\text{C-P}} = 3.0$  Hz), 120.9 (d,  $J_{\text{C-P}} = 10.5$  Hz), 113.6 (d,  $J_{\text{C-P}} = 7.5$  Hz), 108.0, 96.3 (d,  $J_{\text{C-P}} = 1.5$  Hz), 55.4, 47.5 (d,  $J_{\text{C-P}} = 58.5$  Hz);  $^{31}\text{P}\{^1\text{H}\}$  NMR (243 MHz,  $\text{CDCl}_3$ ):  $\delta = 29.1$ ; HRMS (ESI): Exact mass calcd for  $\text{C}_{42}\text{H}_{31}\text{O}_3\text{P}$   $[\text{M}+\text{H}]^+$ : 615.2084, Found: 615.2076.

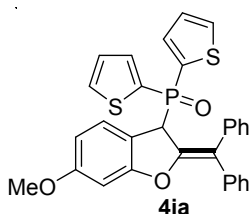

Column chromatography afforded the product **4ia** in 40% yield (63.2 mg) as white solid; Mp: 204-206 °C;  $^1\text{H}$  NMR (600 MHz,  $\text{CDCl}_3$ ):  $\delta = 7.67$ -7.65 (m, 1H), 7.61-7.60 (m, 1H), 7.49-7.48 (m, 1H), 7.29-7.27 (m, 1H), 7.261-7.255 (m, 1H), 7.24-7.20 (m, 4H), 7.18-7.16 (m, 3H), 7.10-7.09 (m, 1H), 7.02-6.99 (m, 3H), 6.88-6.86 (m, 1H), 6.43 (dd,  $J = 8.4$  Hz, 2.4 Hz, 1H), 6.330-6.326 (m, 1H), 5.48 (d,  $J = 19.2$  Hz, 1H), 3.71 (s, 3H);  $^{13}\text{C}\{^1\text{H}\}$  NMR (150 MHz,  $\text{CDCl}_3$ ):  $\delta = 161.2$  (d,  $J_{\text{C-P}} = 3.0$  Hz), 159.8 (d,  $J_{\text{C-P}} = 4.5$  Hz), 148.7 (d,  $J_{\text{C-P}} = 12.0$  Hz), 139.6 (d,  $J_{\text{C-P}} = 4.5$  Hz), 139.2 (d,  $J_{\text{C-P}} = 6.0$  Hz), 136.4 (d,  $J_{\text{C-P}} = 10.5$  Hz), 136.2 (d,  $J_{\text{C-P}} = 9.0$  Hz), 133.98 (d,  $J_{\text{C-P}} = 4.5$  Hz), 133.96 (d,  $J_{\text{C-P}} = 4.5$  Hz), 131.0 (d,  $J_{\text{C-P}} = 61.5$  Hz), 130.32 (d,  $J_{\text{C-P}} = 3.0$  Hz), 130.27 ( $J_{\text{C-P}} = 63.0$  Hz), 129.8 (d,  $J_{\text{C-P}} = 3.0$  Hz), 128.6, 128.5 (d,  $J_{\text{C-P}} = 13.5$  Hz), 128.0 (d,  $J_{\text{C-P}} = 15.0$  Hz), 127.7, 126.8 (d,  $J_{\text{C-P}} = 24.0$  Hz), 126.1 (d,  $J_{\text{C-P}} = 3.0$  Hz), 121.8 (d,  $J_{\text{C-P}} = 13.5$  Hz), 113.3 (d,  $J_{\text{C-P}} = 7.5$  Hz), 107.9 (d,  $J_{\text{C-P}} = 3.0$  Hz), 96.2 (d,  $J_{\text{C-P}} = 3.0$  Hz), 55.5, 50.0 (d,  $J_{\text{C-P}} = 69.0$  Hz);  $^{31}\text{P}\{^1\text{H}\}$  NMR (243 MHz,  $\text{CDCl}_3$ ):  $\delta = 18.9$ ; HRMS (ESI): Exact mass calcd for  $\text{C}_{30}\text{H}_{23}\text{O}_3\text{PS}_2$   $[\text{M}+\text{H}]^+$ : 527.0899, Found: 527.0893.

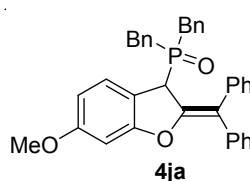

Column chromatography afforded the desired product **4ja** in 63% yield (102.5 mg) as white solid; Mp: 184-186 °C;  $^1\text{H}$  NMR (600 MHz,  $\text{CDCl}_3$ ):  $\delta = 7.45$ -7.40 (m, 4H), 7.37-7.36 (m, 4H), 7.35-7.33 (m, 1H), 7.30-7.28 (m, 1H), 7.21-7.19 (m, 1H), 7.18-7.16 (m, 3H), 7.09-7.07 (m, 3H), 6.96-6.94 (m, 2H), 6.86-6.85 (m, 2H), 6.52-6.50 (m, 1H), 6.434-6.430 (m, 1H), 5.14 (d,  $J = 17.4$  Hz, 1H), 3.76 (s, 3H), 2.98 (d,  $J = 12.6$  Hz, 2H), 2.55 (ABd,  $J = 15.0$  Hz, 9.0 Hz, 1H), 2.36 (ABd,  $J = 15.0$  Hz, 9.0 Hz, 1H);  $^{13}\text{C}\{^1\text{H}\}$  NMR (150 MHz,

CDCl<sub>3</sub>):  $\delta$  = 161.0, 159.0 (d,  $J_{C-P}$  = 4.5 Hz), 150.1 (d,  $J_{C-P}$  = 7.5 Hz), 140.1 (d,  $J_{C-P}$  = 3.0 Hz), 138.9 (d,  $J_{C-P}$  = 3.0 Hz), 131.3 (d,  $J_{C-P}$  = 9.0 Hz), 131.0 (d,  $J_{C-P}$  = 6.0 Hz), 130.8 (d,  $J_{C-P}$  = 1.5 Hz), 130.0 (d,  $J_{C-P}$  = 4.5 Hz), 129.9 (d,  $J_{C-P}$  = 1.5 Hz), 129.7 (d,  $J_{C-P}$  = 6.0 Hz), 129.4, 128.3 (d,  $J_{C-P}$  = 18.0 Hz), 127.9, 127.0, 126.74 (d,  $J_{C-P}$  = 3.0 Hz), 126.69 (d,  $J_{C-P}$  = 3.0 Hz), 126.4 (d,  $J_{C-P}$  = 1.5 Hz), 120.2 (d,  $J_{C-P}$  = 10.5 Hz), 113.7 (d,  $J_{C-P}$  = 7.5 Hz), 108.3, 96.4 (d,  $J_{C-P}$  = 1.5 Hz), 55.5, 46.0 (d,  $J_{C-P}$  = 52.5 Hz), 35.1 (d,  $J_{C-P}$  = 58.5 Hz), 32.7 (d,  $J_{C-P}$  = 60.0 Hz); <sup>31</sup>P{<sup>1</sup>H} NMR (243 MHz, CDCl<sub>3</sub>):  $\delta$  = 42.3; HRMS (ESI): Exact mass calcd for C<sub>36</sub>H<sub>31</sub>O<sub>3</sub>P [M+H]<sup>+</sup>: 543.2084, Found: 543.2081.

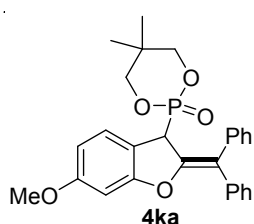

**4ka** was obtained in 33% yield (45.7 mg) as white solid; Mp: 54-56 °C; <sup>1</sup>H NMR (600 MHz, CDCl<sub>3</sub>):  $\delta$  = 7.42-7.40 (m, 2H), 7.38-7.35 (m, 2H), 7.33-7.29 (m, 5H), 7.26-7.23 (m, 2H), 6.56-6.55 (m, 2H), 5.04 (d,  $J$  = 25.2 Hz, 1H), 4.01 (t,  $J$  = 10.2 Hz, 1H), 3.77 (s, 3H), 3.75-3.73 (m, 1H), 3.69 (t,  $J$  = 12.0 Hz, 1H), 3.25-3.21 (m, 1H), 0.932 (s, 3H), 0.928 (s, 3H); <sup>13</sup>C{<sup>1</sup>H} NMR (150 MHz, CDCl<sub>3</sub>):  $\delta$  = 161.1, 159.6 (d,  $J_{C-P}$  = 6.0 Hz), 148.4 (d,  $J_{C-P}$  = 13.5 Hz), 140.2 (d,  $J_{C-P}$  = 4.5 Hz), 138.8 (d,  $J_{C-P}$  = 6.0 Hz), 130.2 (d,  $J_{C-P}$  = 115.5 Hz), 128.2 (d,  $J_{C-P}$  = 121.5 Hz), 127.0 (d,  $J_{C-P}$  = 52.5 Hz), 125.5 (d,  $J_{C-P}$  = 3.0 Hz), 120.2 (d,  $J_{C-P}$  = 12.0 Hz), 112.7 (d,  $J_{C-P}$  = 9.0 Hz), 108.3, 96.7, 76.0 (d,  $J_{C-P}$  = 6.0 Hz), 75.7 (d,  $J_{C-P}$  = 6.0 Hz), 75.2 (d,  $J_{C-P}$  = 6.0 Hz), 55.5, 42.0 (d,  $J_{C-P}$  = 135.0 Hz), 32.3, 32.2, 21.43, 21.36; <sup>31</sup>P{<sup>1</sup>H} NMR (243 MHz, CDCl<sub>3</sub>):  $\delta$  = 15.6; HRMS (ESI): Exact mass calcd for C<sub>27</sub>H<sub>27</sub>O<sub>5</sub>P [M+H]<sup>+</sup>: 463.1669, Found: 463.1663.

#### 4. General procedure for tandem dearomative C3-phosphorylation/aromatization

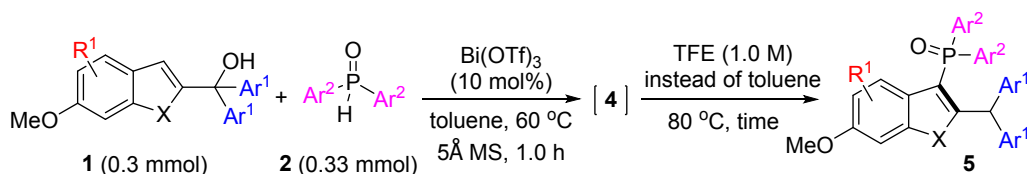

The reaction was carried out under an air atmosphere. To a 25-mL Schlenk tube were added alcohols **1** (0.3 mmol, 1.0 equiv), Ar<sub>2</sub>P(O)H **2** (0.33 mmol, 2.0 equivs), Bi(OTf)<sub>3</sub> (19.7 mg, 10 mol%) and 300 mg 5 Å MS. After adding 3.0 mL of anhydrous toluene, the reaction mixture was stirred at 60 °C till almost full conversion of **1** by TLC analysis. Then, toluene was removed under vacuum and TFE (3.0

mL) was added. After stirring at 80 °C for indicated time in the main text, the reaction mixture was directly subjected to column chromatography using petrol ether/ethyl acetate (generally 4:1, v:v) as the eluent to afford products **5**.

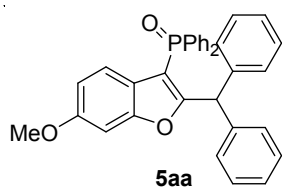

Column chromatography afforded the desired product **5aa** in 78% yield (120.4 mg) as white solid; Mp: 54-56 °C; <sup>1</sup>H NMR (600 MHz, CDCl<sub>3</sub>): δ = 7.70-7.66 (m, 4H), 7.54-7.51 (m, 2H), 7.42-7.39 (m, 4H), 7.25-7.19 (m, 10H), 7.00 (s, 1H), 6.66-6.61 (m, 2H), 6.29 (s, 1H), 3.76 (s, 3H); <sup>13</sup>C{<sup>1</sup>H} NMR (150 MHz, CDCl<sub>3</sub>):

δ = 165.4 (d, *J*<sub>C-P</sub> = 16.5 Hz), 157.9, 155.6 (d, *J*<sub>C-P</sub> = 12.0 Hz), 140.7, 132.9 (d, *J*<sub>C-P</sub> = 108.0 Hz), 132.1, 131.7 (d, *J*<sub>C-P</sub> = 10.5 Hz), 129.1, 128.6 (d, *J*<sub>C-P</sub> = 13.5 Hz), 128.2, 126.6, 121.4, 121.2 (d, *J*<sub>C-P</sub> = 10.5 Hz), 112.4, 107.1 (d, *J*<sub>C-P</sub> = 118.5 Hz), 96.0, 55.6, 48.8; <sup>31</sup>P{<sup>1</sup>H} NMR (243 MHz, CDCl<sub>3</sub>): δ = 22.0; HRMS (ESI): Exact mass calcd for C<sub>34</sub>H<sub>27</sub>O<sub>3</sub>P [M+H]<sup>+</sup>: 515.1771, Found: 515.1768.

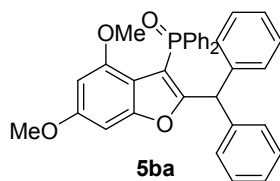

Column chromatography afforded the desired product **5ba** in 76% yield (124.2 mg) as white solid; Mp: 224-226 °C; <sup>1</sup>H NMR (600 MHz, CDCl<sub>3</sub>): δ = 7.71-7.67 (m, 4H), 7.48-7.45 (m, 2H), 7.39-7.36 (m, 4H), 7.30-7.28 (m, 4H), 7.27-7.24 (m, 4H), 7.21-7.19 (m, 2H), 6.88 (s, 1H), 6.65-6.64 (m, 1H), 6.13 (d,

*J* = 2.4 Hz, 1H), 3.77 (s, 3H), 3.12 (s, 3H); <sup>13</sup>C{<sup>1</sup>H} NMR (150 MHz, CDCl<sub>3</sub>): δ = 165.5 (d, *J*<sub>C-P</sub> = 16.5 Hz), 159.3, 156.4 (d, *J*<sub>C-P</sub> = 10.5 Hz), 153.1, 141.5, 134.4 (d, *J*<sub>C-P</sub> = 111.0 Hz), 131.5 (d, *J*<sub>C-P</sub> = 10.5 Hz), 131.3, 129.2, 128.2, 128.0 (d, *J*<sub>C-P</sub> = 13.5 Hz), 126.5, 111.3 (d, *J*<sub>C-P</sub> = 9.0 Hz), 105.5 (d, *J*<sub>C-P</sub> = 115.5 Hz), 95.0, 88.4, 55.7, 54.2, 48.2; <sup>31</sup>P{<sup>1</sup>H} NMR (243 MHz, CDCl<sub>3</sub>): δ = 25.4; HRMS (ESI): Exact mass calcd for C<sub>33</sub>H<sub>29</sub>O<sub>4</sub>P [M+H]<sup>+</sup>: 545.1876, Found: 545.1880.

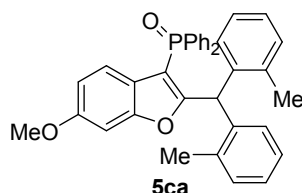

Column chromatography afforded the desired product **5ca** in 85% yield (138.4 mg) as white solid; Mp: 210-212 °C; <sup>1</sup>H NMR (600 MHz, CDCl<sub>3</sub>): δ = 7.60-7.57 (m, 4H), 7.49-7.46 (m, 2H), 7.35-7.32 (m, 4H), 7.14-7.09 (m, 4H), 7.06-7.03 (m, 2H), 6.993-6.991 (m, 1H), 6.93-6.92 (m, 2H), 6.68-6.66 (m, 1H), 6.62-6.60 (m, 2H), 3.76 (s, 3H), 2.16 (s, 6H); <sup>13</sup>C{<sup>1</sup>H} NMR (150 MHz,

CDCl<sub>3</sub>): δ = 165.5 (d, *J*<sub>C-P</sub> = 18.0 Hz), 157.8, 155.4 (d, *J*<sub>C-P</sub> = 12.0 Hz), 139.2, 136.8, 132.7 (d, *J*<sub>C-P</sub> = 109.5 Hz), 131.9, 131.5 (d, *J*<sub>C-P</sub> = 10.5 Hz), 130.2, 128.8, 128.4 (d, *J*<sub>C-P</sub> = 13.5 Hz), 126.7, 125.6, 121.4,

121.3, 112.6, 106.0 (d,  $J_{C-P} = 117.0$  Hz), 96.0, 55.6, 43.9, 19.7;  $^{31}\text{P}\{^1\text{H}\}$  NMR (243 MHz,  $\text{CDCl}_3$ ):  $\delta = 21.2$ ; HRMS (ESI): Exact mass calcd for  $\text{C}_{36}\text{H}_{31}\text{O}_3\text{P}$   $[\text{M}+\text{H}]^+$ : 543.2084, Found: 543.2089.

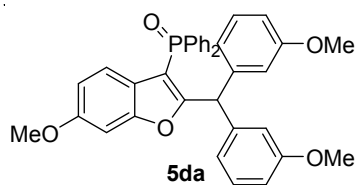

Column chromatography afforded the desired product **5da** in 84% yield (144.8 mg) as white solid; Mp: 79-81 °C;  $^1\text{H}$  NMR (600 MHz,  $\text{CDCl}_3$ ):  $\delta = 7.70$ -7.67 (m, 4H), 7.54-7.52 (m, 2H), 7.43-7.40 (m, 4H), 7.15 (t,  $J = 7.8$  Hz, 2H), 7.014-7.009 (m, 1H), 6.82-6.81 (m, 2H), 6.77-6.76 (m, 2H),

6.75-6.73 (m, 2H), 6.66-6.64 (m, 1H), 6.61-6.60 (m, 1H), 6.26 (s, 1H), 3.77 (s, 3H), 3.69 (s, 6H);  $^{13}\text{C}\{^1\text{H}\}$  NMR (150 MHz,  $\text{CDCl}_3$ ):  $\delta = 165.2$  (d,  $J_{C-P} = 18.0$  Hz), 159.4, 158.0, 155.6 (d,  $J_{C-P} = 10.5$  Hz), 142.0, 132.9 (d,  $J_{C-P} = 108.0$  Hz), 132.1, 131.7 (d,  $J_{C-P} = 10.5$  Hz), 129.2, 128.6 (d,  $J_{C-P} = 12.0$  Hz), 121.5, 121.4, 121.2 (d,  $J_{C-P} = 9.0$  Hz), 114.9, 112.5, 112.1, 107.1 (d,  $J_{C-P} = 117.0$  Hz), 96.0, 55.6, 55.1, 48.8;  $^{31}\text{P}\{^1\text{H}\}$  NMR (243 MHz,  $\text{CDCl}_3$ ):  $\delta = 22.1$ ; HRMS (ESI): Exact mass calcd for  $\text{C}_{36}\text{H}_{31}\text{O}_5\text{P}$   $[\text{M}+\text{H}]^+$ : 575.1982, Found: 575.1985.

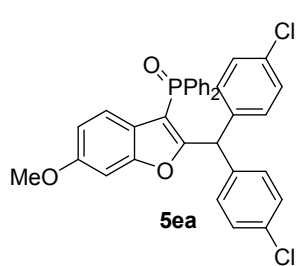

Column chromatography afforded **5ea** in 56% yield (98.0 mg) as white solid; Mp: 132-134 °C;  $^1\text{H}$  NMR (600 MHz,  $\text{CDCl}_3$ ):  $\delta = 7.69$ -7.65 (m, 4H), 7.57-7.54 (m, 2H), 7.44-7.41 (m, 4H), 7.21 (AB,  $J = 8.4$  Hz, 4H), 7.14 (AB,  $J = 8.4$  Hz, 4H), 7.00 (t,  $J = 1.8$  Hz, 1H), 6.66 (dd,  $J = 8.4$  Hz, 2.4 Hz, 1H), 6.50-6.47 (m, 2H), 3.78 (s, 3H);  $^{13}\text{C}\{^1\text{H}\}$  NMR (150 MHz,  $\text{CDCl}_3$ ):  $\delta = 164.5$  (d,  $J_{C-P} =$

18.0 Hz), 158.1, 155.6 (d,  $J_{C-P} = 12.0$  Hz), 138.8, 133.0, 132.7, 132.3 (d,  $J_{C-P} = 1.5$  Hz), 131.6 (d,  $J_{C-P} = 10.5$  Hz), 130.3, 128.7 (d,  $J_{C-P} = 12.0$  Hz), 128.5, 121.3, 120.8 (d,  $J_{C-P} = 10.5$  Hz), 112.7, 107.6 (d,  $J_{C-P} = 115.5$  Hz), 96.0, 55.6, 47.6;  $^{31}\text{P}\{^1\text{H}\}$  NMR (243 MHz,  $\text{CDCl}_3$ ):  $\delta = 21.5$ ; HRMS (ESI): Exact mass calcd for  $\text{C}_{34}\text{H}_{25}\text{Cl}_2\text{O}_3\text{P}$   $[\text{M}+\text{H}]^+$ : 583.0991, Found: 583.0993.

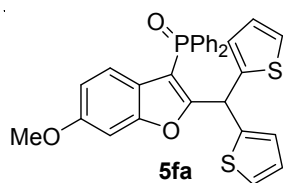

Column chromatography afforded product **5fa** in 73% yield (115.3 mg) as lilac solid; Mp: 119-121 °C;  $^1\text{H}$  NMR (400 MHz,  $\text{CDCl}_3$ ):  $\delta = 7.74$ -7.71 (m, 4H), 7.57-7.55 (m, 2H), 7.47-7.44 (m, 4H), 7.18 (dd,  $J = 4.8$  Hz, 1.2 Hz, 2H), 7.06 (d,  $J = 1.8$  Hz, 1H), 6.96-6.95 (m, 2H), 6.90-6.89 (m, 2H), 6.82 (s, 1H), 6.67 (d,  $J =$

2.4 Hz, 2H), 3.78 (s, 3H);  $^{13}\text{C}\{^1\text{H}\}$  NMR (150 MHz,  $\text{CDCl}_3$ ):  $\delta = 163.5$  (d,  $J_{C-P} = 18.0$  Hz), 158.2, 155.5 (d,  $J_{C-P} = 12.0$  Hz), 143.1, 132.6 (d,  $J_{C-P} = 109.5$  Hz), 132.3 (d,  $J_{C-P} = 1.5$  Hz), 131.7 (d,  $J_{C-P} = 10.5$  Hz),

128.7 (d,  $J_{C-P} = 12.0$  Hz), 126.5 (d,  $J_{C-P} = 10.5$  Hz), 125.0, 121.6, 120.9 (d,  $J_{C-P} = 10.5$  Hz), 112.8, 106.3 (d,  $J_{C-P} = 117.0$  Hz), 96.0, 55.6, 39.7;  $^{31}\text{P}\{^1\text{H}\}$  NMR (243 MHz,  $\text{CDCl}_3$ ):  $\delta = 21.4$ ; HRMS (ESI): Exact mass calcd for  $\text{C}_{30}\text{H}_{23}\text{O}_3\text{PS}_2$   $[\text{M}+\text{H}]^+$ : 527.0899, Found: 527.0904.

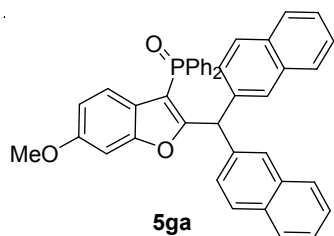

Product **5ga** was obtained in 80% yield (147.5 mg) as white solid; Mp: 196-198 °C;  $^1\text{H}$  NMR (600 MHz,  $\text{CDCl}_3$ ):  $\delta = 7.81$ -7.79 (m, 2H), 7.74-7.72 (m, 5H), 7.70-7.68 (m, 3H), 7.63 (s, 2H), 7.52-7.49 (m, 2H), 7.46-7.40 (m, 6H), 7.39-7.36 (m, 4H), 7.04-7.03 (m, 1H), 6.69-6.68 (m, 2H), 6.64-6.62 (m, 1H), 3.78 (s, 3H);  $^{13}\text{C}\{^1\text{H}\}$  NMR (150 MHz,  $\text{CDCl}_3$ ):  $\delta = 165.3$  (d,  $J_{C-P} = 18.0$

Hz), 158.0, 155.7 (d,  $J_{C-P} = 12.0$  Hz), 138.1, 133.3, 132.8 (d,  $J_{C-P} = 108.0$  Hz), 132.3, 132.2 (d,  $J_{C-P} = 3.0$  Hz), 131.7 (d,  $J_{C-P} = 10.5$  Hz), 128.6 (d,  $J_{C-P} = 13.5$  Hz), 127.9, 127.8, 127.5 (d,  $J_{C-P} = 1.5$  Hz), 125.8 (d,  $J_{C-P} = 25.5$  Hz), 121.4, 121.2 (d,  $J_{C-P} = 10.5$  Hz), 112.6, 107.4 (d,  $J_{C-P} = 117.0$  Hz), 96.0, 55.6, 49.2;  $^{31}\text{P}\{^1\text{H}\}$  NMR (243 MHz,  $\text{CDCl}_3$ ):  $\delta = 21.5$ ; HRMS (ESI): Exact mass calcd for  $\text{C}_{42}\text{H}_{31}\text{O}_3\text{P}$   $[\text{M}+\text{H}]^+$ : 615.2084, Found: 615.2084.

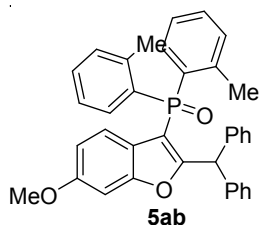

Column chromatography afforded the desired product **5ab** in 90% yield (146.5 mg) as white solid; Mp: 80-82 °C;  $^1\text{H}$  NMR (600 MHz,  $\text{CDCl}_3$ ):  $\delta = 7.42$ -7.40 (m, 2H), 7.26-7.10 (m, 16H), 7.04 (s, 1H), 6.59-6.58 (m, 1H), 6.53 (s, 1H), 6.46-6.44 (m, 1H), 3.78 (s, 3H), 2.52 (brs, 6H);  $^{13}\text{C}\{^1\text{H}\}$  NMR (150 MHz,  $\text{CDCl}_3$ ):  $\delta = 165.4$  (d,  $J_{C-P} = 18.0$  Hz), 157.9, 155.6 (d,  $J_{C-P} = 12.0$  Hz), 143.7 (d,  $J_{C-P} = 7.5$  Hz), 140.7,

132.0 (d,  $J_{C-P} = 10.5$  Hz), 129.2, 128.2, 126.6, 125.5 (d,  $J_{C-P} = 12.0$  Hz), 121.4 (d,  $J_{C-P} = 10.5$  Hz), 121.1, 112.4, 106.8 (d,  $J_{C-P} = 117.0$  Hz), 96.0, 55.6, 48.8, 21.6;  $^{31}\text{P}\{^1\text{H}\}$  NMR (243 MHz,  $\text{CDCl}_3$ ):  $\delta = 28.3$ ; HRMS (ESI): Exact mass calcd for  $\text{C}_{36}\text{H}_{31}\text{O}_3\text{P}$   $[\text{M}+\text{H}]^+$ : 543.2084, Found: 543.2088.

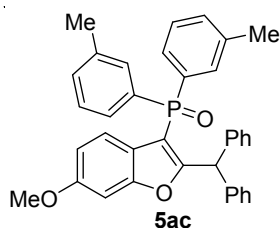

Product **5ac** was obtained in 78% yield (127.1 mg) as white solid; Mp: 77-79 °C;  $^1\text{H}$  NMR (600 MHz,  $\text{CDCl}_3$ ):  $\delta = 7.57$ -7.55 (m, 2H), 7.44-7.41 (m, 2H), 7.34-7.32 (m, 2H), 7.31-7.28 (m, 2H), 7.25-7.23 (m, 4H), 7.21-7.19 (m, 2H), 7.17-7.16 (m, 4H), 7.02-7.01 (m, 1H), 6.80-6.79 (m, 1H), 6.69-6.68 (m, 1H), 6.01 (s, 1H), 3.78 (s, 3H), 2.27 (s, 6H);  $^{13}\text{C}\{^1\text{H}\}$  NMR (150 MHz,  $\text{CDCl}_3$ ):  $\delta = 164.5$  (d,

$J_{C-P} = 18.0$  Hz), 157.9, 155.6 (d,  $J_{C-P} = 12.0$  Hz), 140.7, 138.6 (d,  $J_{C-P} = 12.0$  Hz), 132.9, 132.7 (d,  $J_{C-P} =$



108.0 Hz), 132.2 (d,  $J_{C-P} = 9.0$  Hz), 129.0, 128.7 (d,  $J_{C-P} = 10.5$  Hz), 128.4 (d,  $J_{C-P} = 13.5$  Hz), 128.2, 126.6, 121.8, 121.4 (d,  $J_{C-P} = 10.5$  Hz), 112.4, 107.6 (d,  $J_{C-P} = 117.0$  Hz), 96.0, 55.6, 48.9, 21.3;  $^{31}\text{P}\{^1\text{H}\}$  NMR (243 MHz,  $\text{CDCl}_3$ ):  $\delta = 22.3$ ; HRMS (ESI): Exact mass calcd for  $\text{C}_{36}\text{H}_{31}\text{O}_3\text{P}$   $[\text{M}+\text{H}]^+$ : 543.2084, Found: 543.2089.

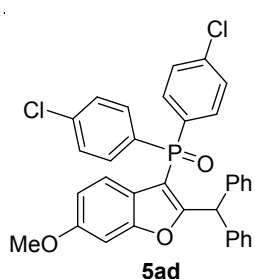

Column chromatography afforded the desired product **5ad** in 50% yield (87.5 mg) as white solid; Mp: 81-83 °C;  $^1\text{H}$  NMR (600 MHz,  $\text{CDCl}_3$ ):  $\delta = 7.60$ -7.56 (m, 4H), 7.39-7.37 (m, 4H), 7.26-7.18 (m, 10H), 7.02 (t,  $J = 1.8$  Hz, 1H), 6.69 (dd,  $J = 9.0$  Hz, 2.4 Hz, 1H), 6.58 (d,  $J = 9.0$  Hz, 1H), 6.34 (s, 1H), 3.78 (s, 3H);  $^{13}\text{C}\{^1\text{H}\}$  NMR (150 MHz,  $\text{CDCl}_3$ ):  $\delta = 166.1$  (d,  $J_{C-P} = 19.5$  Hz), 158.1, 155.7 (d,  $J_{C-P} = 13.5$  Hz), 140.4, 139.0, 133.0 (d,  $J_{C-P} = 12.0$  Hz), 131.1 (d,  $J_{C-P} = 109.5$  Hz), 129.1 (d,  $J_{C-P} = 13.5$  Hz), 129.0, 128.4, 126.8, 121.0, 120.7 (d,  $J_{C-P} = 10.5$  Hz), 112.8, 106.2 (d,  $J_{C-P} = 120.0$  Hz), 96.2, 55.7, 49.0;  $^{31}\text{P}\{^1\text{H}\}$  NMR (243 MHz,  $\text{CDCl}_3$ ):  $\delta = 20.5$ ; HRMS (ESI): Exact mass calcd for  $\text{C}_{34}\text{H}_{25}\text{Cl}_2\text{O}_3\text{P}$   $[\text{M}+\text{H}]^+$ : 583.0991, Found: 583.0994.

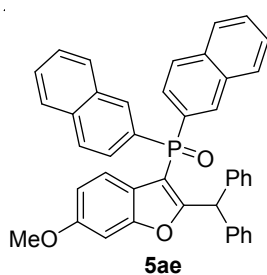

Column chromatography afforded the desired product **5ae** in 83% yield (153.1 mg) as white solid; Mp: 184-186 °C;  $^1\text{H}$  NMR (600 MHz,  $\text{CDCl}_3$ ):  $\delta = 8.29$ -8.27 (m, 2H), 7.88-7.87 (m, 4H), 7.77-7.73 (m, 4H), 7.61-7.59 (m, 2H), 7.54-7.51 (m, 2H), 7.19-7.14 (m, 10H), 7.04 (s, 1H), 6.76 (d,  $J = 8.4$  Hz, 1H), 6.61 (dd,  $J = 8.4$  Hz, 2.4 Hz, 1H), 6.25 (s, 1H), 3.76 (s, 3H);  $^{13}\text{C}\{^1\text{H}\}$  NMR (150 MHz,  $\text{CDCl}_3$ ):  $\delta = 165.3$  (d,  $J_{C-P} = 19.5$  Hz), 158.0, 155.7 (d,  $J_{C-P} = 12.0$  Hz), 140.6, 134.8, 133.7 (d,  $J_{C-P} = 10.5$  Hz), 132.5 (d,  $J_{C-P} = 13.5$  Hz), 130.1 (d,  $J_{C-P} = 108.0$  Hz), 129.0 (d,  $J_{C-P} = 7.5$  Hz), 128.6 (d,  $J_{C-P} = 12.0$  Hz), 128.3 (d,  $J_{C-P} = 6.0$  Hz), 127.8, 126.8 (d,  $J_{C-P} = 30.0$  Hz), 126.6 (d,  $J_{C-P} = 10.5$  Hz), 121.6, 121.3 (d,  $J_{C-P} = 10.5$  Hz), 112.5, 107.2 (d,  $J_{C-P} = 117.0$  Hz), 96.1, 55.6, 49.1;  $^{31}\text{P}\{^1\text{H}\}$  NMR (243 MHz,  $\text{CDCl}_3$ ):  $\delta = 22.2$ ; HRMS (ESI): Exact mass calcd for  $\text{C}_{42}\text{H}_{31}\text{O}_3\text{P}$   $[\text{M}+\text{H}]^+$ : 615.2084, Found: 615.2084.

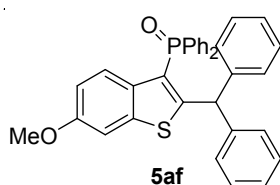

Column chromatography afforded the desired product **5af** in 68% yield (108.3 mg) as white solid; Mp: 65-67 °C;  $^1\text{H}$  NMR (600 MHz,  $\text{CDCl}_3$ ):  $\delta = 7.57$ -7.54 (m, 4H), 7.49-7.47 (m, 2H), 7.36-7.33 (m, 4H), 7.22-7.18 (m, 8H), 7.11-7.10 (m,

4H), 6.74 (s, 1H), 6.73-6.71 (m, 1H), 3.77 (s, 3H);  $^{13}\text{C}\{^1\text{H}\}$  NMR (150 MHz,  $\text{CDCl}_3$ ):  $\delta$  = 160.3 (d,  $J_{\text{C-P}}$  = 12.0 Hz), 157.1, 143.4, 140.9 (d,  $J_{\text{C-P}}$  = 13.5 Hz), 134.4 (d,  $J_{\text{C-P}}$  = 15.0 Hz), 133.2 (d,  $J_{\text{C-P}}$  = 105.0 Hz), 132.0, 131.8 (d,  $J_{\text{C-P}}$  = 9.0 Hz), 129.4, 128.6 (d,  $J_{\text{C-P}}$  = 12.0 Hz), 128.2, 126.8, 125.5, 121.8 (d,  $J_{\text{C-P}}$  = 102.0 Hz), 114.3, 104.5, 55.6, 49.8;  $^{31}\text{P}\{^1\text{H}\}$  NMR (243 MHz,  $\text{CDCl}_3$ ):  $\delta$  = 24.6; HRMS (ESI): Exact mass calcd for  $\text{C}_{34}\text{H}_{27}\text{O}_2\text{PS}$   $[\text{M}+\text{H}]^+$ : 531.1542, Found: 531.1546.

## 5. Gram-scale synthesis and product elaboration

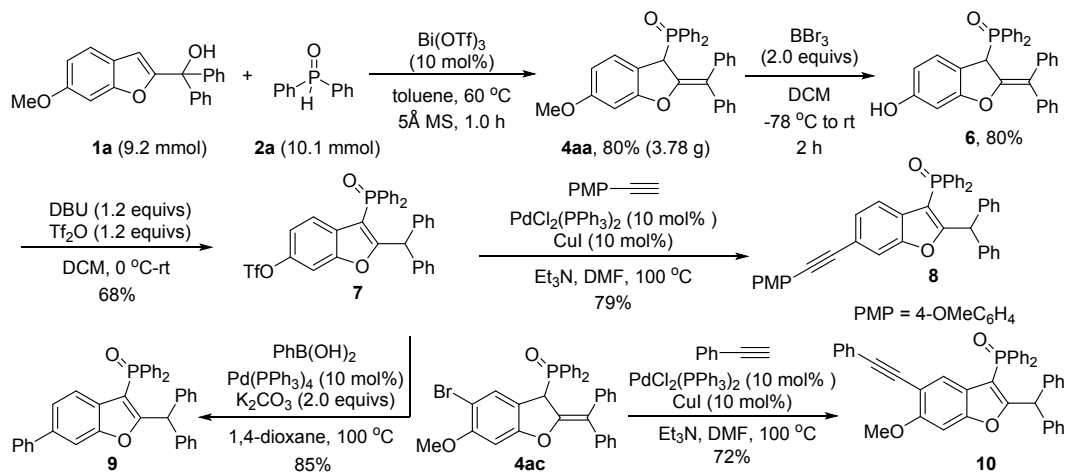

### 1) Gram-scale synthesis

The gram-scale reaction was carried out under an air atmosphere. To a 100 mL three-necked flask was added **1a** (3.03 g, 9.2 mmol, 1.0 equiv), Ph<sub>2</sub>P(O)H **2a** (2.04 g, 10.1 mmol, 1.1 equivs), Bi(OTf)<sub>3</sub> (603 mg, 10 mol%) and 9 g 5 Å MS. After adding 50.0 mL of anhydrous toluene, the reaction mixture was stirred at 60 °C till almost full conversion of **1a** by TLC analysis. The reaction mixture was directly subjected to column chromatography using petroleum ether/ethyl acetate (4:1 to 1:1, v:v) as the eluent to afford product **4aa** in 80% yield (3.78 g).

### 2) Product elaboration

#### 2a) The cleavage of the methyl group for the synthesis of **6**

Compound **6** was prepared according to the literature procedure.<sup>3</sup> To a dried Schlenk tube was added sequentially **4aa** (514.0 mg, 1 mmol, 1.0 equiv) and anhydrous CH<sub>2</sub>Cl<sub>2</sub> (6 mL) under nitrogen. The reaction mixture was cooled to -78 °C and then BBr<sub>3</sub> (0.2 mL, 2.0 mmol, 2.0 equivs) was added, followed by stirring at room temperature until full conversion of **4aa** by TLC analysis. Then, the reaction solution was slowly poured to a flask containing crush ice, extracted with dichloromethane (3\*20 mL) and washed with saturated NaHCO<sub>3</sub> solution. After dried with anhydrous Na<sub>2</sub>SO<sub>4</sub>, the organic layer was concentrated in vacuo to give the crude product, which was further subjected to column chromatography using CH<sub>2</sub>Cl<sub>2</sub>/MeOH (30:1, v:v) as the eluent to afford product **6** in 80% yield (400.0 mg) as pale pink solid. Mp: 224-226 °C; <sup>1</sup>H NMR (600 MHz, DMSO-*d*<sub>6</sub>): δ = 9.69 (s, 1H), 7.69-7.66 (m, 2H), 7.64-7.62

<sup>3</sup> W. Chen, W. Du, Y.-Z. Duan, Y. Wu, S.-Y. Yang, Y.-C. Chen, *Angew. Chem. Int. Ed.*, 2007, **46**, 7667.

(m, 1H), 7.59-7.56 (m, 2H), 7.53-7.50 (m, 2H), 7.48-7.46 (m, 1H), 7.38-7.35 (m, 2H), 7.33-7.27 (m, 3H), 7.19-7.16 (m, 3H), 7.13-7.10 (m, 2H), 6.91-6.90 (m, 2H), 6.36-6.34 (m, 1H), 6.32-6.31 (m, 1H), 6.23-6.21 (m, 1H), 5.99 (d,  $J = 10.8$  Hz, 1H);  $^{13}\text{C}\{^1\text{H}\}$  NMR (150 MHz, DMSO- $d_6$ ):  $\delta = 159.3, 158.5, 149.8$  (d,  $J_{\text{C-P}} = 10.5$  Hz), 139.4 (d,  $J_{\text{C-P}} = 61.5$  Hz), 131.8, 131.44, 131.35, 131.2 (d,  $J_{\text{C-P}} = 7.5$  Hz), 130.8, 130.6 (d,  $J_{\text{C-P}} = 9.0$  Hz), 129.6 (d,  $J_{\text{C-P}} = 28.5$  Hz), 128.5, 128.4, 128.3, 128.2, 127.8, 126.5 (d,  $J_{\text{C-P}} = 57.0$  Hz), 125.6, 119.8 (d,  $J_{\text{C-P}} = 12.0$  Hz), 112.0 (d,  $J_{\text{C-P}} = 7.5$  Hz), 104.5, 97.0, 45.6 (d,  $J_{\text{C-P}} = 58.5$  Hz);  $^{31}\text{P}\{^1\text{H}\}$  NMR (243 MHz, DMSO- $d_6$ ):  $\delta = 28.3$ ; HRMS (ESI): Exact mass calcd for  $\text{C}_{33}\text{H}_{25}\text{O}_3\text{P}$   $[\text{M}+\text{H}]^+$ : 501.1614, Found: 501.1611.

## 2b) Procedure for the synthesis of 7

To a 50 mL three-necked flask were added **6** (250.0 mg, 0.5 mmol, 1.0 equiv) and anhydrous  $\text{CH}_2\text{Cl}_2$  (15 mL) under nitrogen. The reaction mixture was then cooled to 0 °C and DBU (90  $\mu\text{L}$ , 0.6 mmol, 1.2 equivs),  $\text{Tf}_2\text{O}$  (101  $\mu\text{L}$ , 0.6 mmol, 1.2 equivs) were added sequentially, followed by stirring at room temperature for 1.0 h until full conversion of **6** by TLC analysis. The reaction mixture was directly subjected to column chromatography using petroleum ether/ethyl acetate (3:1, v:v) as the eluent to afford product **7** in 68% yield (215.0 mg). Mp: 113-115 °C;  $^1\text{H}$  NMR (600 MHz,  $\text{CDCl}_3$ ):  $\delta = 7.69$ -7.66 (m, 4H), 7.58-7.56 (m, 2H), 7.46-7.42 (m, 5H), 7.26-7.25 (m, 2H), 7.24-7.21 (m, 4H), 7.16-7.14 (m, 4H), 6.99-6.97 (m, 1H), 6.88-6.86 (m, 1H), 6.17 (s, 1H);  $^{13}\text{C}\{^1\text{H}\}$  NMR (150 MHz,  $\text{CDCl}_3$ ):  $\delta = 168.6$  (d,  $J_{\text{C-P}} = 16.5$  Hz), 154.0 (d,  $J_{\text{C-P}} = 12.0$  Hz), 146.5, 139.9, 132.7, 131.9, 131.8 (d,  $J_{\text{C-P}} = 9.0$  Hz), 129.1, 129.0, 128.9, 128.6, 127.1, 122.4, 118.8 (q,  $J_{\text{C-F}} = 318.0$  Hz), 117.3, 108.4, 107.6, 105.8, 49.2;  $^{31}\text{P}\{^1\text{H}\}$  NMR (243 MHz,  $\text{CDCl}_3$ ):  $\delta = 21.4$ ;  $^{19}\text{F}\{^1\text{H}\}$  NMR (565 MHz,  $\text{CDCl}_3$ ):  $\delta = -72.6$ ; HRMS (ESI): Exact mass calcd for  $\text{C}_{34}\text{H}_{24}\text{F}_3\text{O}_5\text{PS}$   $[\text{M}+\text{Na}]^+$ : 655.0926, Found: 655.0925.

## 2c) Sonogashira coupling reaction for the synthesis of 8

Compound **8** was prepared from **7** (63.0 mg, 0.1 mmol) and 1-ethynyl-4-methoxybenzene (39.6 mg, 0.3 mmol) according to the literature procedure.<sup>4</sup> Column chromatography afforded the desired product **8** in 79% yield (48.6 mg) as yellow solid. Mp: 48-50 °C;  $^1\text{H}$  NMR (600 MHz,  $\text{CDCl}_3$ ):  $\delta = 7.71$ -7.67 (m, 4H), 7.63 (s, 1 H), 7.56-7.53 (m, 2H), 7.44-7.40 (m, 6H), 7.26-7.23 (m, 4H), 7.21-7.17 (m, 7H), 6.86 (d,  $J = 9.0$  Hz, 2H), 6.73 (d,  $J = 8.4$  Hz, 1H), 6.33 (s, 1H), 3.80 (s, 3H);  $^{13}\text{C}\{^1\text{H}\}$  NMR (150

<sup>4</sup>Q.-Y. Chen, Z.-Y. Yang, *Tetrahedron Lett.*, 1986, **27**, 1171.

MHz, CDCl<sub>3</sub>):  $\delta$  = 167.4 (d,  $J_{C-P}$  = 18.0 Hz), 159.6, 154.2 (d,  $J_{C-P}$  = 10.5 Hz), 140.3, 134.0, 133.0, 132.2, 131.7 (d,  $J_{C-P}$  = 10.5 Hz), 129.0, 128.7 (d,  $J_{C-P}$  = 12.0 Hz), 128.3, 128.1 (d,  $J_{C-P}$  = 9.0 Hz), 127.1, 126.8, 121.1, 119.9, 115.1, 114.3, 114.1, 114.0, 107.6 (d,  $J_{C-P}$  = 117.0 Hz), 89.6, 87.8, 55.2, 48.9; <sup>31</sup>P{<sup>1</sup>H} NMR (243 MHz, CDCl<sub>3</sub>):  $\delta$  = 21.9; HRMS (ESI): Exact mass calcd for C<sub>42</sub>H<sub>31</sub>O<sub>3</sub>P [M+Na]<sup>+</sup>: 637.1903, Found: 637.1901.

## 2d) Suzuki coupling reaction for the synthesis of 9

Compound **9** was prepared from **7** (63.0 mg, 0.1 mmol) and phenylboronic acid (24.4 mg, 0.2 mmol) according to the literature procedure.<sup>5</sup> Column chromatography afforded the desired product **9** in 85% yield (47.5 mg) as white solid. Mp: 62-64 °C; <sup>1</sup>H NMR (600 MHz, CDCl<sub>3</sub>):  $\delta$  = 7.73-7.70 (m, 5H), 7.55-7.52 (m, 4H), 7.44-7.38 (m, 6H), 7.32-7.30 (m, 1H), 7.28-7.26 (m, 1H), 7.24-7.23 (m, 8H), 7.21-7.18 (m, 2H), 6.80 (d,  $J$  = 8.4 Hz, 1H), 6.40 (s, 1H); <sup>13</sup>C{<sup>1</sup>H} NMR (150 MHz, CDCl<sub>3</sub>):  $\delta$  = 167.0 (d,  $J_{C-P}$  = 18.0 Hz), 155.2 (d,  $J_{C-P}$  = 12.0 Hz), 140.5 (d,  $J_{C-P}$  = 15.0 Hz), 138.3, 132.8 (d,  $J_{C-P}$  = 108.0 Hz), 132.2, 131.7 (d,  $J_{C-P}$  = 9.0 Hz), 129.1, 128.8, 128.7, 128.6, 128.3, 127.32, 127.27, 127.2, 126.7, 123.0, 121.4, 110.0, 107.3 (d,  $J_{C-P}$  = 117.0 Hz), 49.0; <sup>31</sup>P{<sup>1</sup>H} NMR (243 MHz, CDCl<sub>3</sub>):  $\delta$  = 22.1; HRMS (ESI): Exact mass calcd for C<sub>39</sub>H<sub>29</sub>O<sub>2</sub>P [M+Na]<sup>+</sup>: 583.1797, Found: 583.1799.

## 2e) Sonogashira coupling reaction for the synthesis of 10

Compound **10** was prepared from **4ac** (59.3 mg, 0.1 mmol) and phenylacetylene (30.6 mg, 0.3 mmol) according to the literature procedure.<sup>4</sup> Column chromatography afforded the desired product **13** in 72% yield (44.2 mg) as yellow solid. Mp: 173-175 °C; <sup>1</sup>H NMR (600 MHz, CDCl<sub>3</sub>):  $\delta$  = 7.71-7.67 (m, 4H), 7.57-7.55 (m, 2H), 7.48-7.46 (m, 2H), 7.45-7.42 (m, 4H), 7.32-7.29 (m, 3H), 7.26-7.23 (m, 4H), 7.22-7.20 (m, 2H), 7.17-7.16 (m, 4H), 7.023-7.022 (m, 1H), 6.95 (s, 1H), 6.13 (s, 1H), 3.89 (s, 3H); <sup>13</sup>C{<sup>1</sup>H} NMR (150 MHz, CDCl<sub>3</sub>):  $\delta$  = 165.6 (d,  $J_{C-P}$  = 16.5 Hz), 158.4, 155.4 (d,  $J_{C-P}$  = 12.0 Hz), 140.5, 132.4 (d,  $J_{C-P}$  = 109.5 Hz), 132.3, 131.8, 131.7, 131.5, 129.0, 128.8 (d,  $J_{C-P}$  = 13.5 Hz), 128.3, 128.2, 128.0, 126.8, 125.8, 123.4, 121.1 (d,  $J_{C-P}$  = 10.5 Hz), 109.5, 107.2 (d,  $J_{C-P}$  = 115.5 Hz), 94.7, 92.6, 85.6, 56.2, 48.9; <sup>31</sup>P{<sup>1</sup>H} NMR (243 MHz, CDCl<sub>3</sub>):  $\delta$  = 22.1; HRMS (ESI): Exact mass calcd for C<sub>42</sub>H<sub>31</sub>O<sub>3</sub>P [M+H]<sup>+</sup>: 615.2084, Found: 615.2083.

<sup>5</sup> N. Eleya, A. Mahal, M. Hein, A. Villiger, P. Langer, *Adv. Synth. Catal.*, 2011, **353**, 2761.

## 6. Asymmetric feasibility of this dearomative C3-phosphorylation of 2-benzofuran-ol

The asymmetric version of the dearomative C3-phosphorylation of 2-benzofuran-ol **1a** with  $\text{Ph}_2\text{P(O)H}$  (**2a**) was investigated by brief screening typical N- and P- ligands **L**<sub>1</sub>-**L**<sub>5</sub> and chiral phosphoric acid (CPA), and the results were shown in Table S2.

**Table S2.** Brief screening chiral ligand

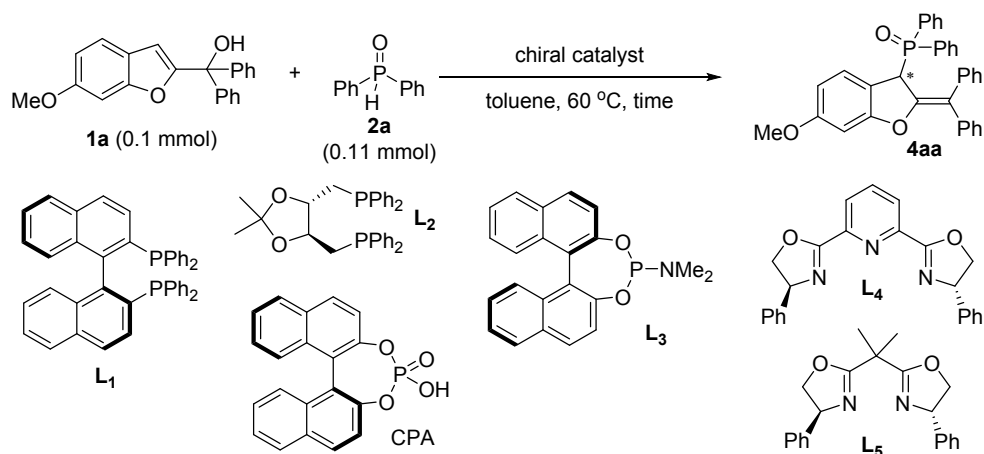

| entry <sup>a</sup> | Chiral catalyst                                                      | time/h | yield <sup>b</sup> /% | ee <sup>c</sup> /% |
|--------------------|----------------------------------------------------------------------|--------|-----------------------|--------------------|
| 1                  | $\text{Bi}(\text{OTf})_3$ (10 mol%)+ <b>L</b> <sub>1</sub> (11 mol%) | 0.5    | 82                    | 1.0                |
| 2                  | $\text{Bi}(\text{OTf})_3$ (10 mol%)+ <b>L</b> <sub>2</sub> (11 mol%) | 4.0    | 68                    | 2.5                |
| 3                  | $\text{Bi}(\text{OTf})_3$ (10 mol%)+ <b>L</b> <sub>3</sub> (11 mol%) | 0.5    | 83                    | 1.0                |
| 4                  | $\text{Bi}(\text{OTf})_3$ (10 mol%)+ <b>L</b> <sub>4</sub> (11 mol%) | 2.0    | 86                    | 1.5                |
| 5                  | $\text{Bi}(\text{OTf})_3$ (10 mol%)+ <b>L</b> <sub>5</sub> (11 mol%) | 5.0    | 82                    | 2.0                |
| 6                  | $\text{Bi}(\text{OTf})_3$ (10 mol%)+CPA (11 mol%)                    | 0.5    | 80                    | 0.0                |
| 7                  | CPA (10 mol%)                                                        | 12.0   | 68                    | 0.0                |

<sup>a</sup> 0.1 mmol scale; <sup>b</sup> isolated yield; <sup>c</sup> determined by chiral HPLC.

## 7. X-ray Crystallographic Data of 4aa

Data intensity of **4aa** was collected on a 'Bruker APEX-II CCD' diffractometer at 299 K. Data collection and reduction were done by using Olex2 and the structure was solved with the ShelXT structure solution program using Intrinsic Phasing and refined with the ShelXL refinement package using Least Squares minimization. Hydrogen atoms were added at their geometrically ideal positions and refined isotropically. Crystal data for **4aa**: C<sub>34</sub>H<sub>27</sub>O<sub>3</sub>P, *T* = 299 K, triclinic, space group P-1 (no. 2), *a* = 5.7794(2) Å, *b* = 10.4840(4) Å, *c* = 22.3150(10) Å,  $\alpha$  = 91.944(2) deg,  $\beta$  = 90.968(2) deg,  $\gamma$  = 101.813(2) deg, *V* = 1322.30(9) Å<sup>3</sup>. *Z* = 2, *d*<sub>calc</sub> = 1.292 g/m<sup>3</sup>. 44658 reflections measured (4.308° ≤ 2 $\theta$  ≤ 58.34°), 7068 unique [*R*<sub>int</sub> = 0.1511, *R*<sub>sigma</sub> = 0.1194] which were used in all calculations. The final *R*<sub>1</sub> was 0.0746 (*I* > 2 $\sigma$ (*I*)) and *wR*<sub>2</sub> was 0.2060 (all data).

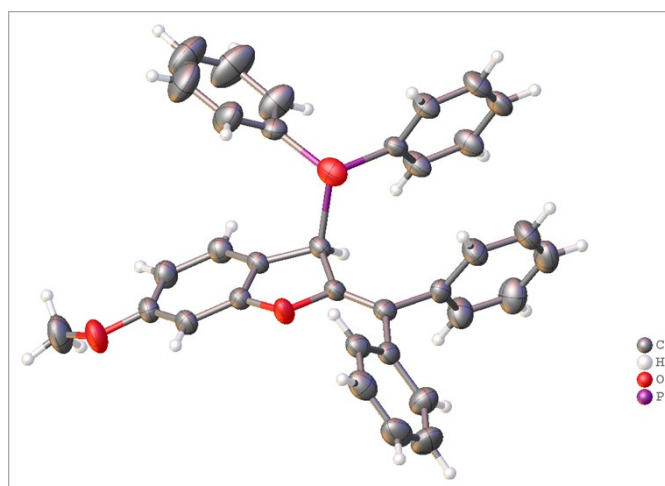

**Table S3. Crystal data and structure refinement for mo\_CL-ZH-65\_0m.**

|                       |                                                  |
|-----------------------|--------------------------------------------------|
| Identification code   | mo_CL_ZH_65_0m                                   |
| Empirical formula     | C <sub>34</sub> H <sub>27</sub> O <sub>3</sub> P |
| Formula weight        | 514.52                                           |
| Temperature/K         | 299.0                                            |
| Crystal system        | triclinic                                        |
| Space group           | P-1                                              |
| <i>a</i> /Å           | 5.7794(2)                                        |
| <i>b</i> /Å           | 10.4840(4)                                       |
| <i>c</i> /Å           | 22.3150(10)                                      |
| $\alpha$ /°           | 91.944(2)                                        |
| $\beta$ /°            | 90.968(2)                                        |
| $\gamma$ /°           | 101.813(2)                                       |
| Volume/Å <sup>3</sup> | 1322.30(9)                                       |

|                                                |                                                               |
|------------------------------------------------|---------------------------------------------------------------|
| Z                                              | 2                                                             |
| $\rho_{\text{calc}}/\text{cm}^3$               | 1.292                                                         |
| $\mu/\text{mm}^{-1}$                           | 0.138                                                         |
| F(000)                                         | 540.0                                                         |
| Crystal size/ $\text{mm}^3$                    | $0.4 \times 0.2 \times 0.1$                                   |
| Radiation                                      | MoK $\alpha$ ( $\lambda = 0.71073$ )                          |
| 2 $\Theta$ range for data collection/ $^\circ$ | 4.308 to 58.34                                                |
| Index ranges                                   | $-7 \leq h \leq 7, -14 \leq k \leq 14, -30 \leq l \leq 30$    |
| Reflections collected                          | 44658                                                         |
| Independent reflections                        | 7068 [ $R_{\text{int}} = 0.1511, R_{\text{sigma}} = 0.1194$ ] |
| Data/restraints/parameters                     | 7068/0/344                                                    |
| Goodness-of-fit on $F^2$                       | 1.029                                                         |
| Final R indexes [ $I \geq 2\sigma(I)$ ]        | $R_1 = 0.0746, wR_2 = 0.1770$                                 |
| Final R indexes [all data]                     | $R_1 = 0.1233, wR_2 = 0.2060$                                 |
| Largest diff. peak/hole / $e \text{ \AA}^{-3}$ | 0.63/-0.72                                                    |

**Table S4. Fractional Atomic Coordinates ( $\times 10^4$ ) and Equivalent Isotropic Displacement Parameters ( $\text{\AA}^2 \times 10^3$ ) for mo\_CL-ZH-65\_0m.  $U_{\text{eq}}$  is defined as 1/3 of of the trace of the orthogonalised  $U_{ij}$  tensor.**

| Atom | x         | y          | z          | U(eq)     |
|------|-----------|------------|------------|-----------|
| P001 | 2667.1(9) | 2880.5(5)  | 2963.9(3)  | 31.65(18) |
| O002 | 3000(3)   | 6088.3(13) | 2478.5(7)  | 38.2(4)   |
| O003 | 186(3)    | 3068.5(15) | 2966.9(8)  | 44.0(4)   |
| O003 | 186(3)    | 3068.5(15) | 2966.9(8)  | 44.0(4)   |
| O004 | 8077(3)   | 8921.7(16) | 3865.6(8)  | 54.1(5)   |
| C005 | 2171(4)   | 4607(2)    | 1647.4(10) | 34.5(5)   |
| C006 | 5863(3)   | 5323.4(18) | 2996.2(10) | 30.7(4)   |
| C007 | 3170(4)   | 4906.4(18) | 2186.0(10) | 33.0(5)   |
| C008 | 4757(4)   | 6357.8(19) | 2917.2(10) | 31.9(5)   |
| C009 | 4650(3)   | 4213.0(18) | 2580.2(10) | 31.4(5)   |
| C00A | 802(4)    | 5469(2)    | 1347.8(10) | 36.6(5)   |
| C00B | -915(4)   | 5972(2)    | 1650.6(11) | 39.4(5)   |
| C00C | 2414(4)   | 3384(2)    | 1305.4(10) | 34.8(5)   |
| C00D | 2946(3)   | 1370.1(18) | 2590.3(10) | 31.8(5)   |
| C00E | 7789(4)   | 5488(2)    | 3380.7(11) | 37.8(5)   |
| C00F | 3805(4)   | 2824(2)    | 3714.7(11) | 39.7(5)   |
| C00G | 5437(4)   | 7548(2)    | 3212.4(10) | 37.9(5)   |
| C00H | 7413(4)   | 7705(2)    | 3596.3(10) | 38.1(5)   |
| C00I | 4948(4)   | 1176(2)    | 2301.6(12) | 41.9(6)   |
| C00J | 8579(4)   | 6684(2)    | 3680.1(11) | 41.3(5)   |



|      |          |          |            |          |
|------|----------|----------|------------|----------|
| C00K | 2976(4)  | -1000(2) | 2004.7(12) | 45.3(6)  |
| C00L | 986(4)   | 349(2)   | 2601.3(11) | 40.8(5)  |
| C00M | 4947(4)  | -2(2)    | 2002.7(12) | 45.5(6)  |
| C00N | 1023(4)  | -830(2)  | 2313.1(12) | 48.2(6)  |
| C00O | -2233(4) | 6747(2)  | 1366.9(13) | 49.9(6)  |
| C00P | 4419(4)  | 3292(3)  | 998.8(12)  | 50.3(6)  |
| C00Q | 527(4)   | 2324(2)  | 1273.4(12) | 47.6(6)  |
| C00R | 1145(5)  | 5778(3)  | 752.5(12)  | 53.7(7)  |
| C00S | -1839(5) | 7054(3)  | 783.4(14)  | 59.3(8)  |
| C00T | 688(5)   | 1197(2)  | 944.8(13)  | 58.5(7)  |
| C00U | 2668(5)  | 1122(3)  | 645.2(13)  | 57.7(7)  |
| C00V | 4558(5)  | 2164(3)  | 670.6(14)  | 59.4(7)  |
| C00W | 5538(5)  | 2139(3)  | 3858.0(14) | 65.4(8)  |
| C00X | 2813(6)  | 3421(3)  | 4171.8(13) | 65.4(8)  |
| C00Y | -149(6)  | 6581(3)  | 477.1(14)  | 66.1(8)  |
| C00Z | 10288(5) | 9232(3)  | 4175.7(15) | 69.1(9)  |
| C010 | 5234(7)  | 2673(4)  | 4893.1(16) | 87.8(11) |
| C011 | 3548(7)  | 3367(4)  | 4759.8(16) | 88.3(11) |
| C012 | 6221(6)  | 2079(5)  | 4449.5(16) | 95.1(13) |

**Table S5. Anisotropic Displacement Parameters ( $\text{\AA}^2 \times 10^3$ ) for mo\_CL-ZH-65\_0m. The Anisotropic displacement factor exponent takes the form:  $-2\pi^2[h^2a^*2U_{11}+2hka^*b^*U_{12}+\dots]$ .**

| Atom | $U_{11}$ | $U_{22}$ | $U_{33}$ | $U_{23}$ | $U_{13}$ | $U_{12}$ |
|------|----------|----------|----------|----------|----------|----------|
| P001 | 32.5(3)  | 24.7(3)  | 38.0(4)  | 2.9(2)   | 3.2(2)   | 5.89(19) |
| O002 | 50.4(9)  | 25.6(7)  | 38.4(9)  | -4.6(6)  | -13.9(7) | 9.4(6)   |
| O003 | 35.5(8)  | 39.5(9)  | 59.7(11) | 2.2(8)   | 7.1(7)   | 13.6(6)  |
| O004 | 63.7(11) | 36.2(9)  | 58.7(12) | -17.0(8) | -15.9(9) | 6.5(7)   |
| C005 | 37.2(11) | 29.2(10) | 34.2(12) | 2.8(9)   | -1.3(9)  | -0.2(8)  |
| C006 | 34.7(10) | 23.5(9)  | 33.1(12) | 0.9(8)   | -0.1(9)  | 4.2(7)   |
| C007 | 40.6(11) | 22.3(9)  | 33.8(12) | 1.7(8)   | -2.5(9)  | 1.6(8)   |
| C008 | 37.4(11) | 26.9(10) | 30.5(12) | 1.1(8)   | -1.8(9)  | 4.6(8)   |
| C009 | 35.8(10) | 23.7(9)  | 33.8(12) | -0.4(8)  | 1.5(9)   | 4.1(7)   |
| C00A | 41.0(12) | 29.4(10) | 34.8(12) | 1.2(9)   | -6.8(9)  | -3.0(8)  |
| C00B | 39.3(12) | 32.8(11) | 42.5(14) | 2.9(10)  | -5.7(10) | -0.8(8)  |
| C00C | 40.9(11) | 31.8(10) | 29.9(12) | -0.9(9)  | -6.8(9)  | 3.9(8)   |
| C00D | 34.8(11) | 23.6(9)  | 35.9(12) | 5.8(8)   | -2.3(9)  | 3.1(7)   |
| C00E | 38.6(11) | 34.7(11) | 40.8(13) | 1.0(10)  | -3.4(10) | 9.8(8)   |
| C00F | 43.1(12) | 34.2(11) | 39.1(13) | 7.5(10)  | 4.6(10)  | 0.7(9)   |
| C00G | 48.2(12) | 27.7(10) | 37.8(13) | -2.2(9)  | -2.2(10) | 8.7(9)   |
| C00H | 45.5(12) | 30.0(11) | 35.8(13) | -4.8(9)  | -2.2(10) | 2.1(9)   |

|      |          |          |          |           |           |          |
|------|----------|----------|----------|-----------|-----------|----------|
| C00I | 35.6(11) | 29.1(11) | 59.9(16) | 0.8(10)   | 7.2(11)   | 3.5(8)   |
| C00J | 41.7(12) | 40.1(12) | 41.0(14) | -3.1(10)  | -8.7(10)  | 7.5(9)   |
| C00K | 60.1(15) | 23.0(10) | 53.0(16) | 1.2(10)   | -3.0(12)  | 9.7(9)   |
| C00L | 35.0(11) | 33.1(11) | 51.7(15) | 1.8(10)   | 3.0(10)   | 1.2(8)   |
| C00M | 44.6(13) | 33.7(12) | 60.9(17) | 1.6(11)   | 7.9(11)   | 13.7(9)  |
| C00N | 46.5(13) | 29.7(11) | 62.6(18) | 0.9(11)   | -0.5(12)  | -5.1(9)  |
| C00O | 42.2(13) | 41.1(13) | 64.7(19) | 0.1(12)   | -10.2(12) | 5.6(10)  |
| C00P | 44.0(13) | 51.7(15) | 50.8(16) | -8.4(12)  | -0.3(12)  | 1.4(10)  |
| C00Q | 50.1(14) | 36.7(12) | 51.0(16) | -3.6(11)  | 1.6(12)   | -2.3(10) |
| C00R | 68.6(17) | 53.9(16) | 40.4(15) | 6.4(12)   | -2.3(13)  | 16.2(12) |
| C00S | 70.3(18) | 44.1(14) | 64(2)    | 9.6(13)   | -20.8(15) | 12.8(12) |
| C00T | 74.0(18) | 33.4(13) | 60.9(19) | -5.6(12)  | -0.7(15)  | -4.1(12) |
| C00U | 82(2)    | 43.0(14) | 51.2(17) | -10.6(12) | -10.7(15) | 22.2(13) |
| C00V | 58.4(16) | 64.6(18) | 58.0(18) | -12.3(14) | -0.2(14)  | 21.9(13) |
| C00W | 54.8(16) | 101(2)   | 47.9(17) | 9.6(16)   | -1.3(13)  | 33.1(15) |
| C00X | 90(2)    | 66.2(19) | 45.0(17) | -0.7(14)  | 4.9(15)   | 28.0(16) |
| C00Y | 98(2)    | 61.5(18) | 41.4(16) | 14.3(14)  | -8.7(16)  | 21.1(16) |
| C00Z | 76(2)    | 53.2(17) | 72(2)    | -20.5(15) | -27.5(17) | 3.4(14)  |
| C010 | 78(2)    | 139(4)   | 43.4(19) | 12(2)     | -9.5(17)  | 15(2)    |
| C011 | 112(3)   | 112(3)   | 43.2(19) | -8.8(19)  | 6.8(19)   | 30(2)    |
| C012 | 73(2)    | 167(4)   | 56(2)    | 23(2)     | -9.0(18)  | 51(2)    |
| P001 | 32.5(3)  | 24.7(3)  | 38.0(4)  | 2.9(2)    | 3.2(2)    | 5.89(19) |
| O002 | 50.4(9)  | 25.6(7)  | 38.4(9)  | -4.6(6)   | -13.9(7)  | 9.4(6)   |
| O003 | 35.5(8)  | 39.5(9)  | 59.7(11) | 2.2(8)    | 7.1(7)    | 13.6(6)  |
| O004 | 63.7(11) | 36.2(9)  | 58.7(12) | -17.0(8)  | -15.9(9)  | 6.5(7)   |
| C005 | 37.2(11) | 29.2(10) | 34.2(12) | 2.8(9)    | -1.3(9)   | -0.2(8)  |
| C006 | 34.7(10) | 23.5(9)  | 33.1(12) | 0.9(8)    | -0.1(9)   | 4.2(7)   |
| C007 | 40.6(11) | 22.3(9)  | 33.8(12) | 1.7(8)    | -2.5(9)   | 1.6(8)   |
| C008 | 37.4(11) | 26.9(10) | 30.5(12) | 1.1(8)    | -1.8(9)   | 4.6(8)   |

**Table S6. Bond Lengths for mo\_CL\_ZH\_65\_0m.**

| Atom | Atom | Length/Å   | Atom | Atom | Length/Å |
|------|------|------------|------|------|----------|
| P001 | O003 | 1.4872(15) | C00D | C00L |          |
| P001 | C009 | 1.859(2)   | C00E | C00J |          |
| P001 | C00D | 1.802(2)   | C00F | C00W |          |
| P001 | C00F | 1.797(2)   | C00F | C00X |          |
| O002 | C007 | 1.403(2)   | C00G | C00H |          |
| O002 | C008 | 1.378(2)   | C00H | C00J |          |
| O004 | C00H | 1.369(3)   | C00I | C00M |          |
| O004 | C00Z | 1.415(3)   | C00K | C00M |          |

|      |      |          |      |      |
|------|------|----------|------|------|
| C005 | C007 | 1.324(3) | C00K | C00N |
| C005 | C00A | 1.485(3) | C00L | C00N |
| C005 | C00C | 1.502(3) | C00O | C00S |
| C006 | C008 | 1.381(3) | C00P | C00V |
| C006 | C009 | 1.510(3) | C00Q | C00T |
| C006 | C00E | 1.372(3) | C00R | C00Y |
| C007 | C009 | 1.519(3) | C00S | C00Y |
| C008 | C00G | 1.371(3) | C00T | C00U |
| C00A | C00B | 1.390(3) | C00U | C00V |
| C00A | C00R | 1.386(3) | C00W | C012 |
| C00B | C00O | 1.383(3) | C00X | C011 |
| C00C | C00P | 1.374(3) | C010 | C011 |
| C00C | C00Q | 1.387(3) | C010 | C012 |
| C00D | C00I | 1.382(3) |      |      |

**Table S7. Bond Angles for mo\_CL\_ZH\_65\_0m.**

| Atom | Atom | Atom | Angle/°    | Atom | Atom | Atom | Angle/° |
|------|------|------|------------|------|------|------|---------|
| O003 | P001 | C009 | 111.77(9)  | C00I | C00D | C00L |         |
| O003 | P001 | C00D | 112.70(9)  | C00L | C00D | P001 |         |
| O003 | P001 | C00F | 111.02(11) | C006 | C00E | C00J |         |
| C00D | P001 | C009 | 106.94(10) | C00W | C00F | P001 |         |
| C00F | P001 | C009 | 108.18(10) | C00X | C00F | P001 |         |
| C00F | P001 | C00D | 105.92(10) | C00X | C00F | C00W |         |
| C008 | O002 | C007 | 107.47(15) | C008 | C00G | C00H |         |
| C00H | O004 | C00Z | 117.96(19) | O004 | C00H | C00G |         |
| C007 | C005 | C00A | 121.91(19) | O004 | C00H | C00J |         |
| C007 | C005 | C00C | 121.23(19) | C00J | C00H | C00G |         |
| C00A | C005 | C00C | 116.85(18) | C00D | C00I | C00M |         |
| C008 | C006 | C009 | 107.65(17) | C00E | C00J | C00H |         |
| C00E | C006 | C008 | 118.95(19) | C00N | C00K | C00M |         |
| C00E | C006 | C009 | 133.29(18) | C00N | C00L | C00D |         |
| O002 | C007 | C009 | 108.35(16) | C00K | C00M | C00I |         |
| C005 | C007 | O002 | 119.52(18) | C00K | C00N | C00L |         |
| C005 | C007 | C009 | 132.09(19) | C00S | C00O | C00B |         |
| O002 | C008 | C006 | 112.36(17) | C00C | C00P | C00V |         |
| C00G | C008 | O002 | 123.71(18) | C00C | C00Q | C00T |         |
| C00G | C008 | C006 | 123.79(19) | C00A | C00R | C00Y |         |
| C006 | C009 | P001 | 114.03(15) | C00O | C00S | C00Y |         |
| C006 | C009 | C007 | 100.93(15) | C00U | C00T | C00Q |         |
| C007 | C009 | P001 | 109.23(13) | C00T | C00U | C00V |         |

|      |      |      |            |      |      |      |
|------|------|------|------------|------|------|------|
| C00B | C00A | C005 | 121.2(2)   | C00U | C00V | C00P |
| C00R | C00A | C005 | 121.4(2)   | C012 | C00W | C00F |
| C00R | C00A | C00B | 117.4(2)   | C00F | C00X | C011 |
| C00O | C00B | C00A | 121.2(2)   | C00S | C00Y | C00R |
| C00P | C00C | C005 | 122.20(19) | C012 | C010 | C011 |
| C00P | C00C | C00Q | 118.3(2)   | C010 | C011 | C00X |
| C00Q | C00C | C005 | 119.5(2)   | C010 | C012 | C00W |
| O003 | P001 | C009 | 111.77(9)  | C00I | C00D | C00L |
| O003 | P001 | C00D | 112.70(9)  | C00L | C00D | P001 |
| O003 | P001 | C00F | 111.02(11) | C006 | C00E | C00J |
| C00D | P001 | C009 | 106.94(10) | C00W | C00F | P001 |
| C00F | P001 | C009 | 108.18(10) | C00X | C00F | P001 |
| C00F | P001 | C00D | 105.92(10) | C00X | C00F | C00W |
| C008 | O002 | C007 | 107.47(15) | C008 | C00G | C00H |
| C00I | C00D | P001 | 124.37(15) |      |      |      |

**Table S8. Hydrogen Atom Coordinates ( $\text{\AA}\times 10^4$ ) and Isotropic Displacement Parameters ( $\text{\AA}^2\times 10^3$ ) for mo\_CL\_ZH\_65\_0m.**

| Atom | x     | y     | z    | U(eq) |
|------|-------|-------|------|-------|
| H009 | 5809  | 3868  | 2342 | 38    |
| H00B | -1182 | 5784  | 2051 | 47    |
| H00E | 8558  | 4804  | 3440 | 45    |
| H00G | 4623  | 8216  | 3159 | 45    |
| H00I | 6296  | 1836  | 2308 | 50    |
| H00J | 9893  | 6804  | 3938 | 50    |
| H00K | 2973  | -1785 | 1797 | 54    |
| H00L | -355  | 462   | 2804 | 49    |
| H00M | 6282  | -122  | 1799 | 55    |
| H00N | -283  | -1514 | 2328 | 58    |
| H00O | -3394 | 7060  | 1575 | 60    |
| H00P | 5698  | 3994  | 1012 | 60    |
| H00Q | -855  | 2368  | 1473 | 57    |
| H00R | 2258  | 5442  | 535  | 64    |
| H00S | -2717 | 7583  | 595  | 71    |
| H00T | -581  | 489   | 931  | 70    |
| H00U | 2755  | 368   | 422  | 69    |
| H00V | 5930  | 2111  | 468  | 71    |
| H00W | 6237  | 1723  | 3557 | 78    |
| H00X | 1625  | 3870  | 4083 | 78    |
| H00Y | 136   | 6799  | 81   | 79    |

---

|      |       |       |      |     |
|------|-------|-------|------|-----|
| H00A | 11494 | 9028  | 3921 | 104 |
| H00C | 10218 | 8734  | 4530 | 104 |
| H00D | 10650 | 10146 | 4286 | 104 |
| H010 | 5702  | 2610  | 5290 | 105 |
| H011 | 2899  | 3801  | 5064 | 106 |
| H012 | 7385  | 1619  | 4544 | 114 |

---

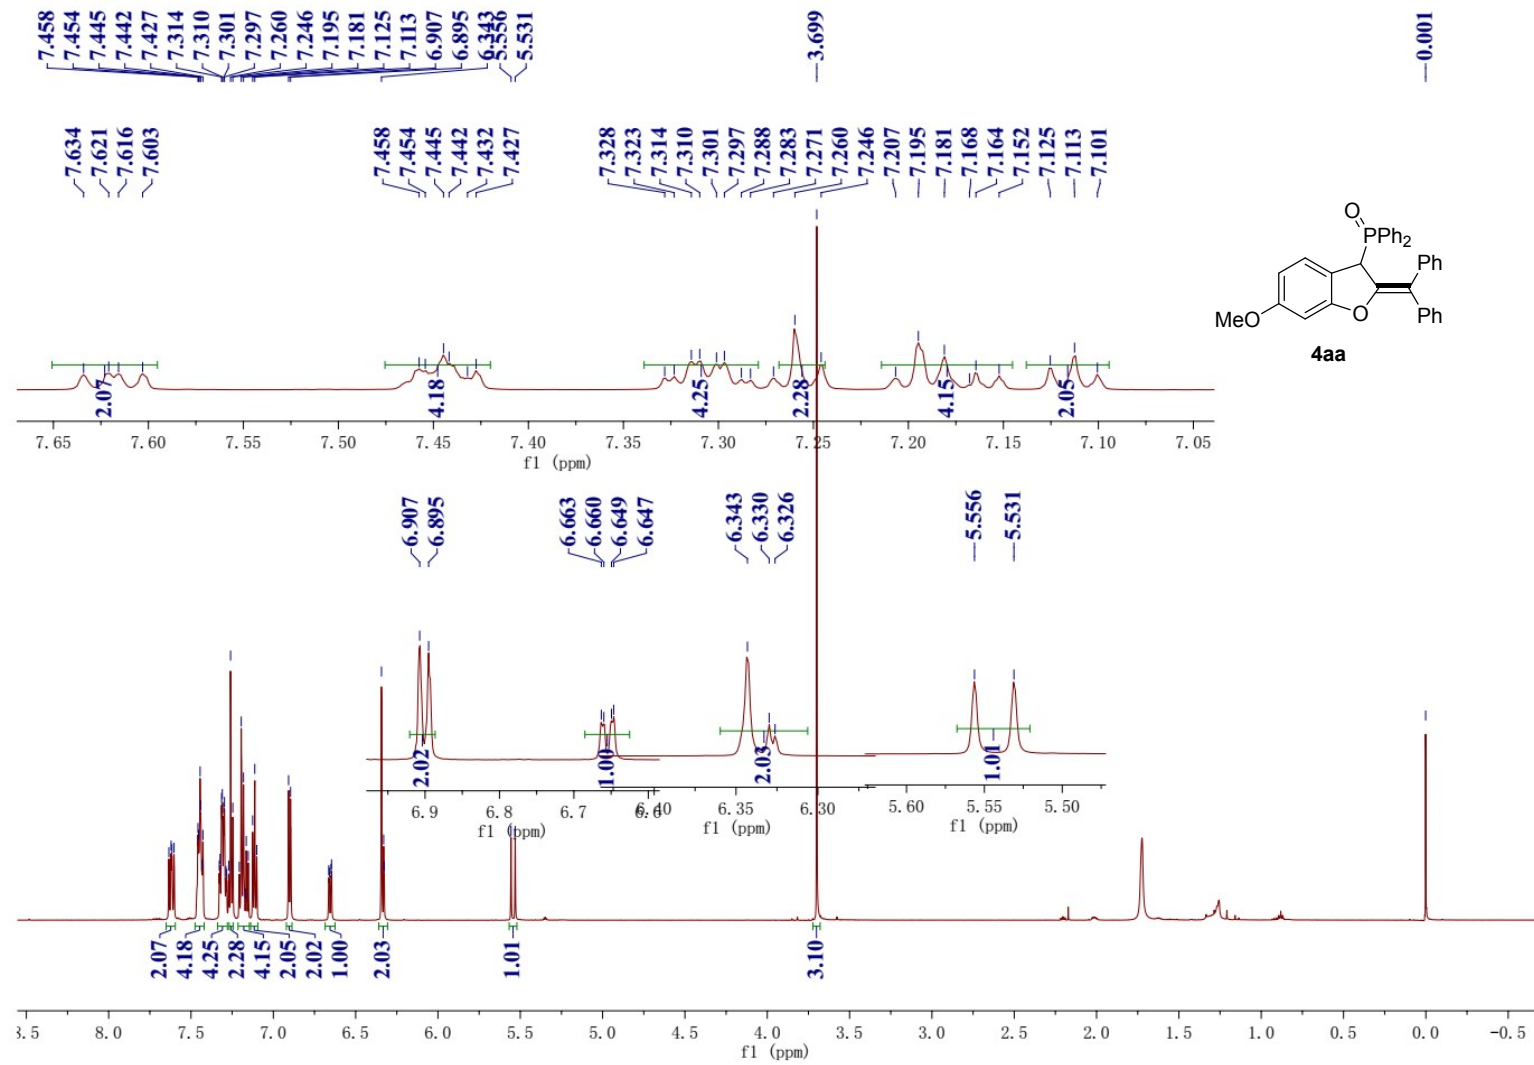

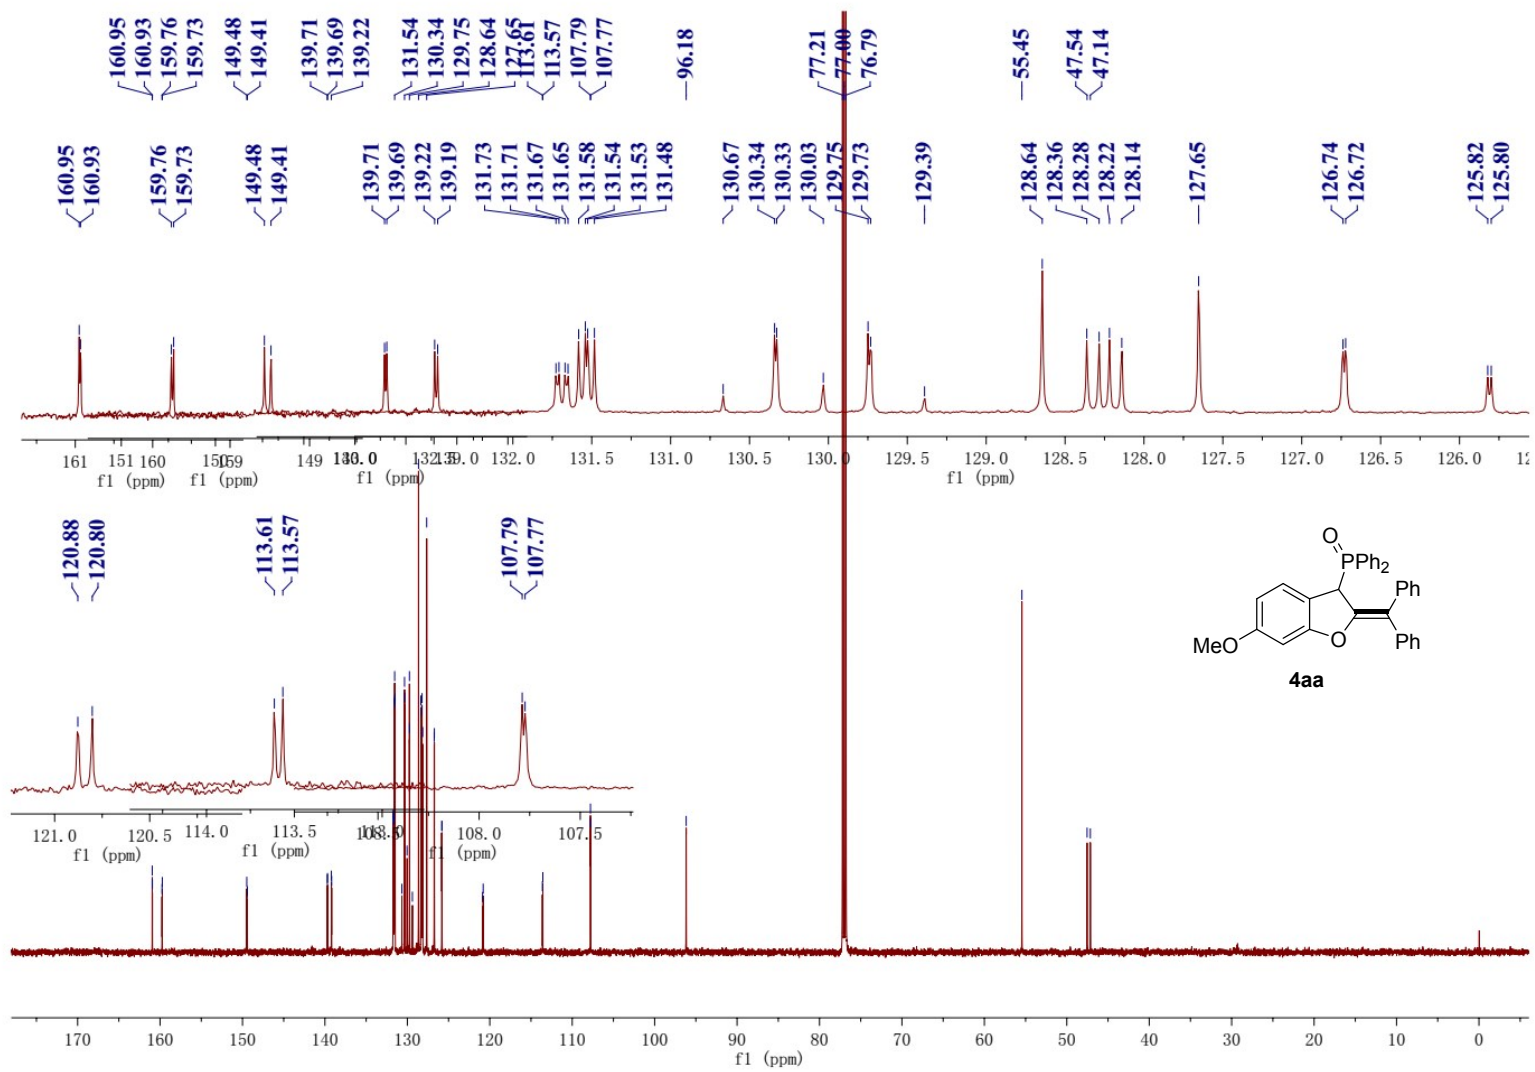

-29.53

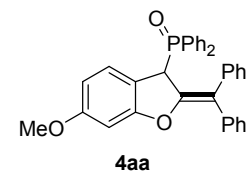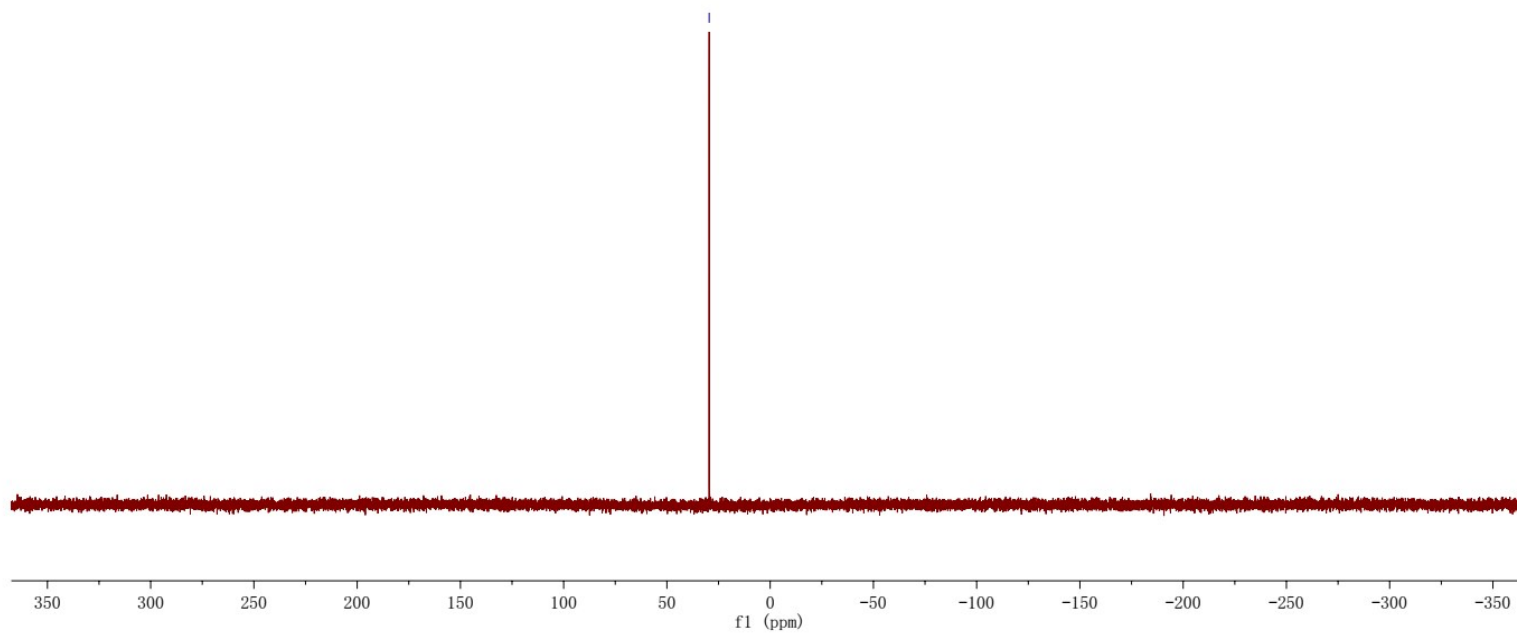



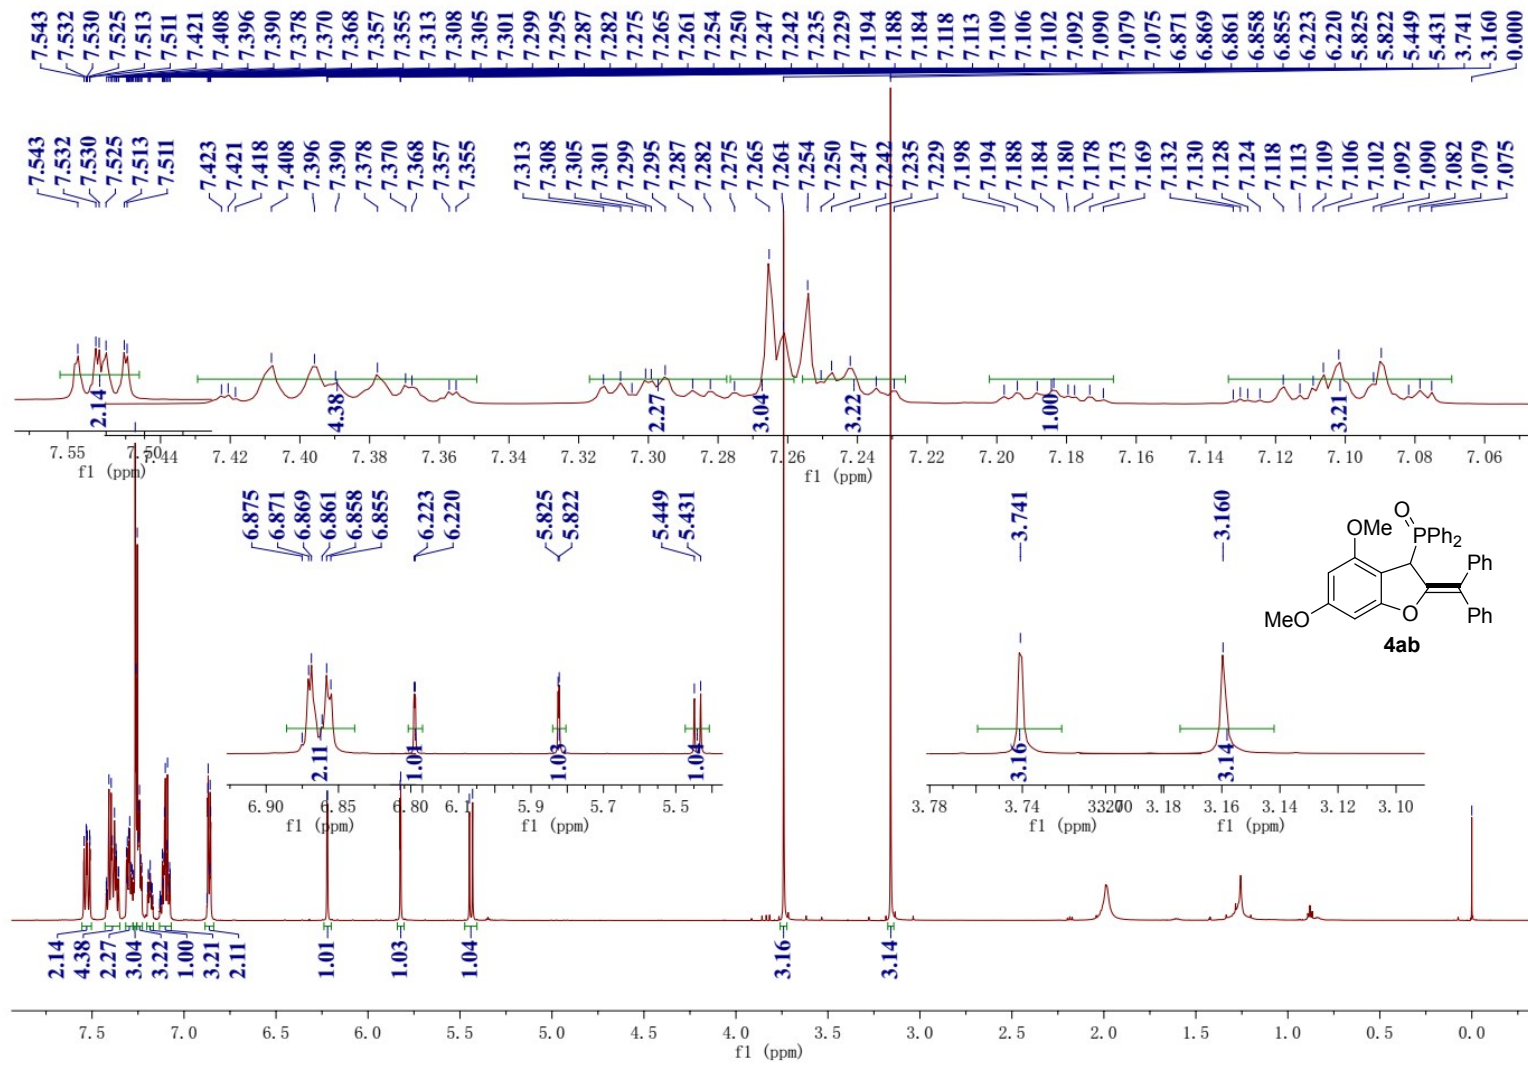

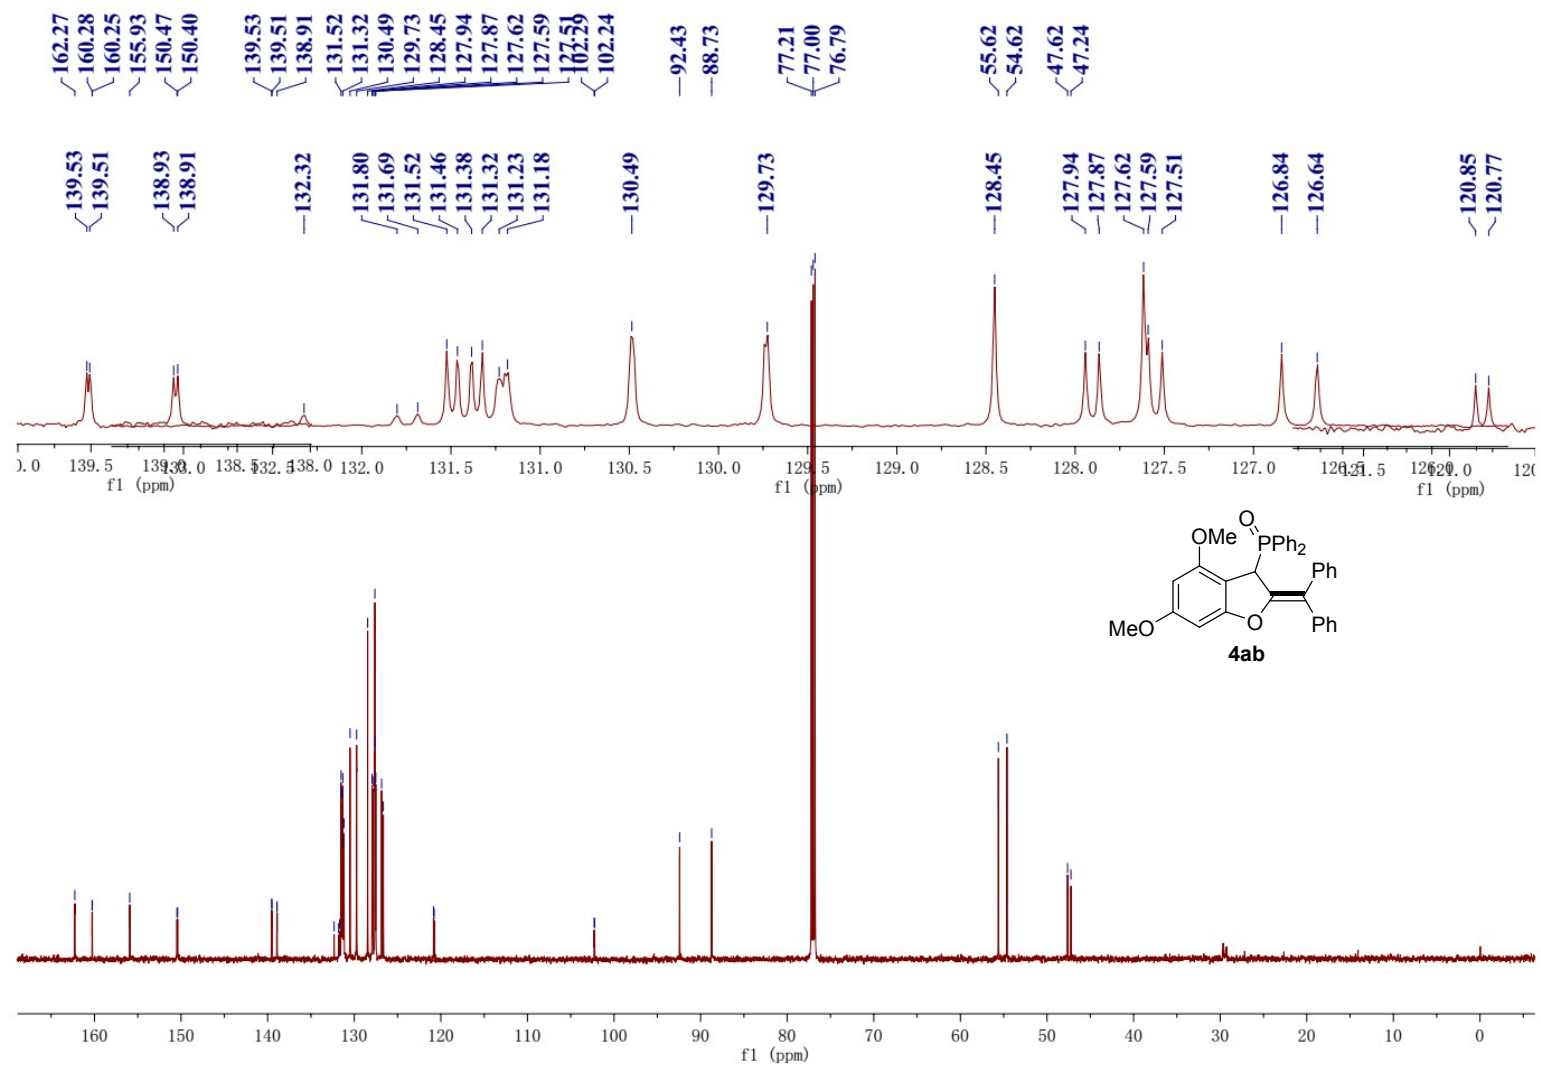

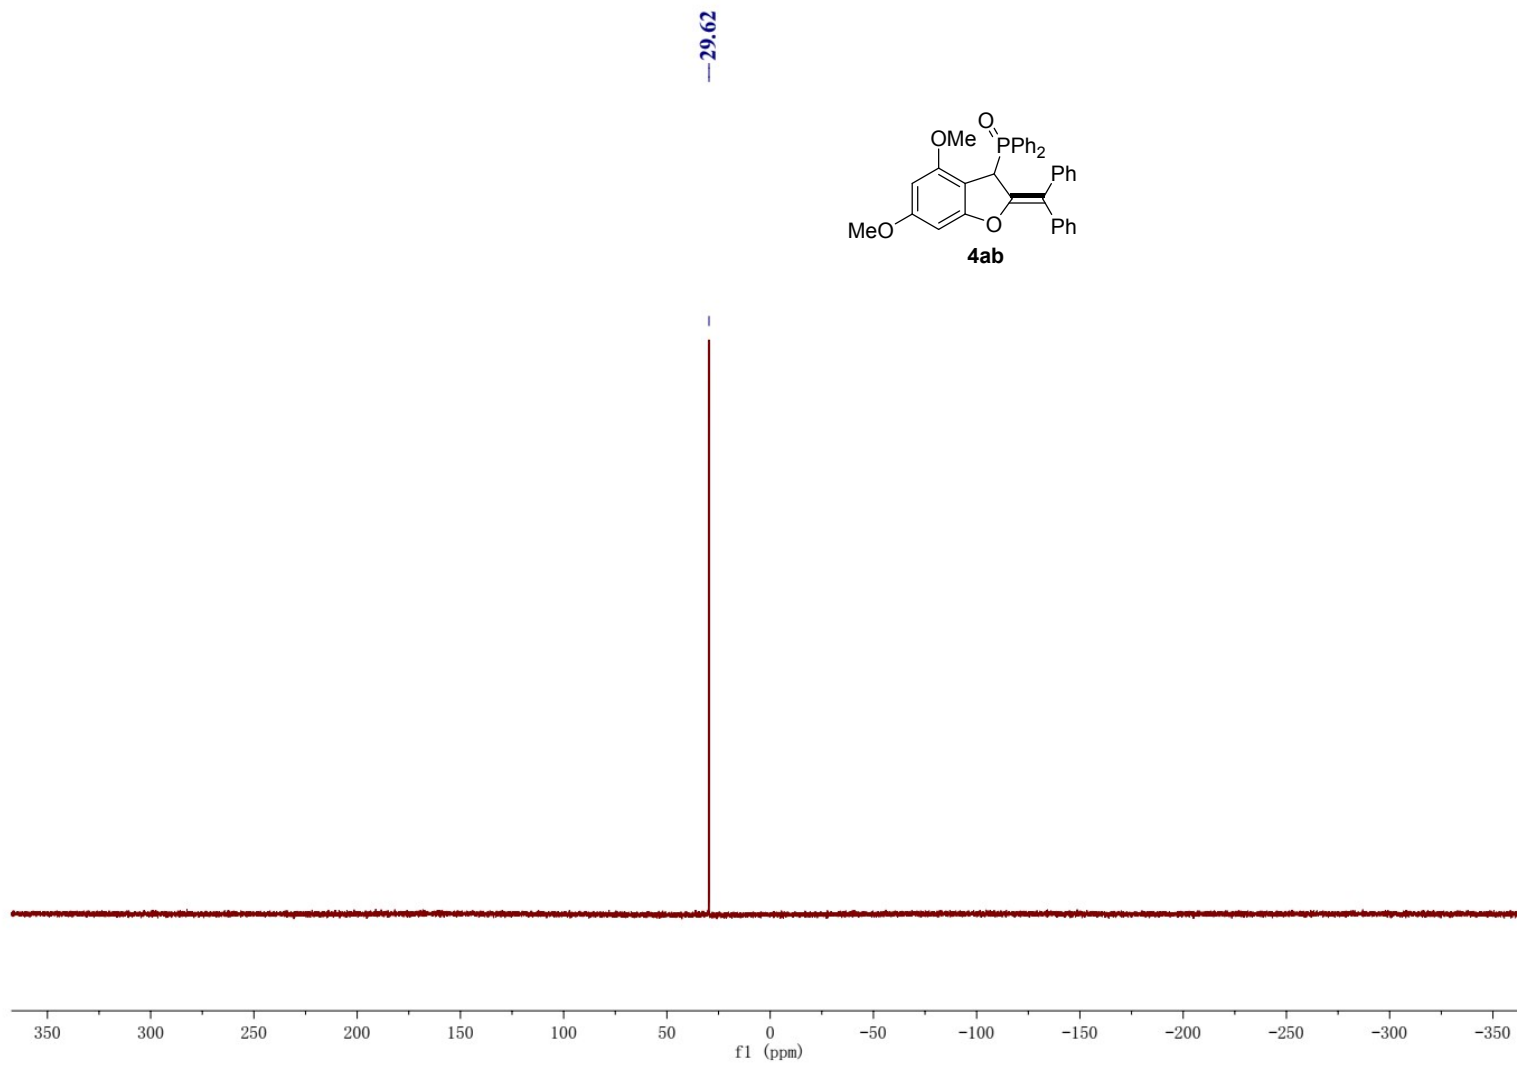

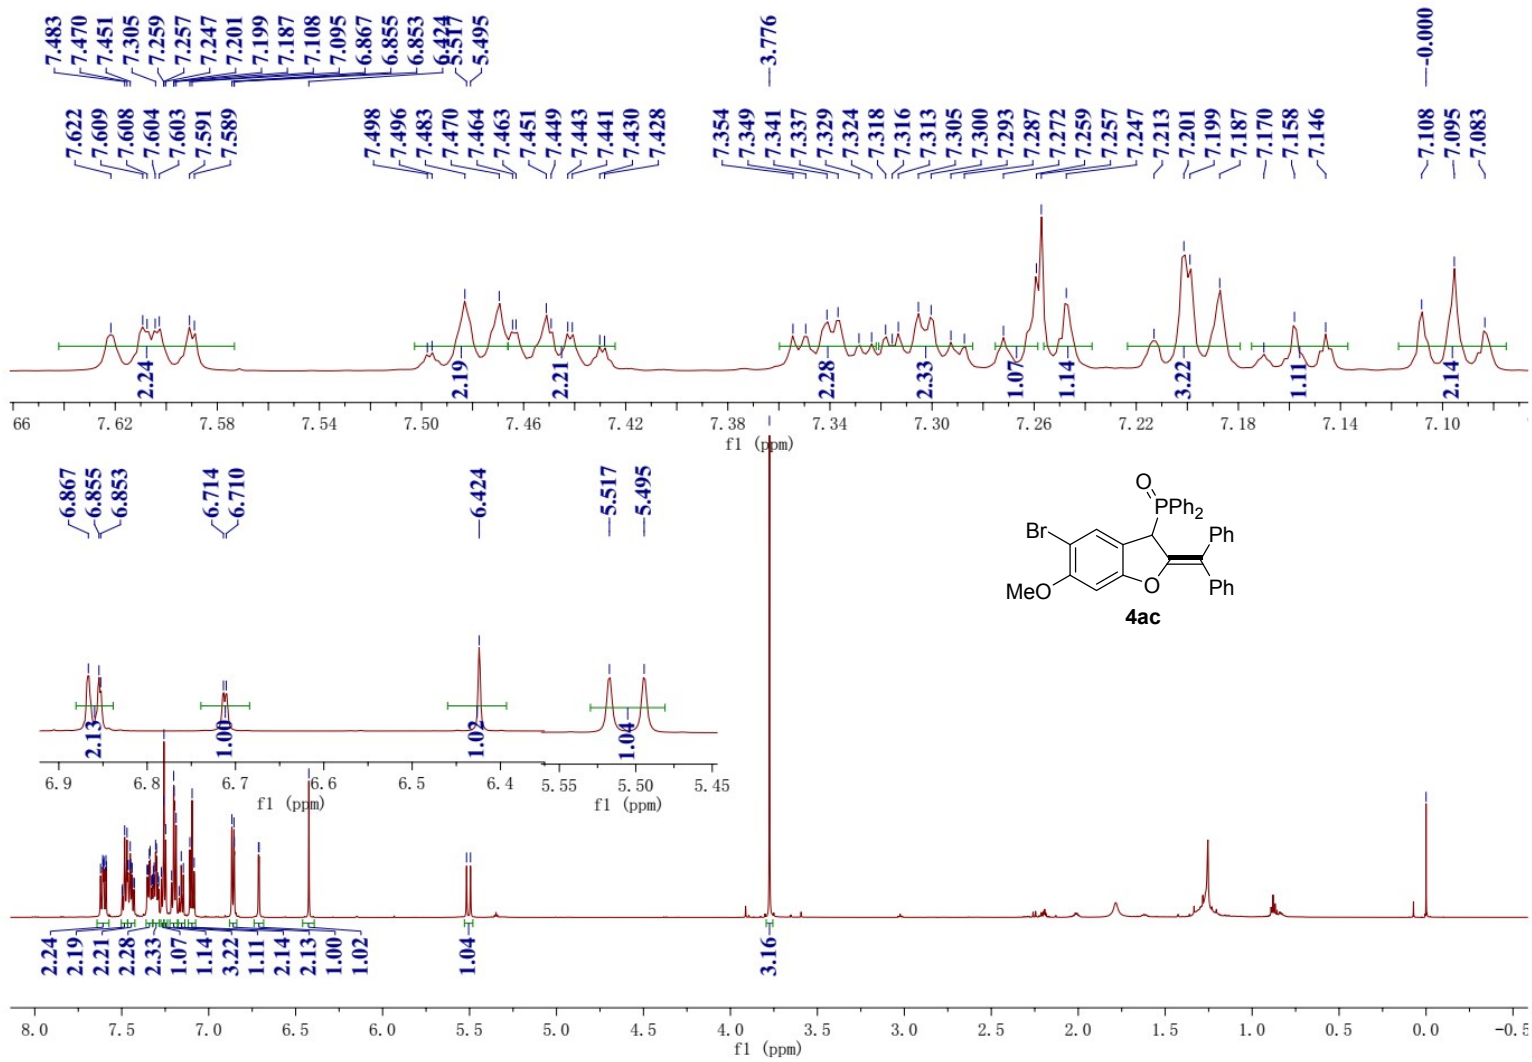

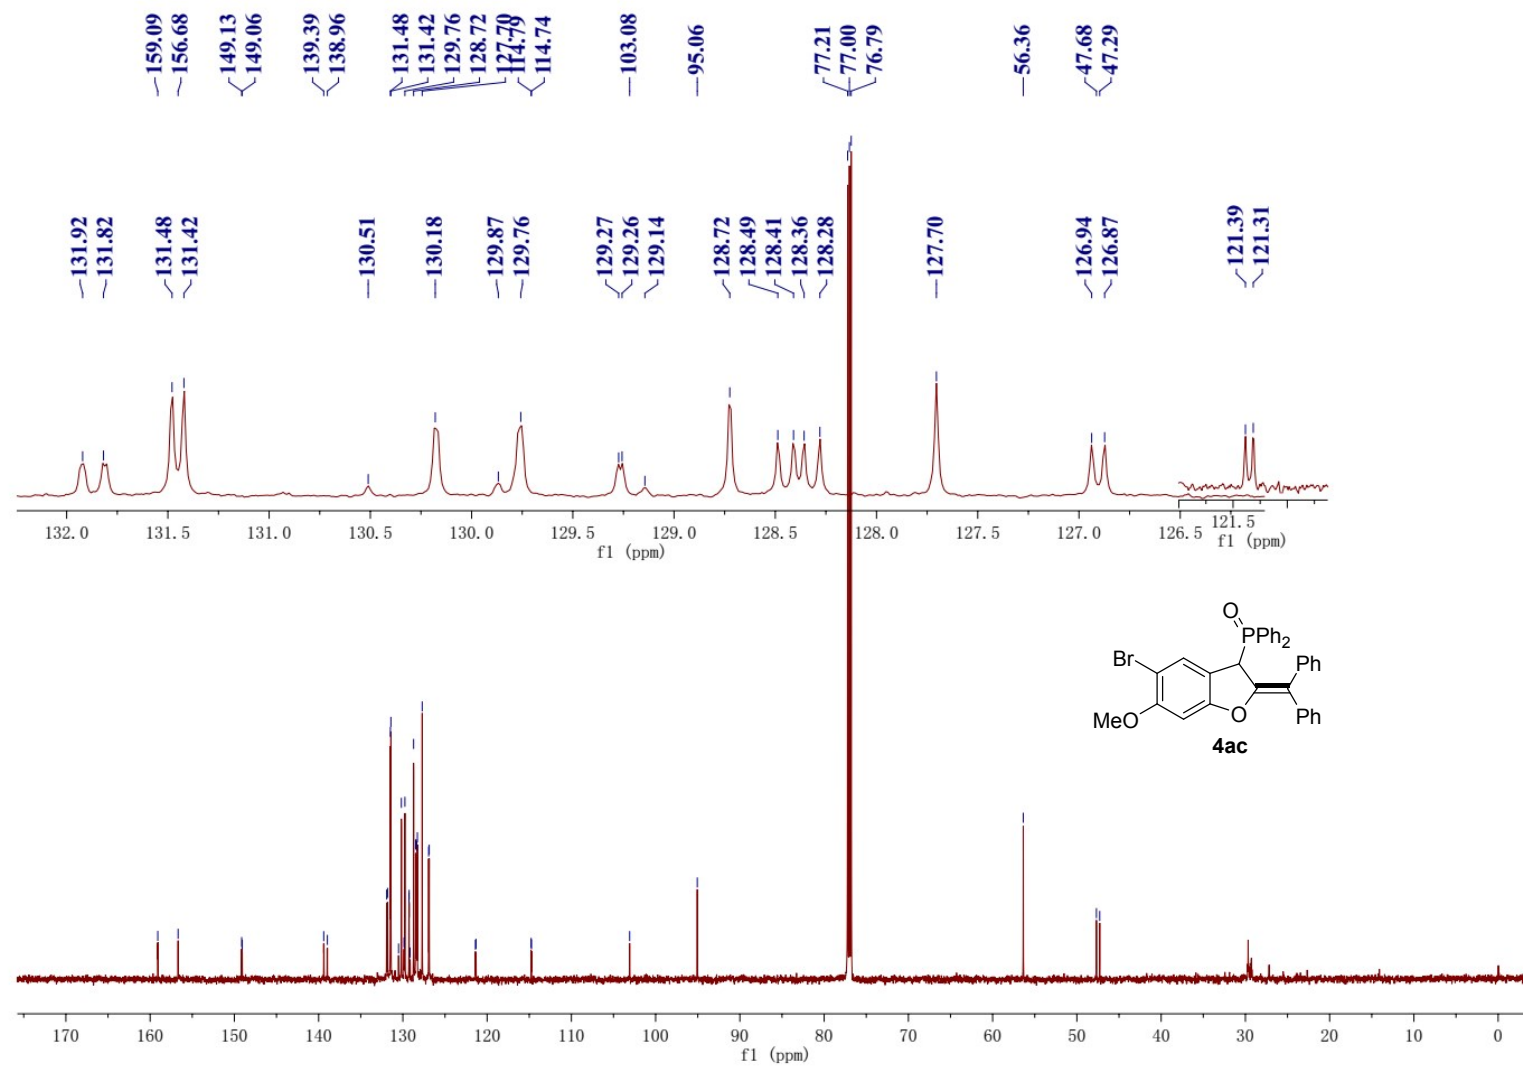

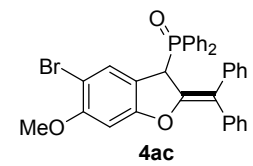

—28.97

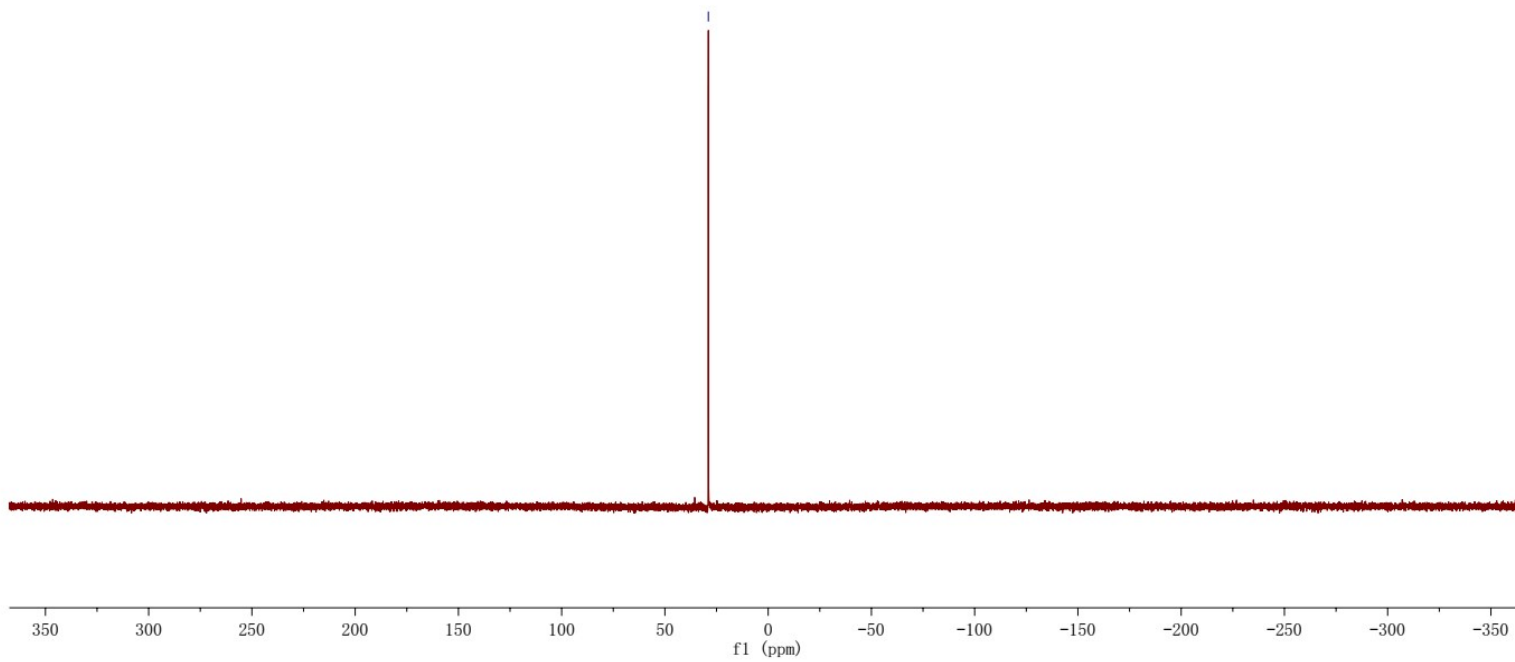

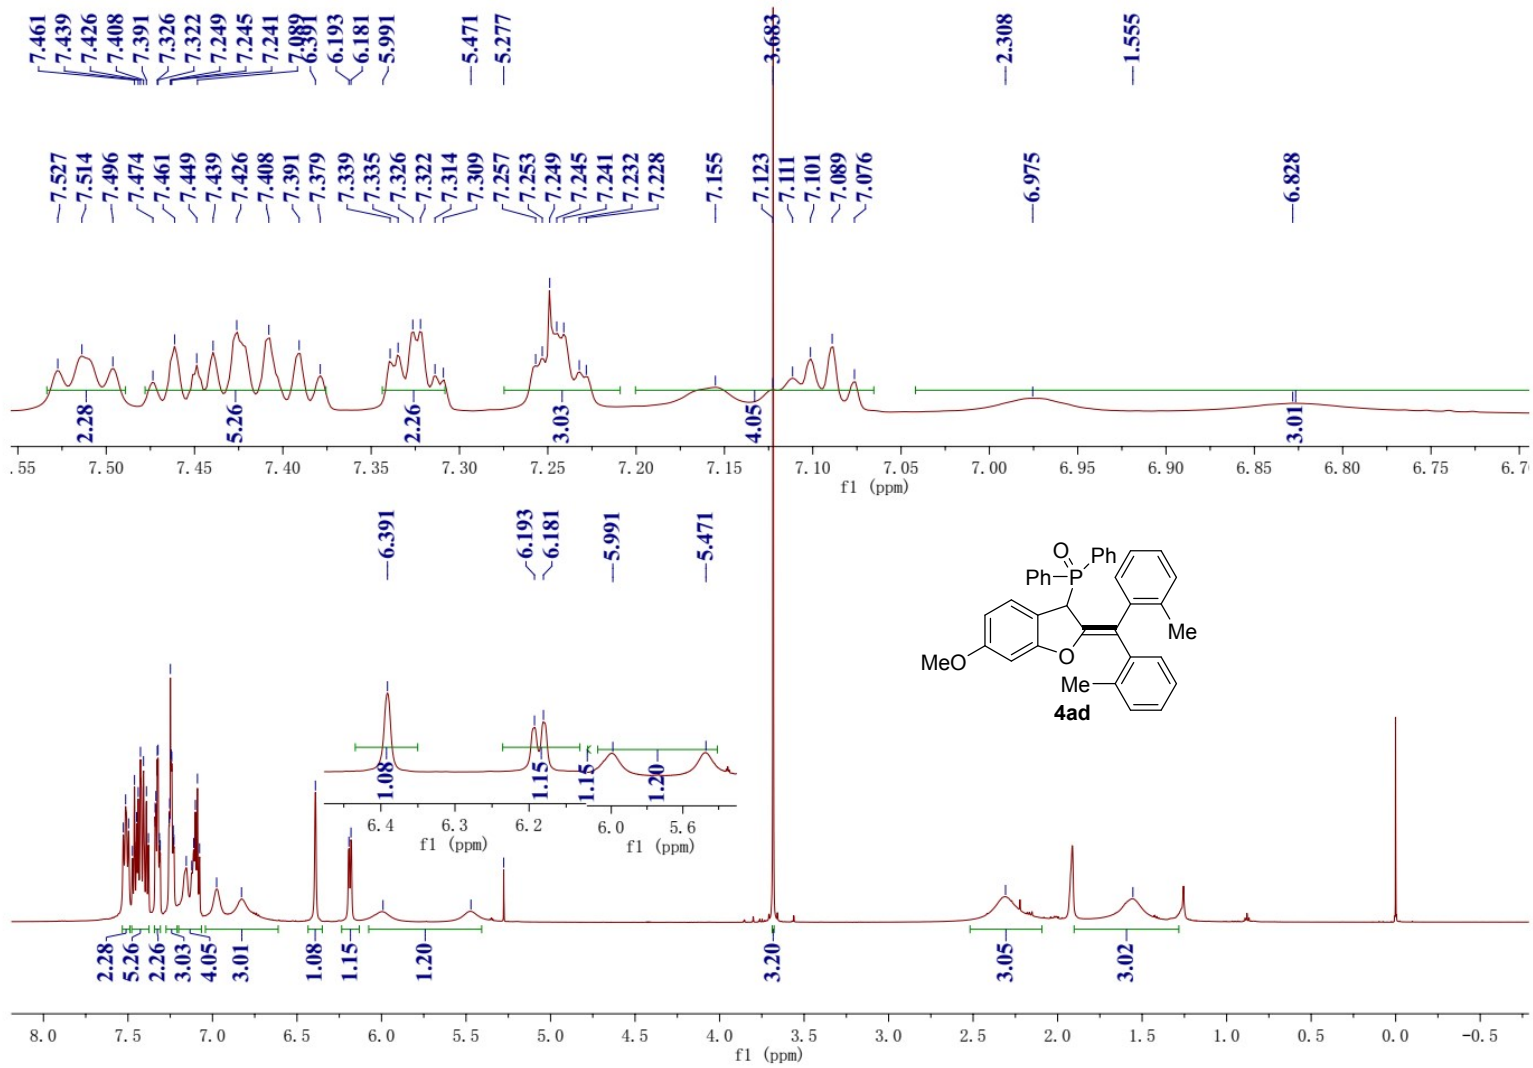

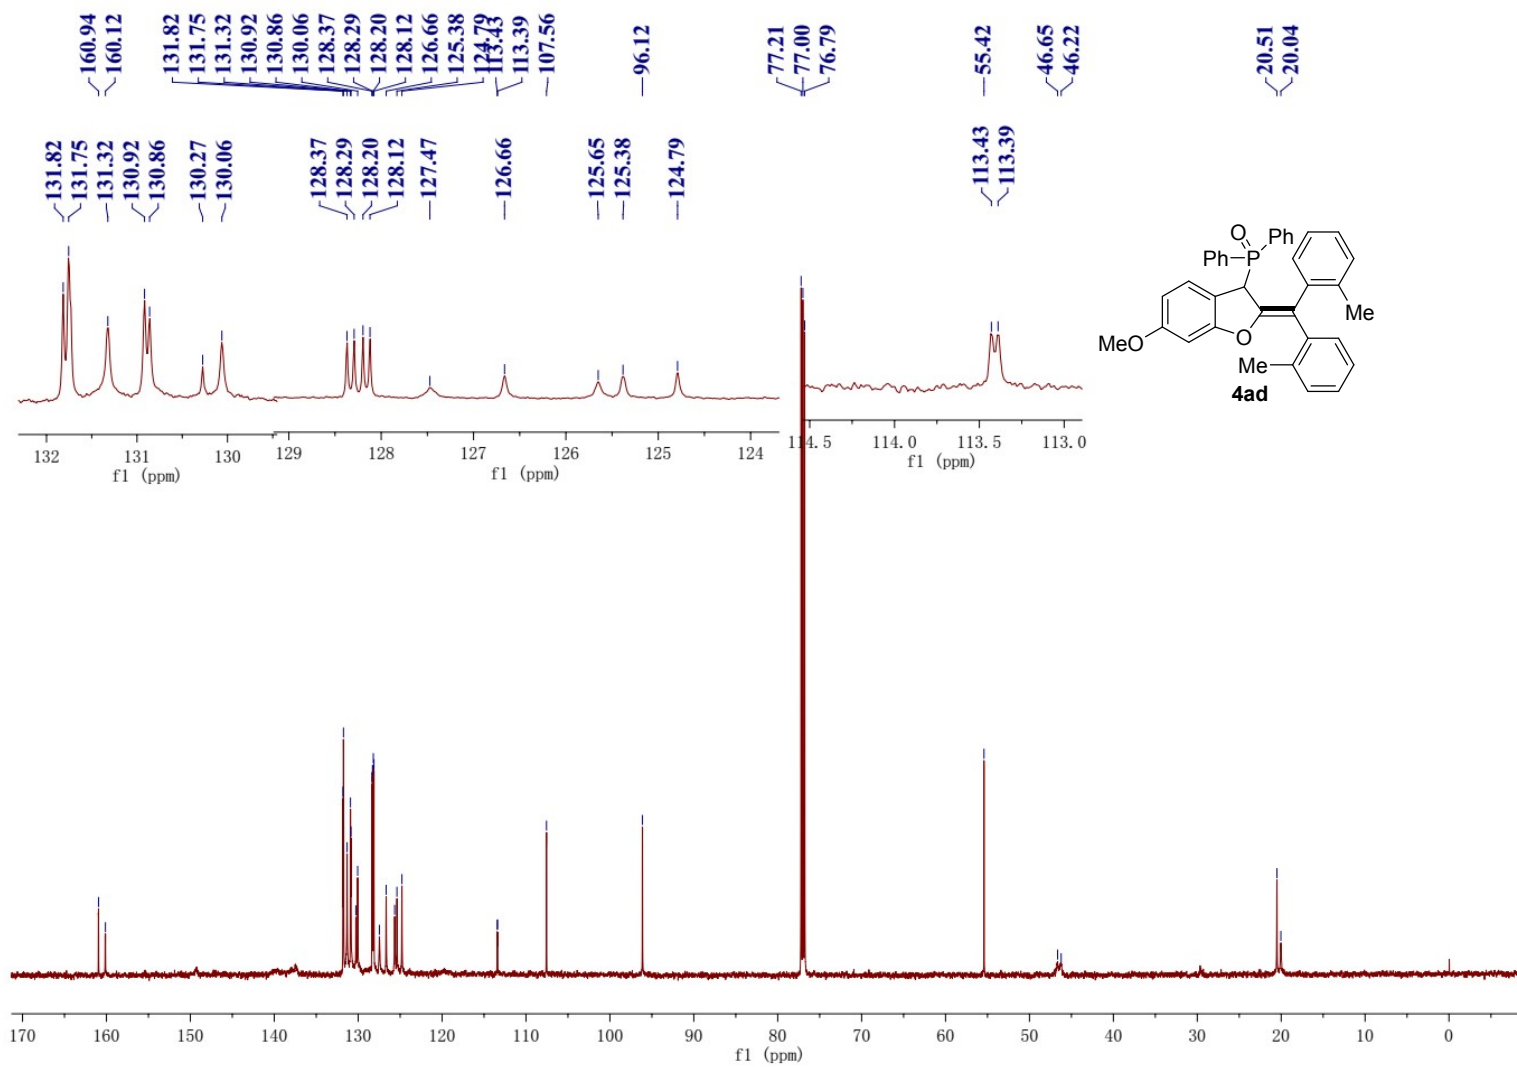



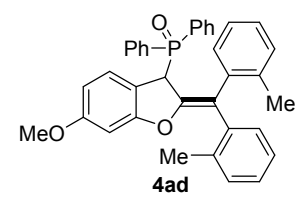

—28.13

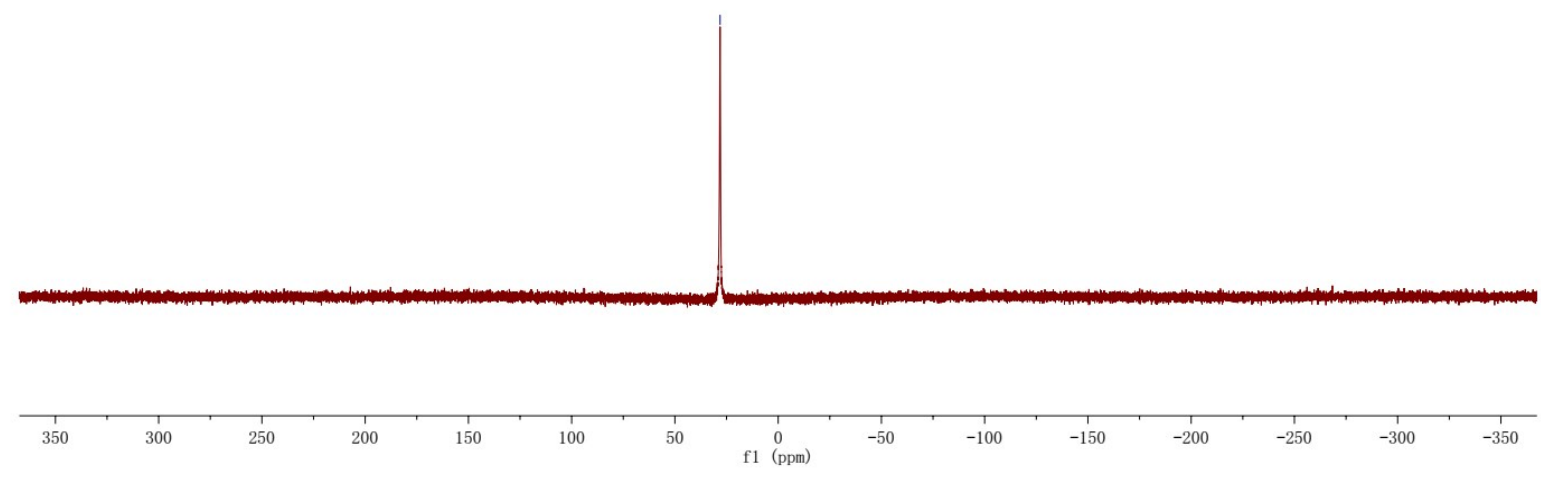

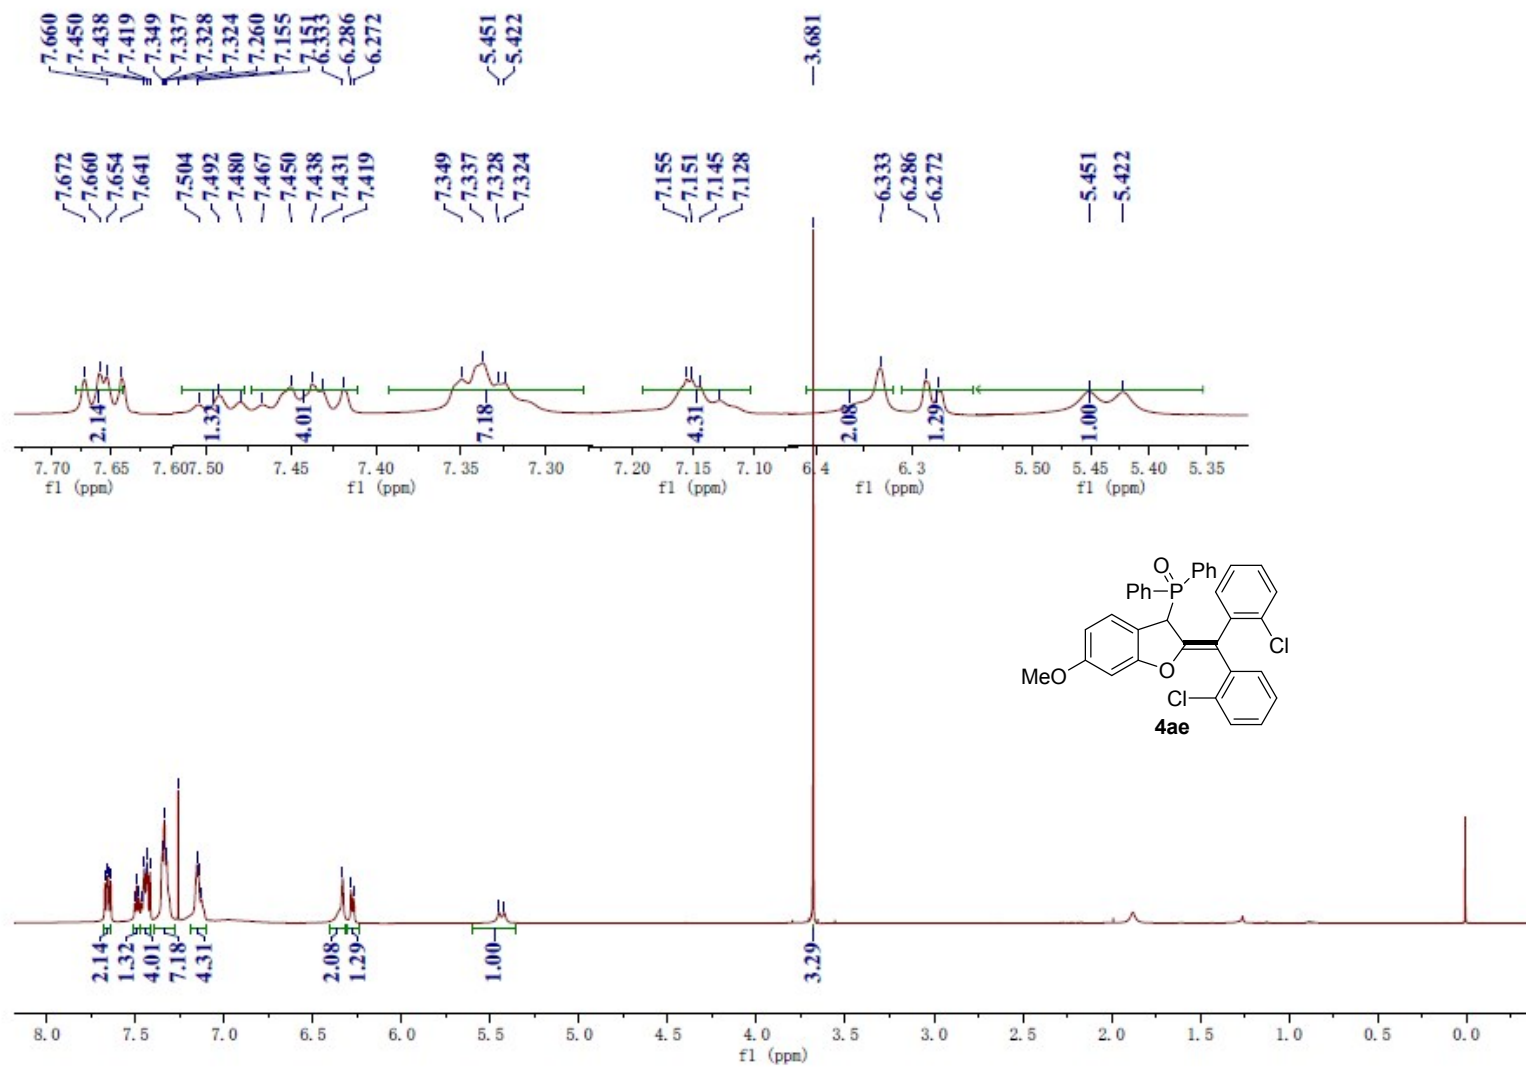

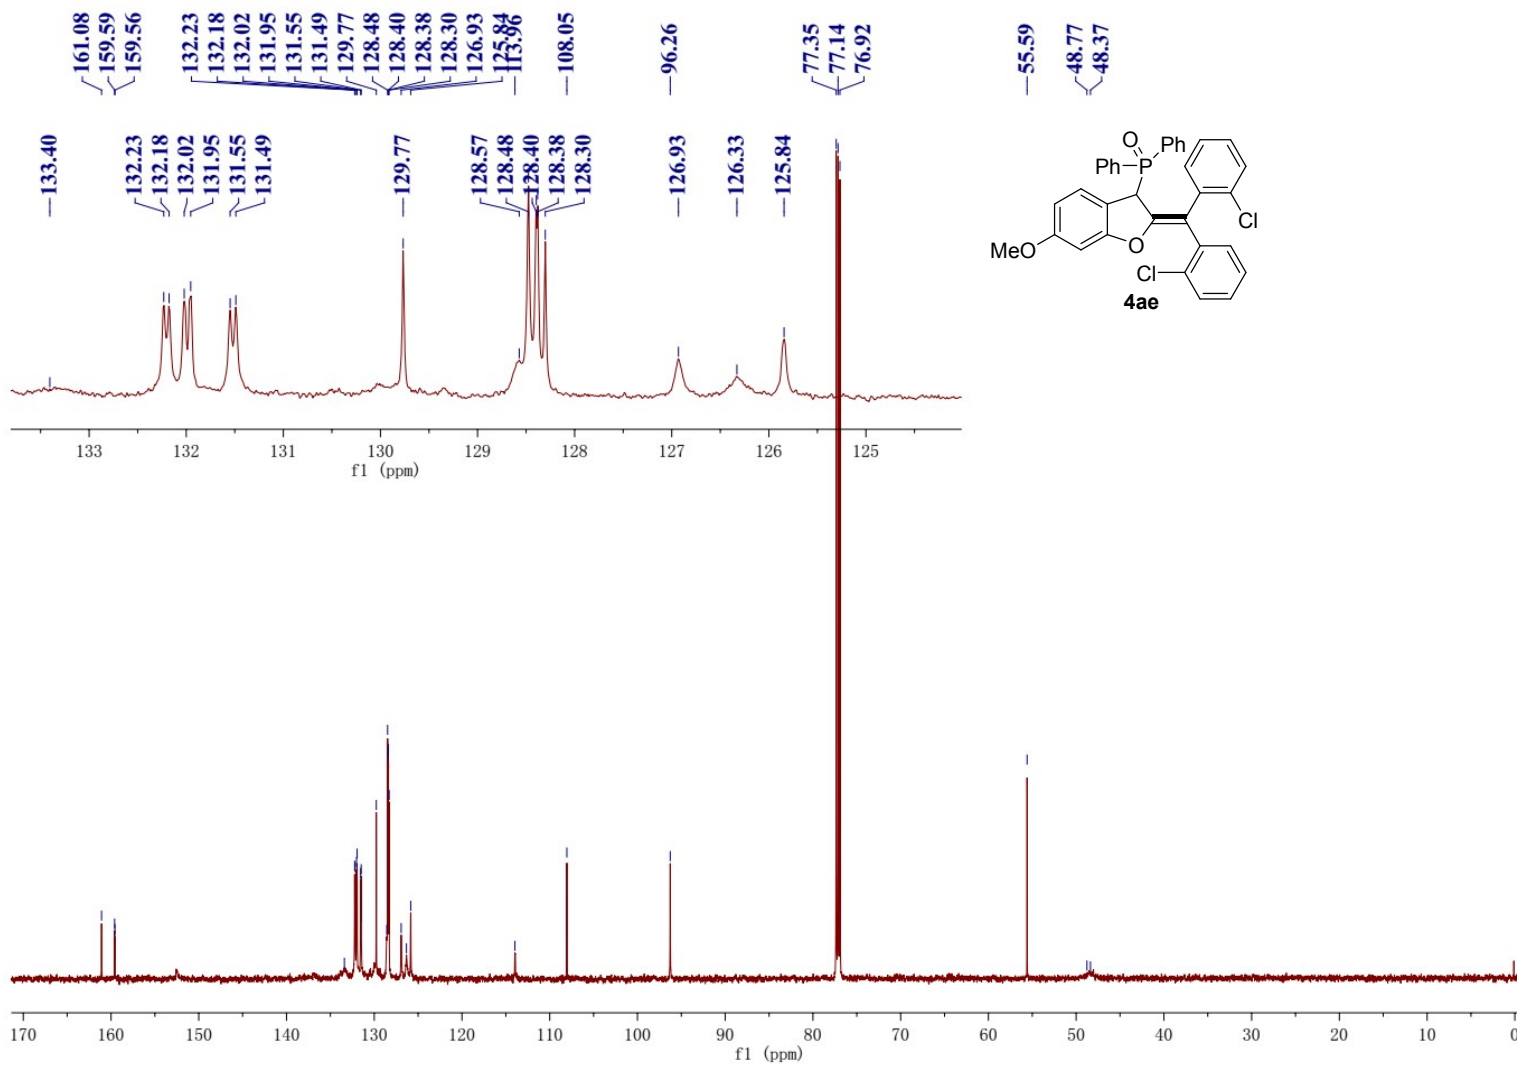

— 29.42

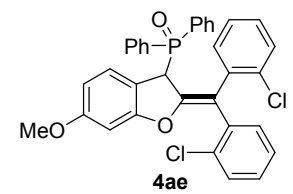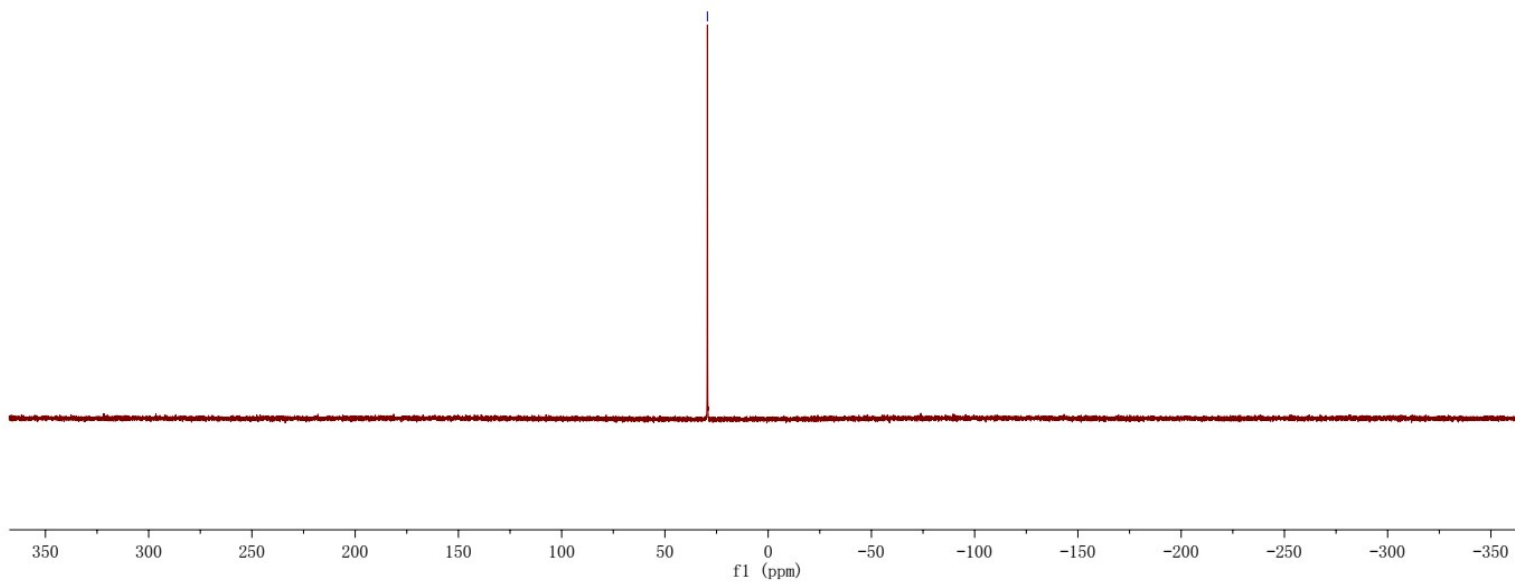

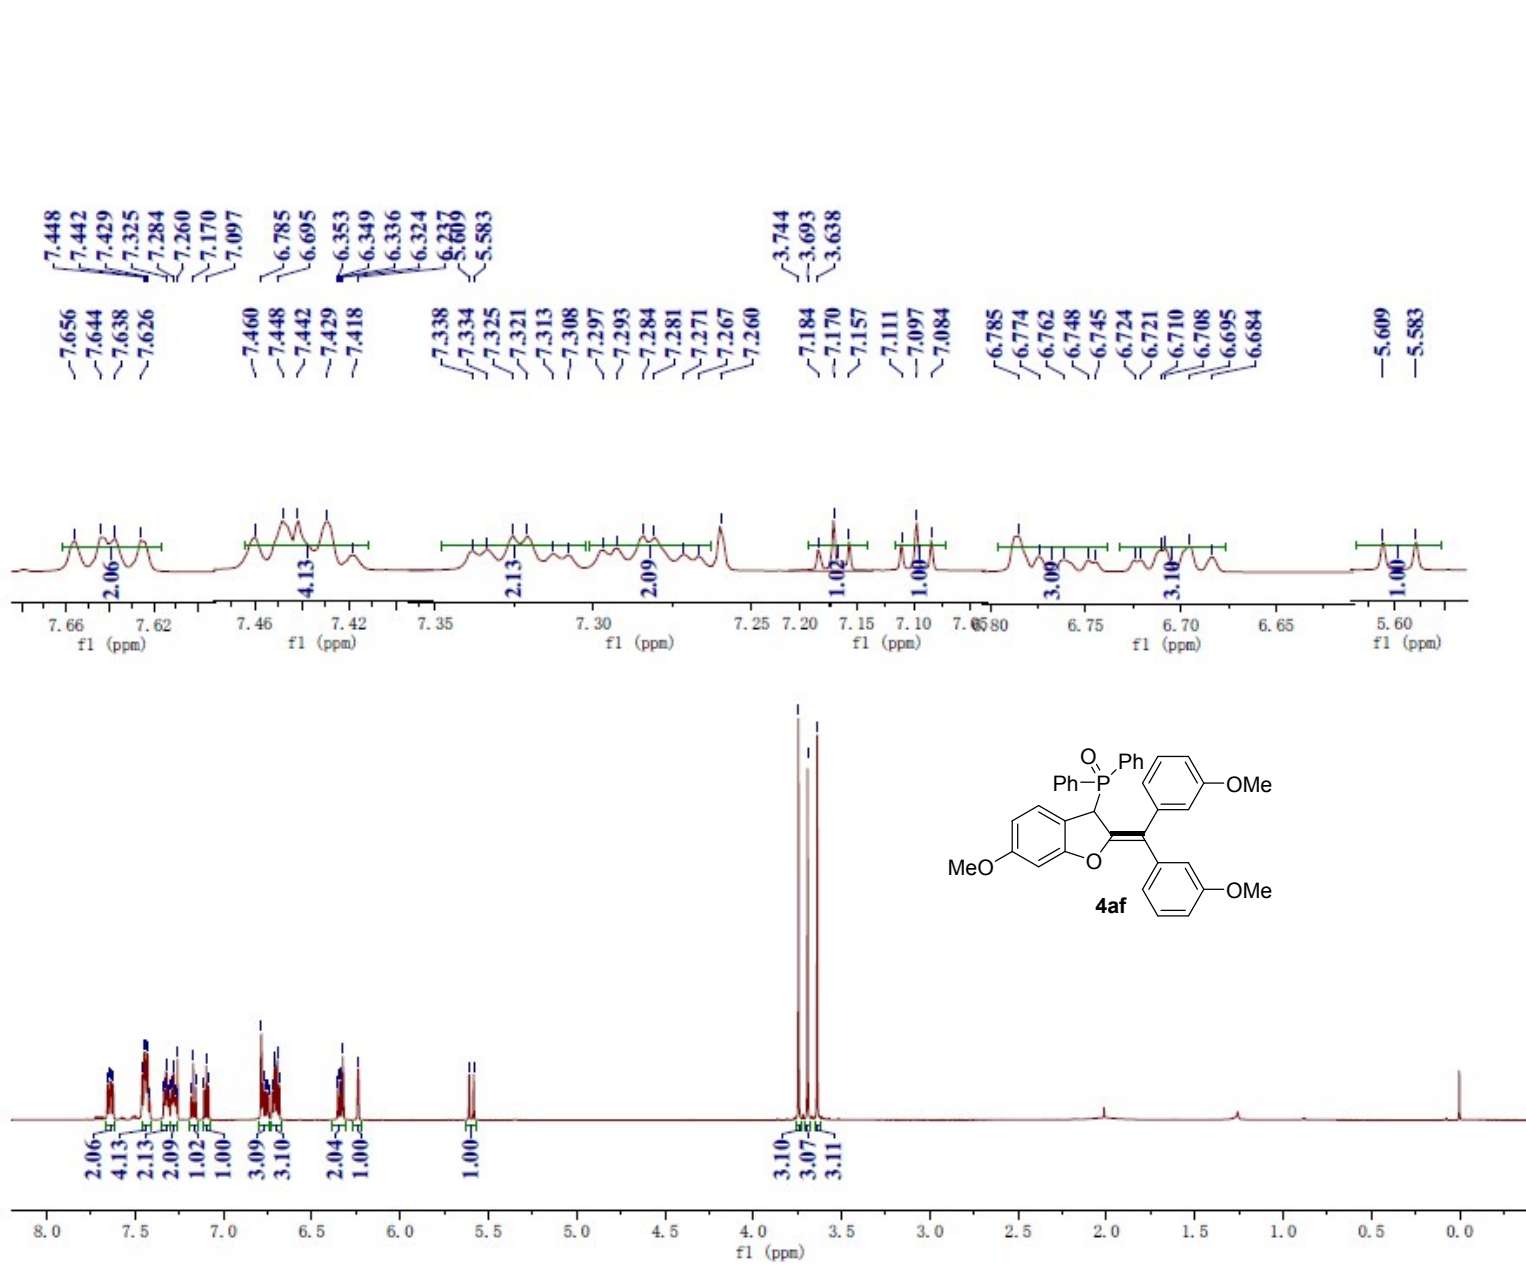

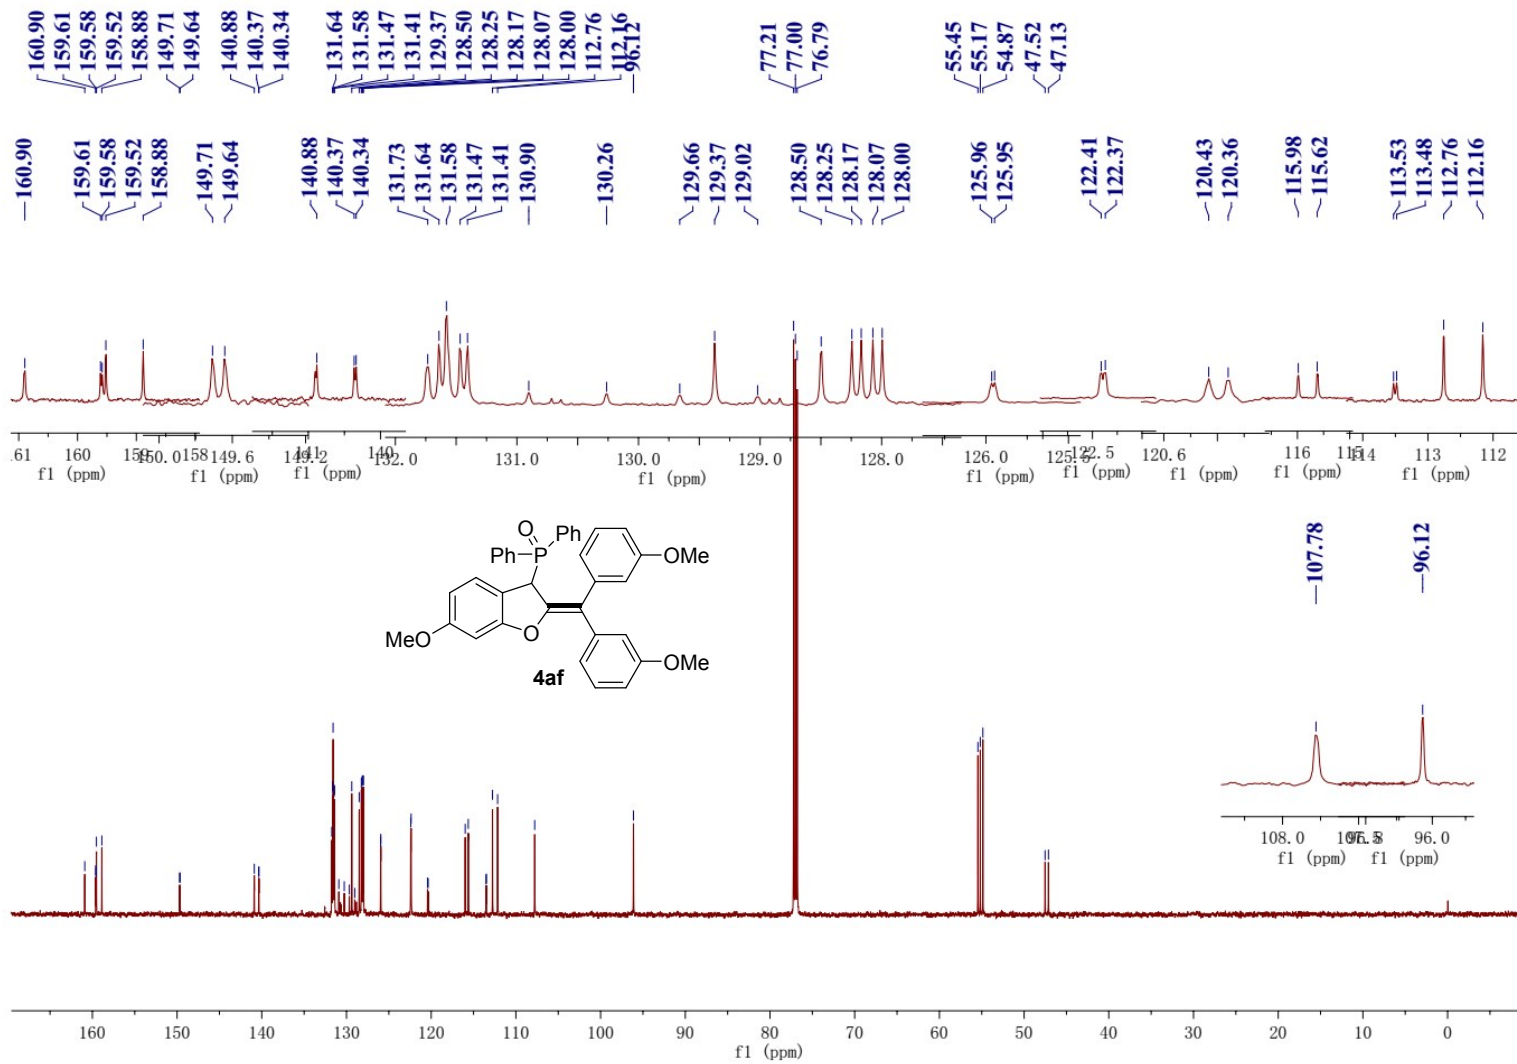

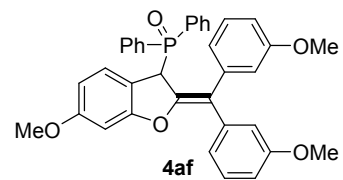

-29.57

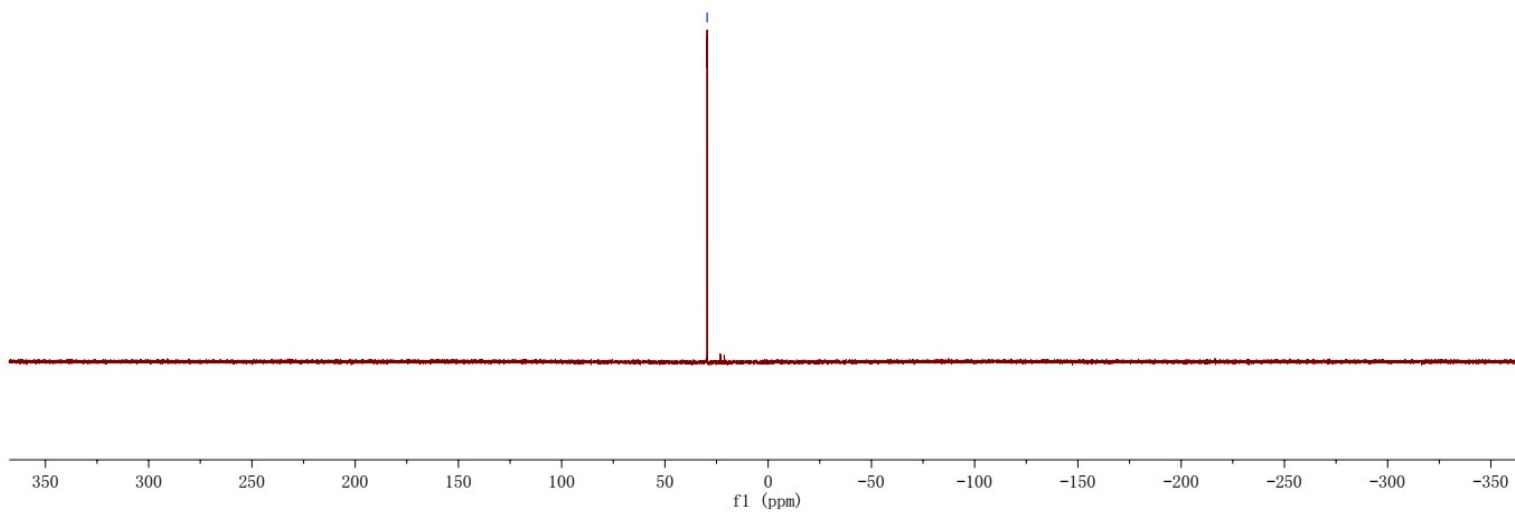

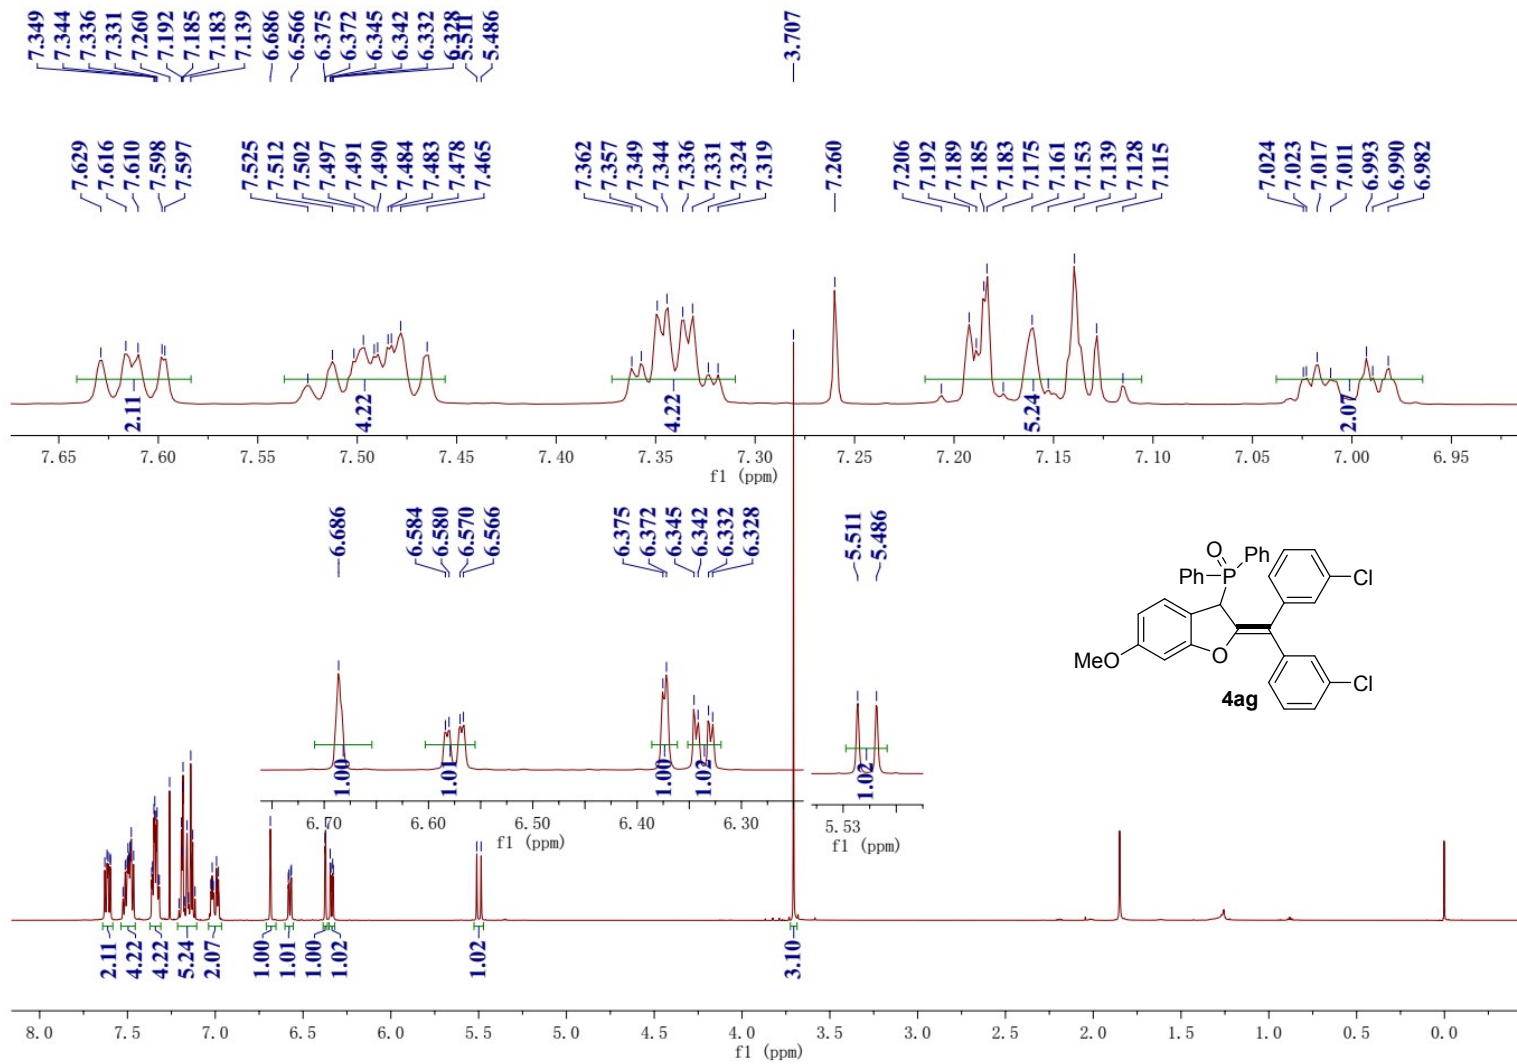



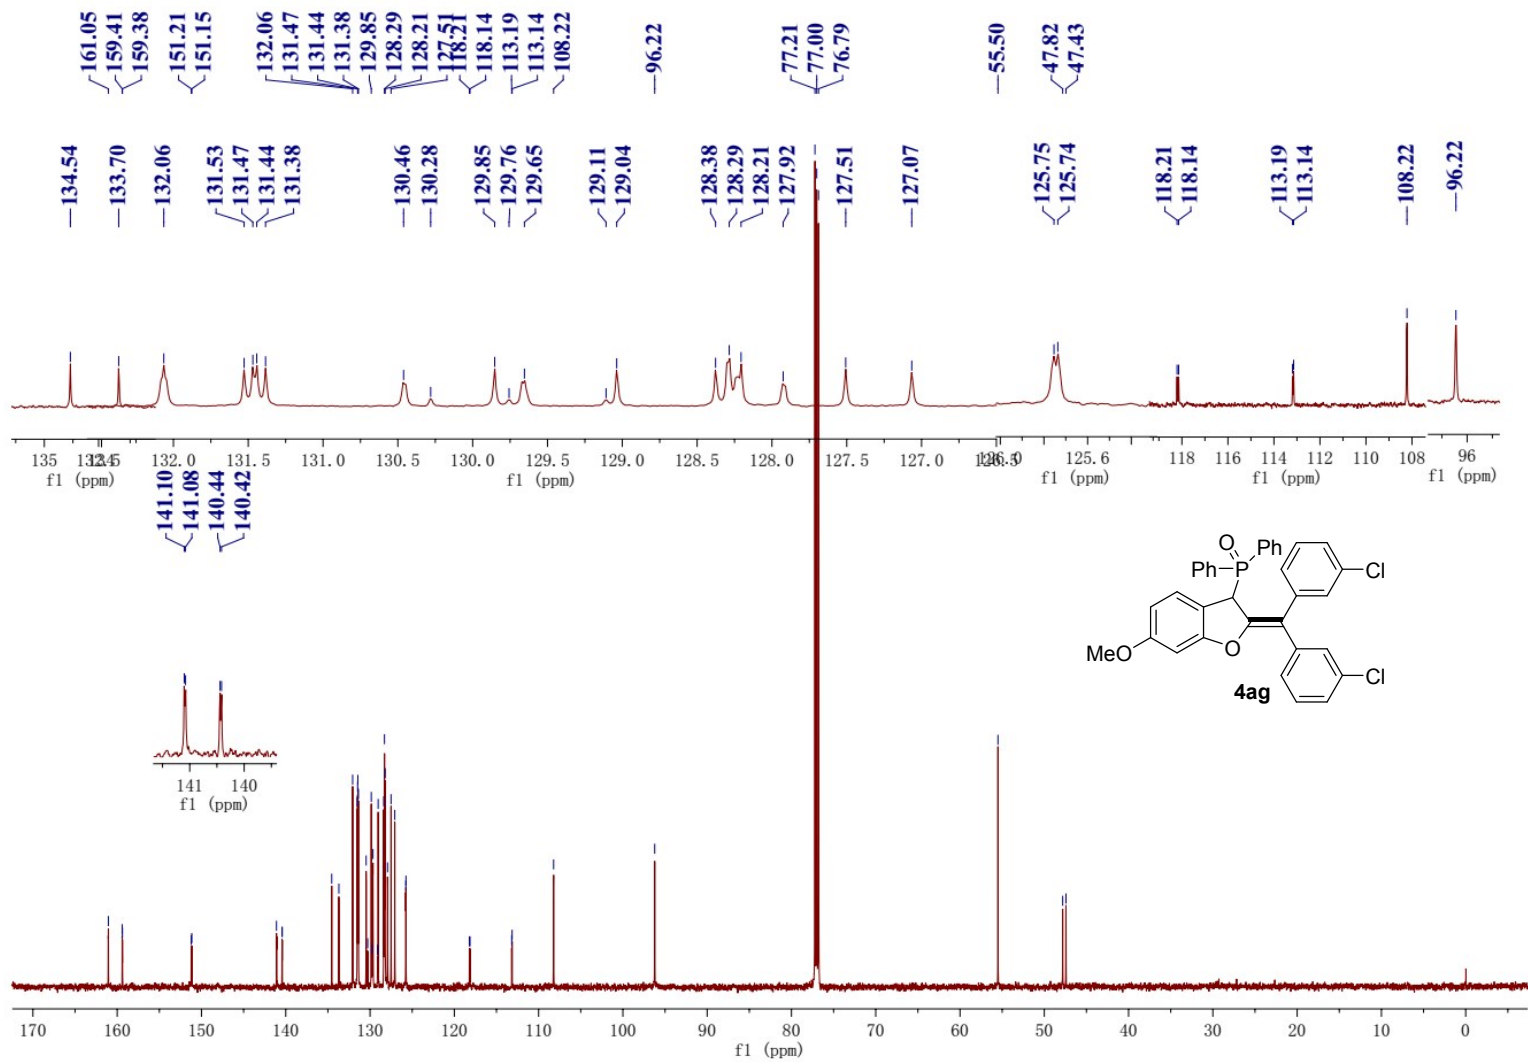

— 29.34

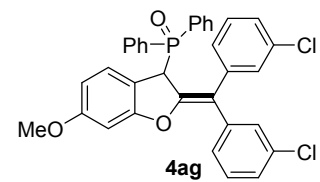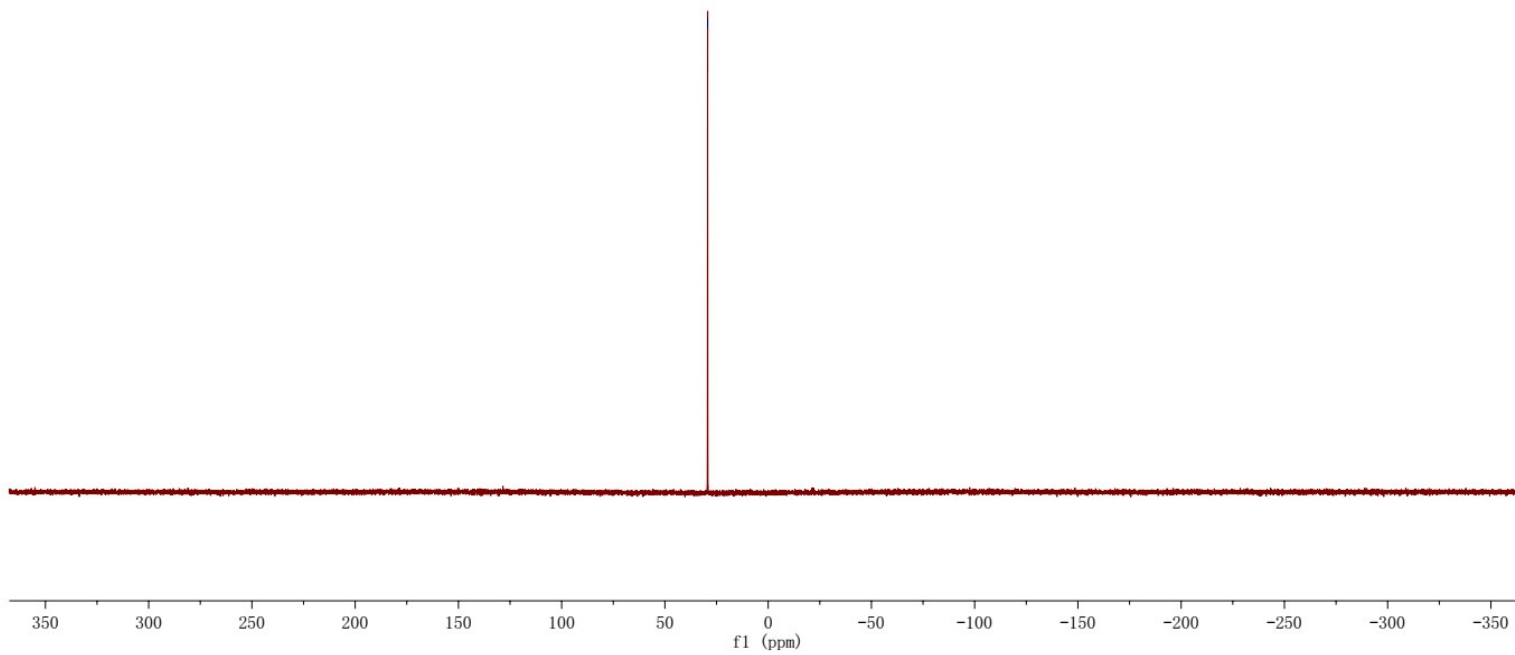

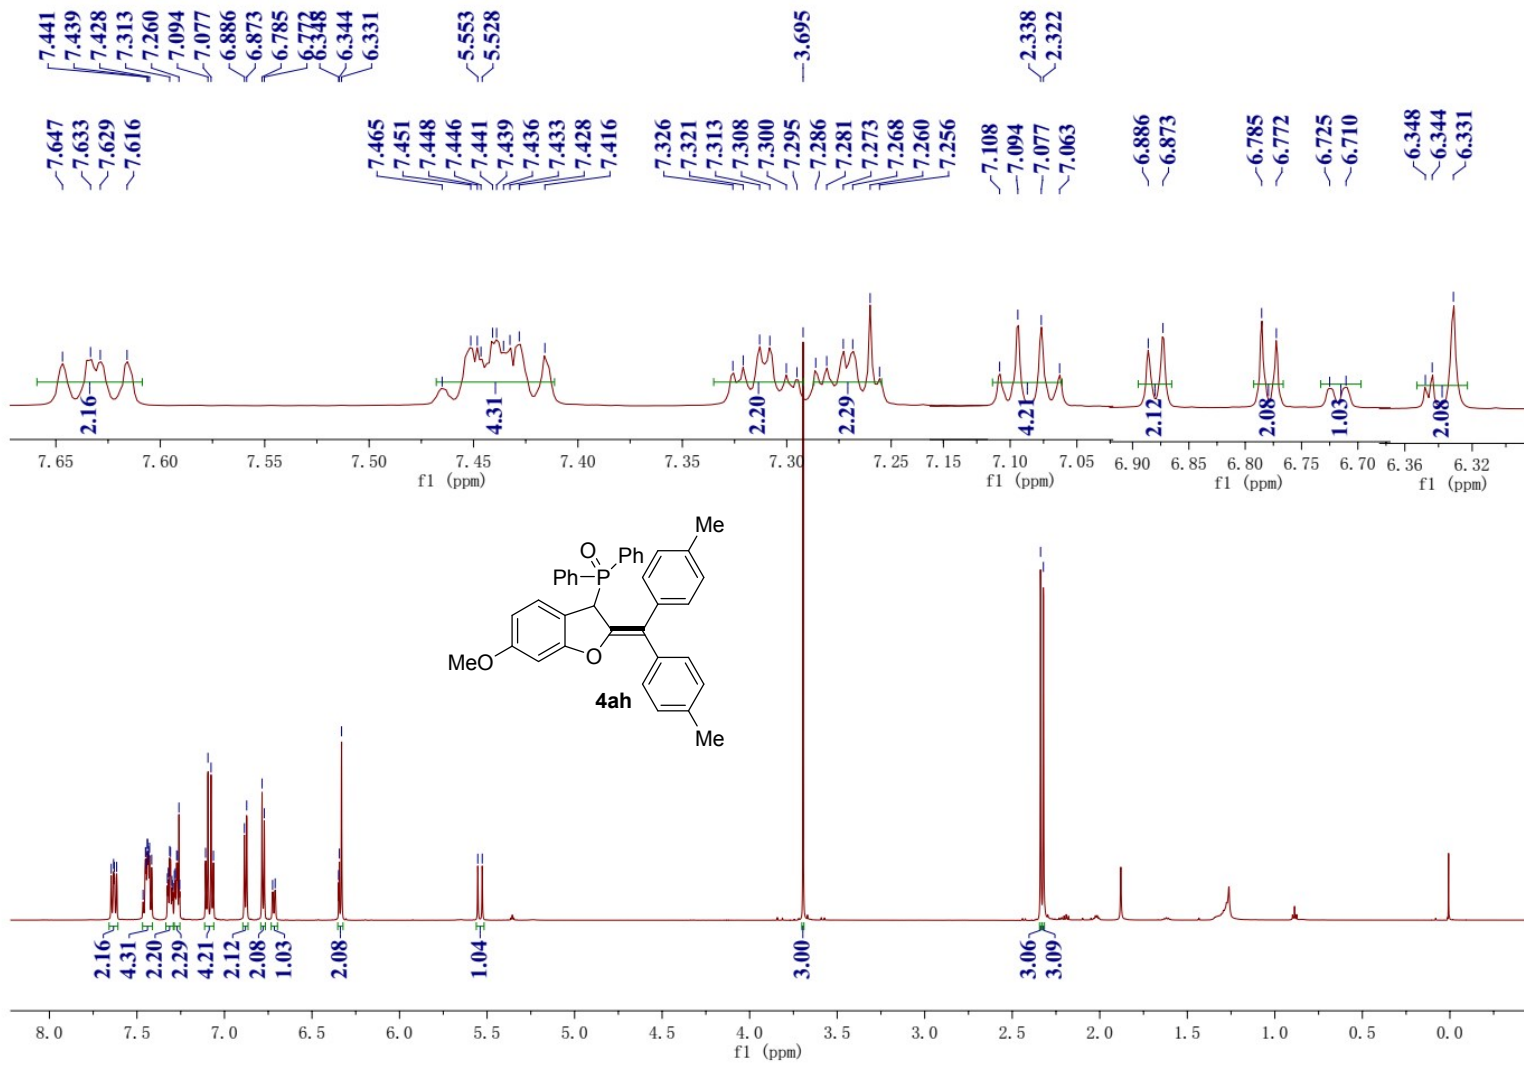

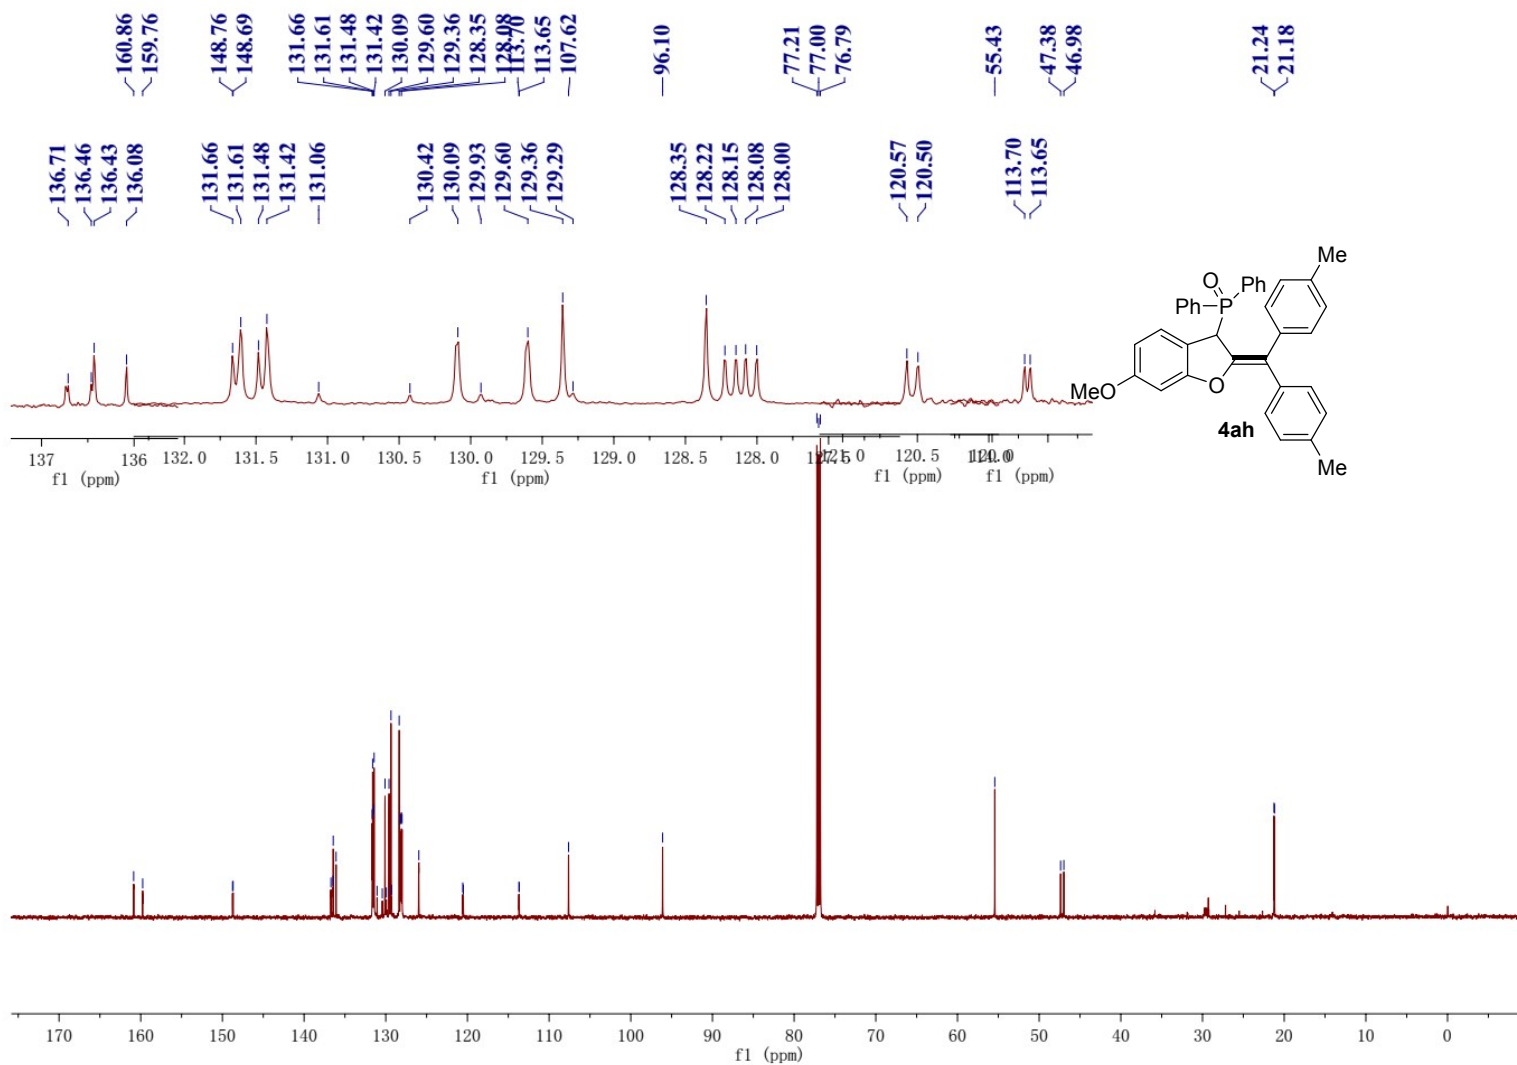

— 29.39

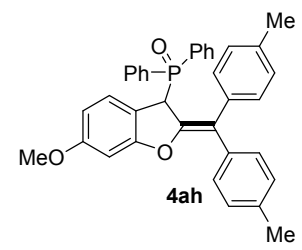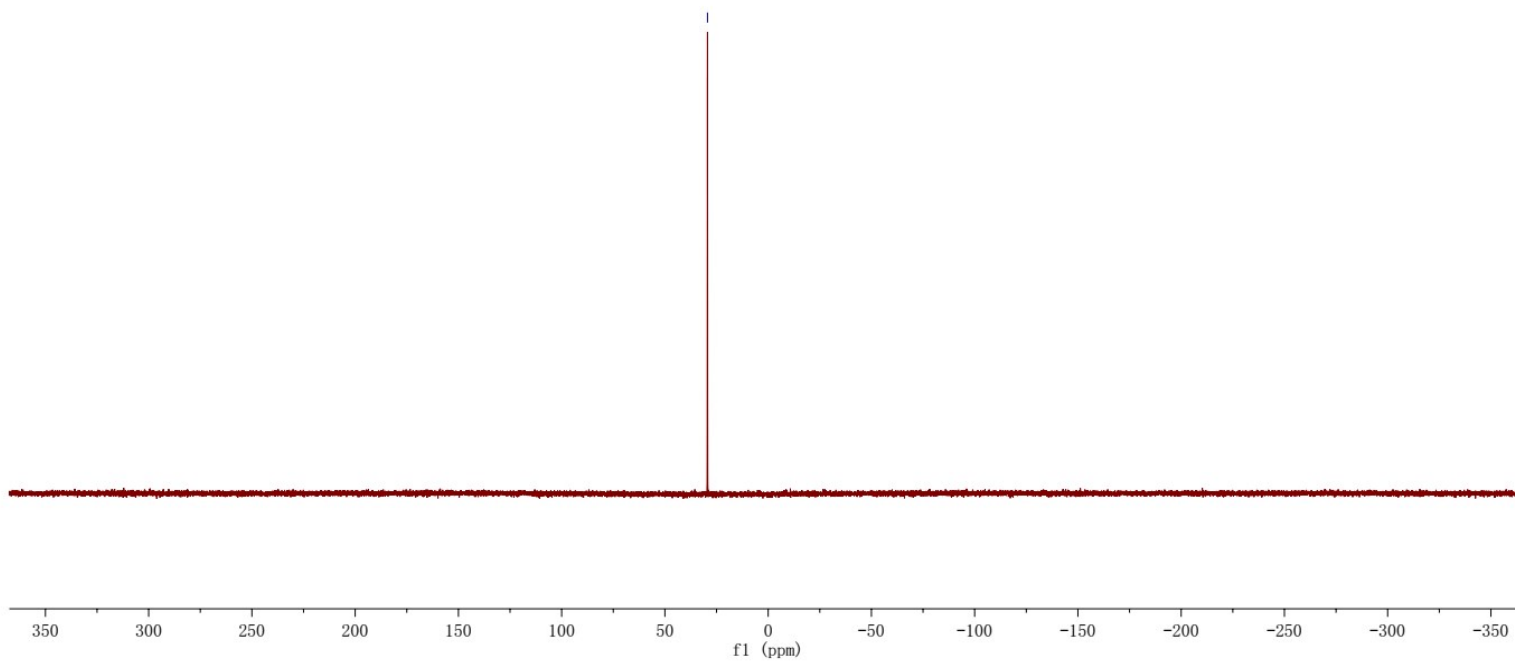

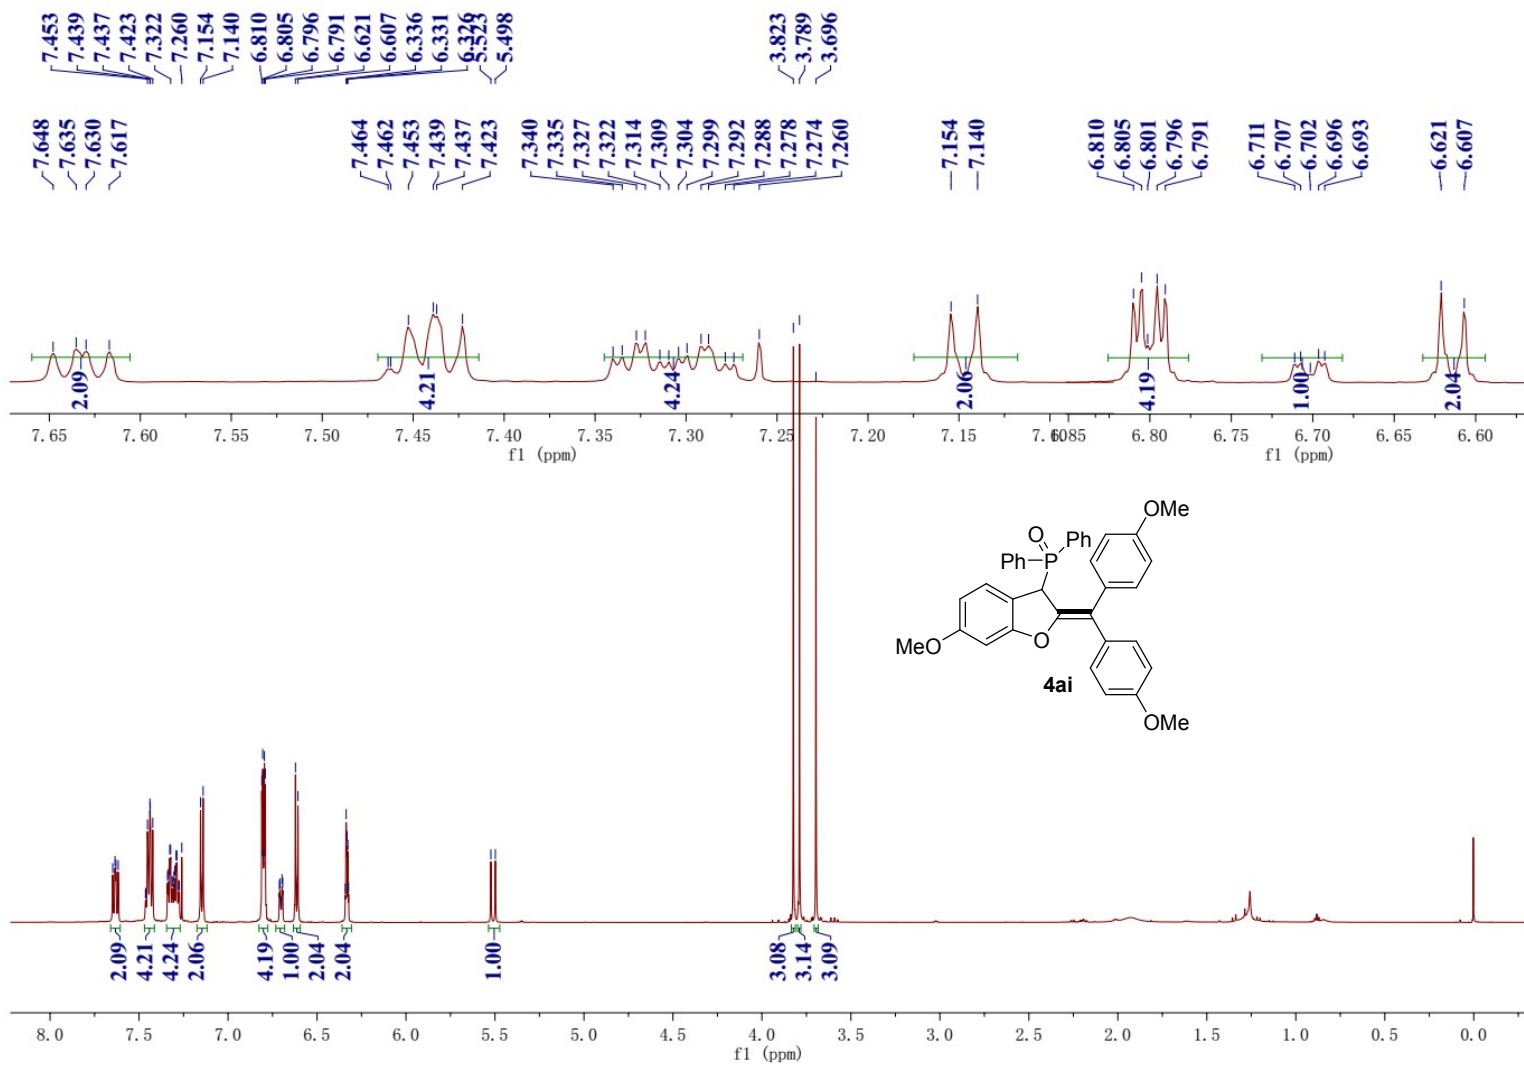

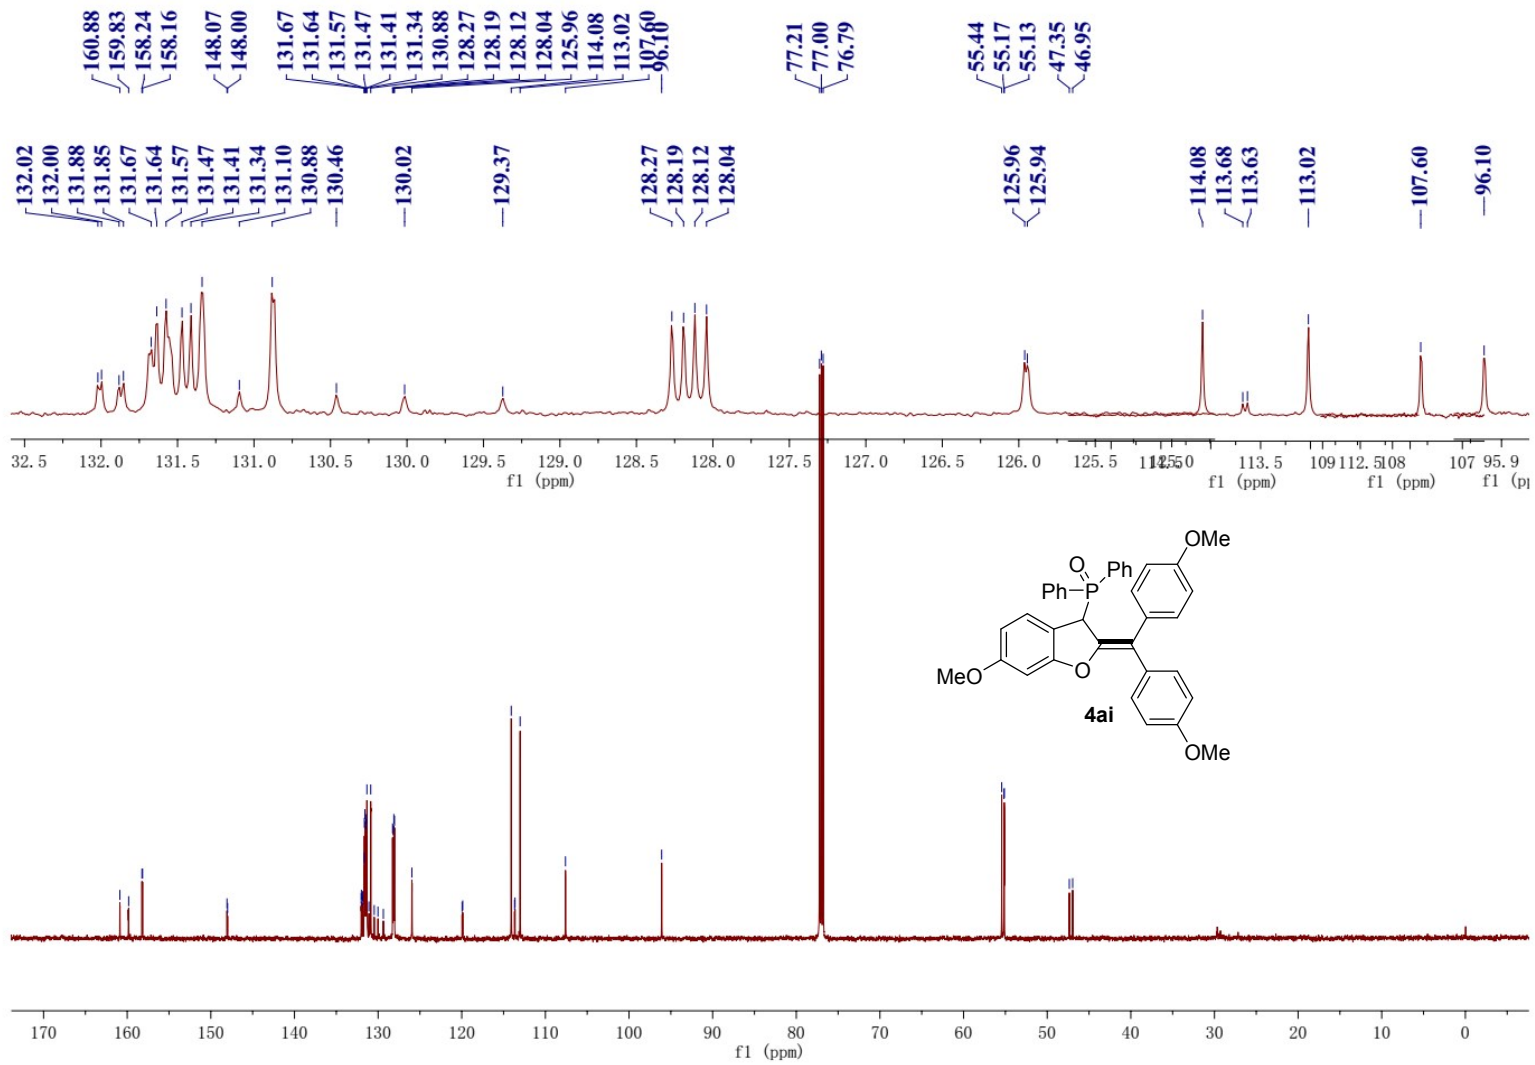

— 29.29

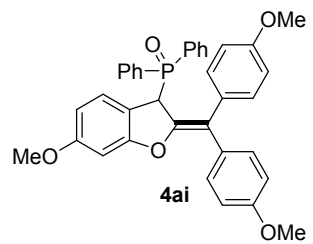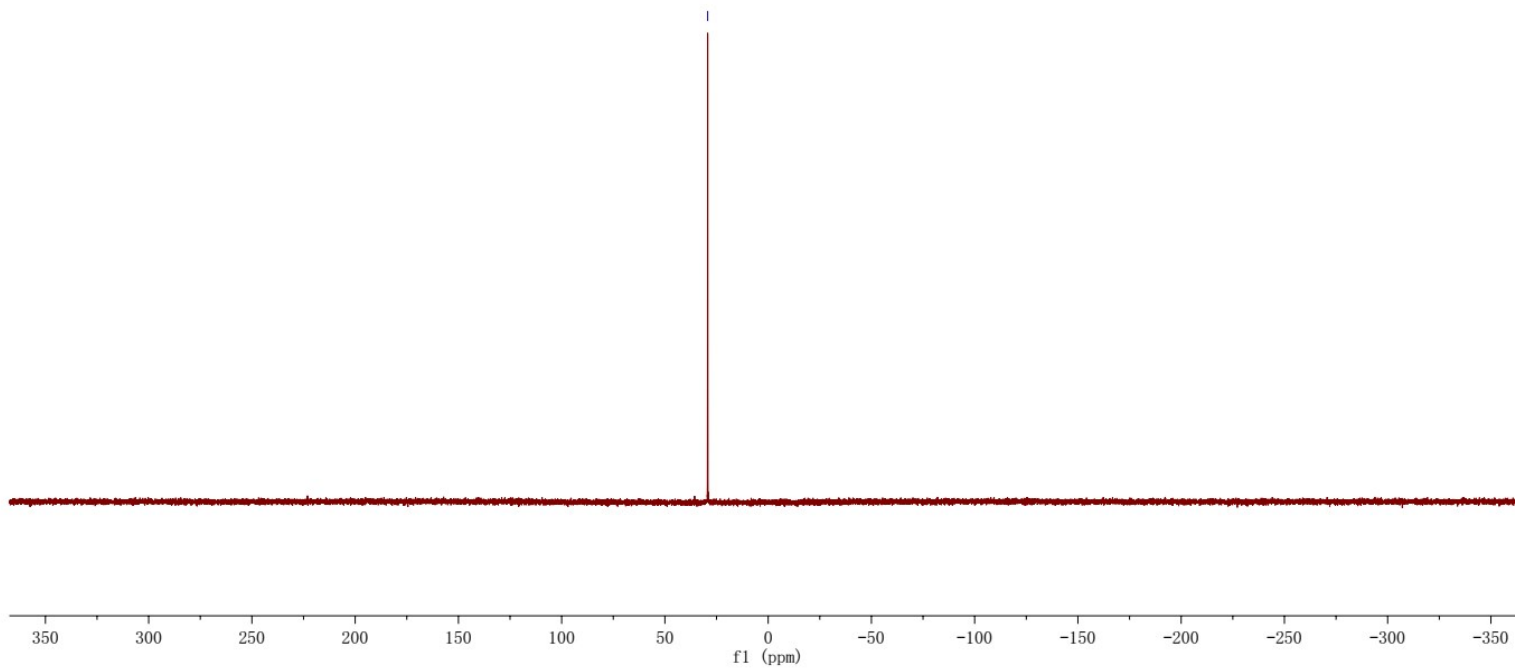



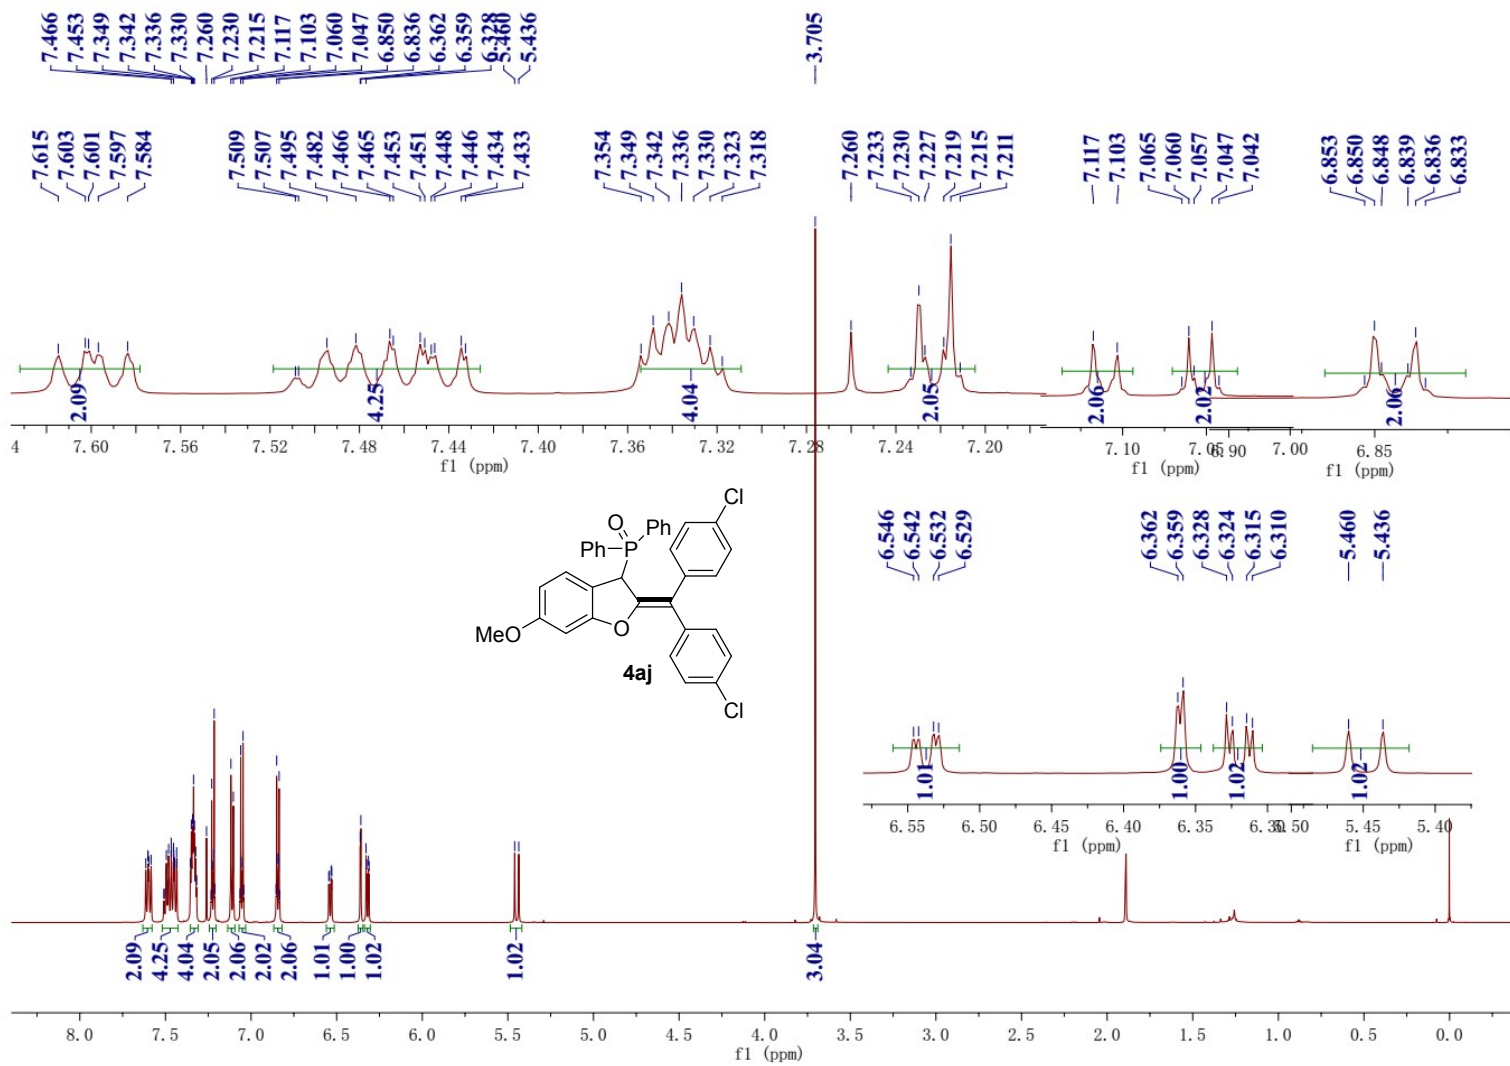

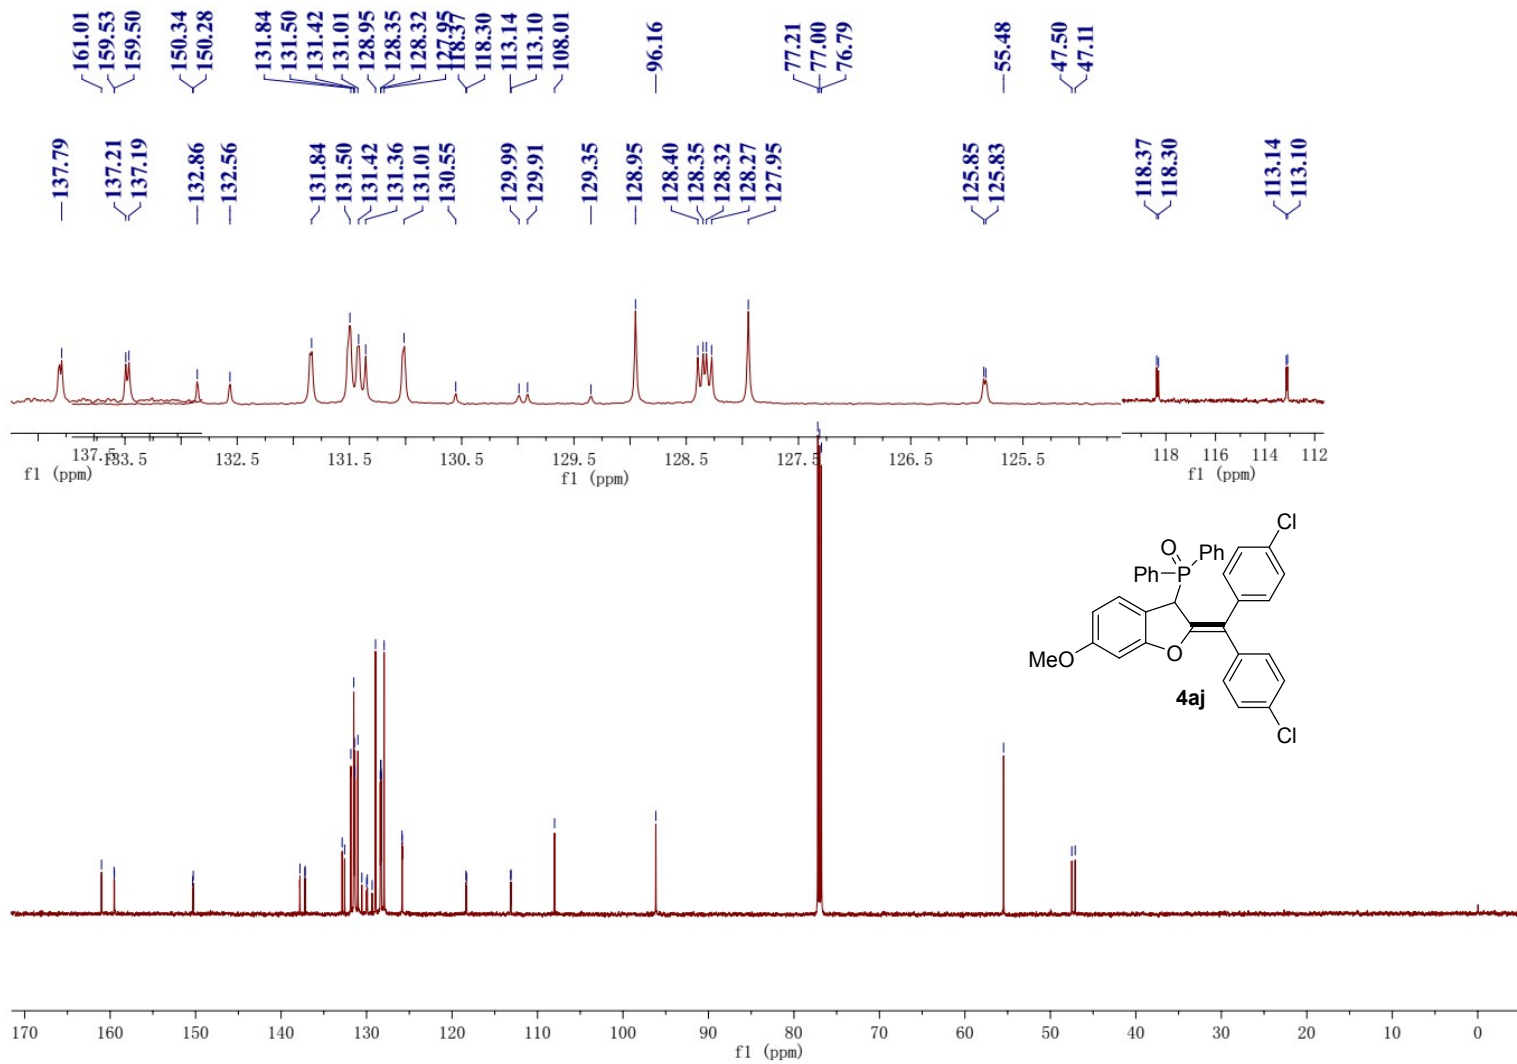

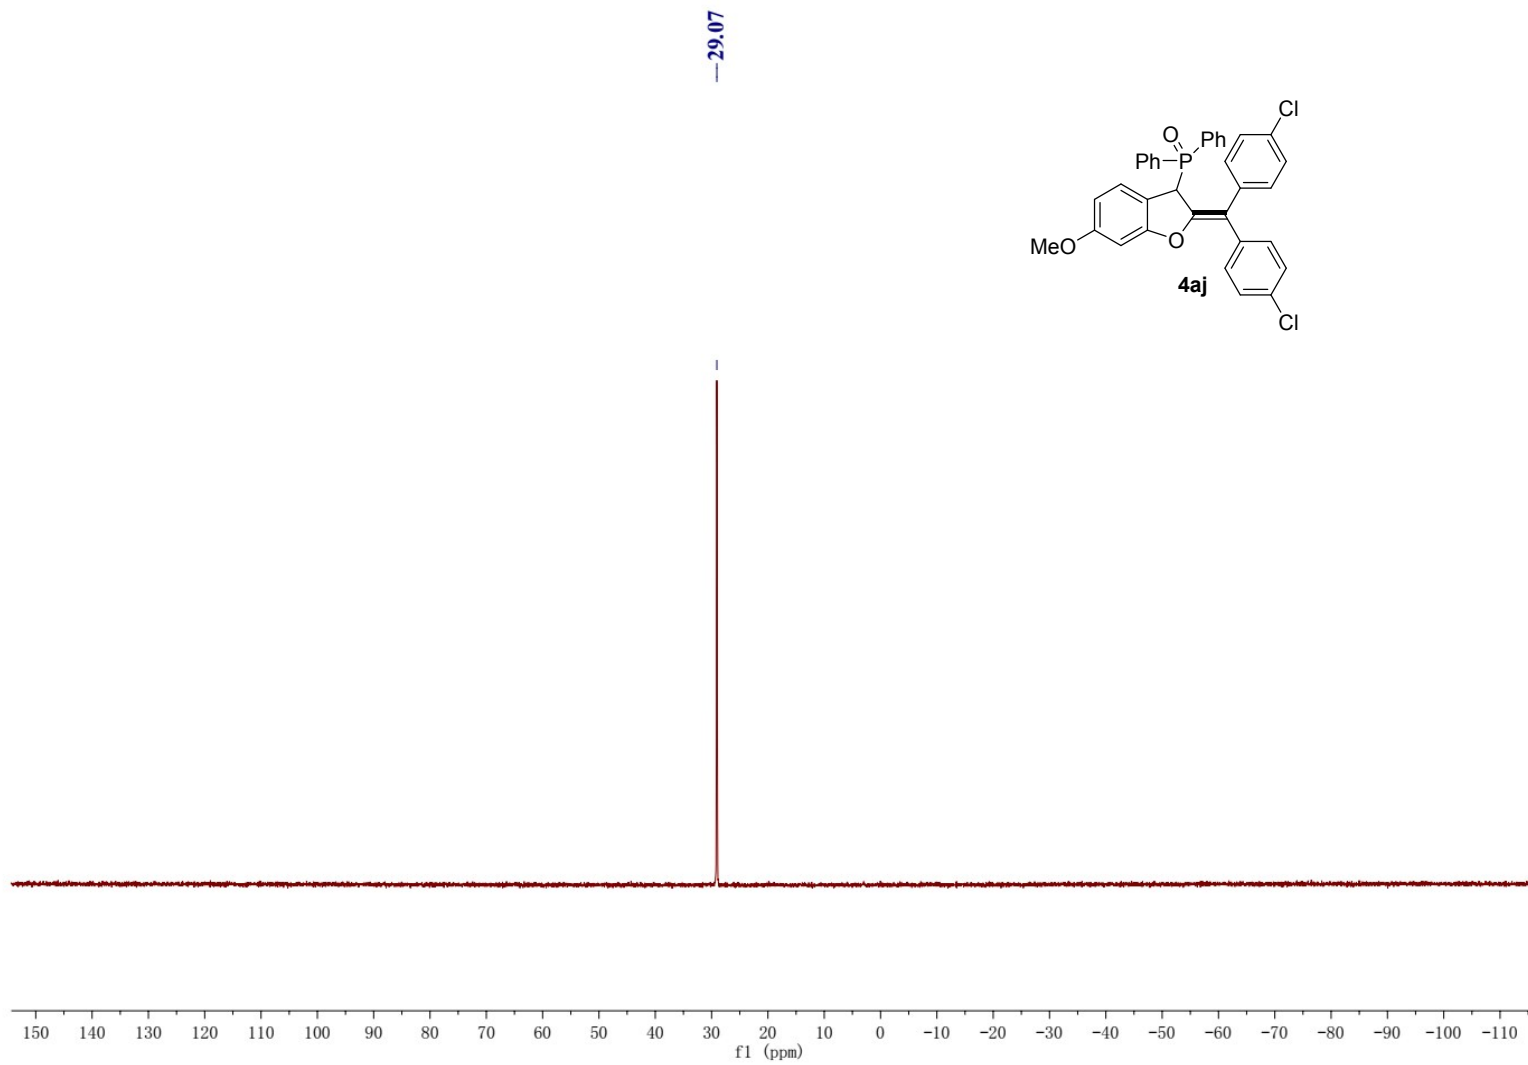

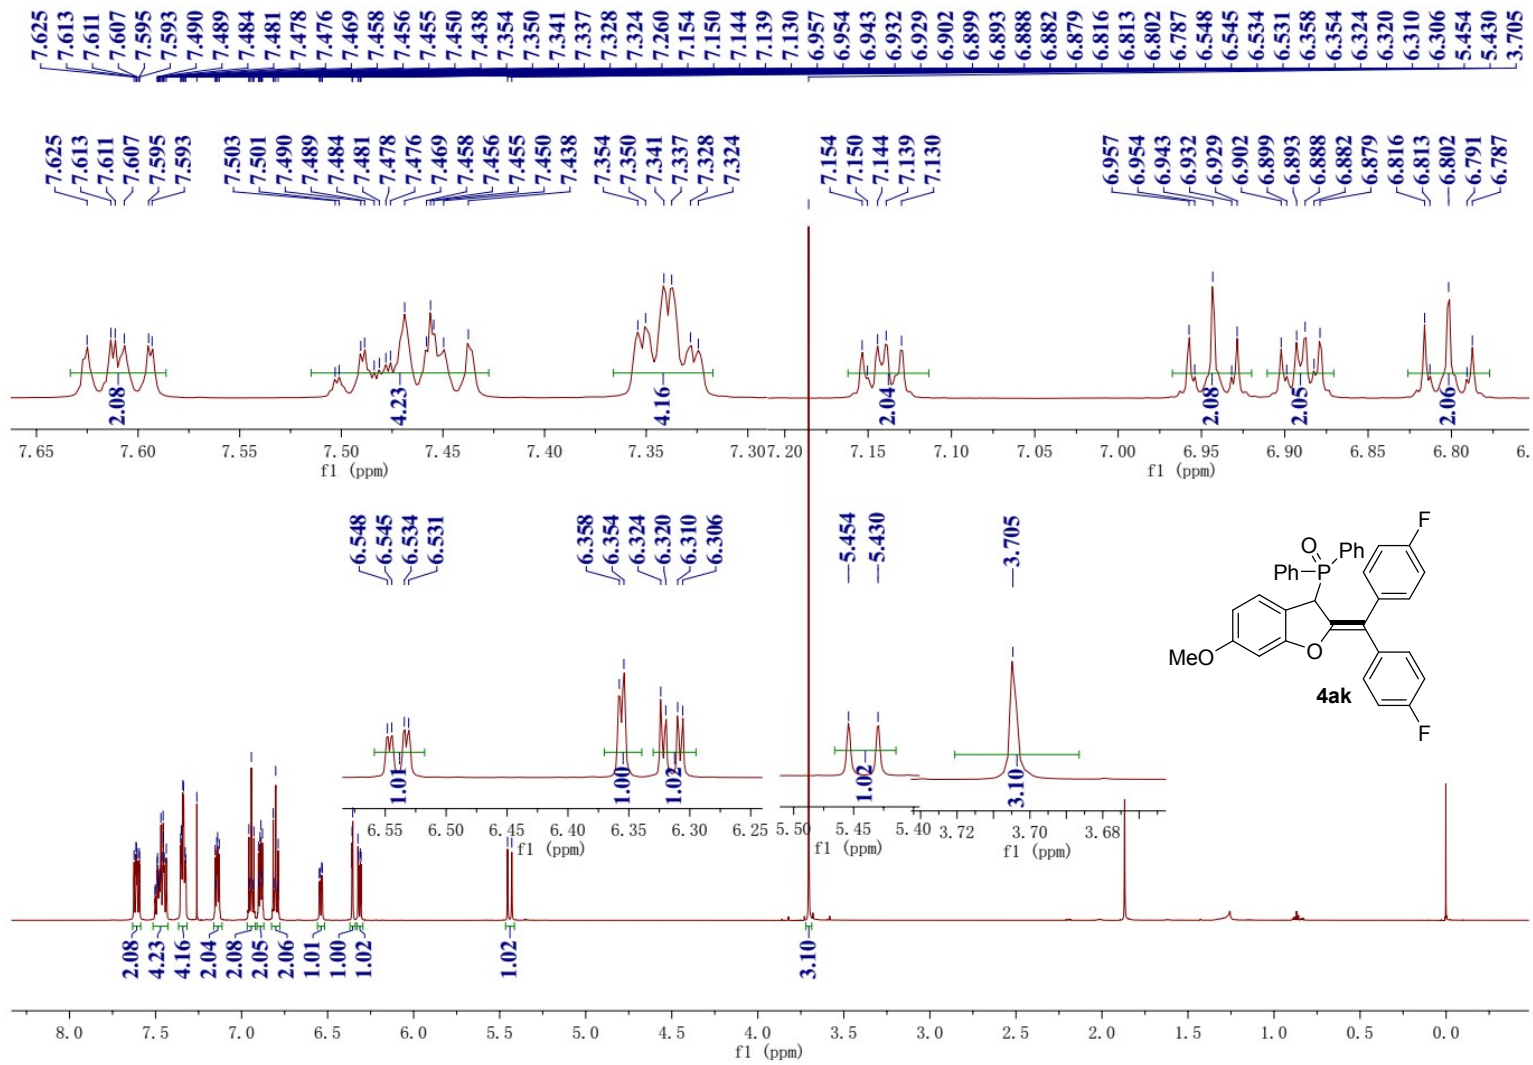

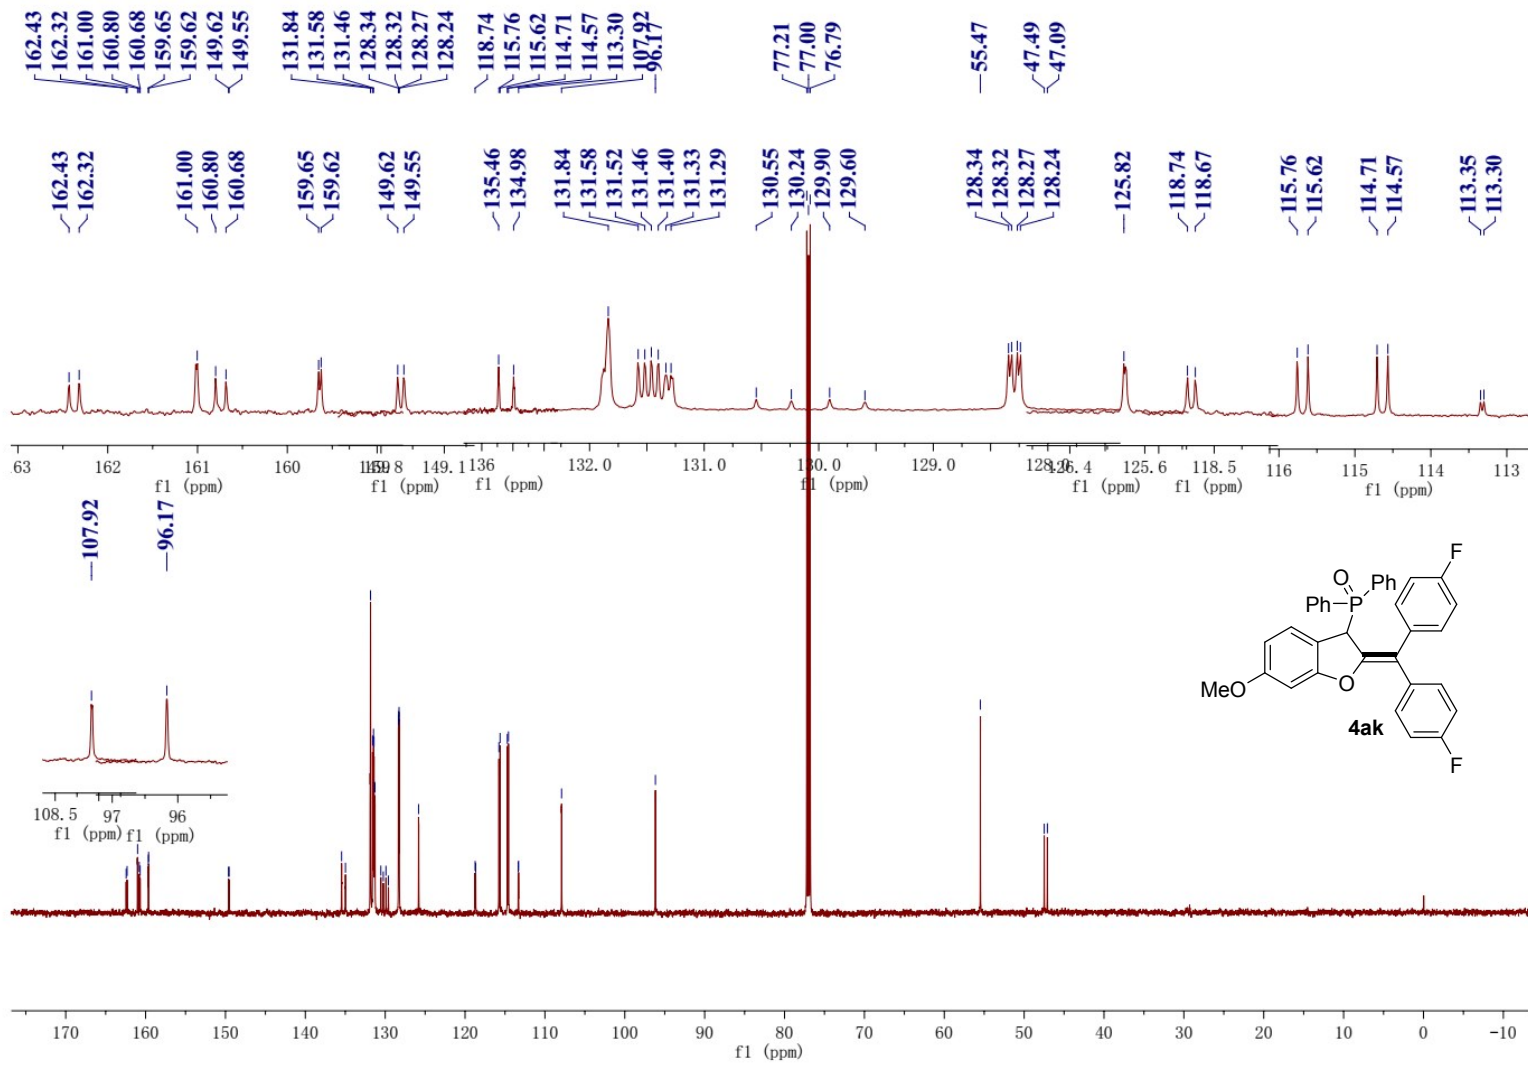

29.12

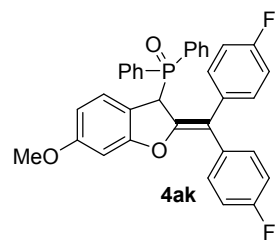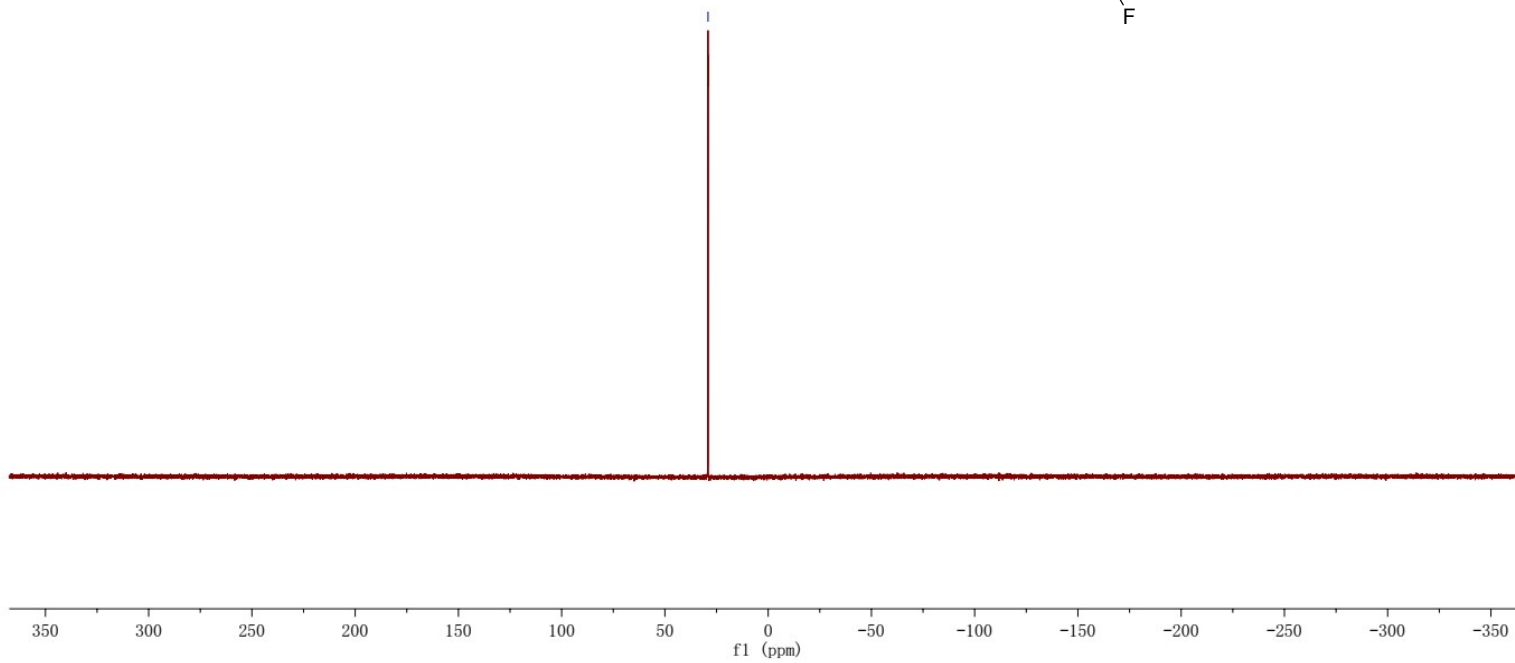

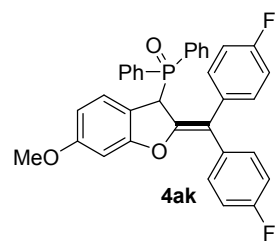

-114.75  
-114.85

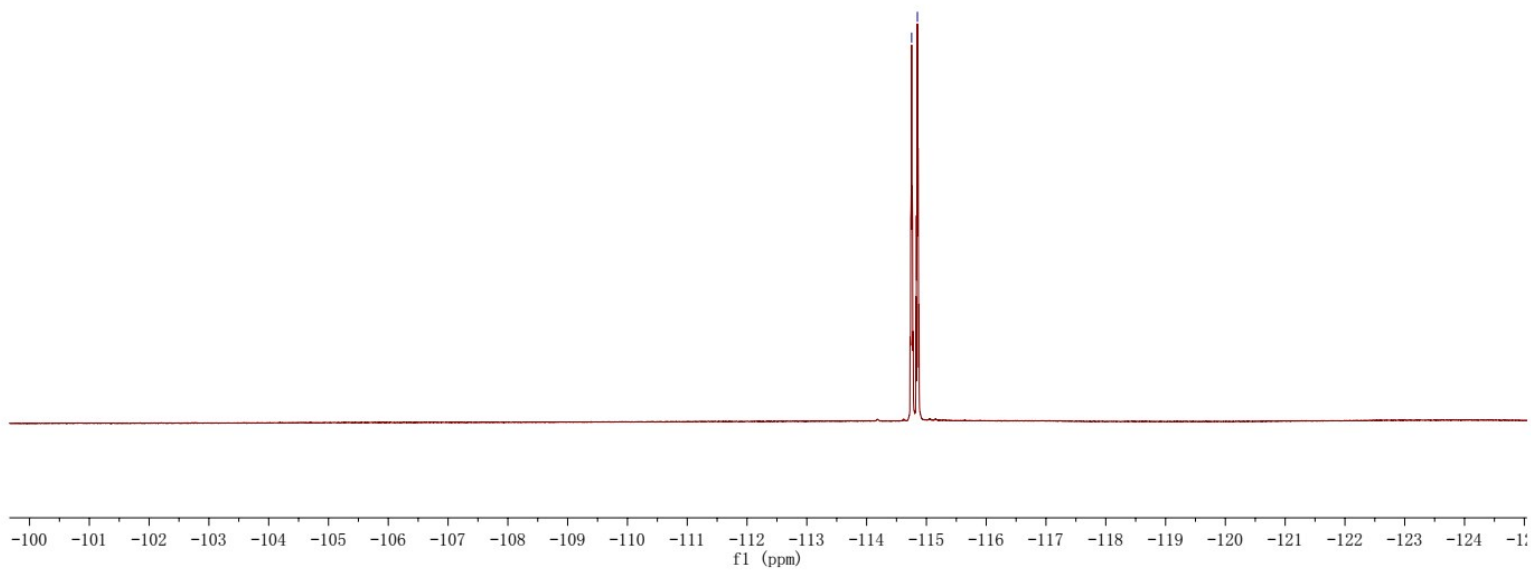

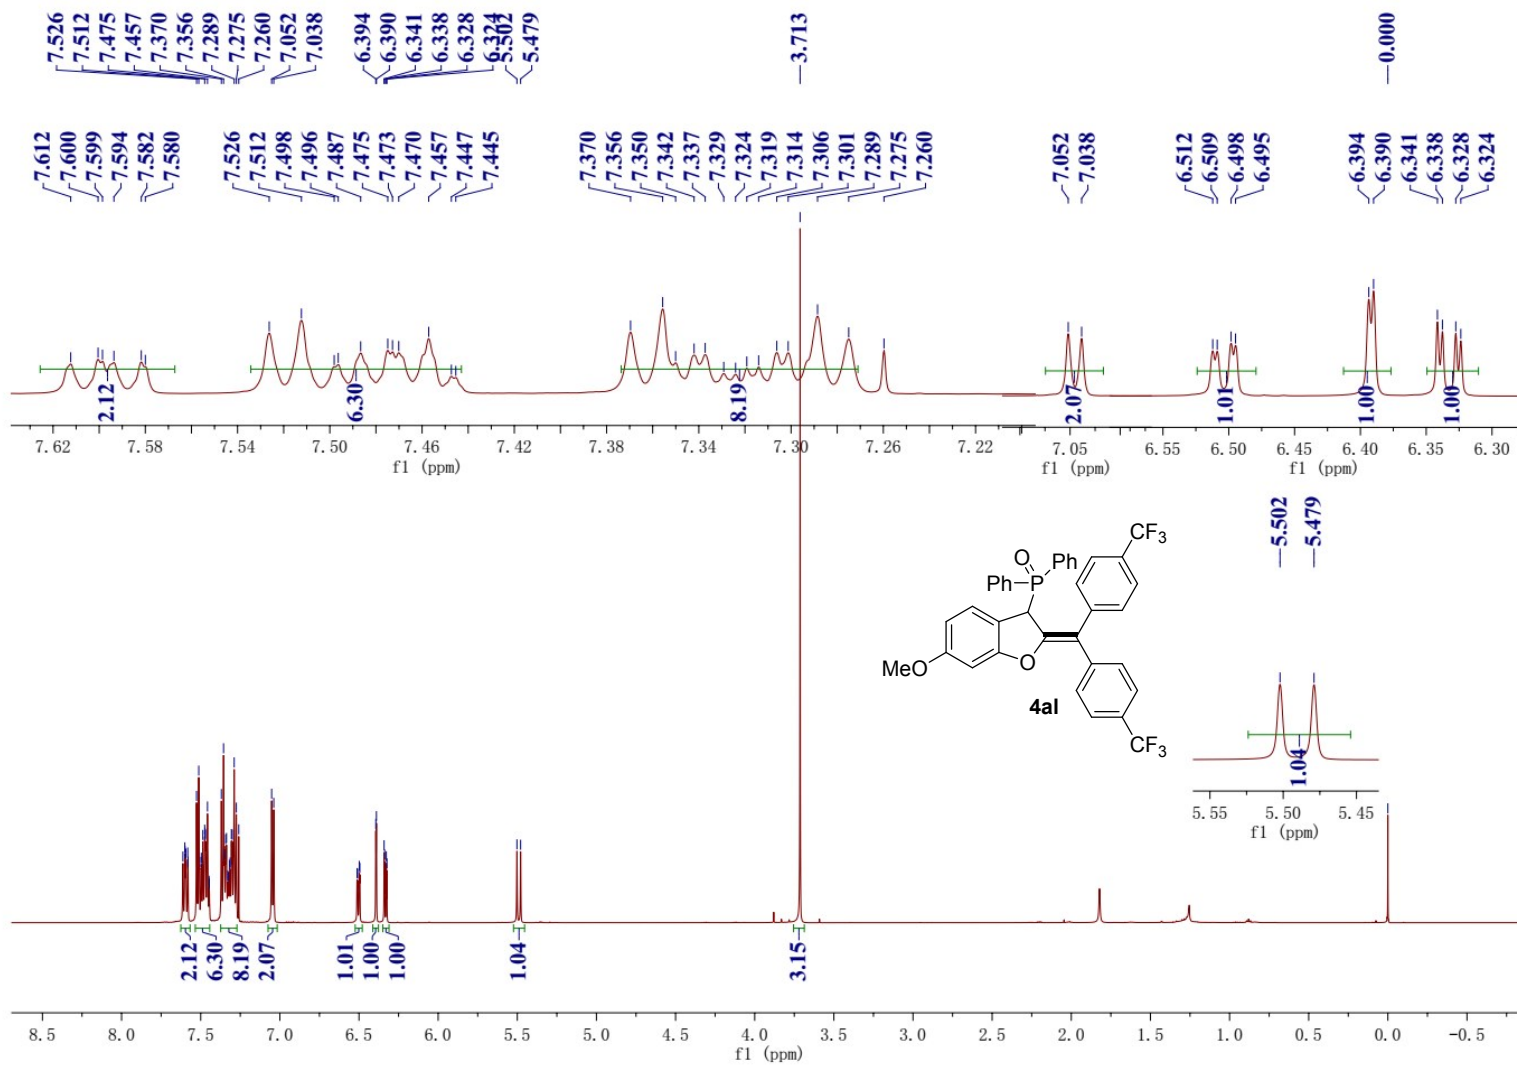



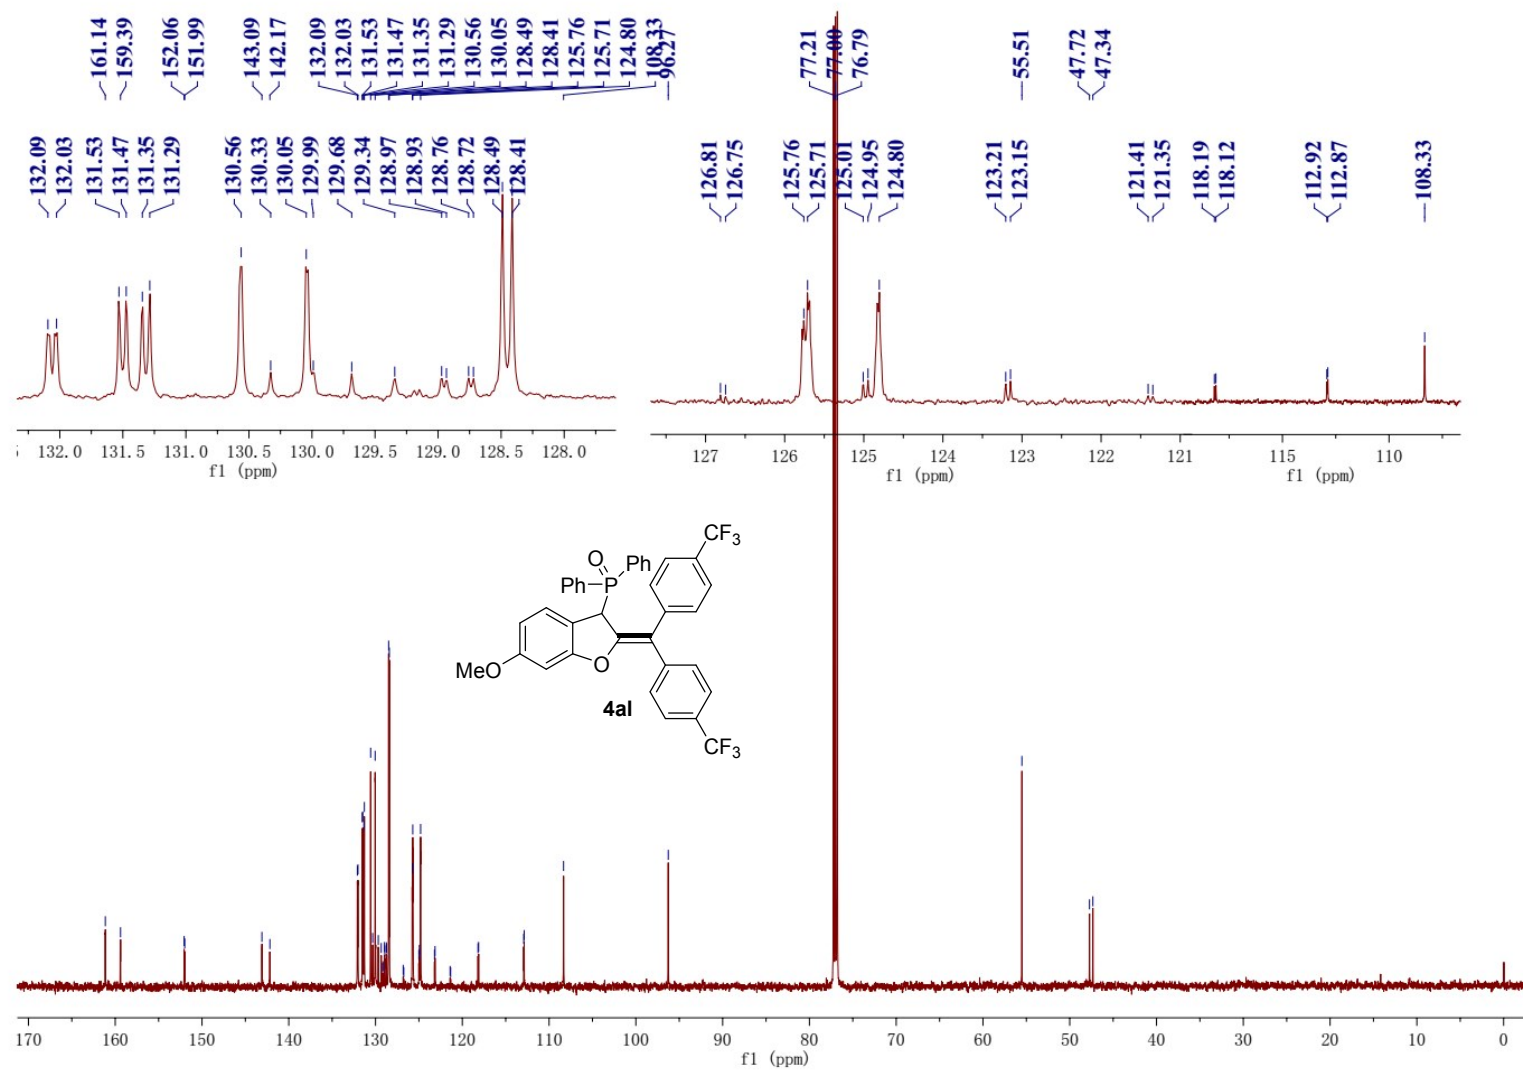

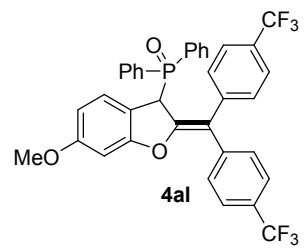

—28.92

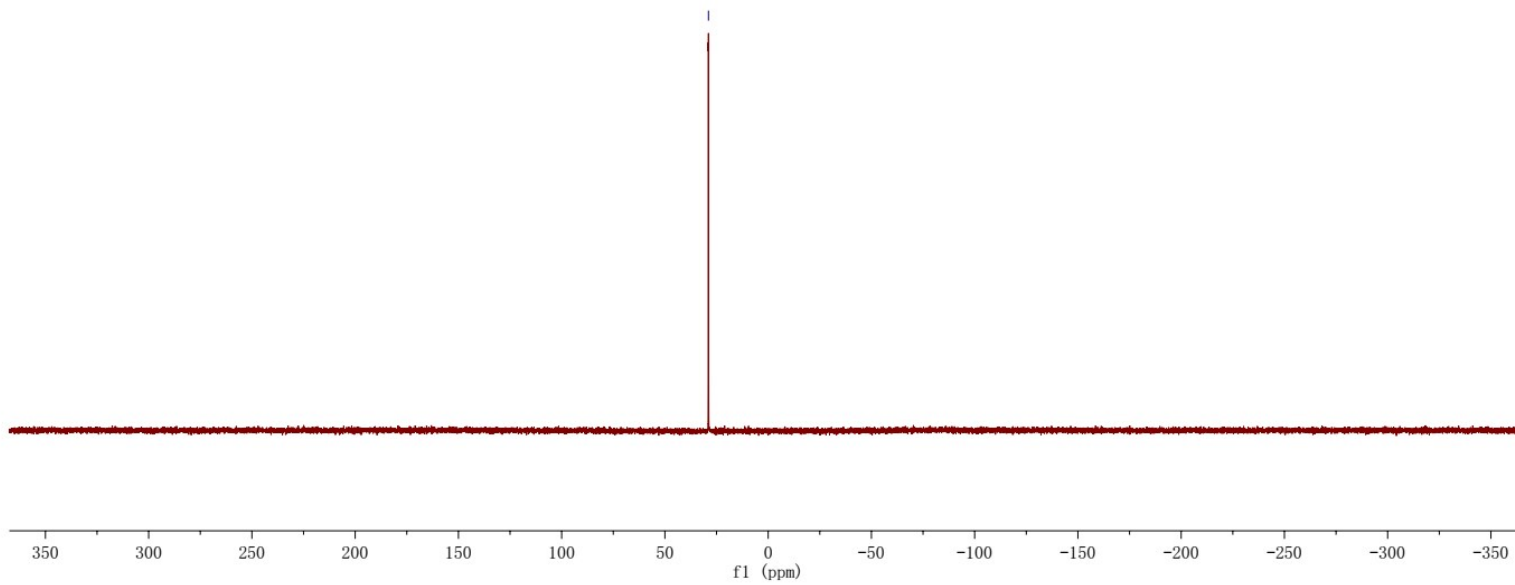

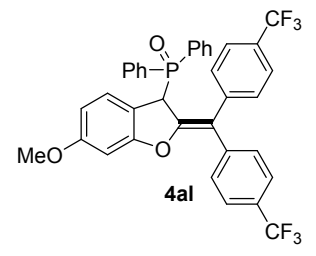

-62.41  
-62.42

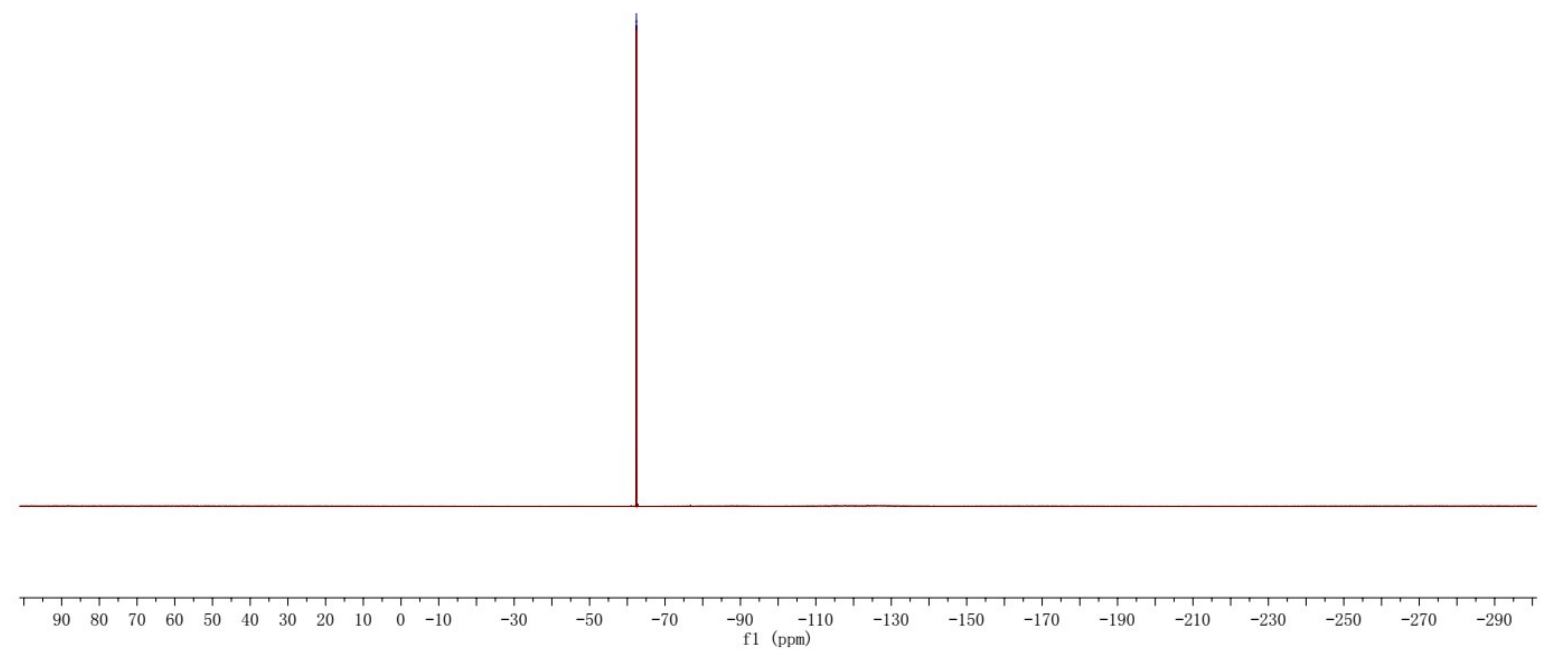

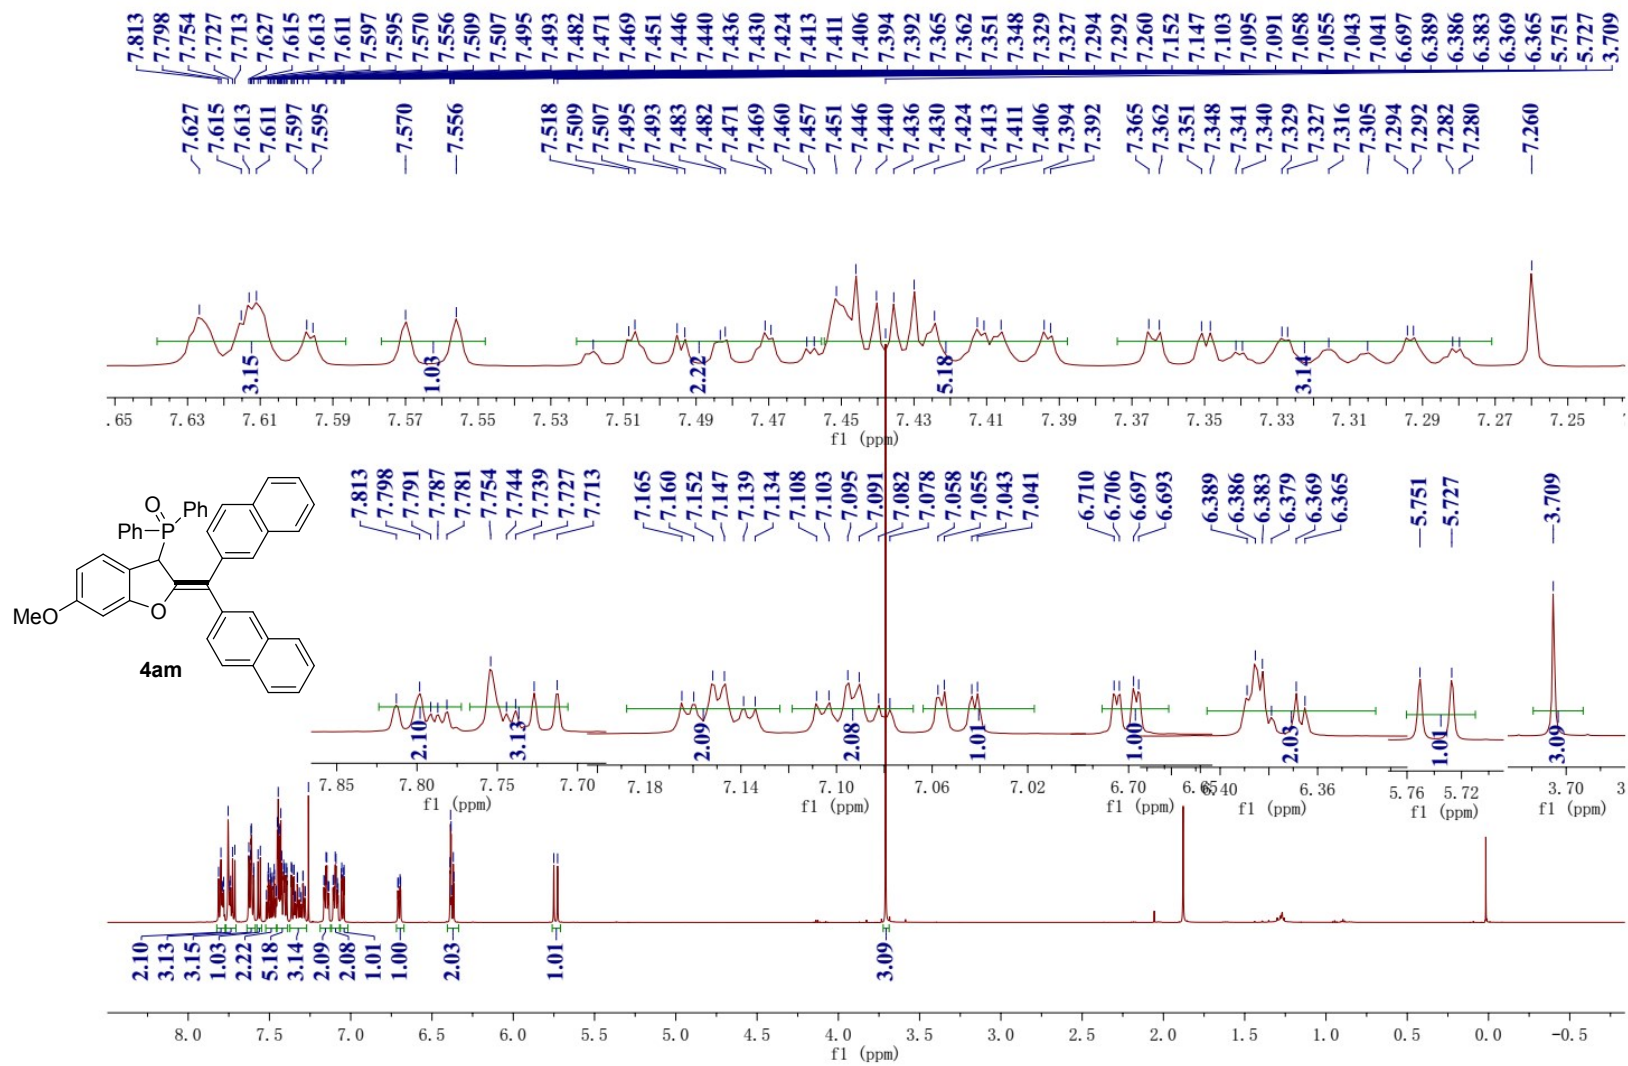



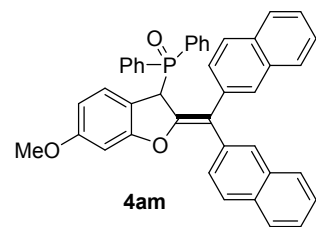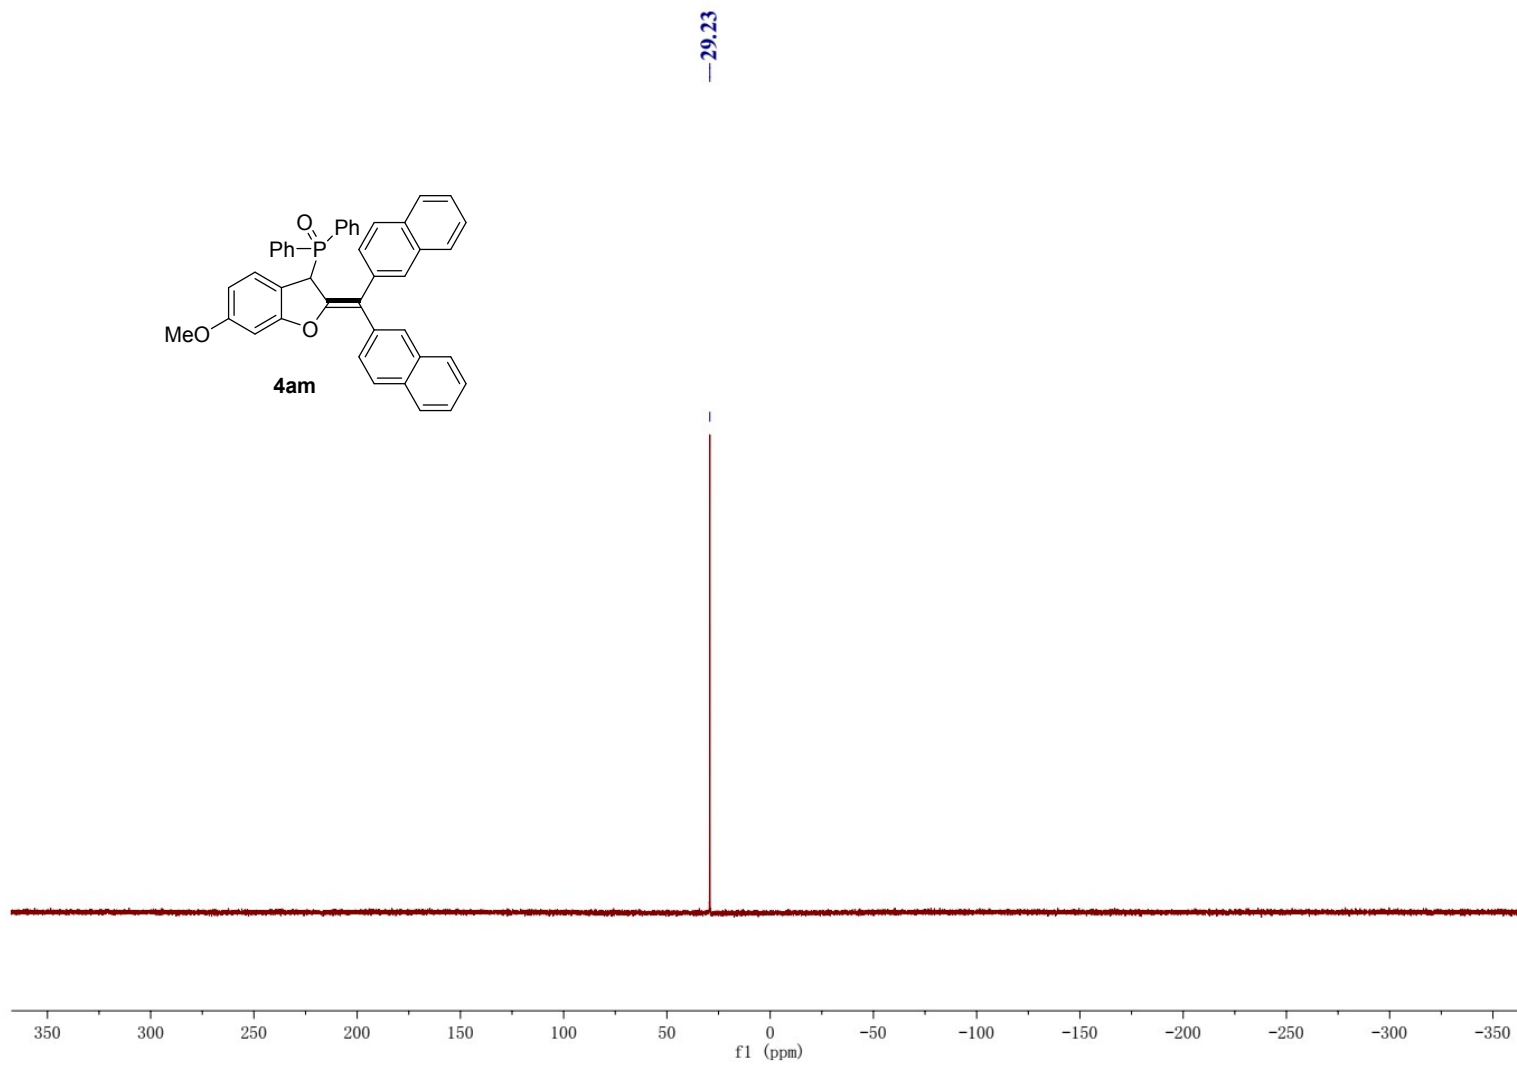

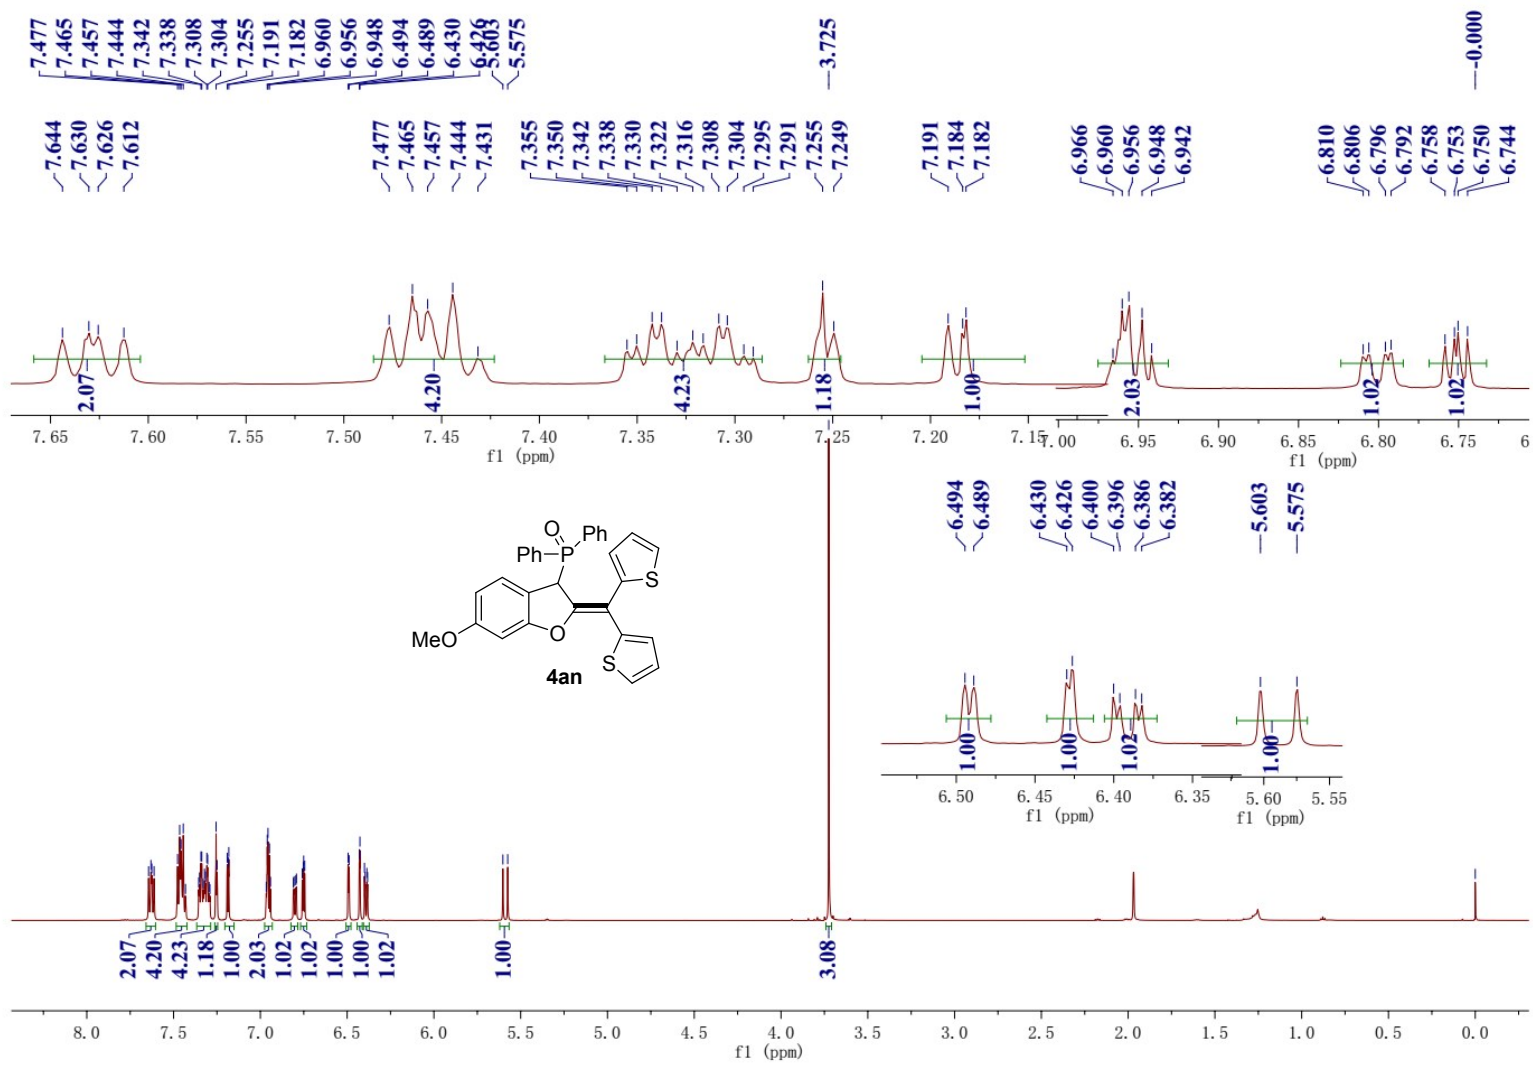

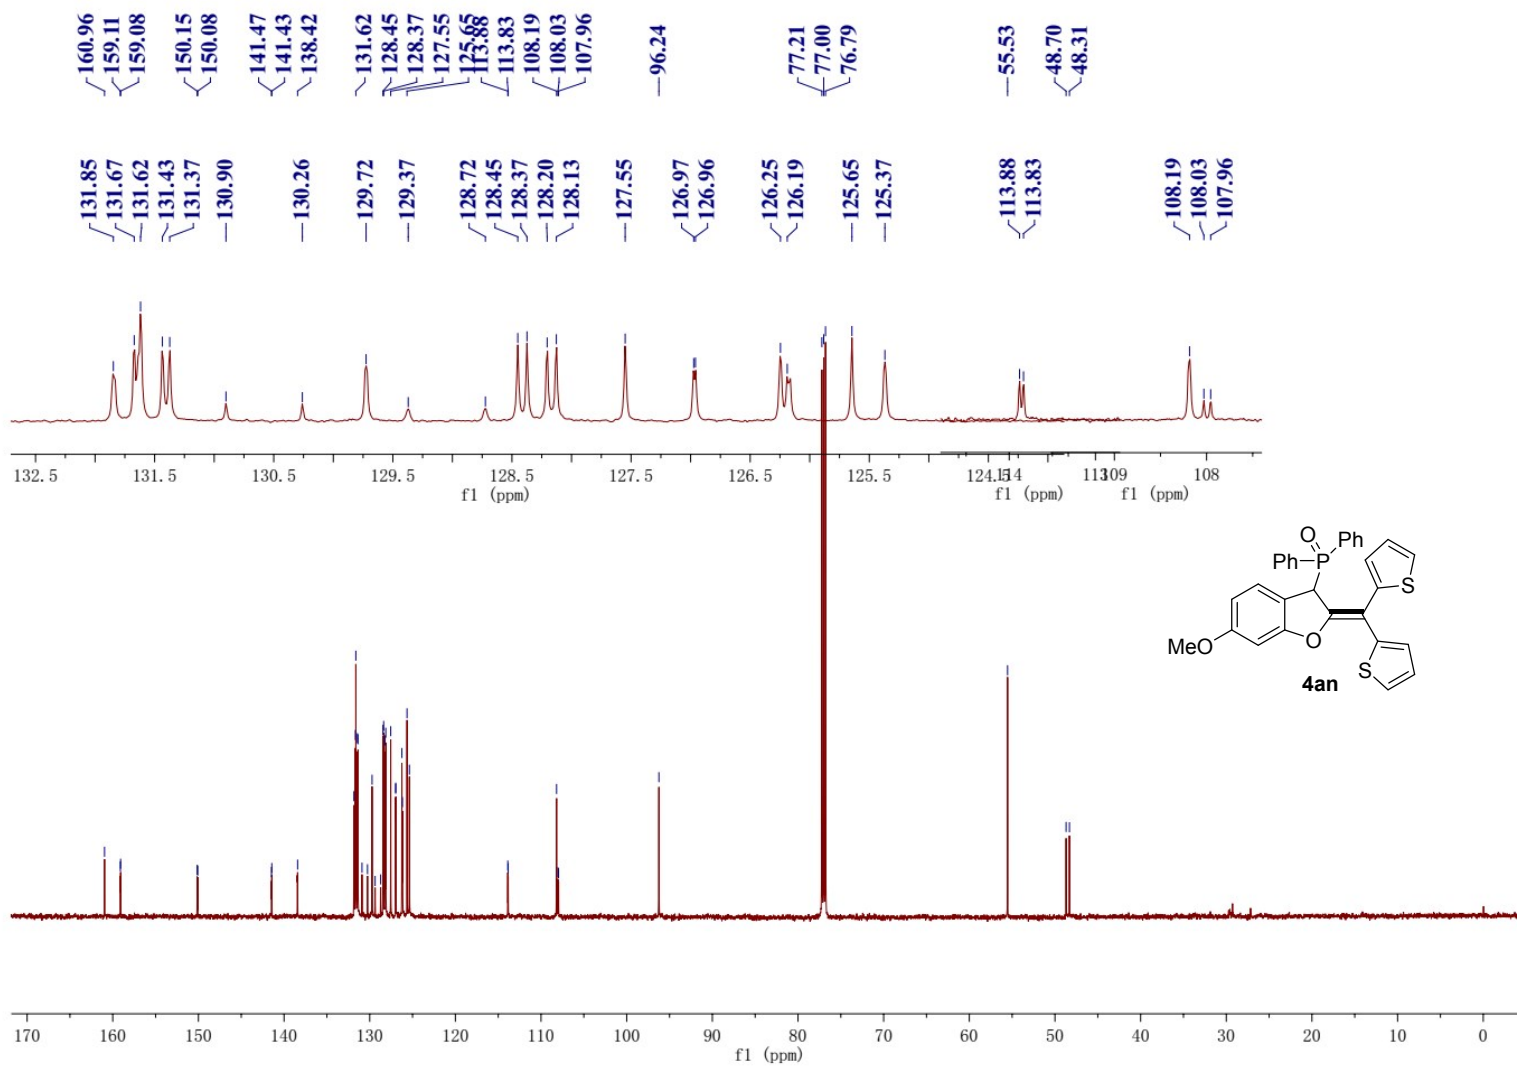



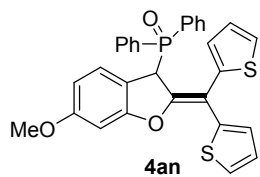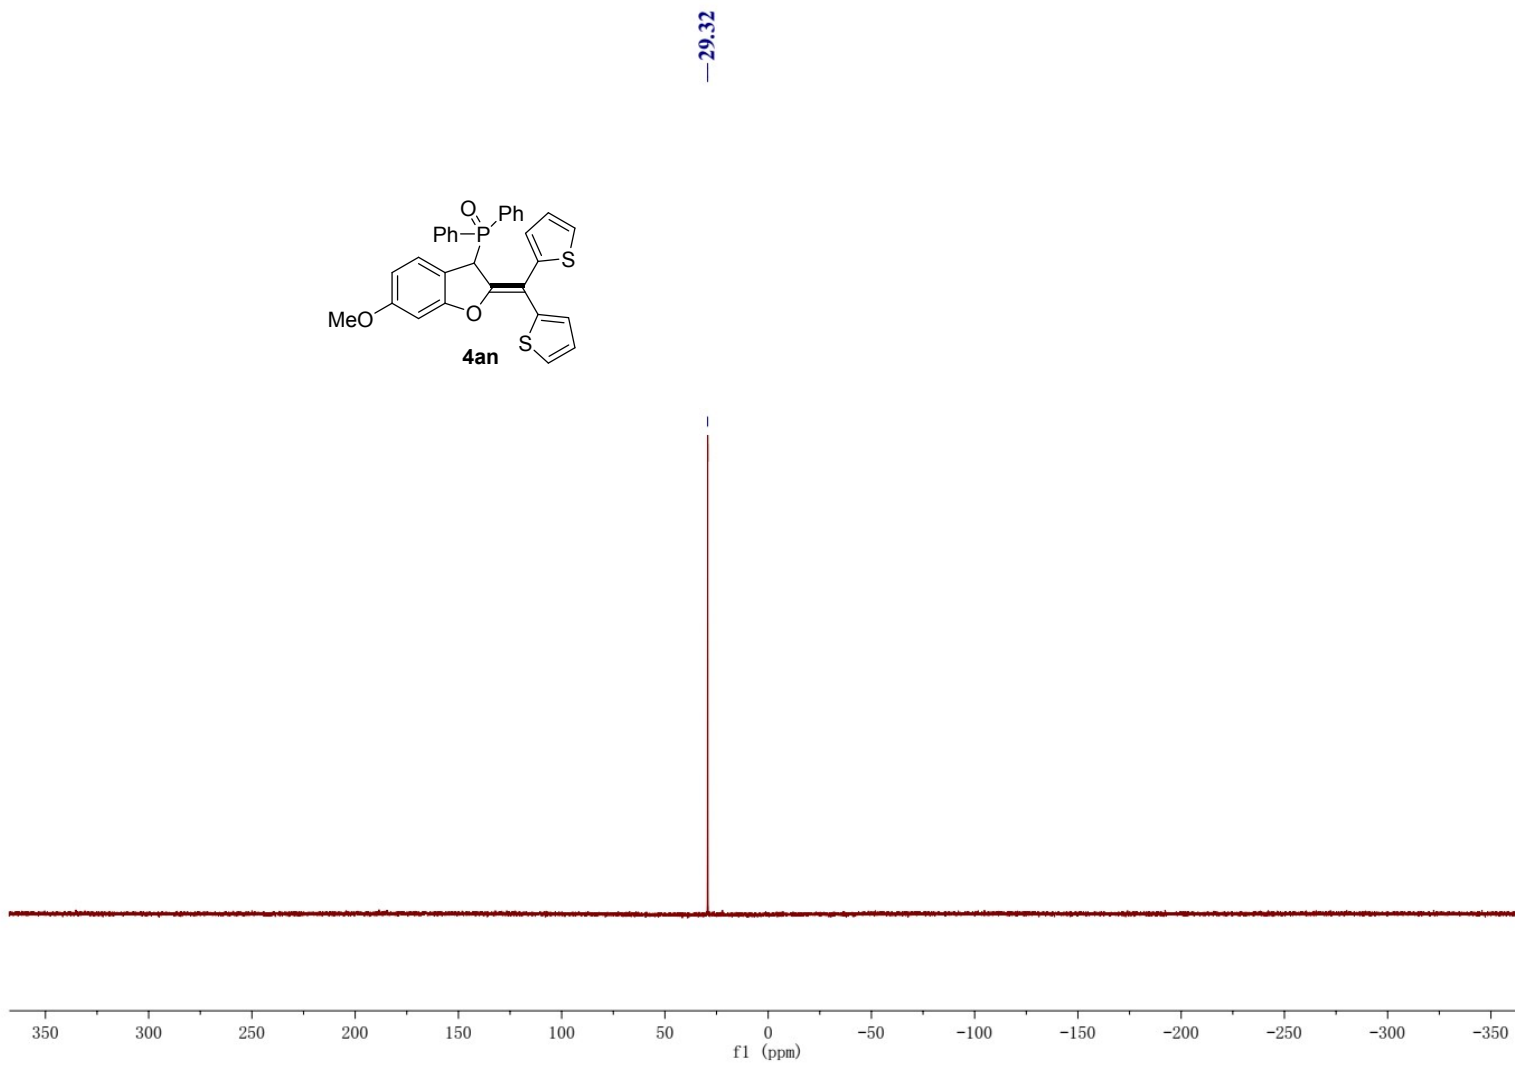

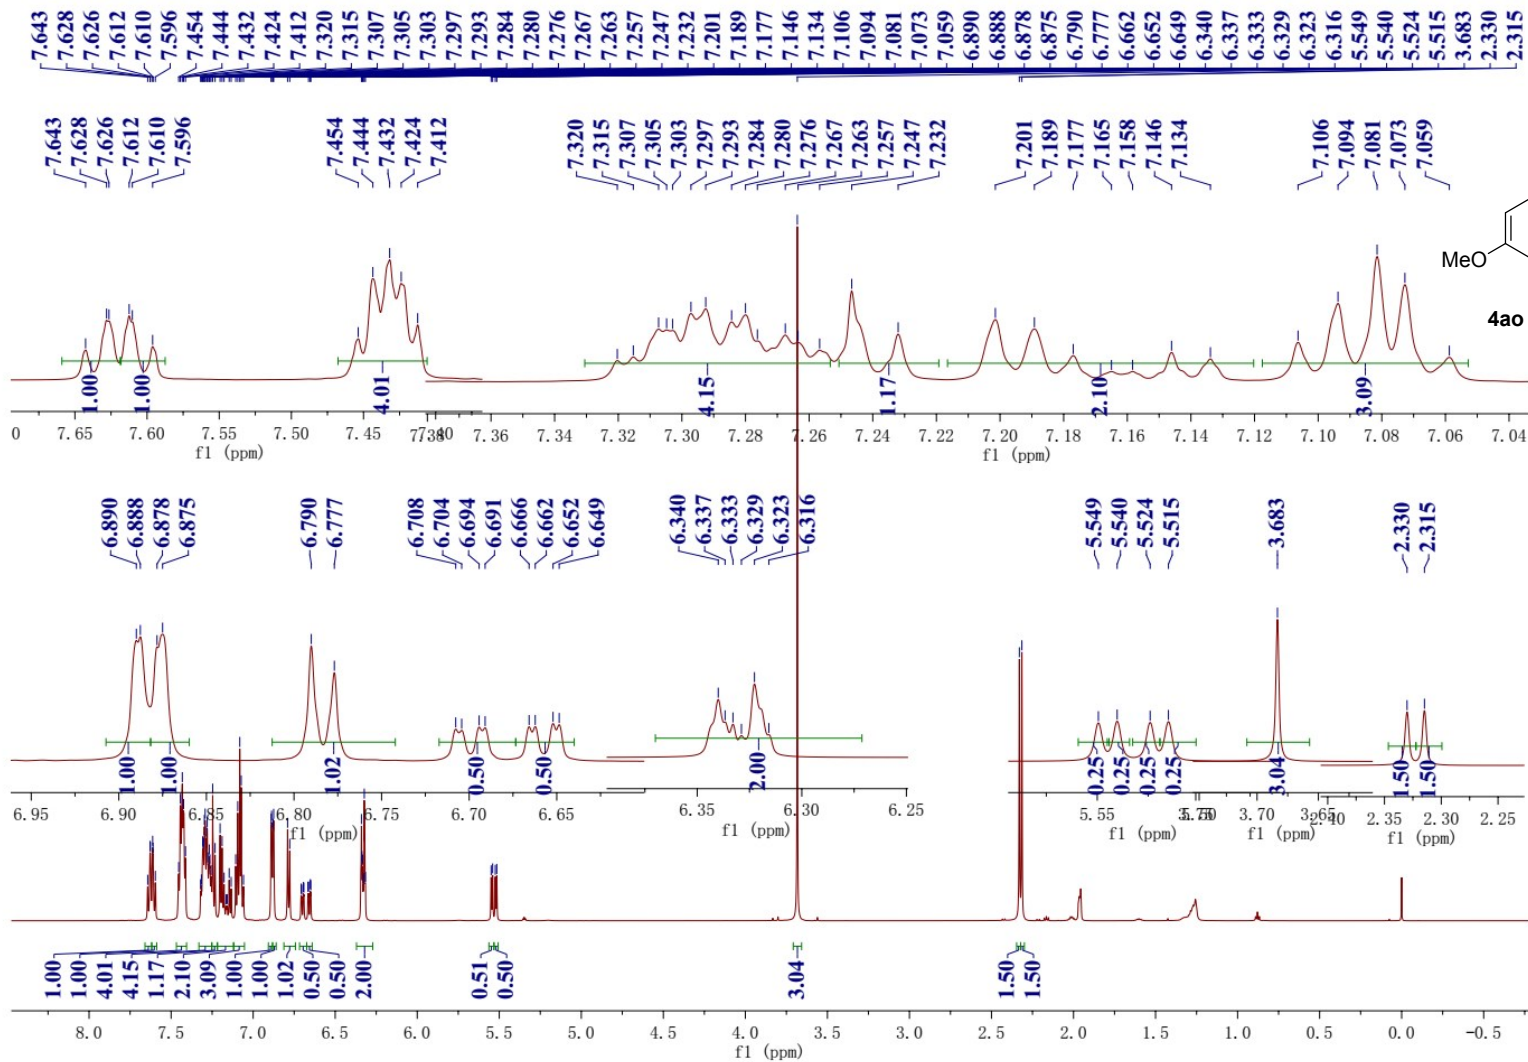

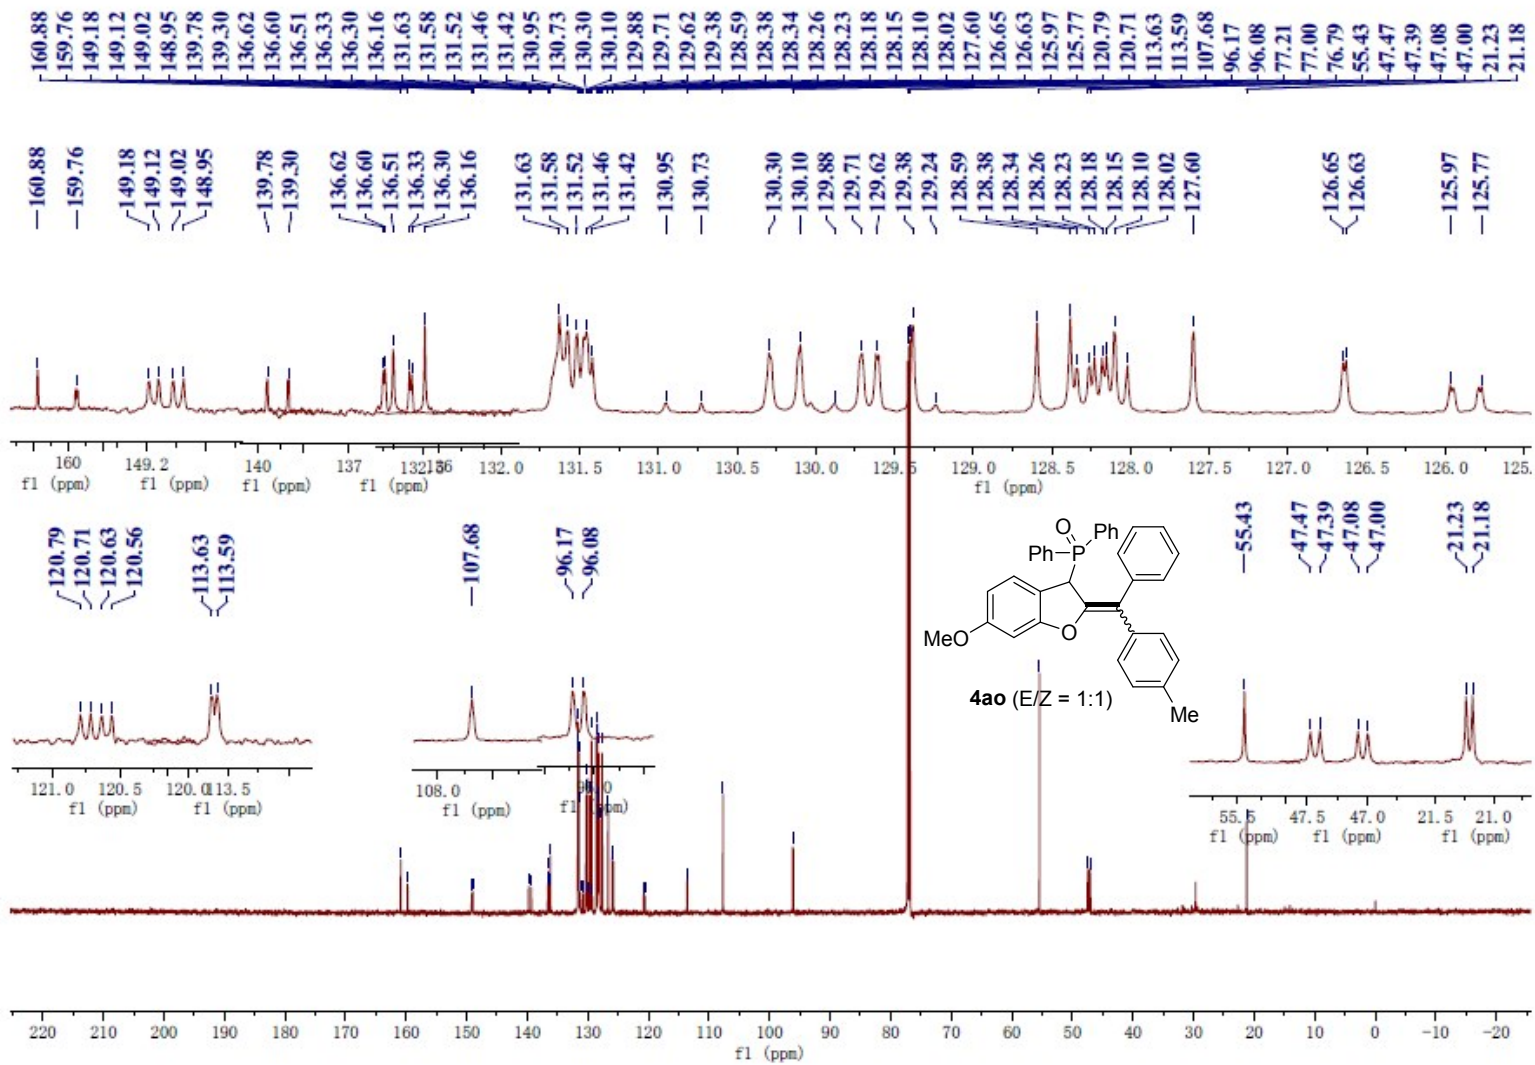

—28.76

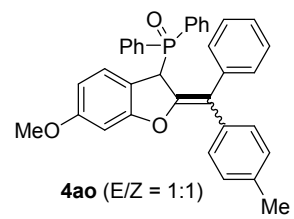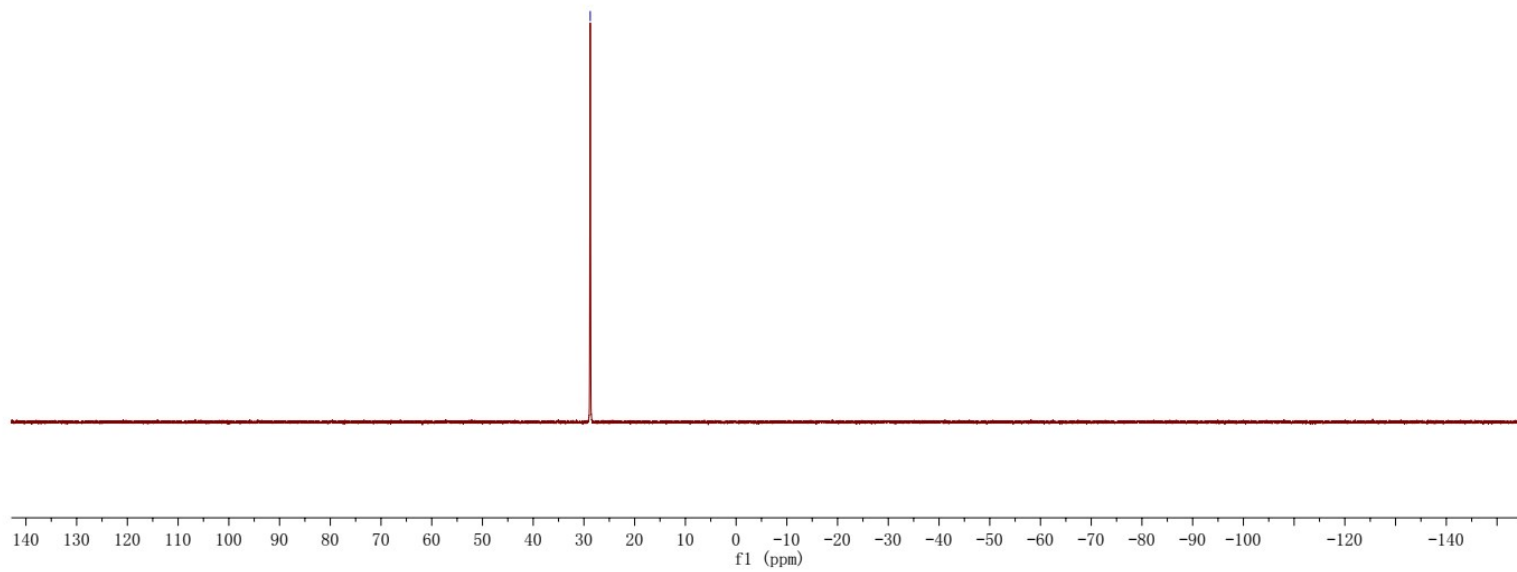

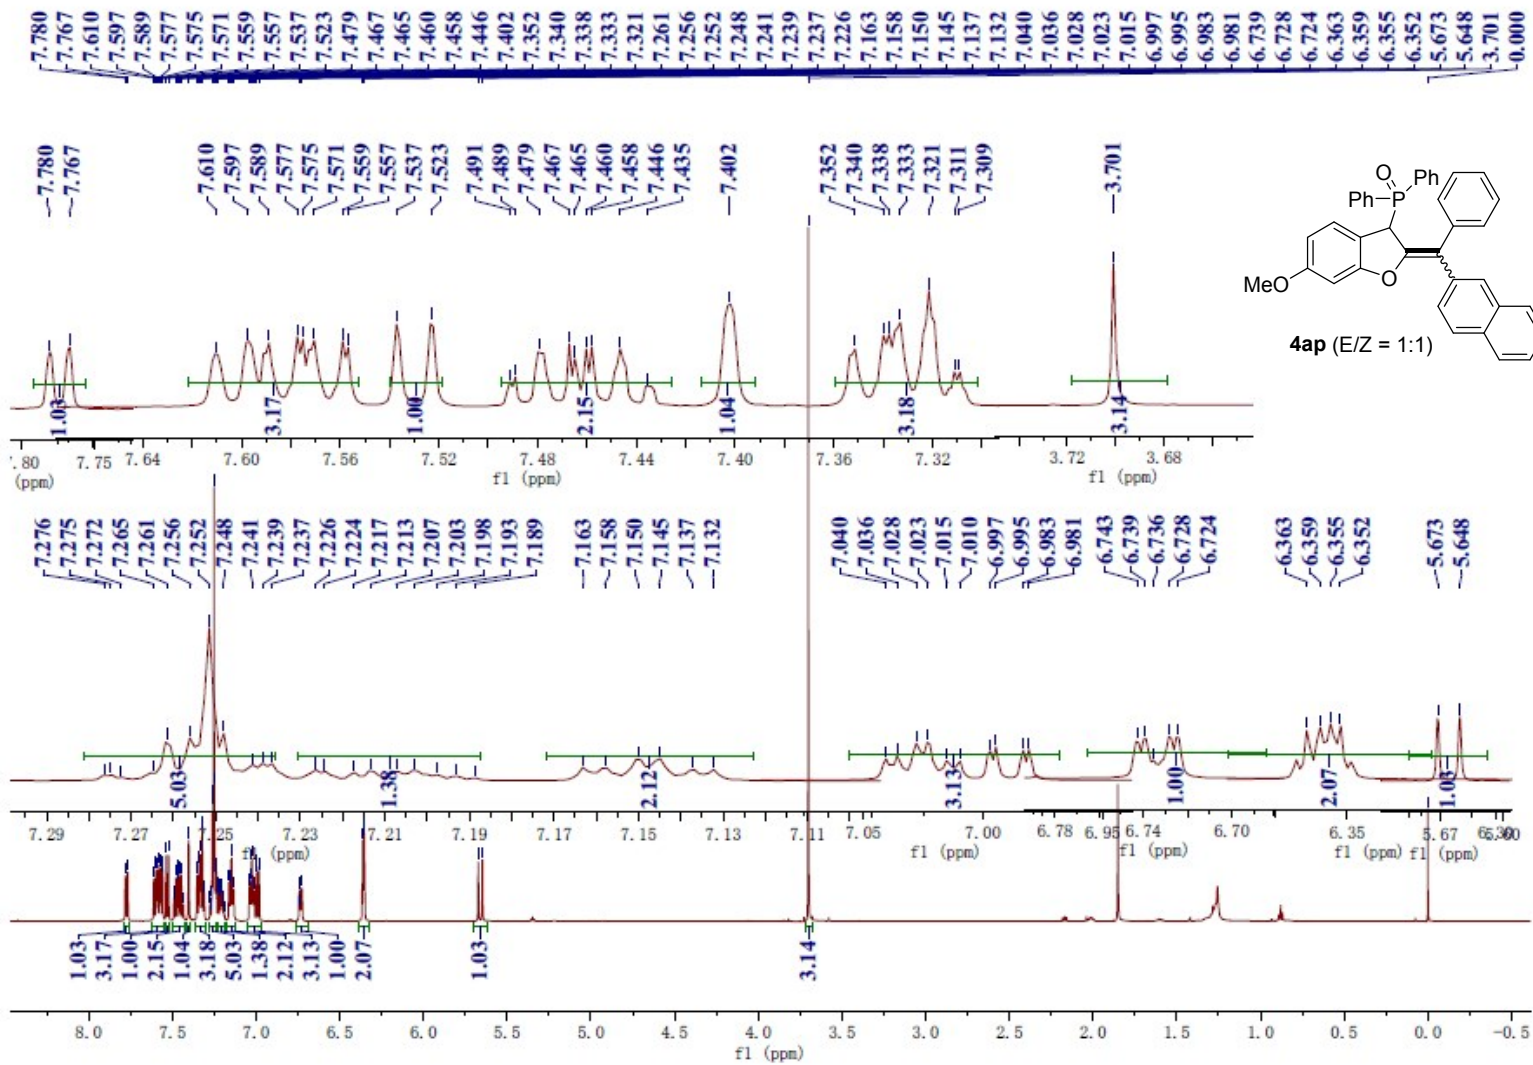

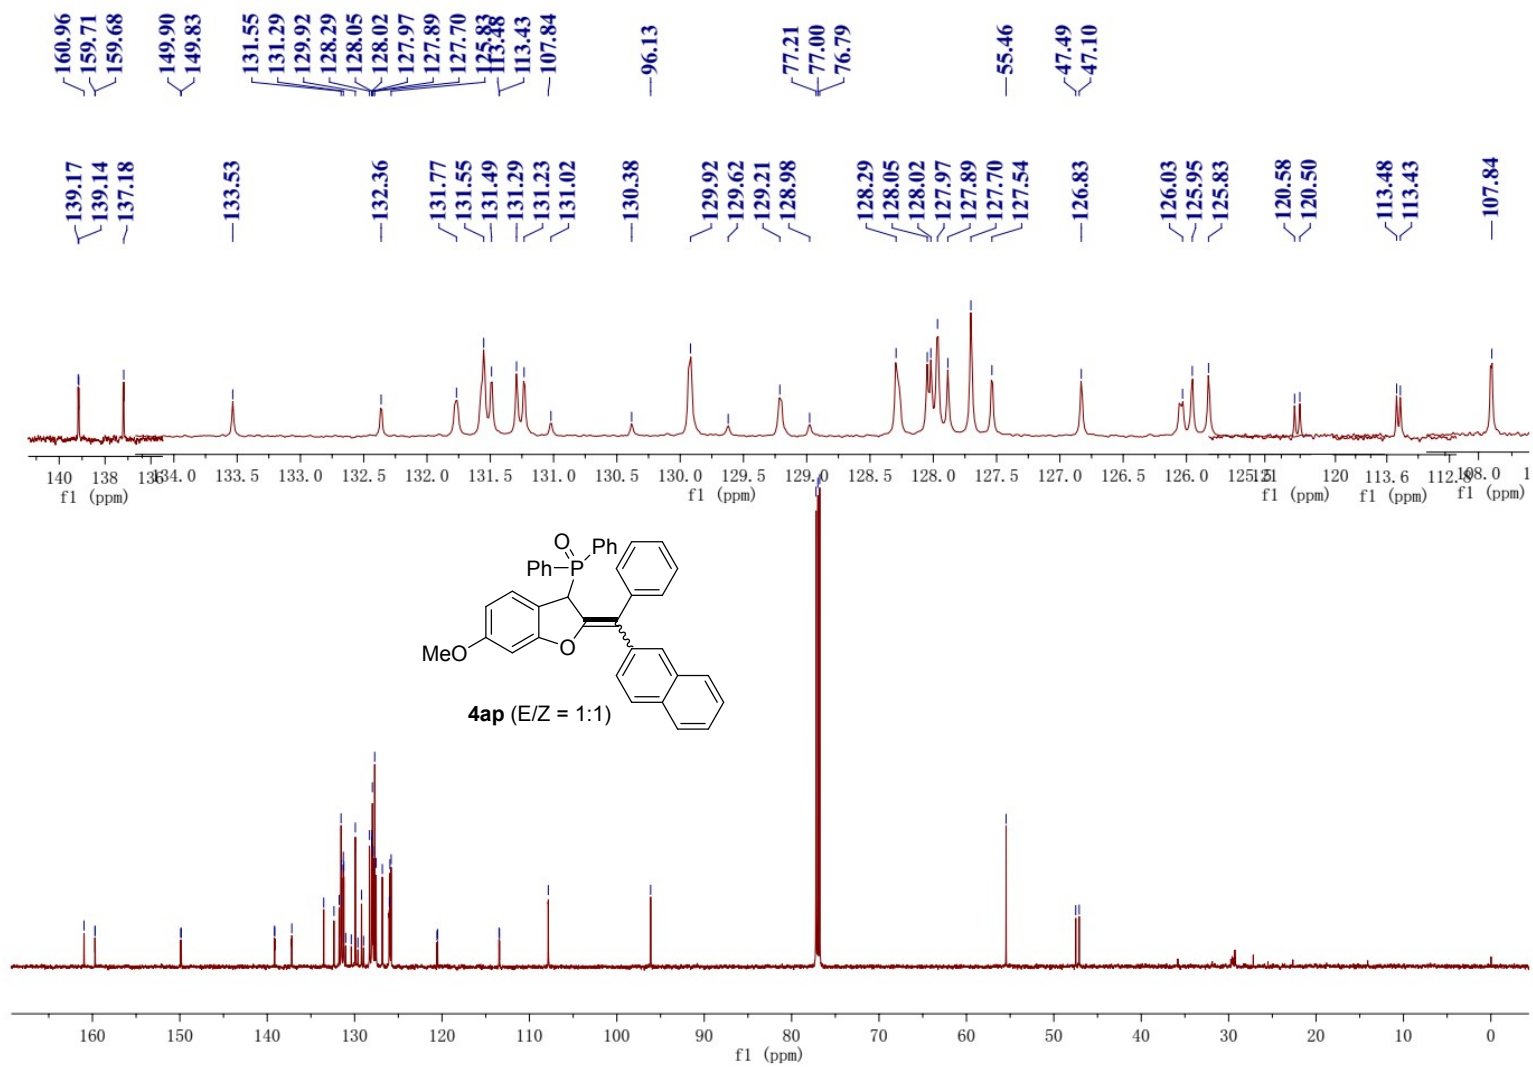

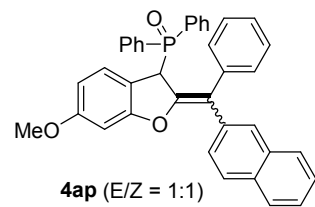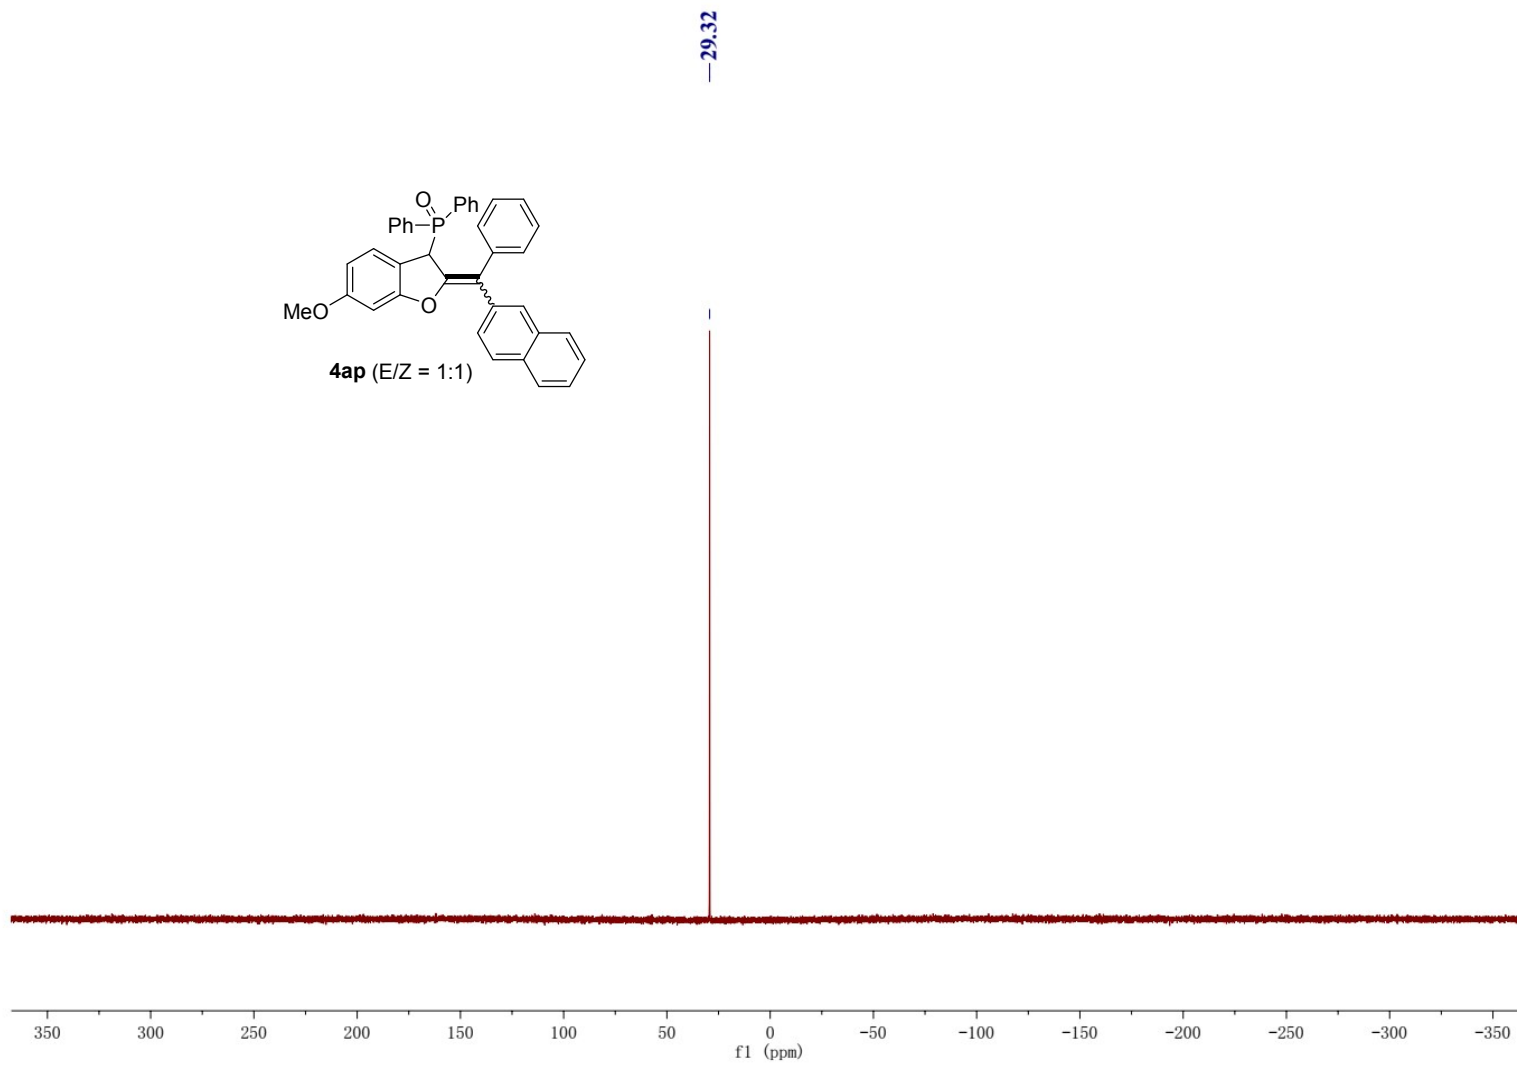



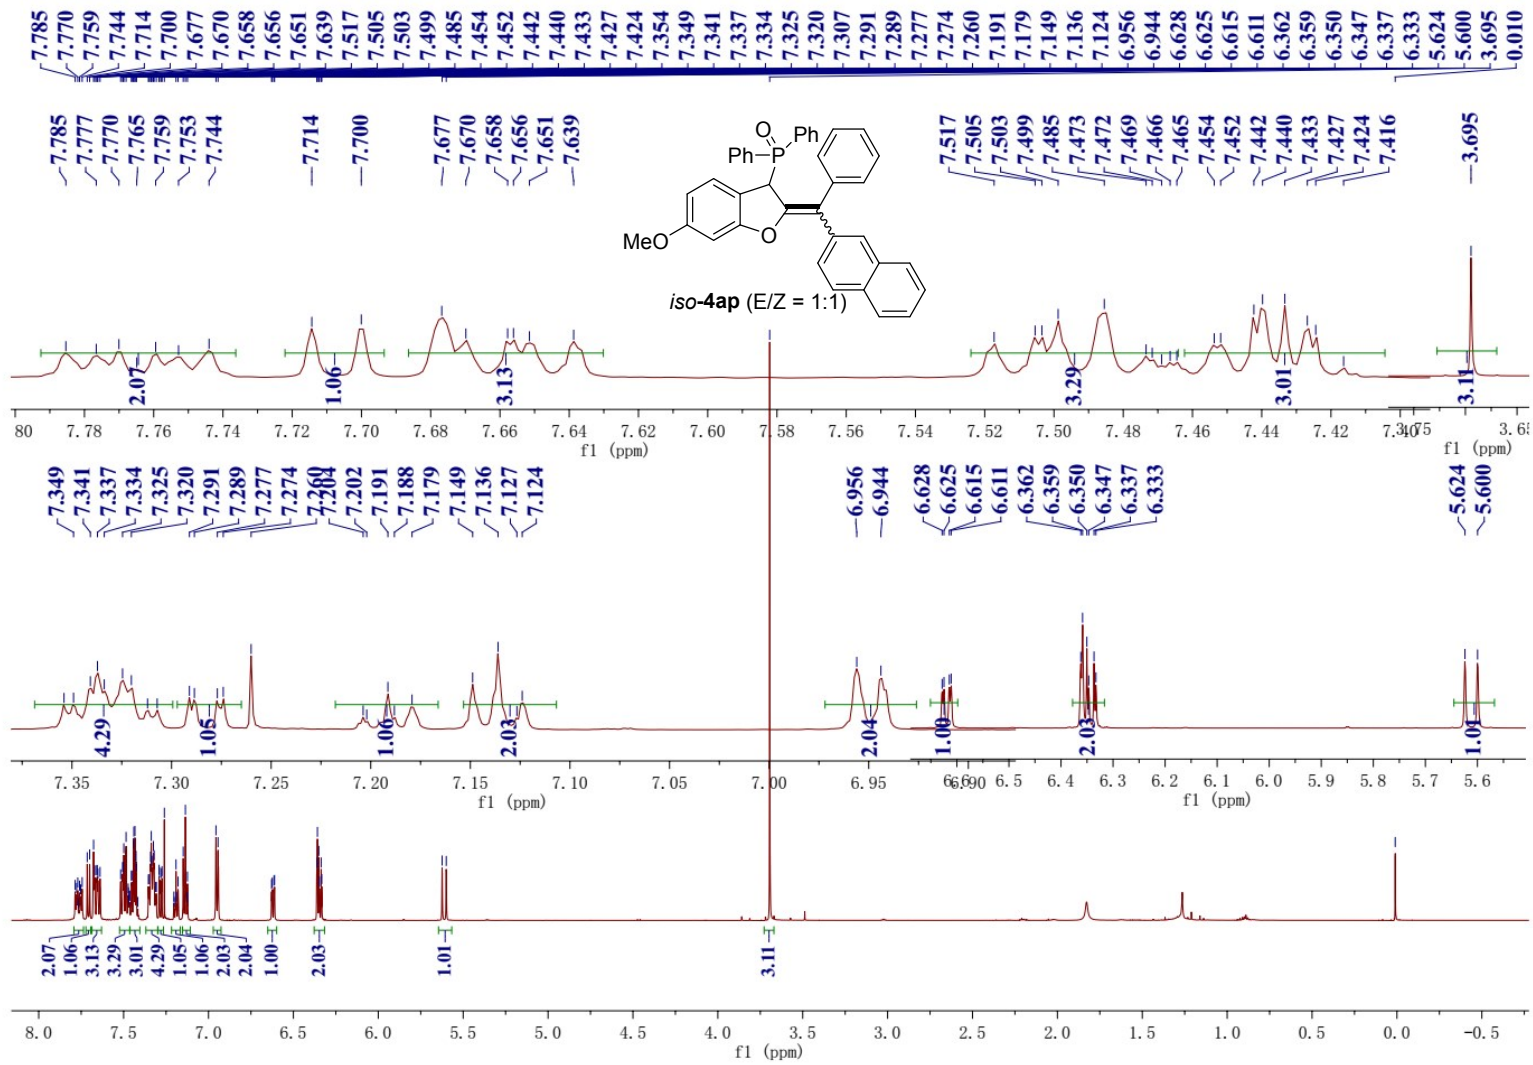



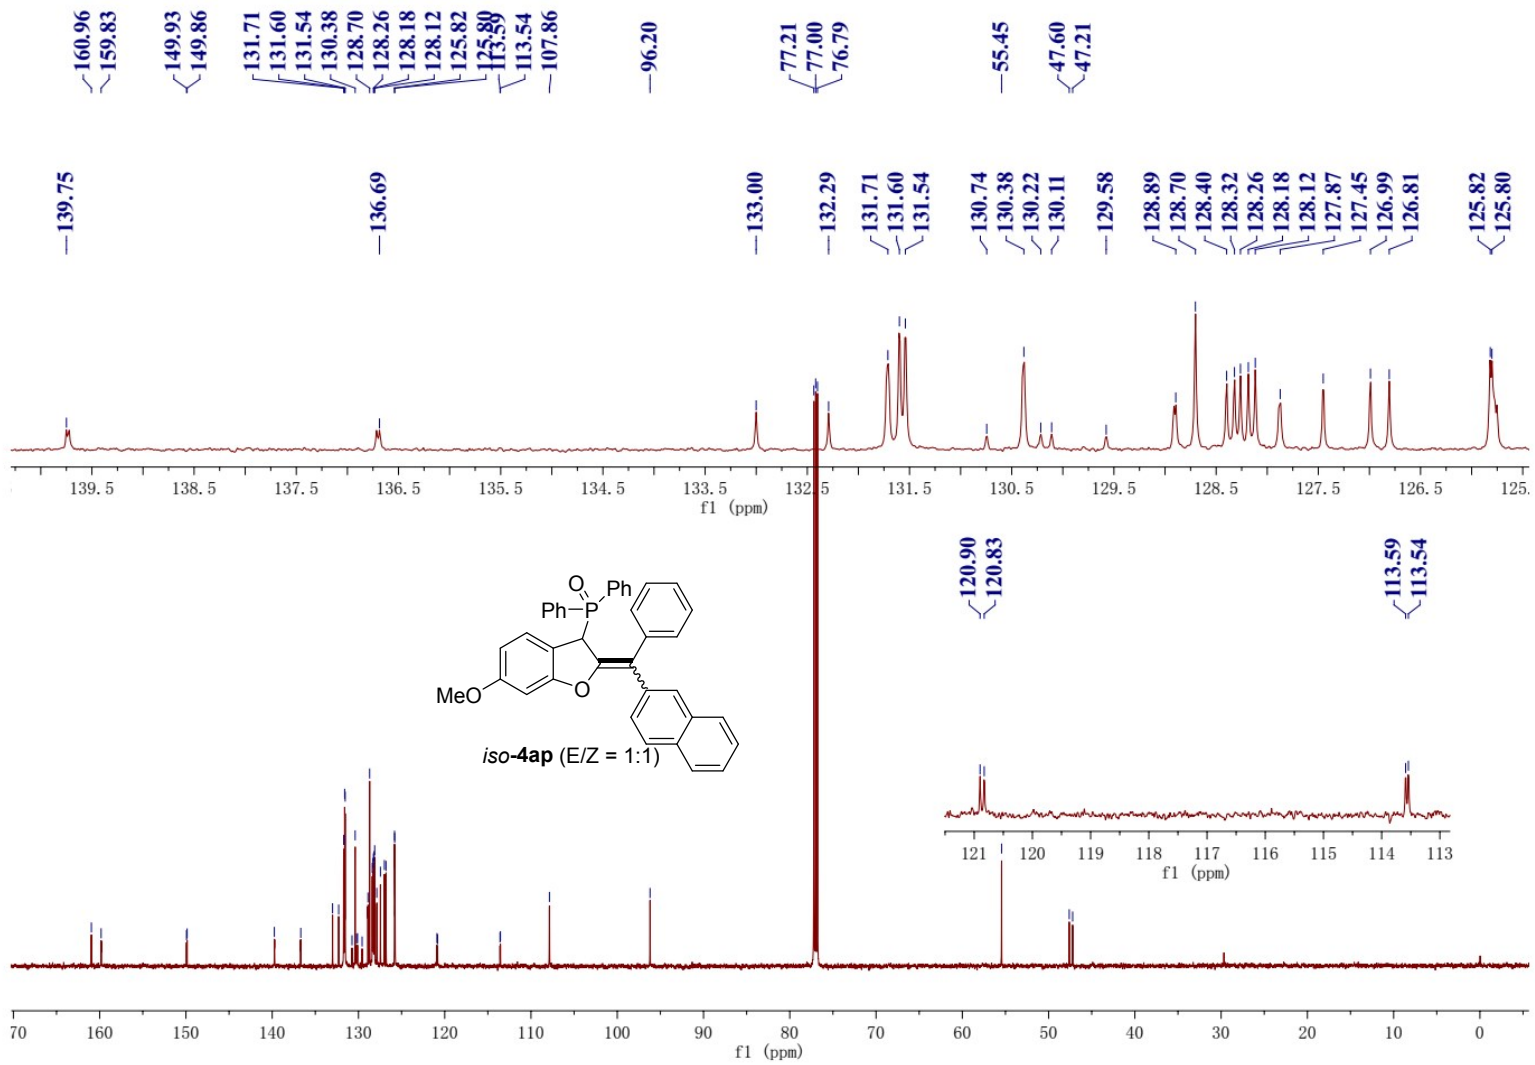

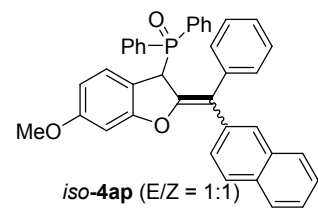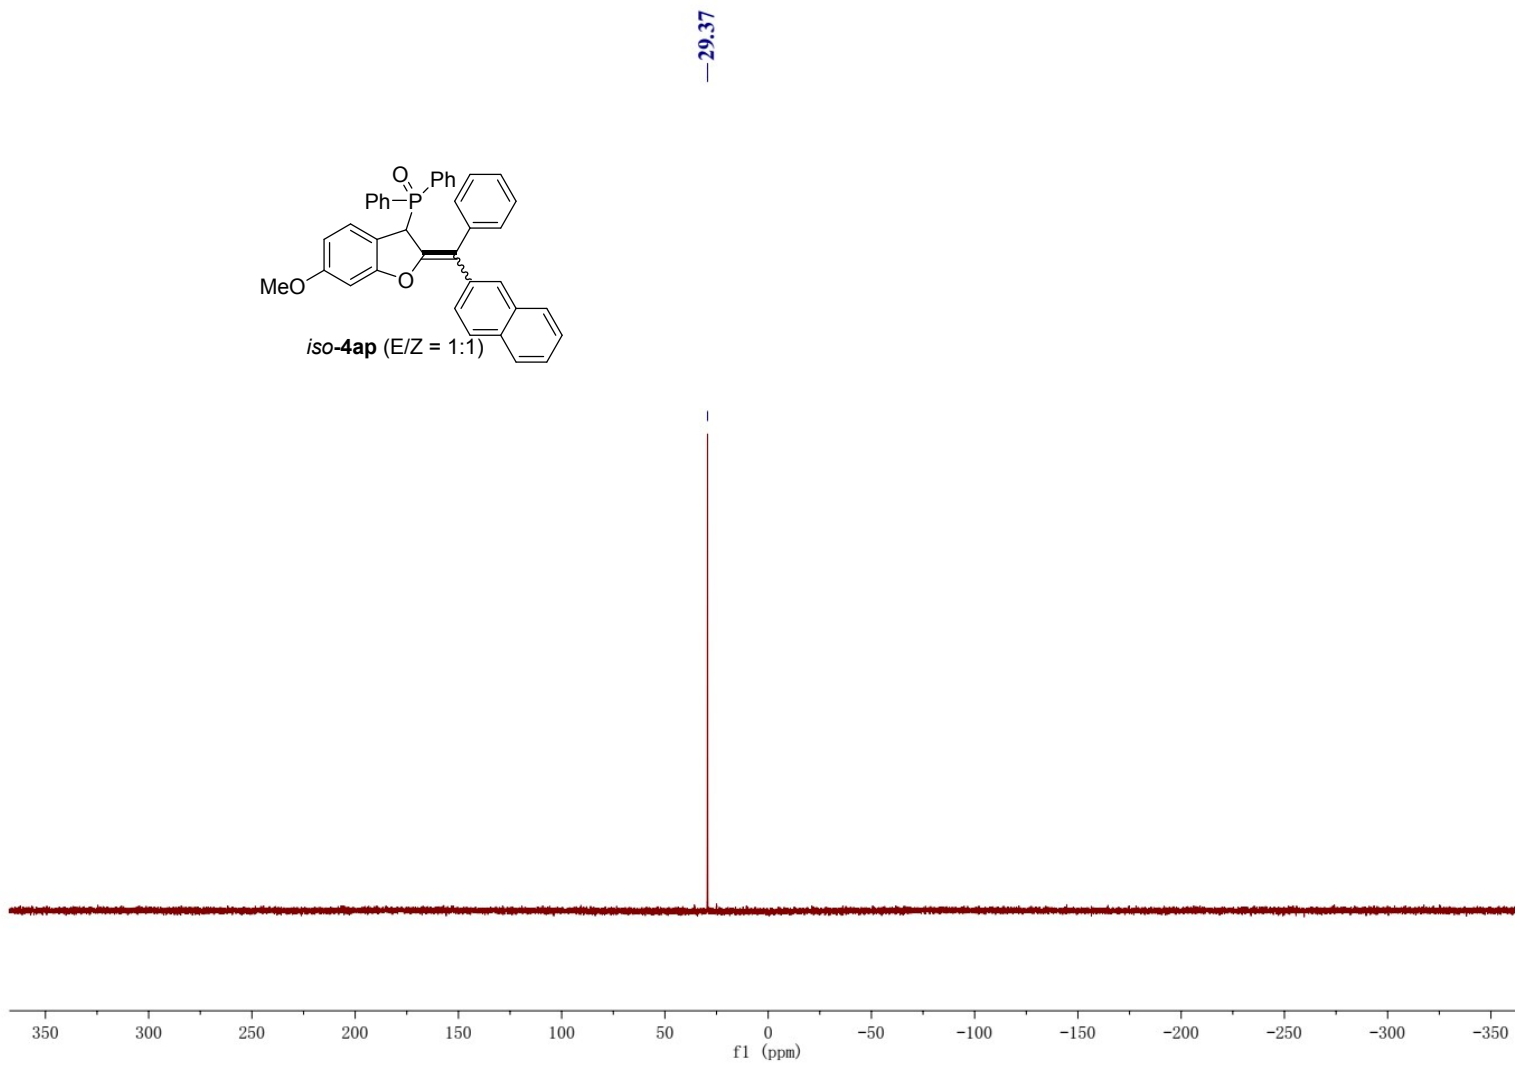



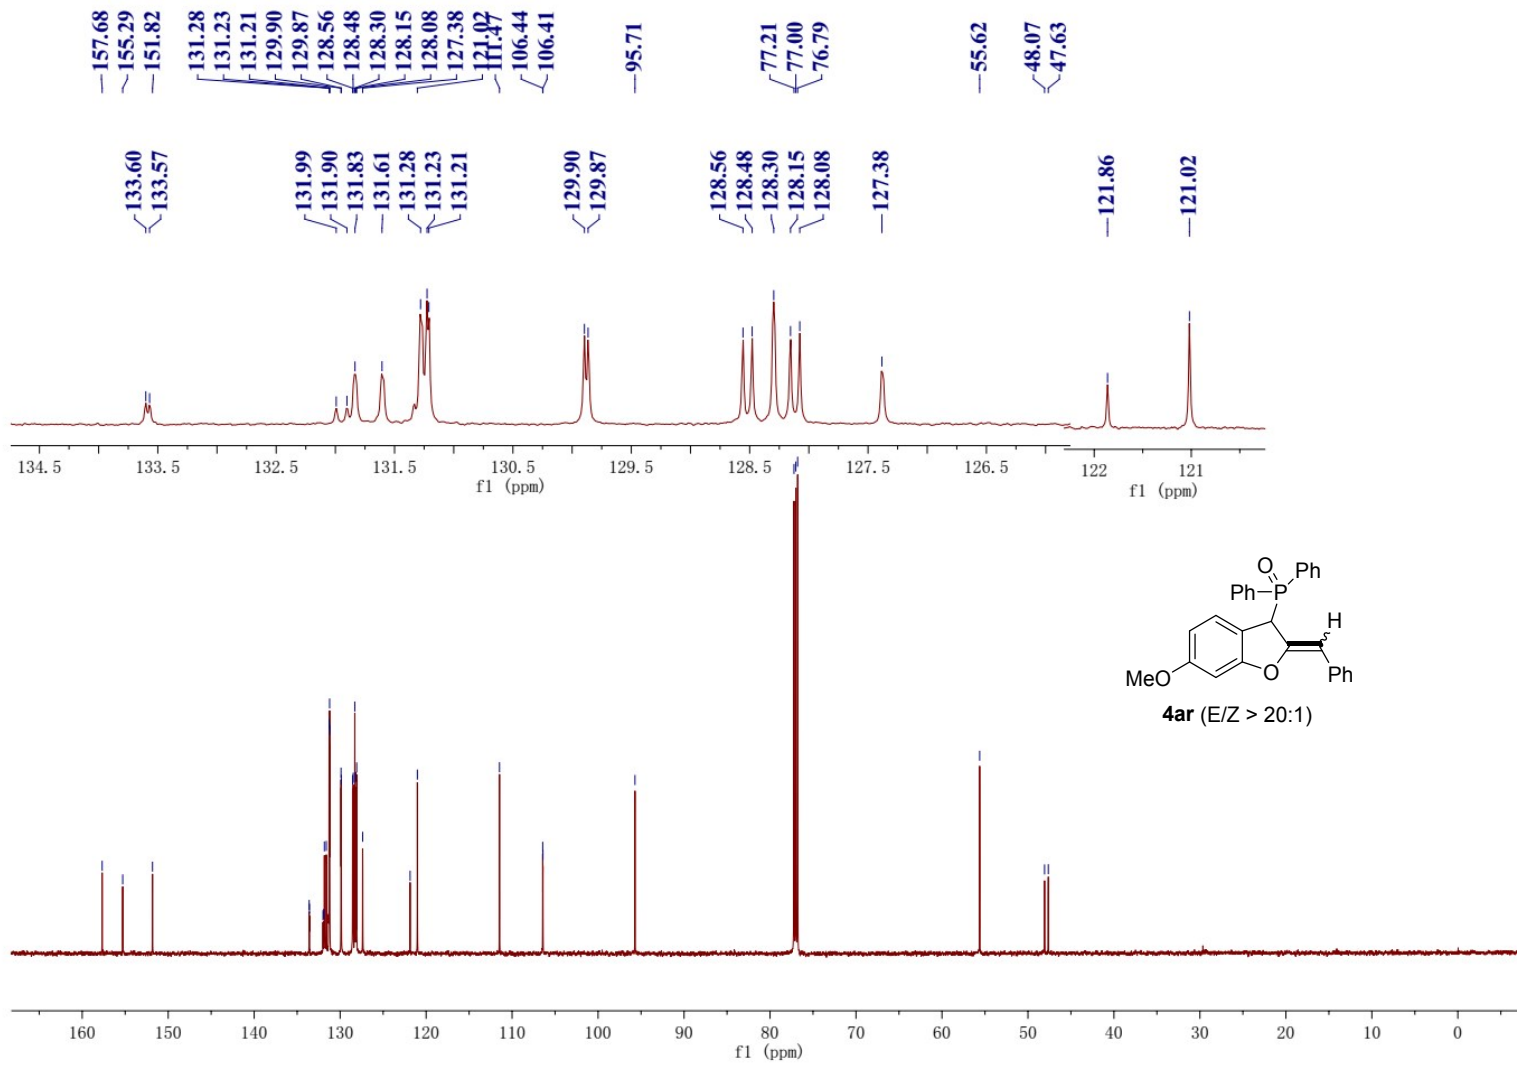

—30.22

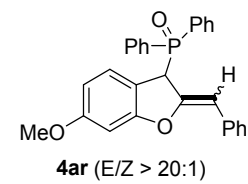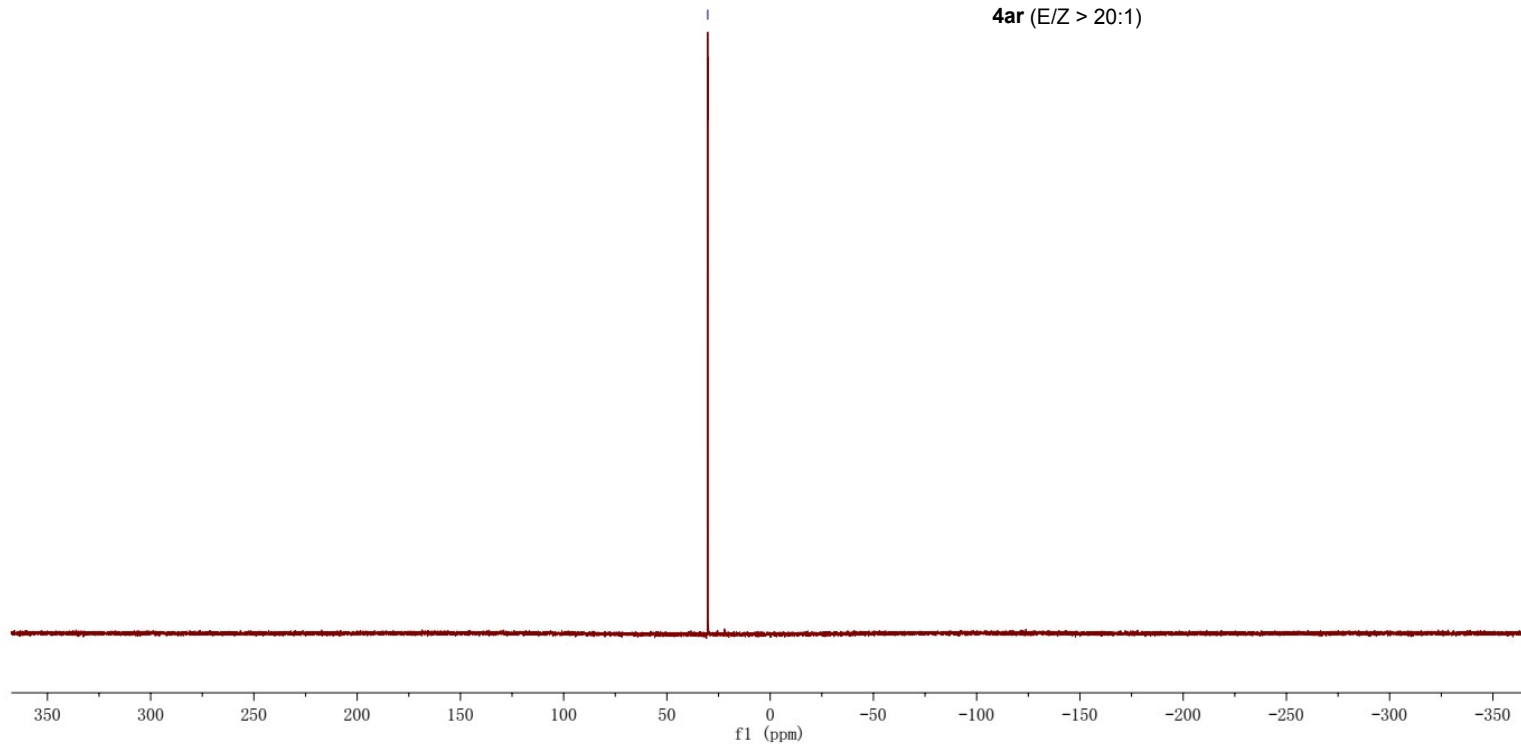

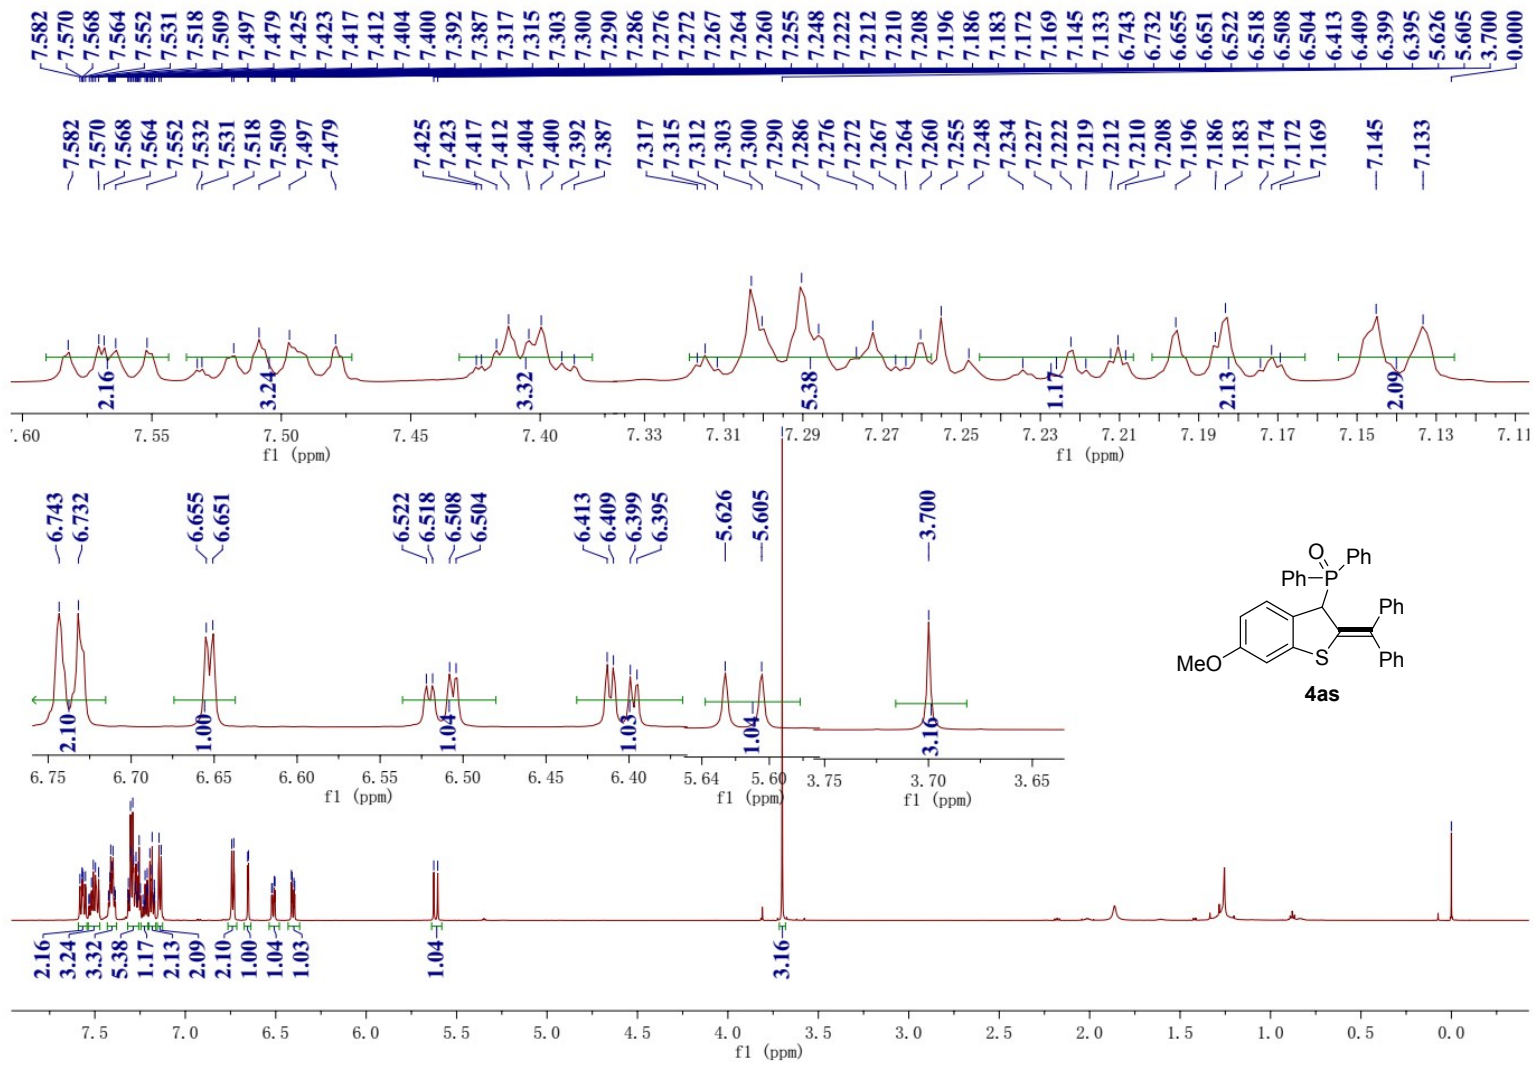

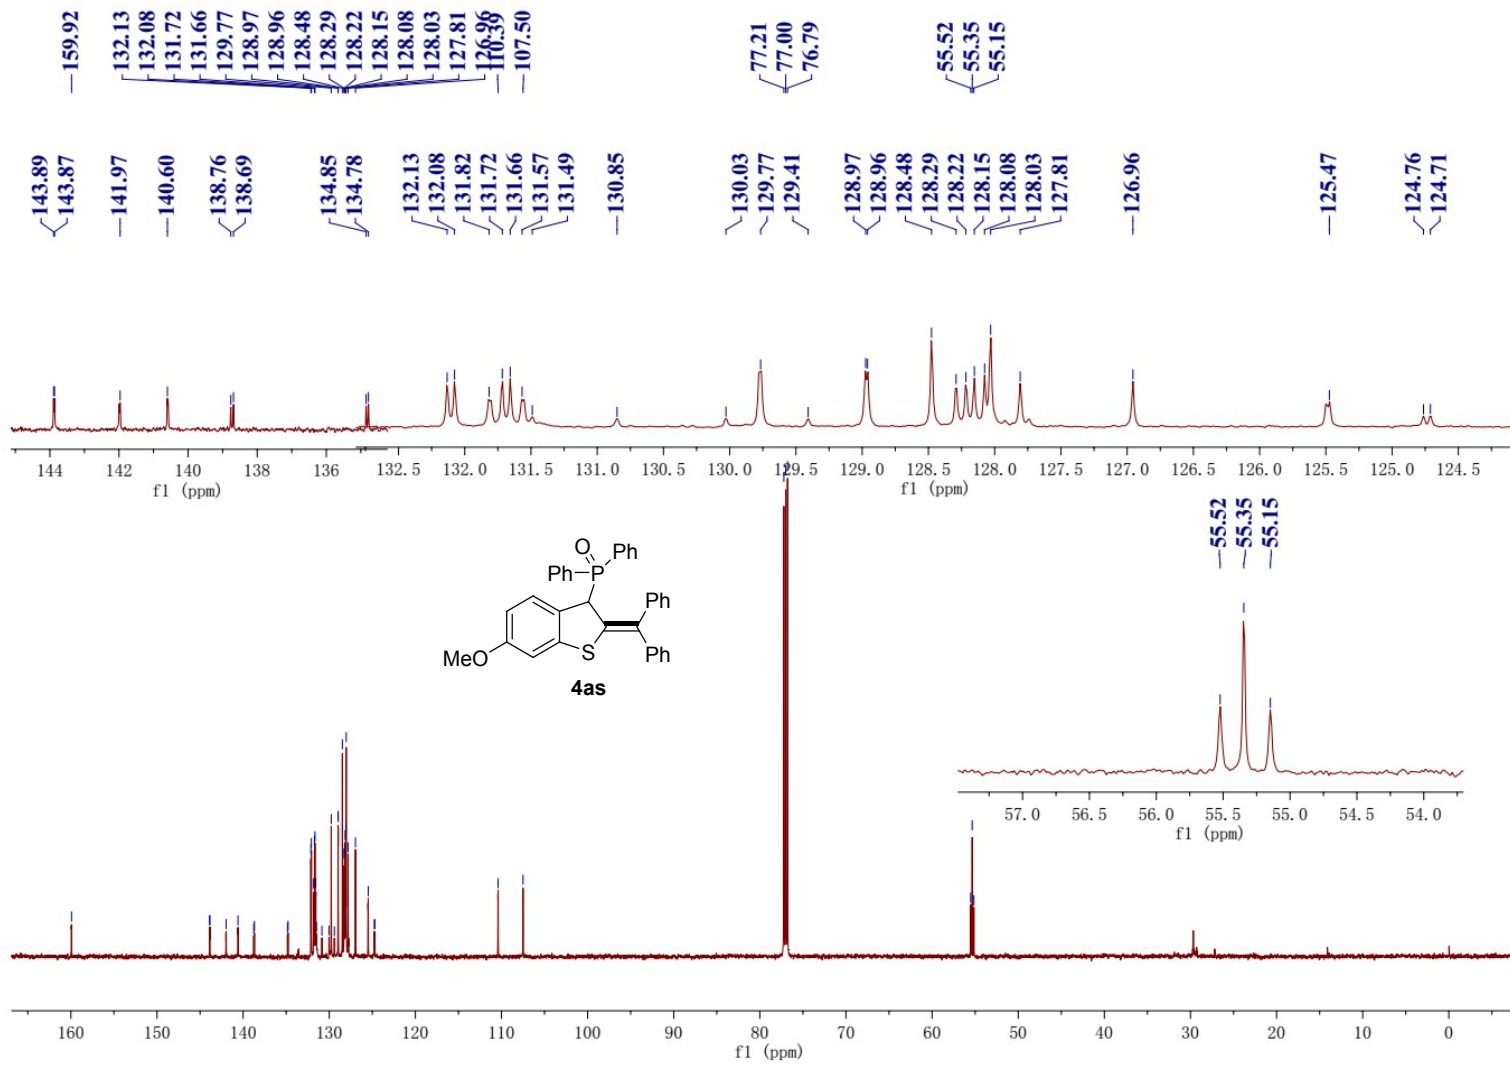

—31.90

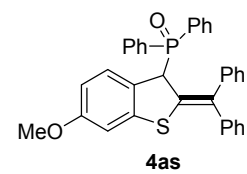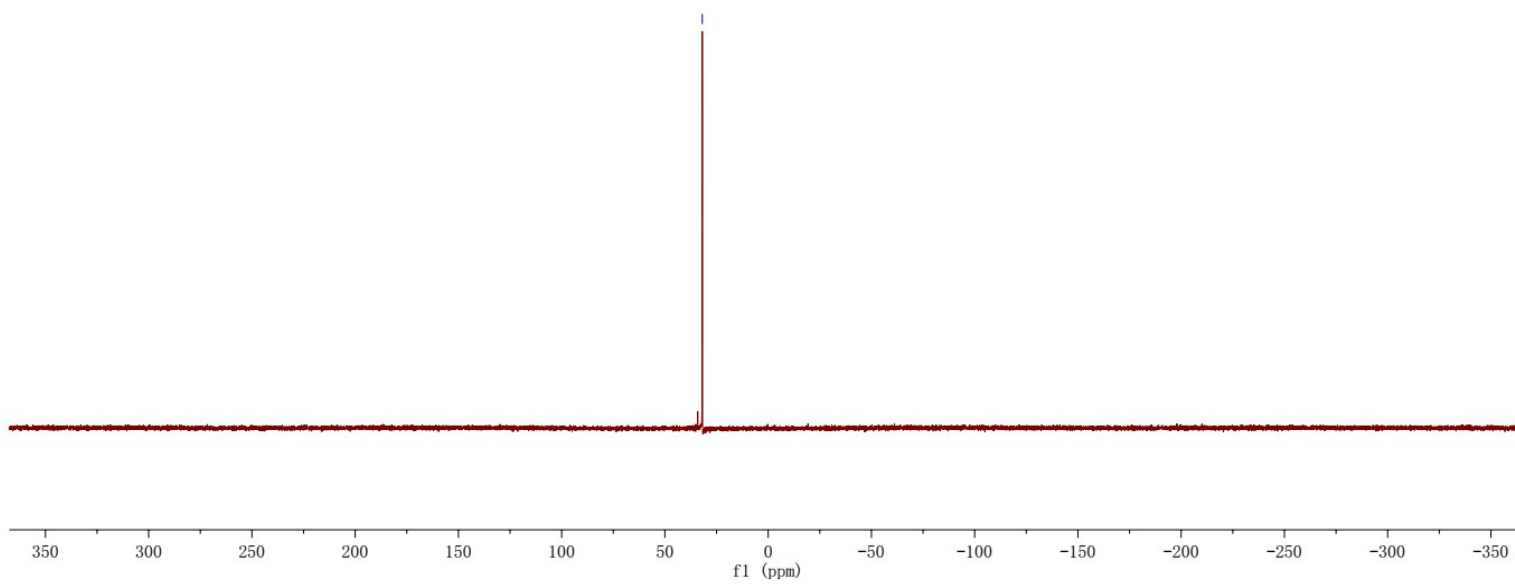



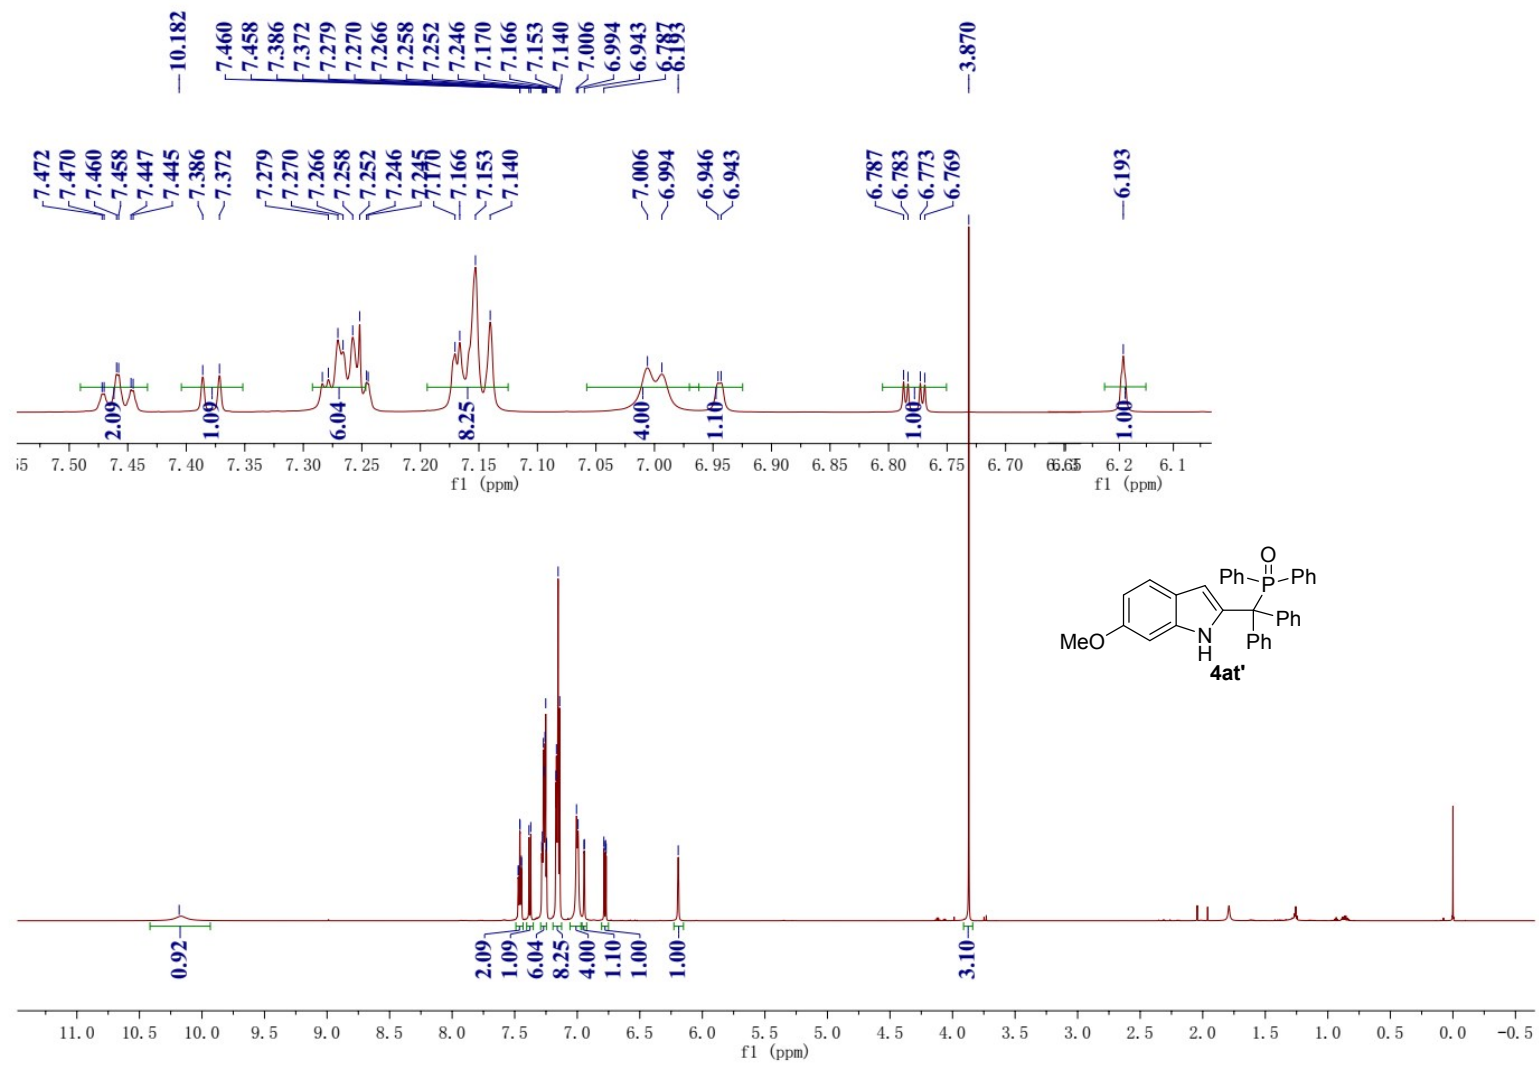

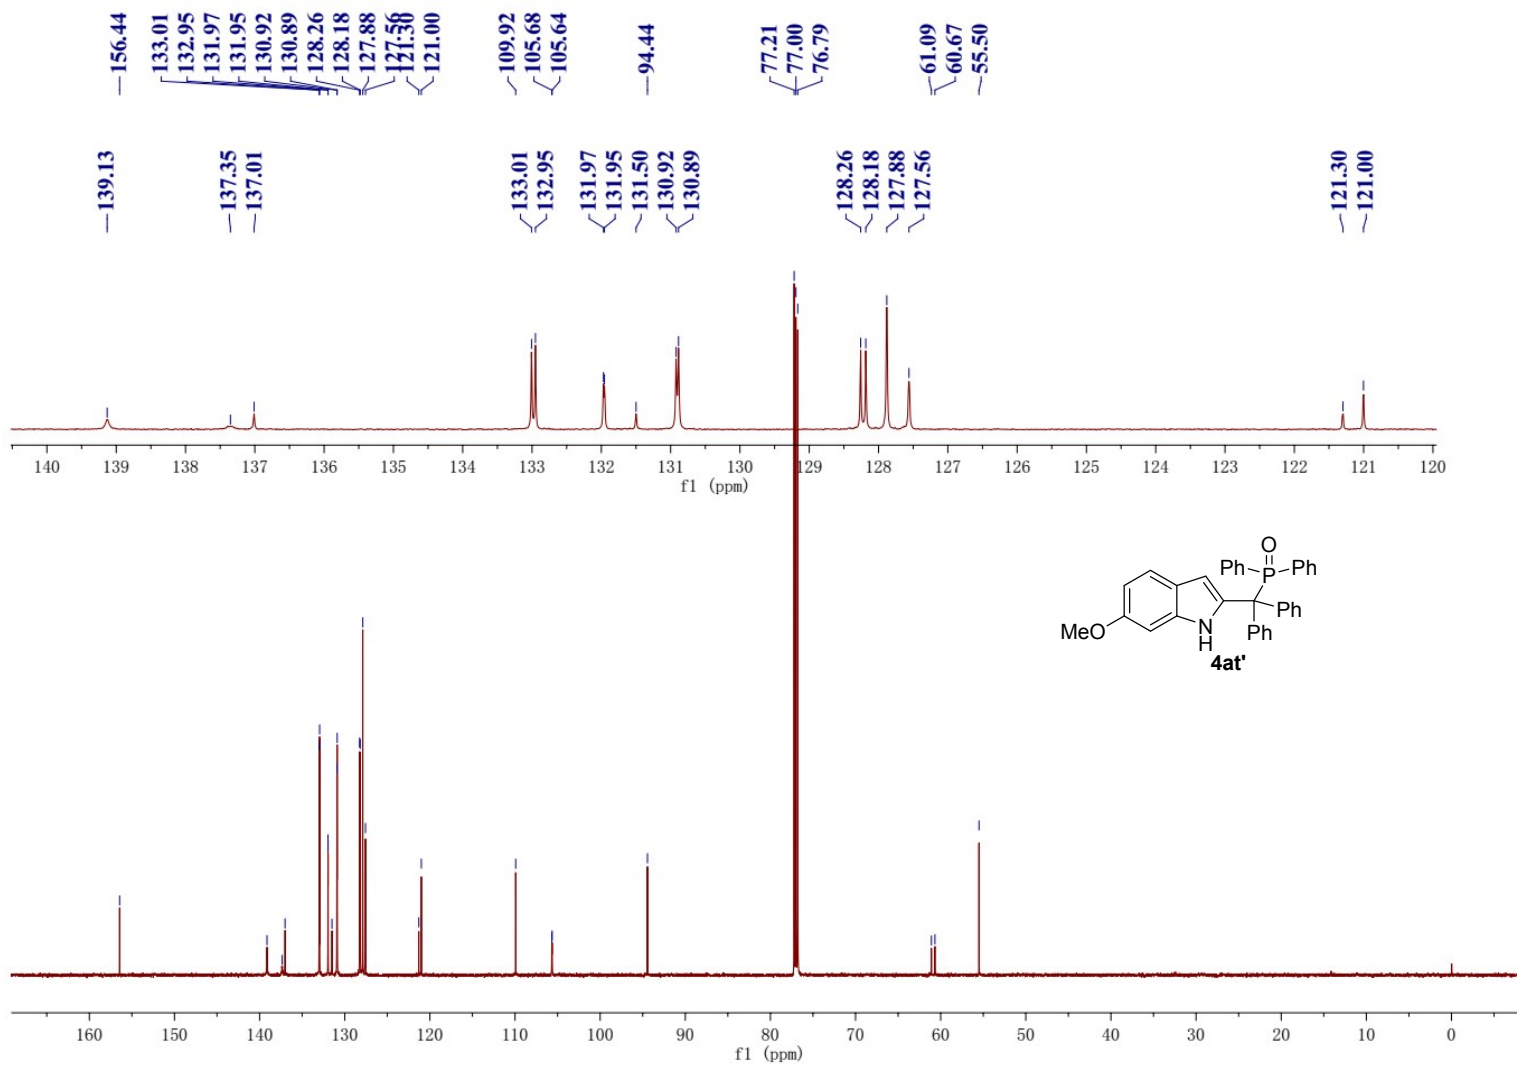

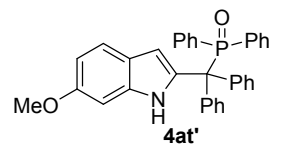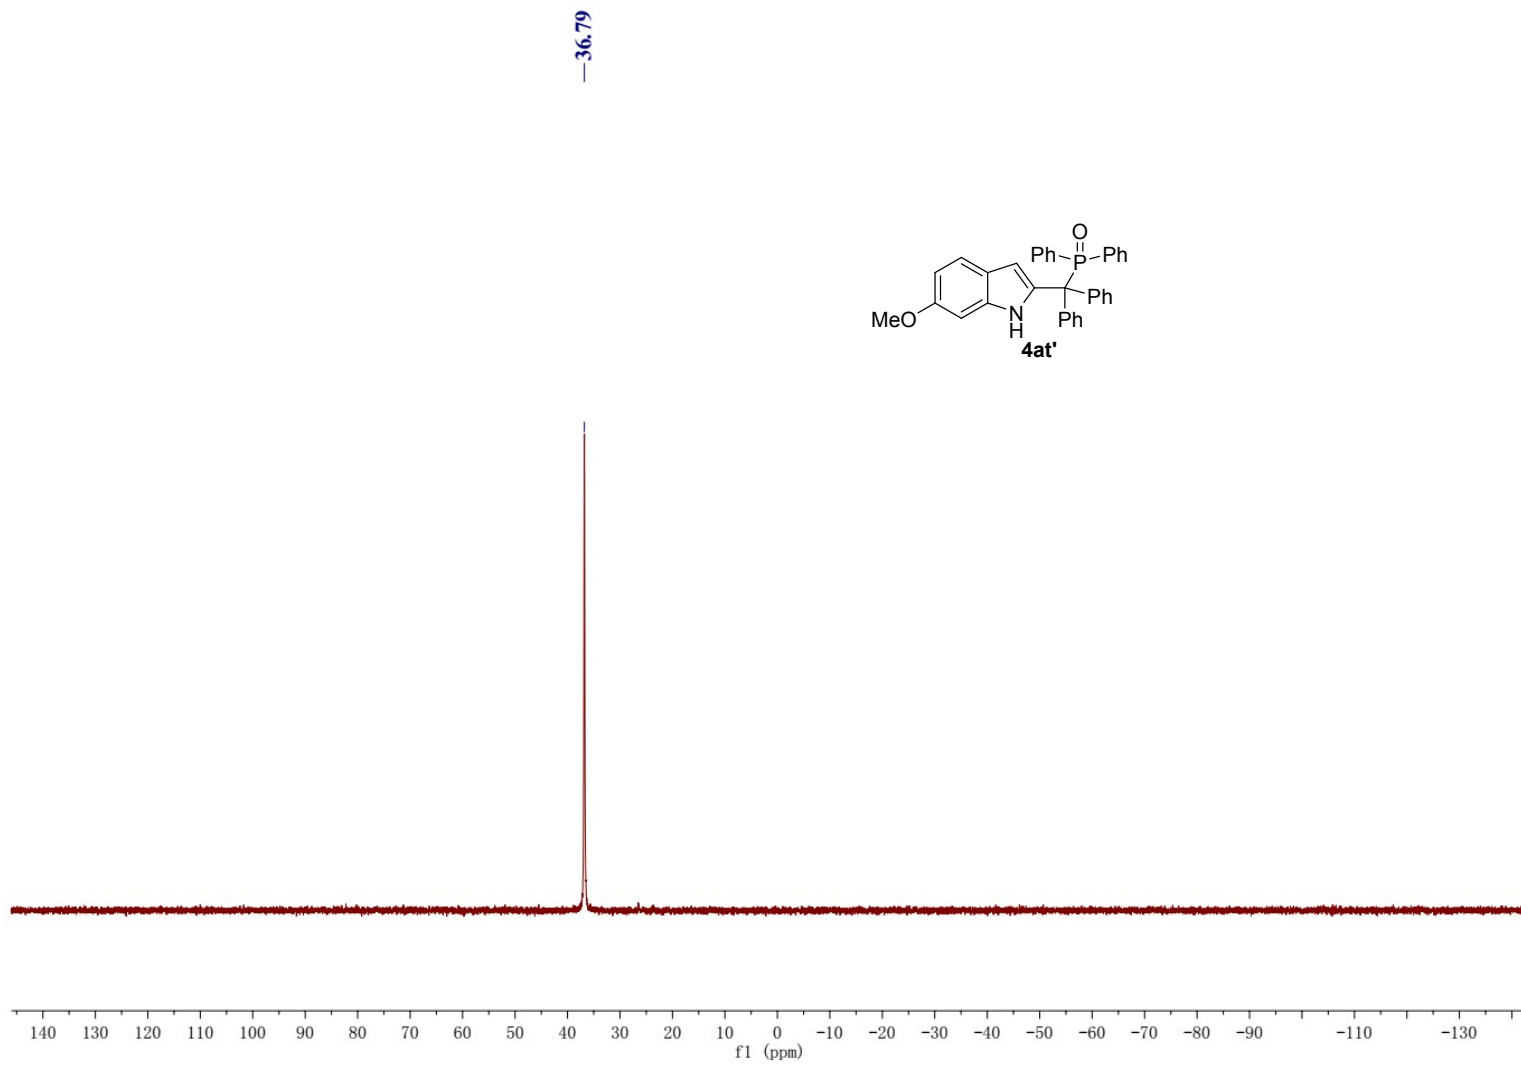

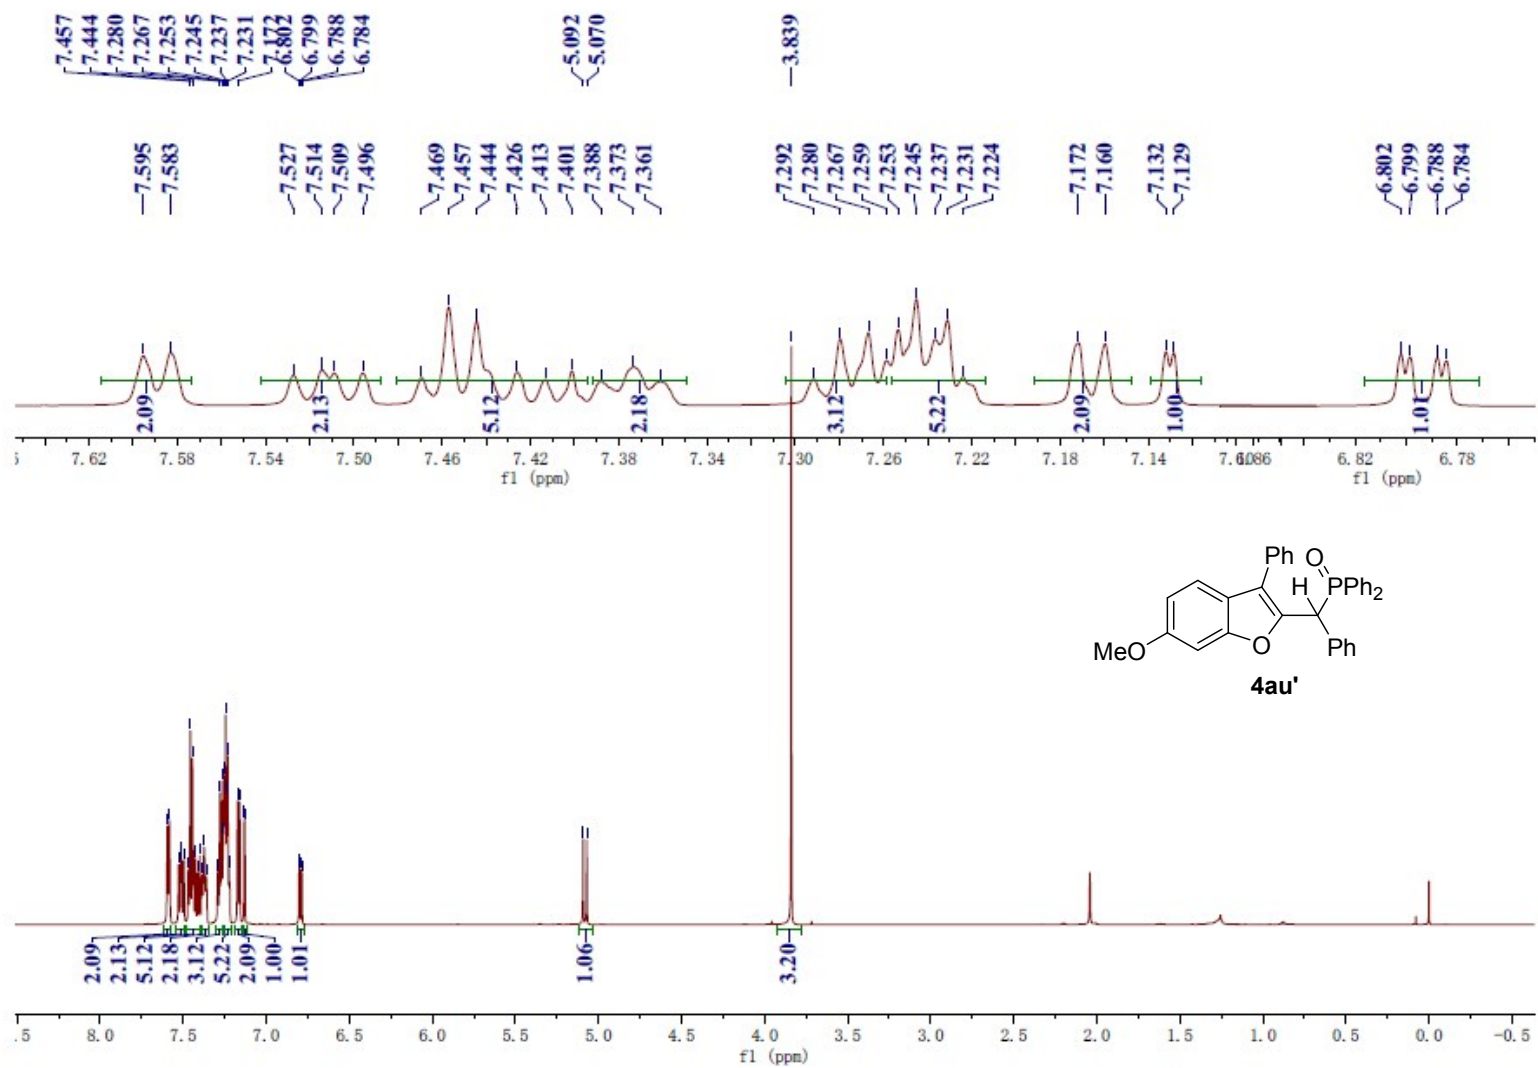



—30.19

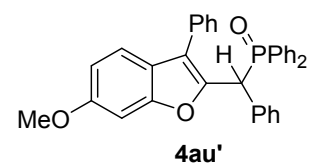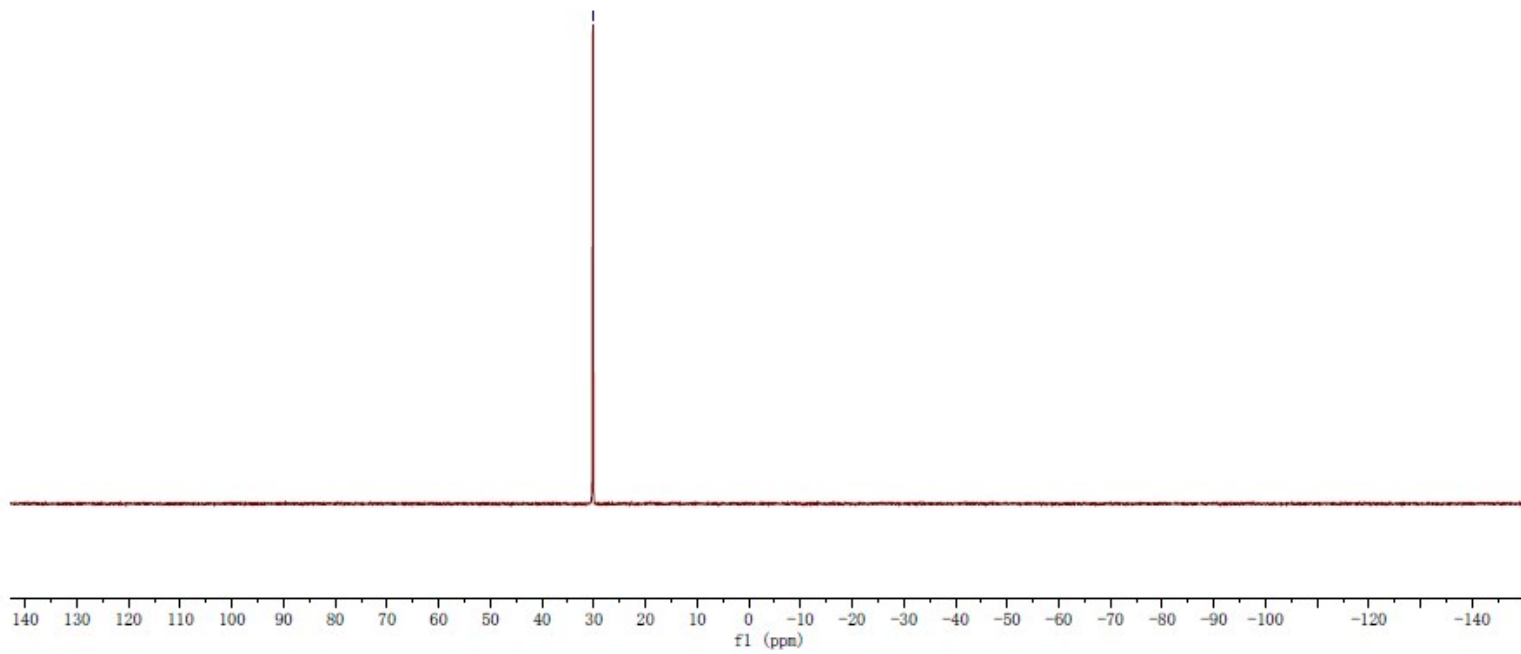

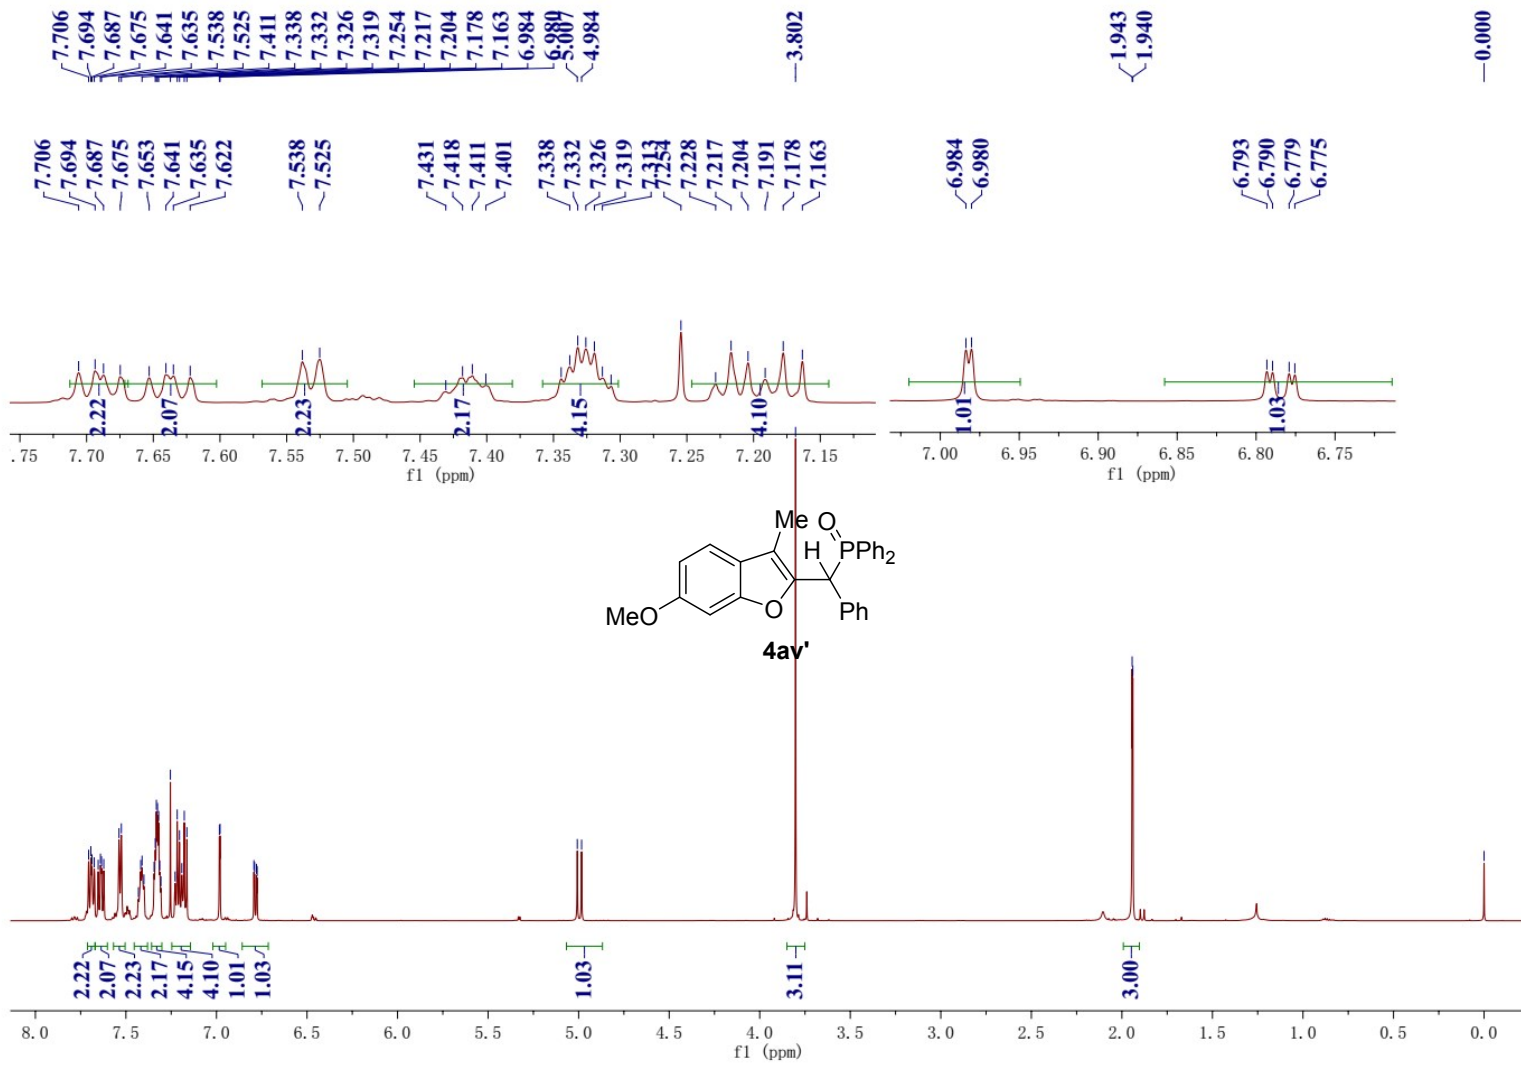

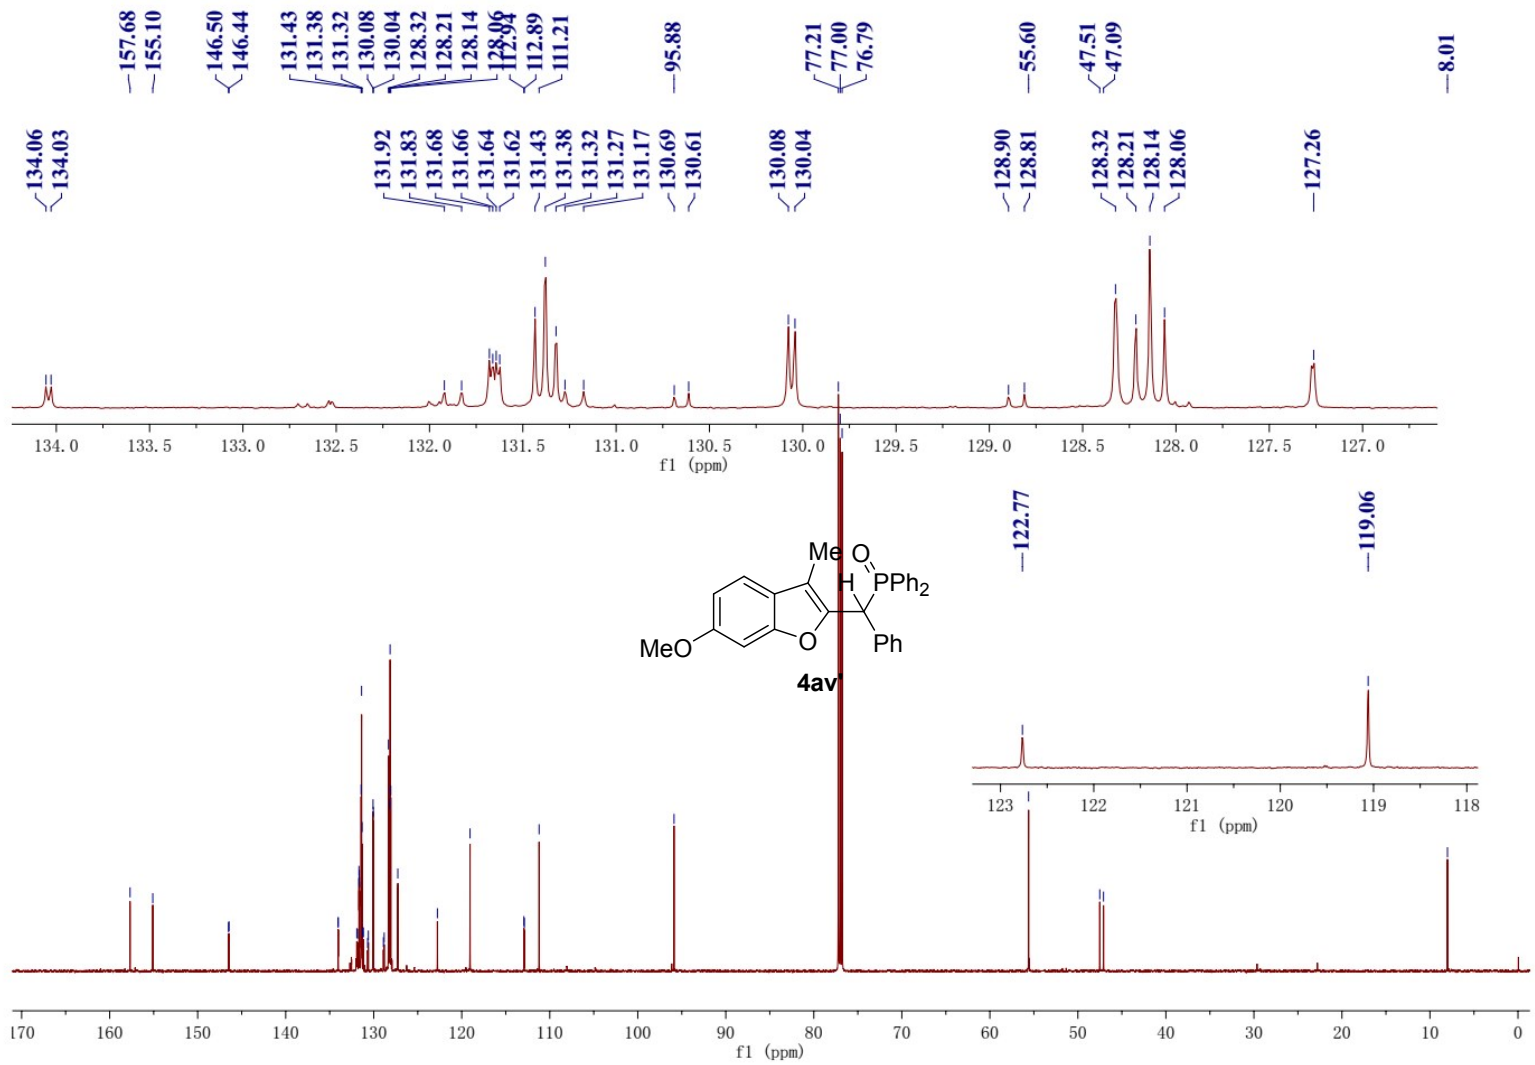



—29.94

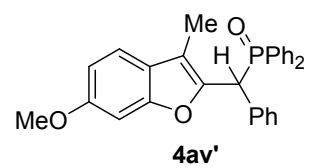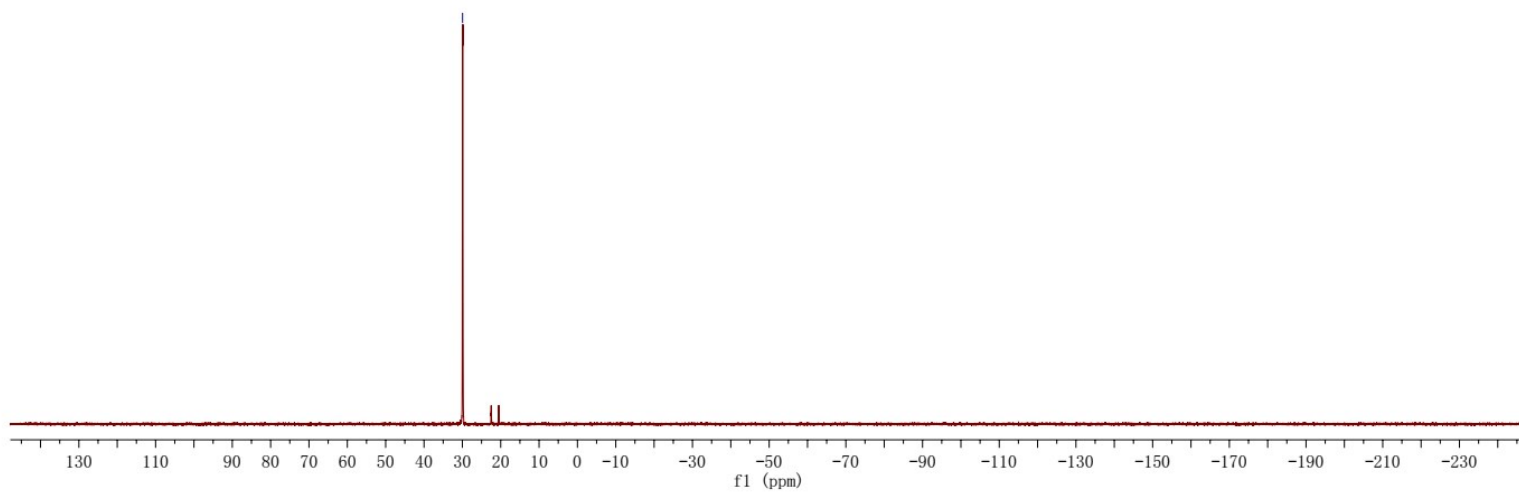

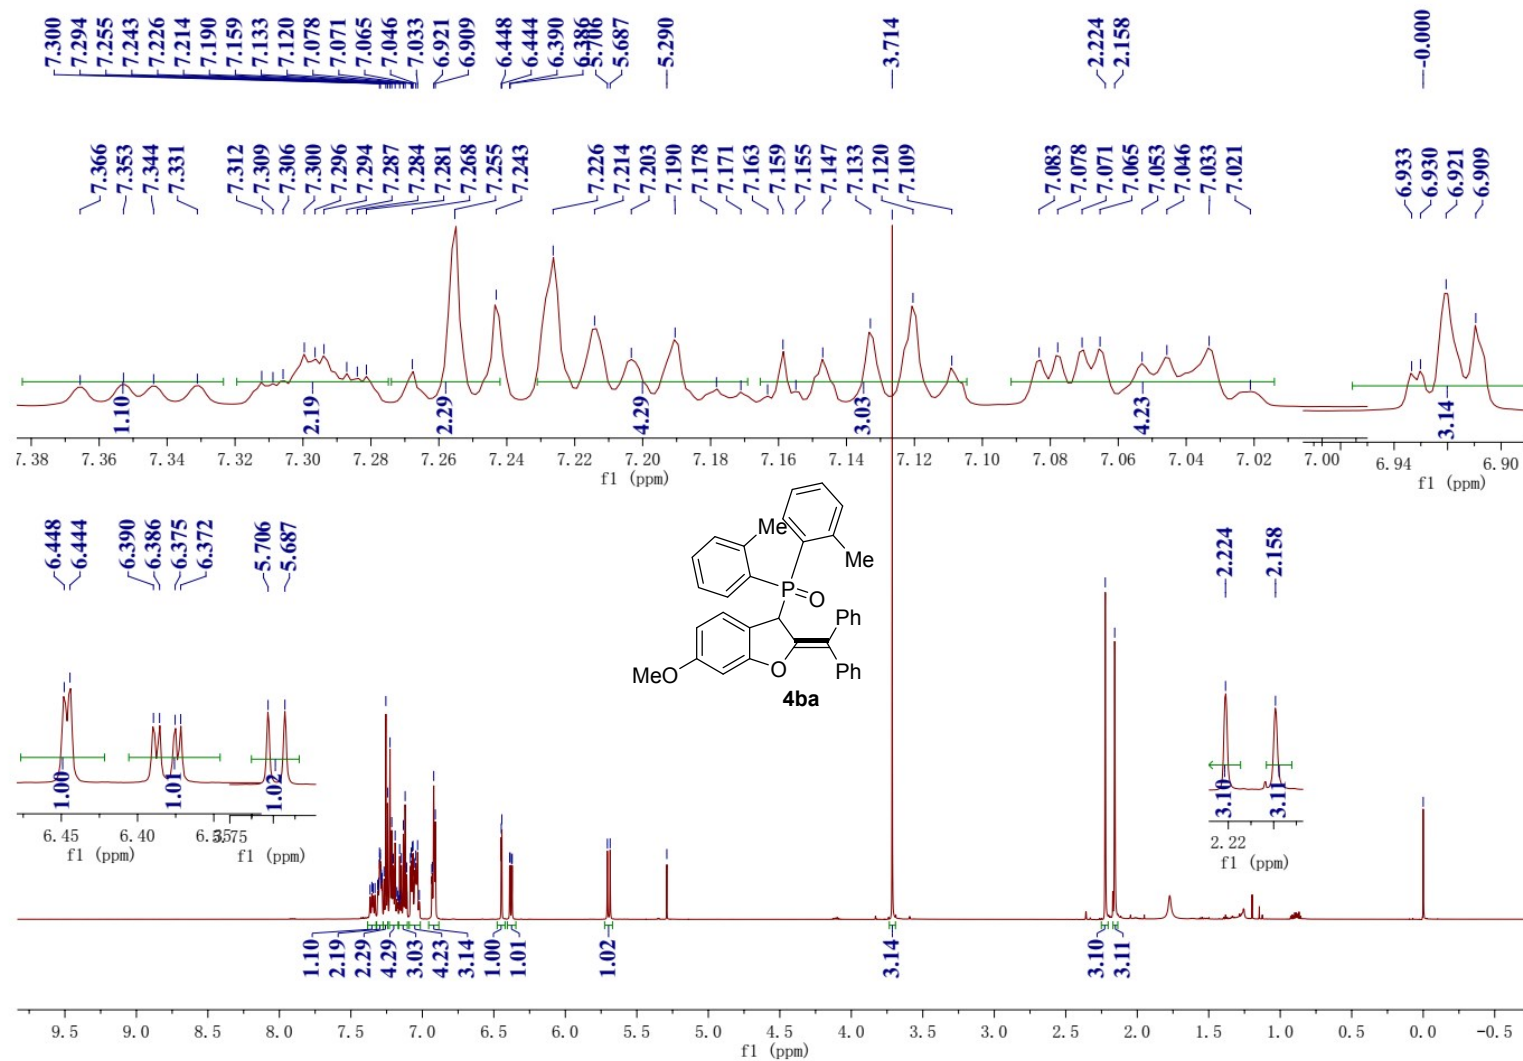



—36.02

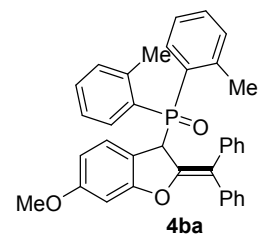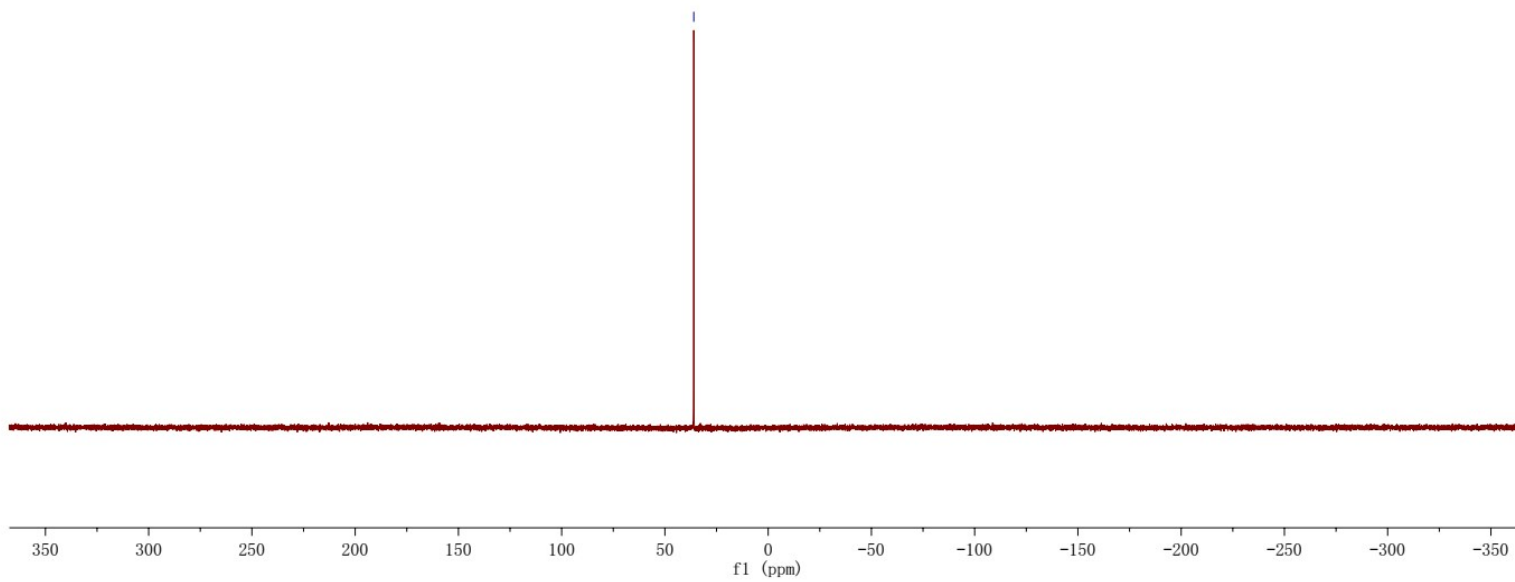

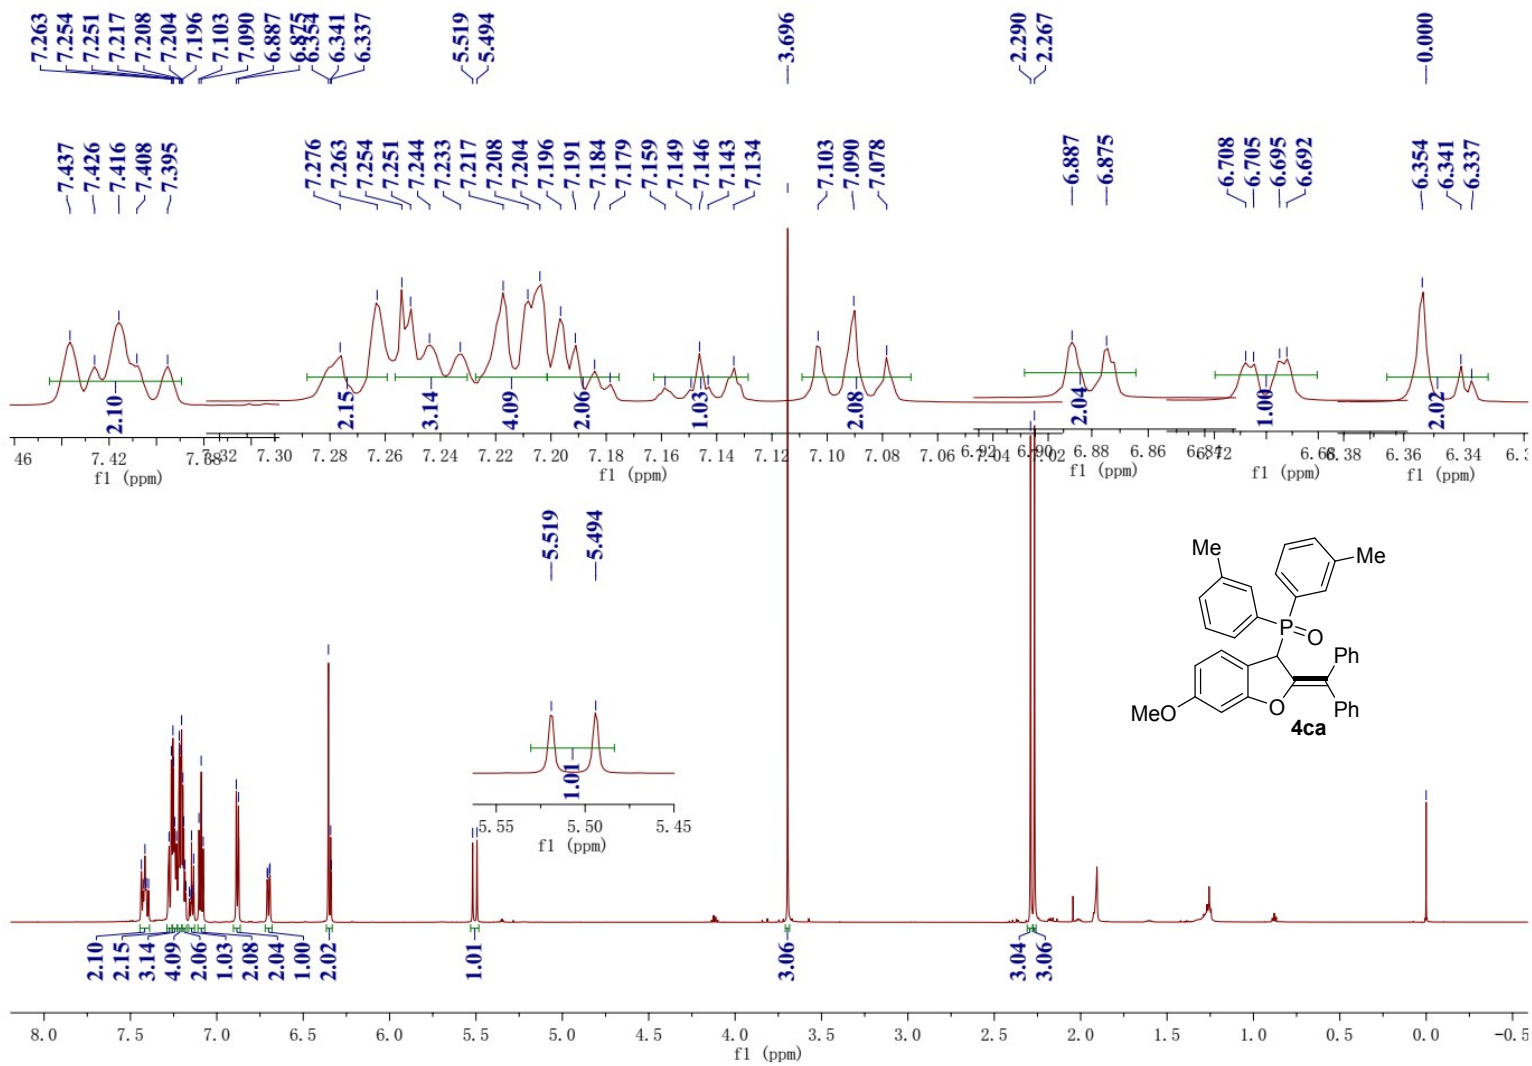

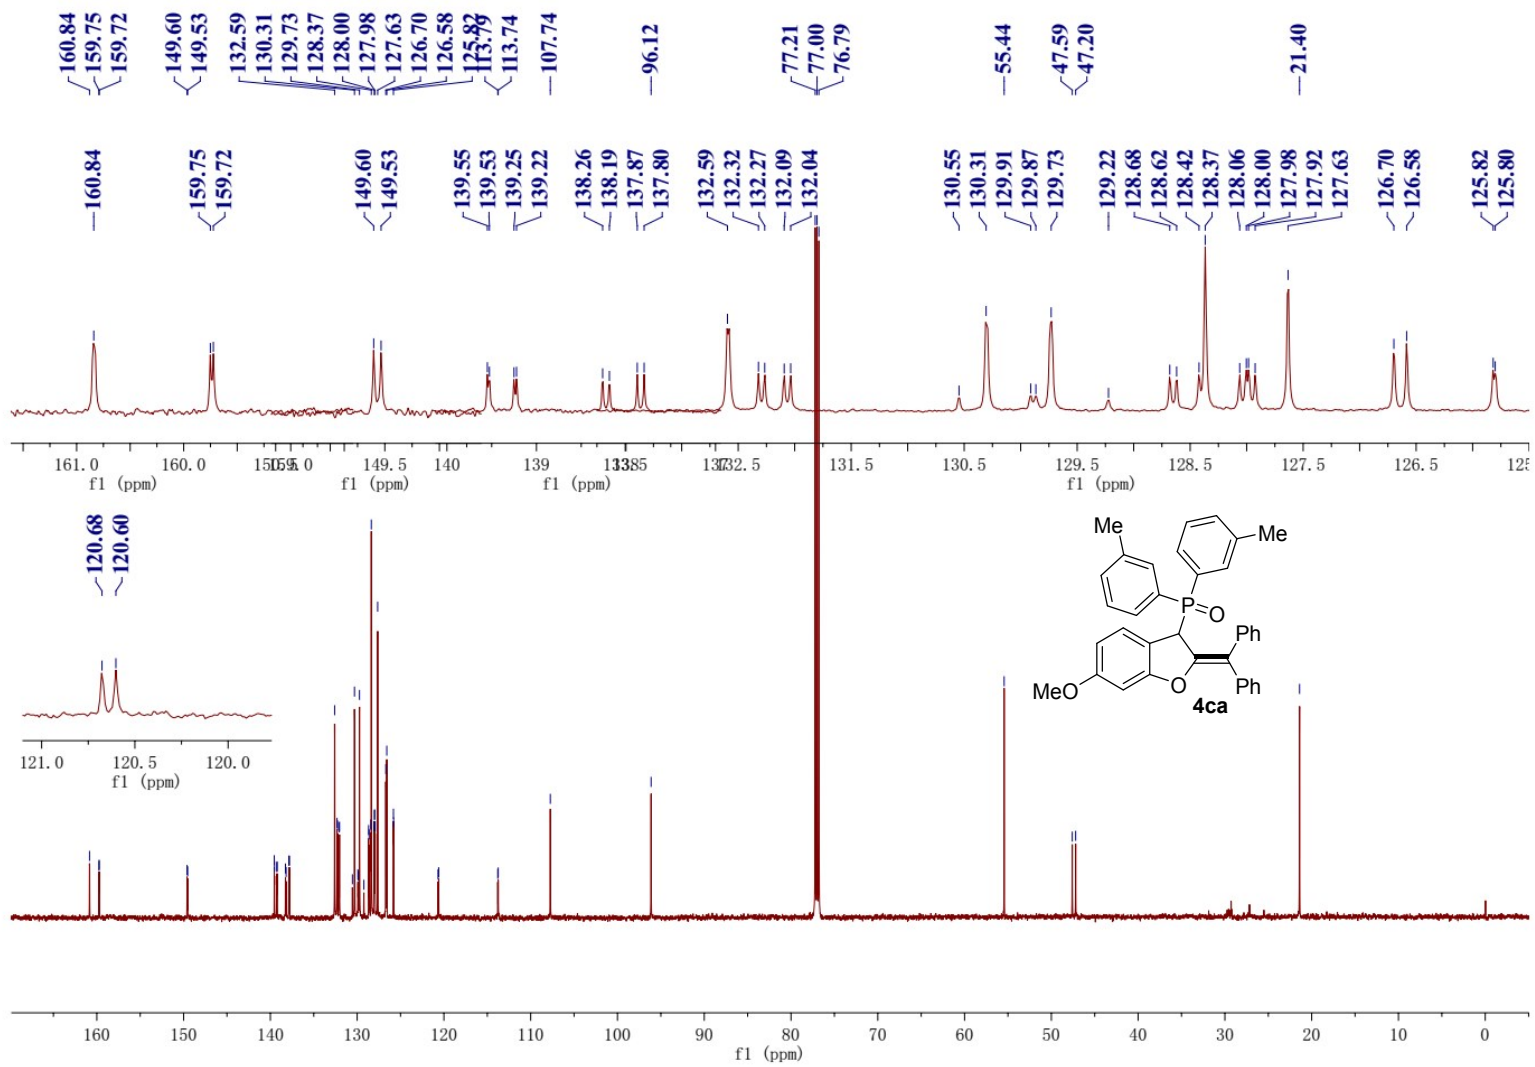

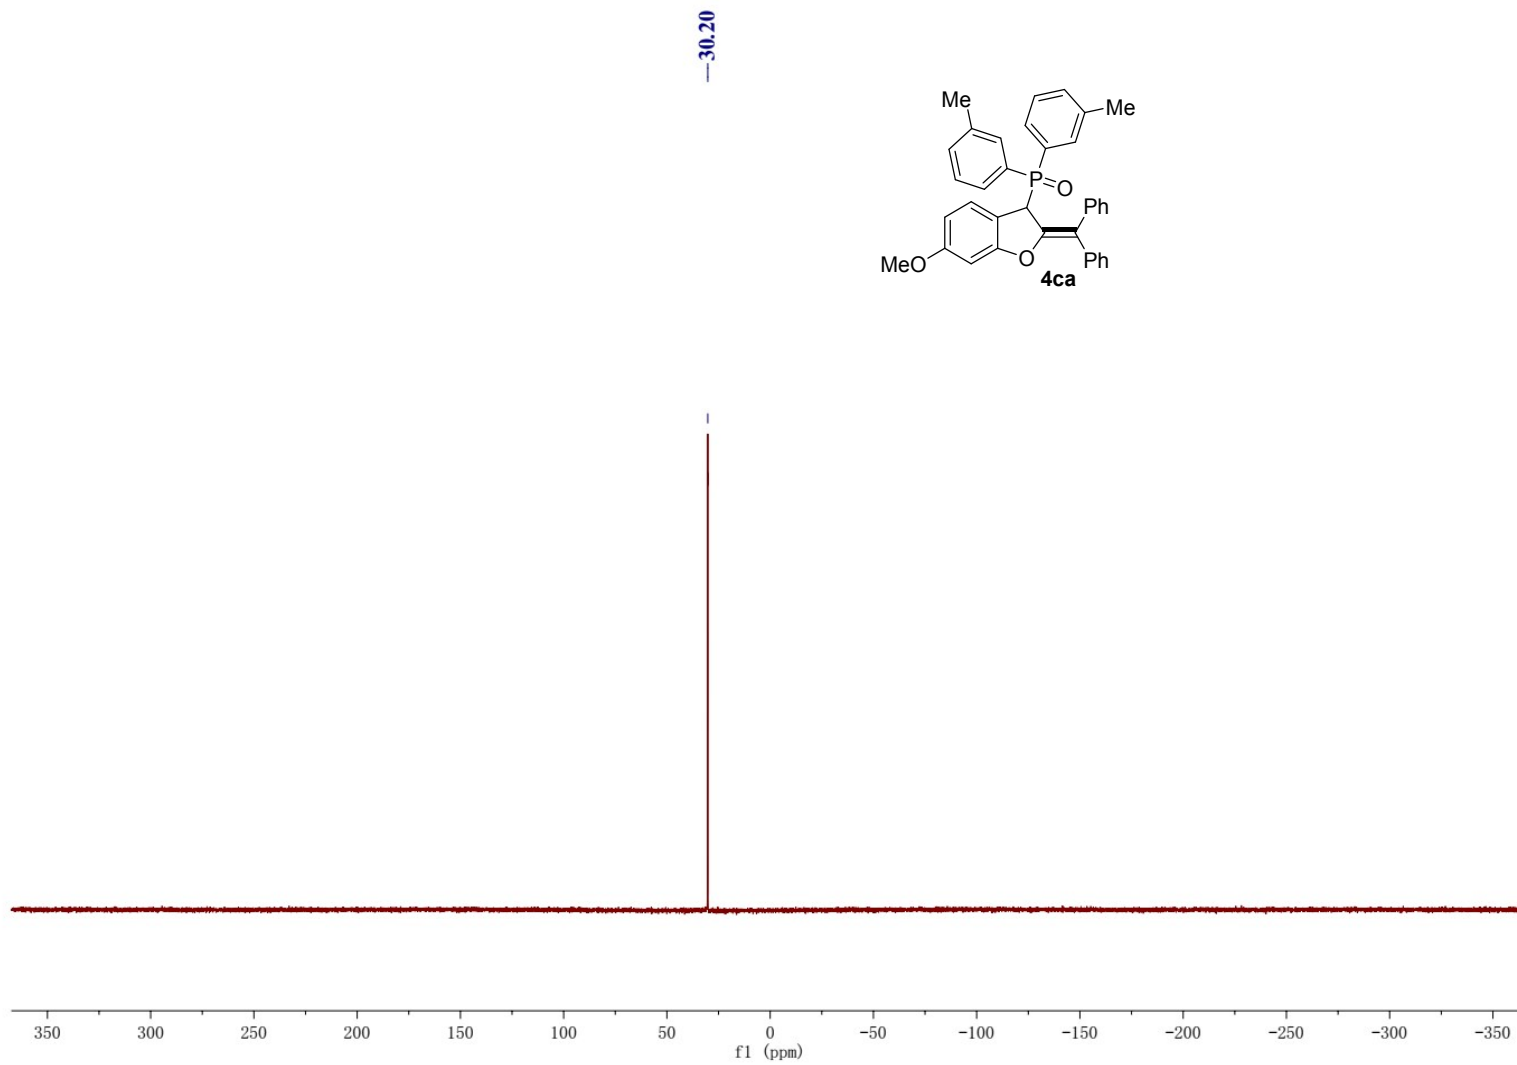

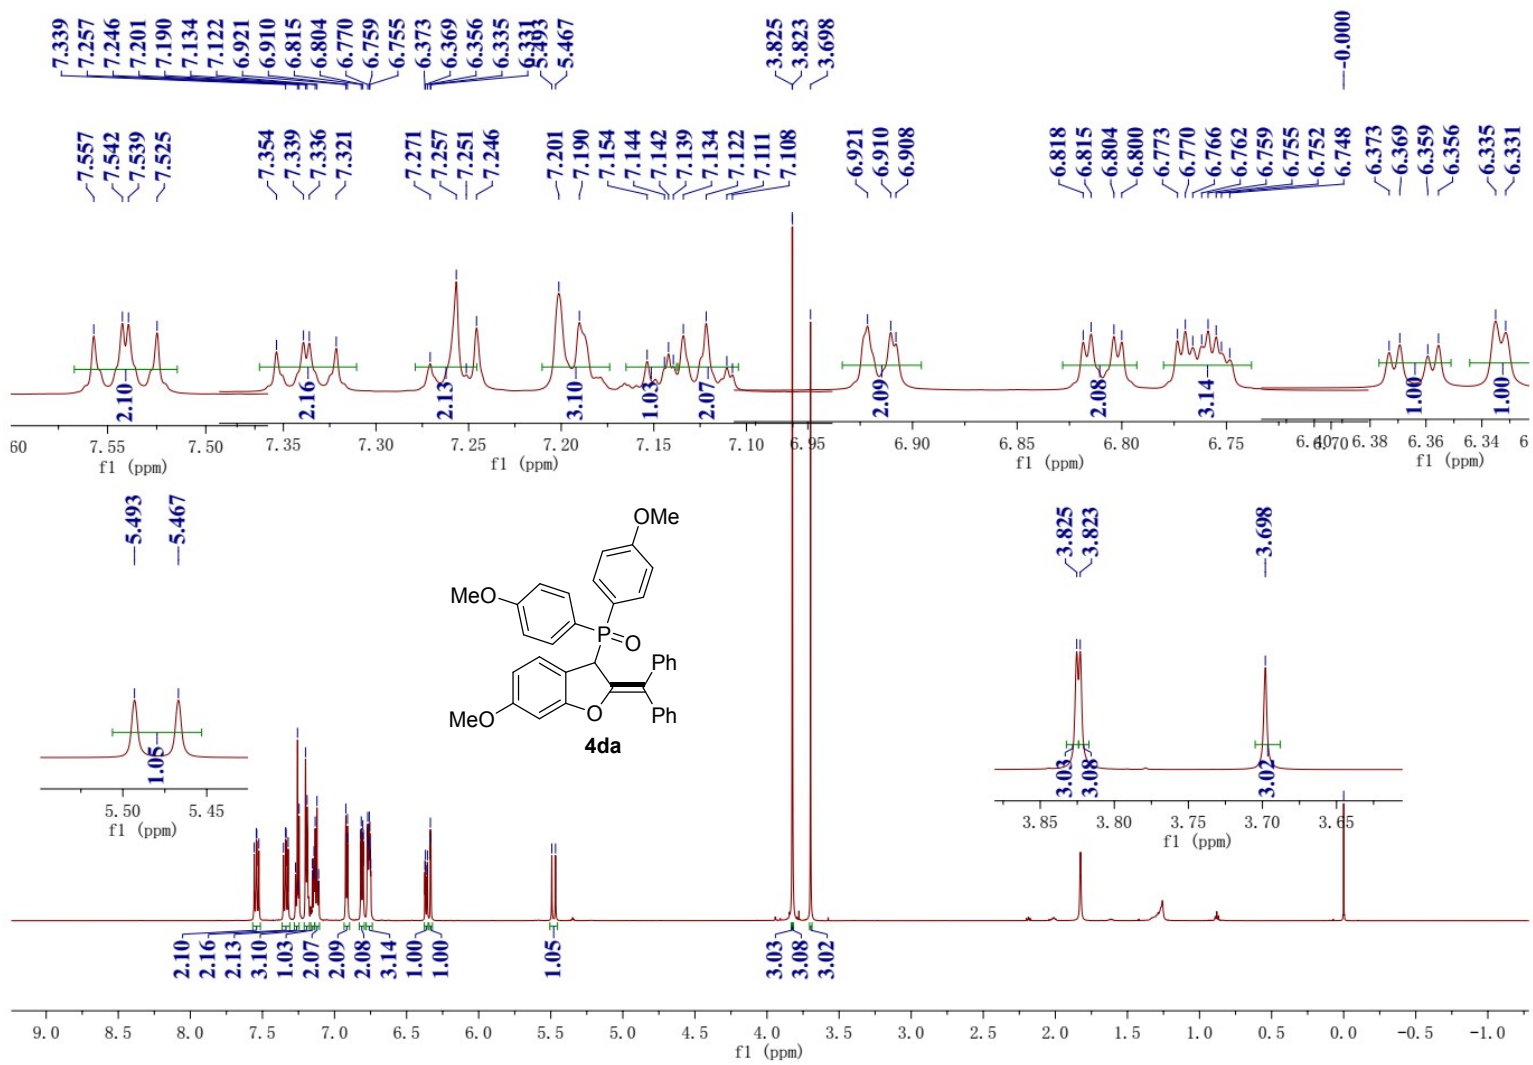



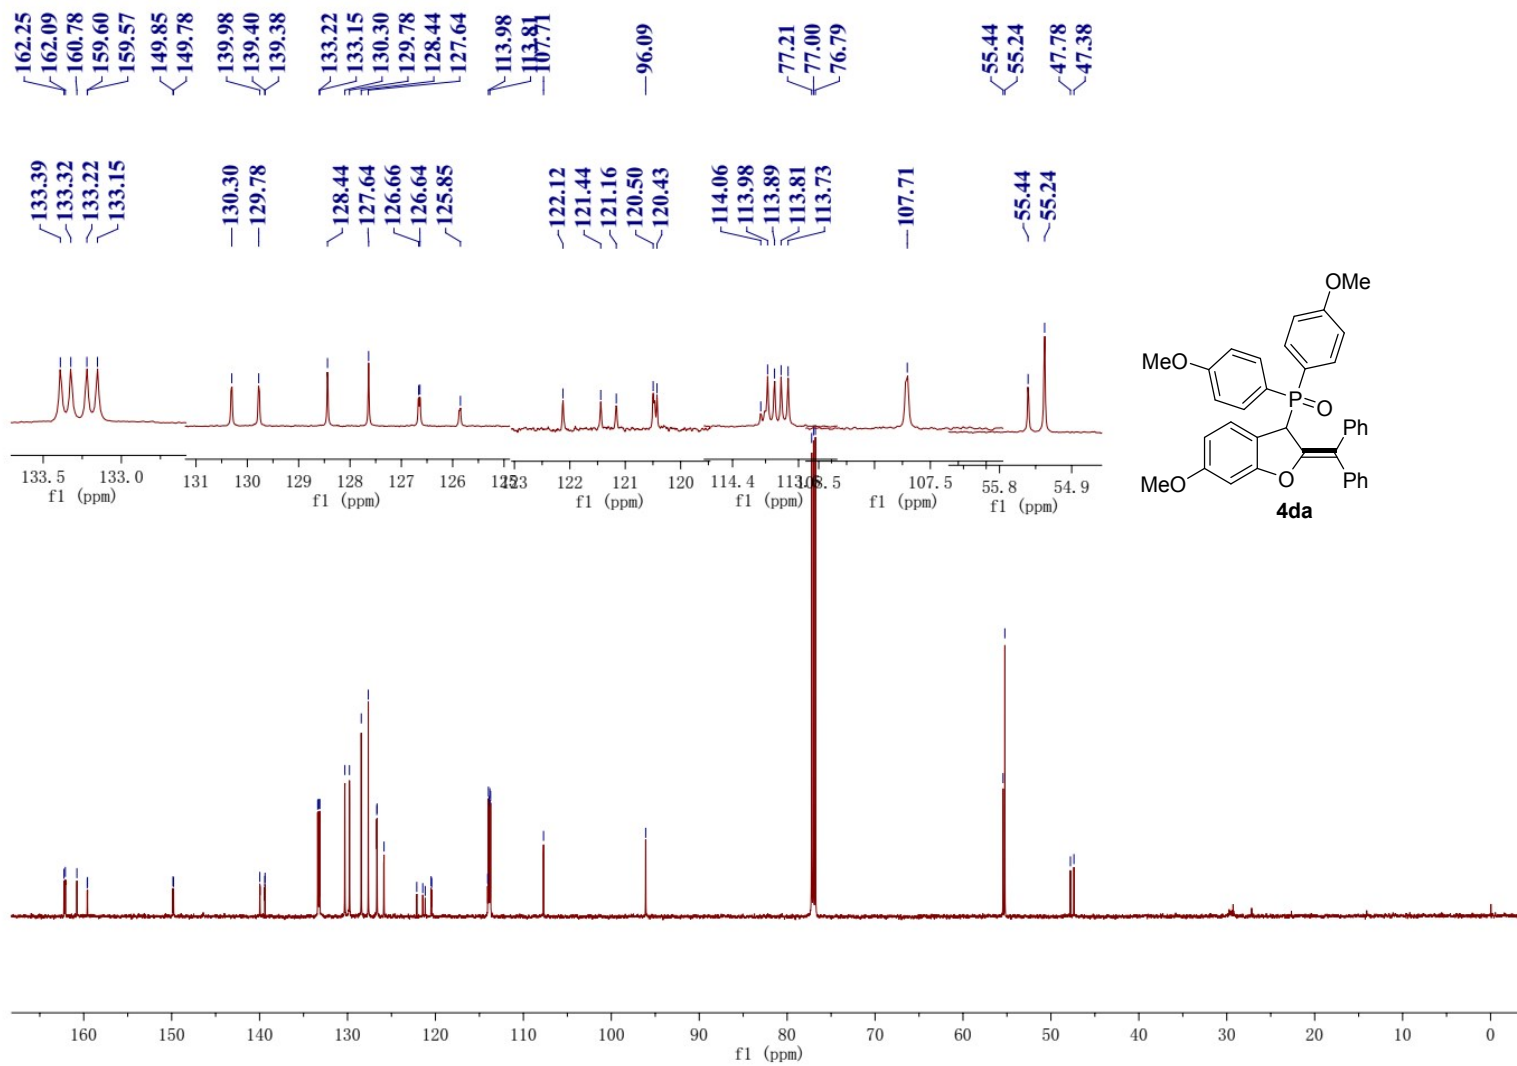

—28.89

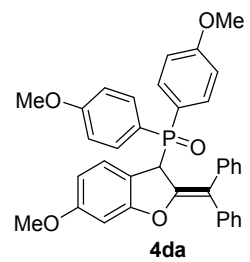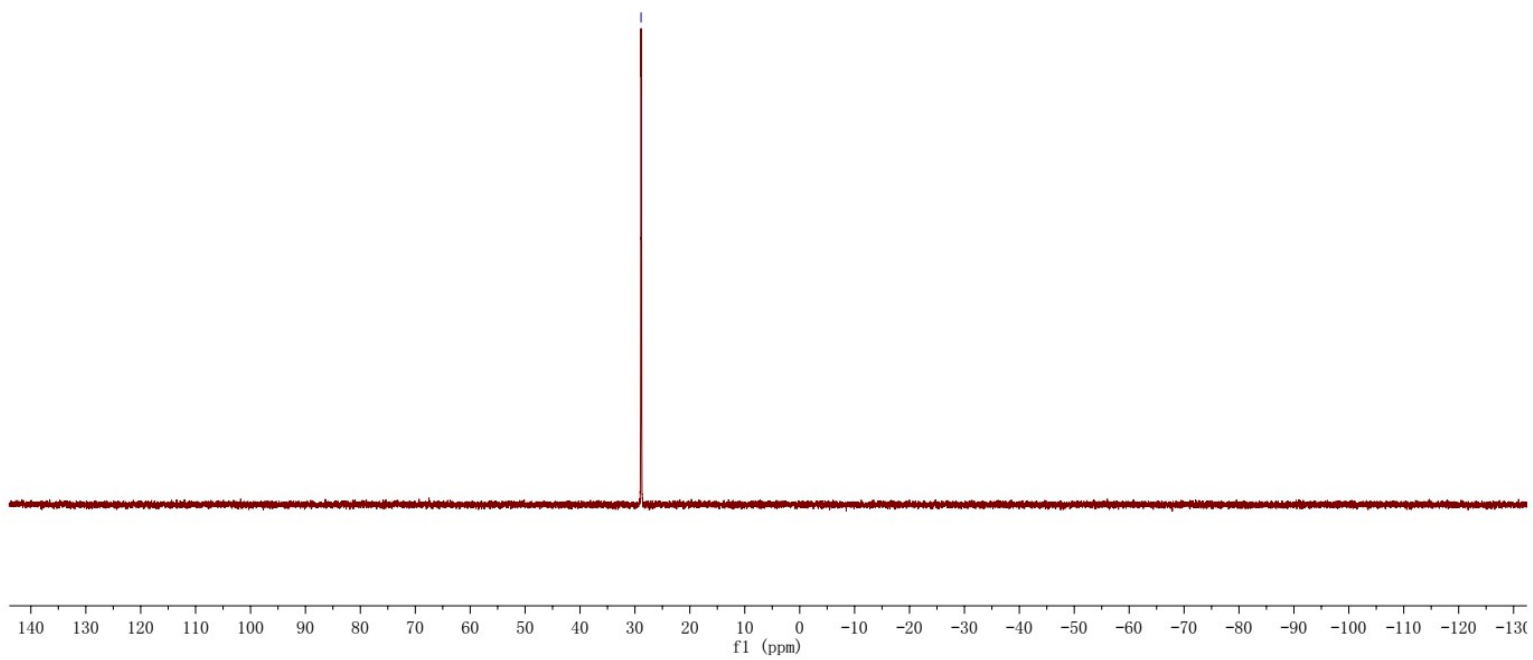

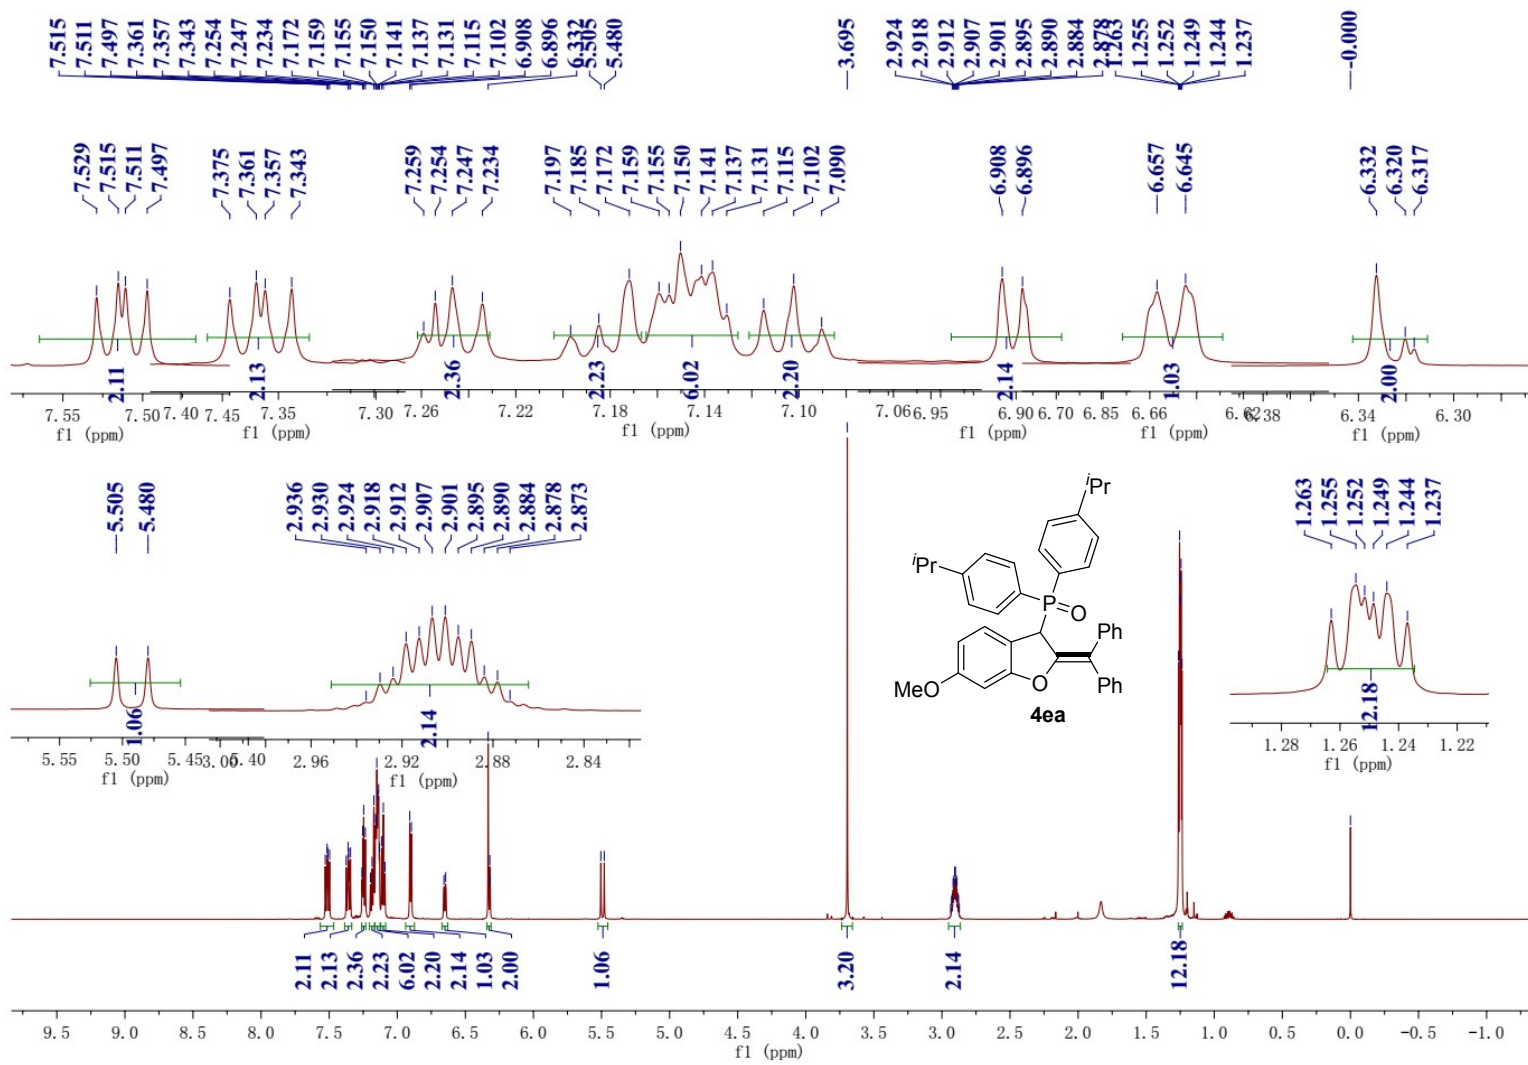

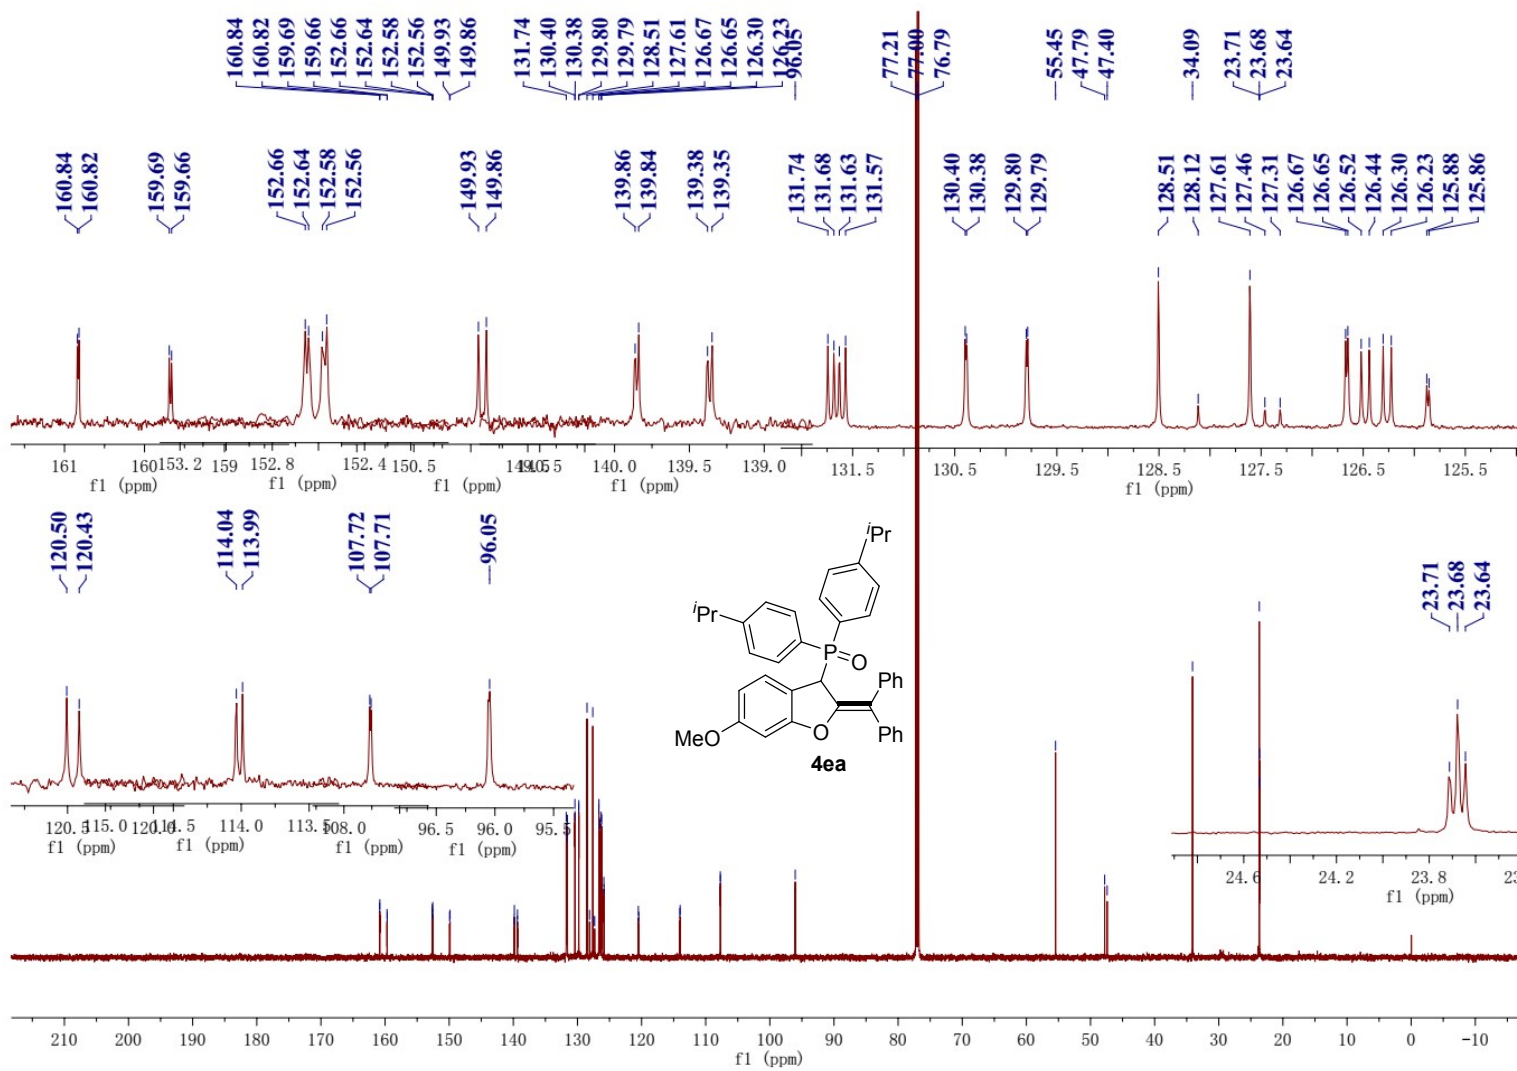

—29.22

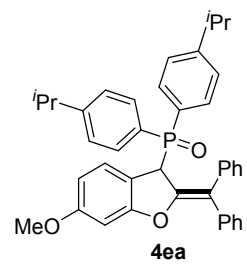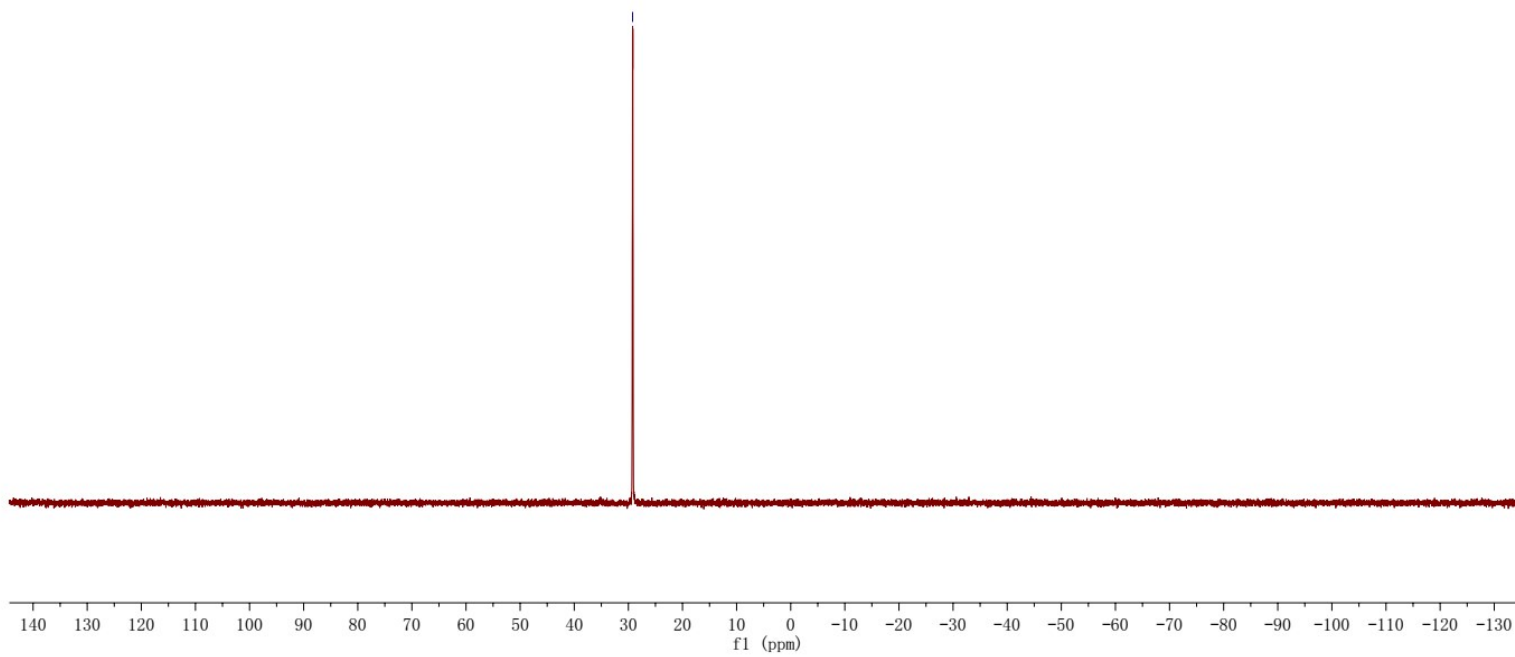

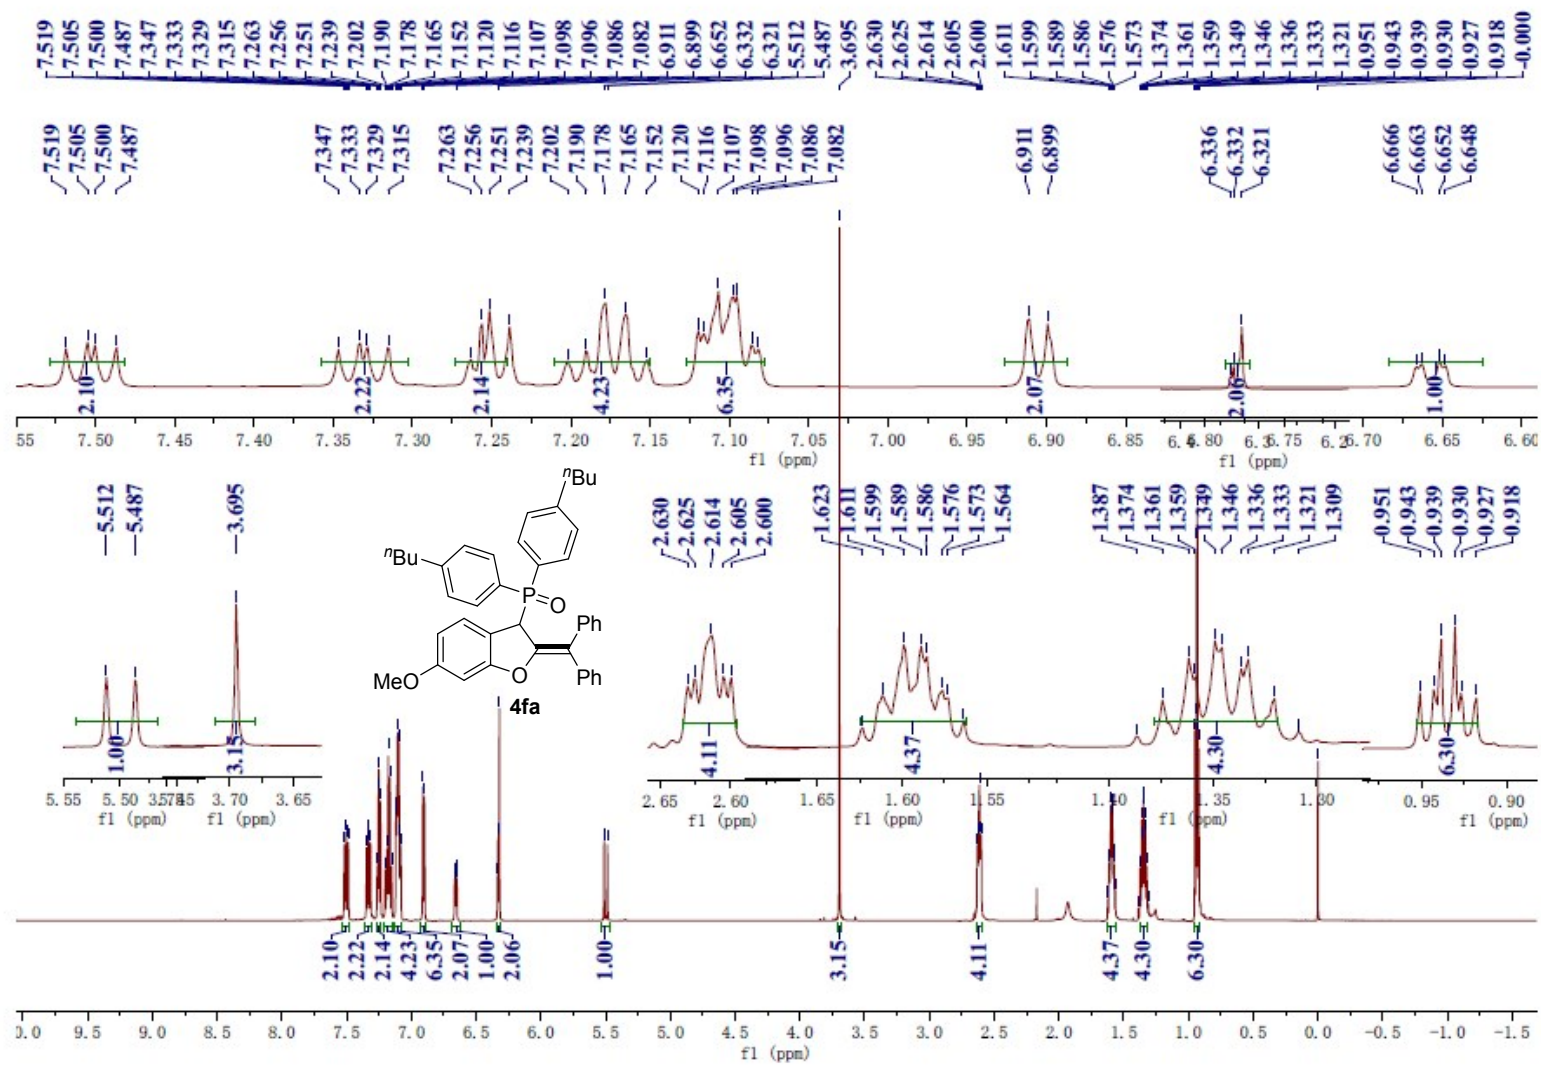

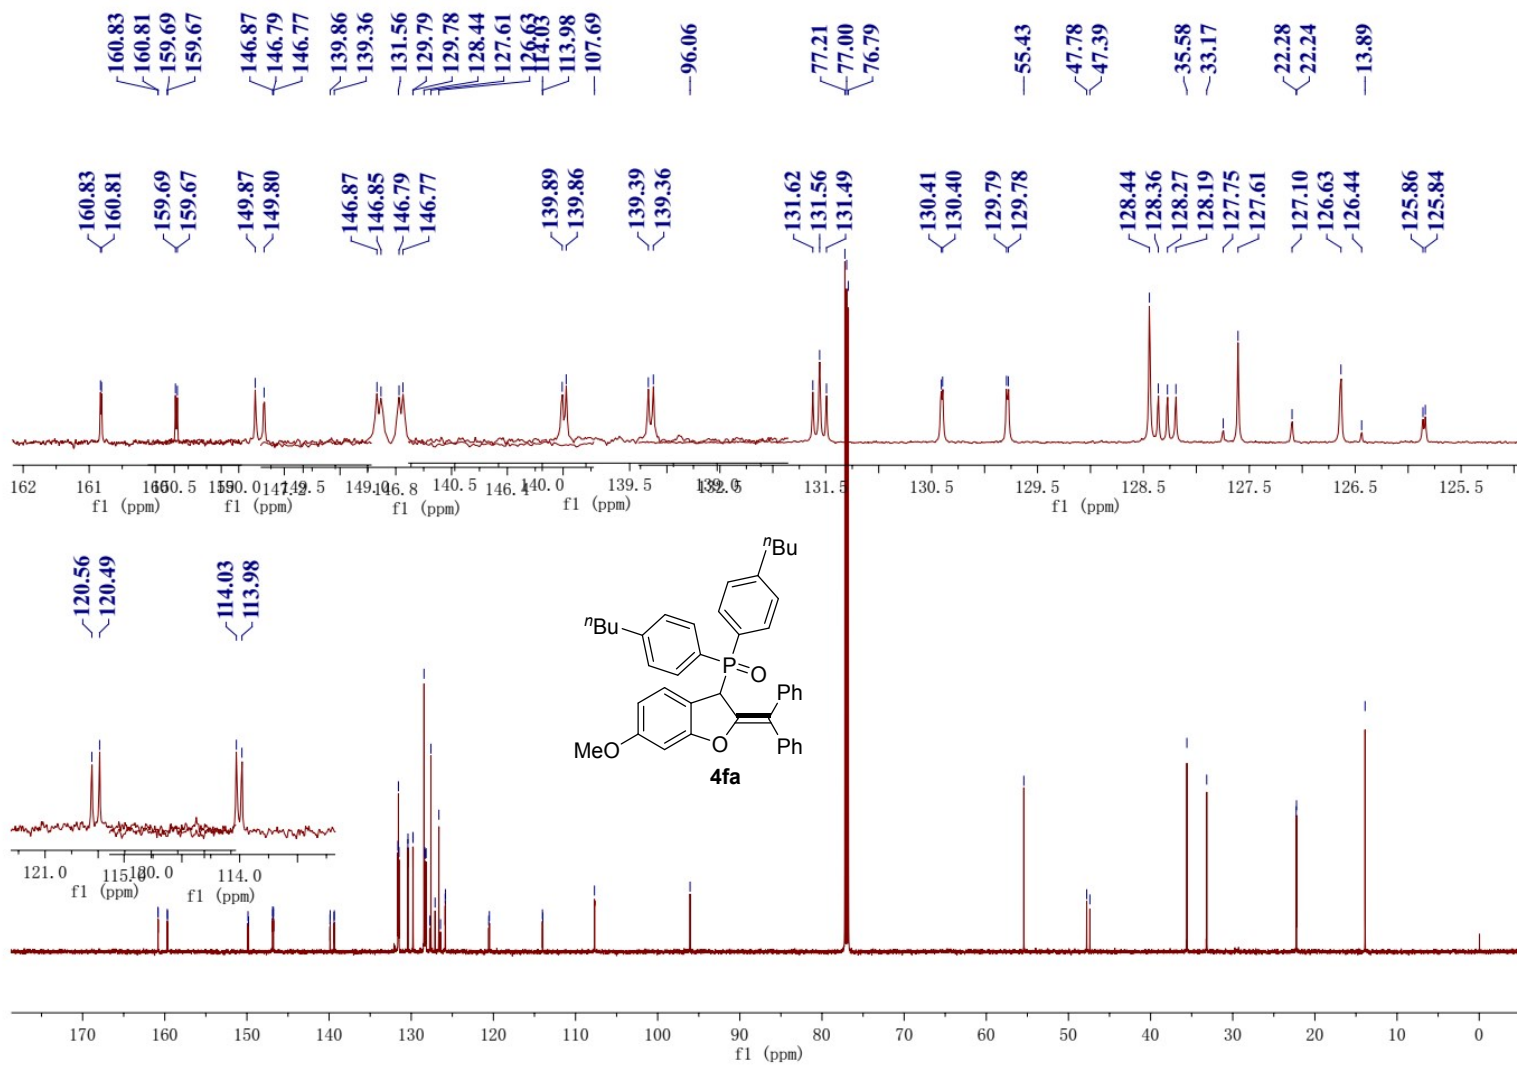



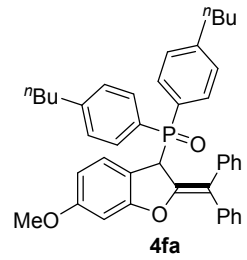

30.11

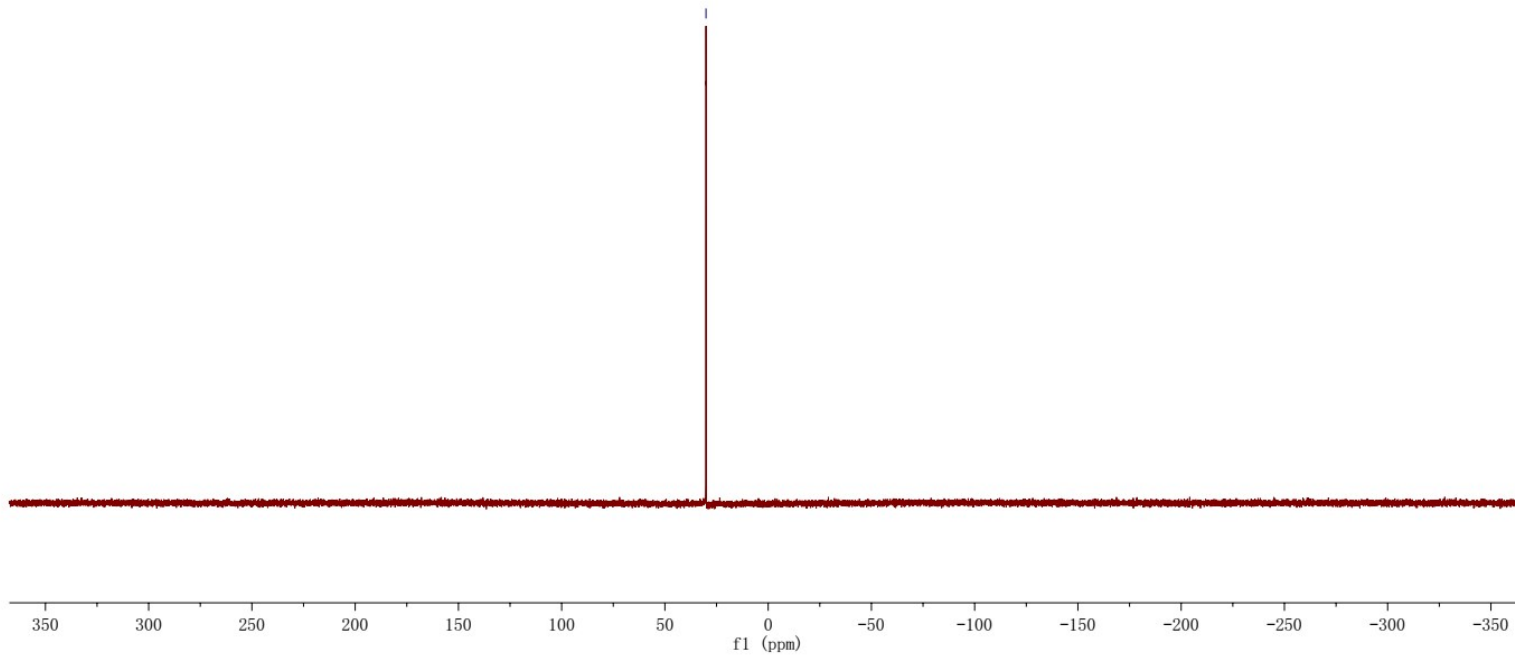



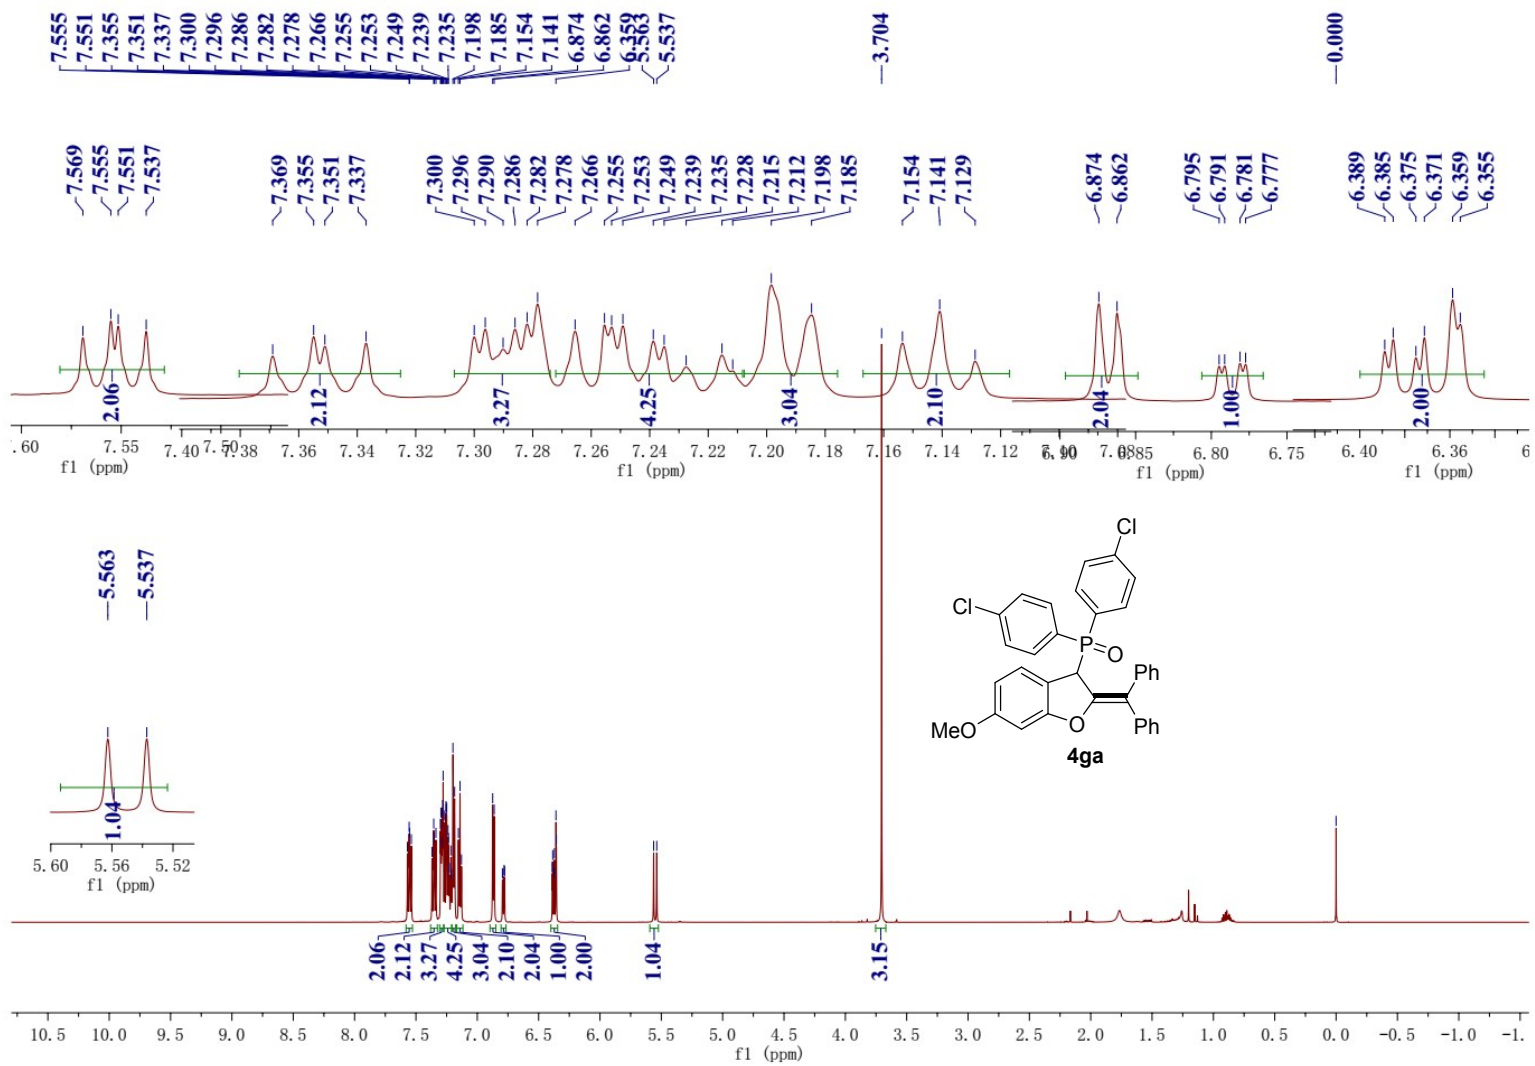

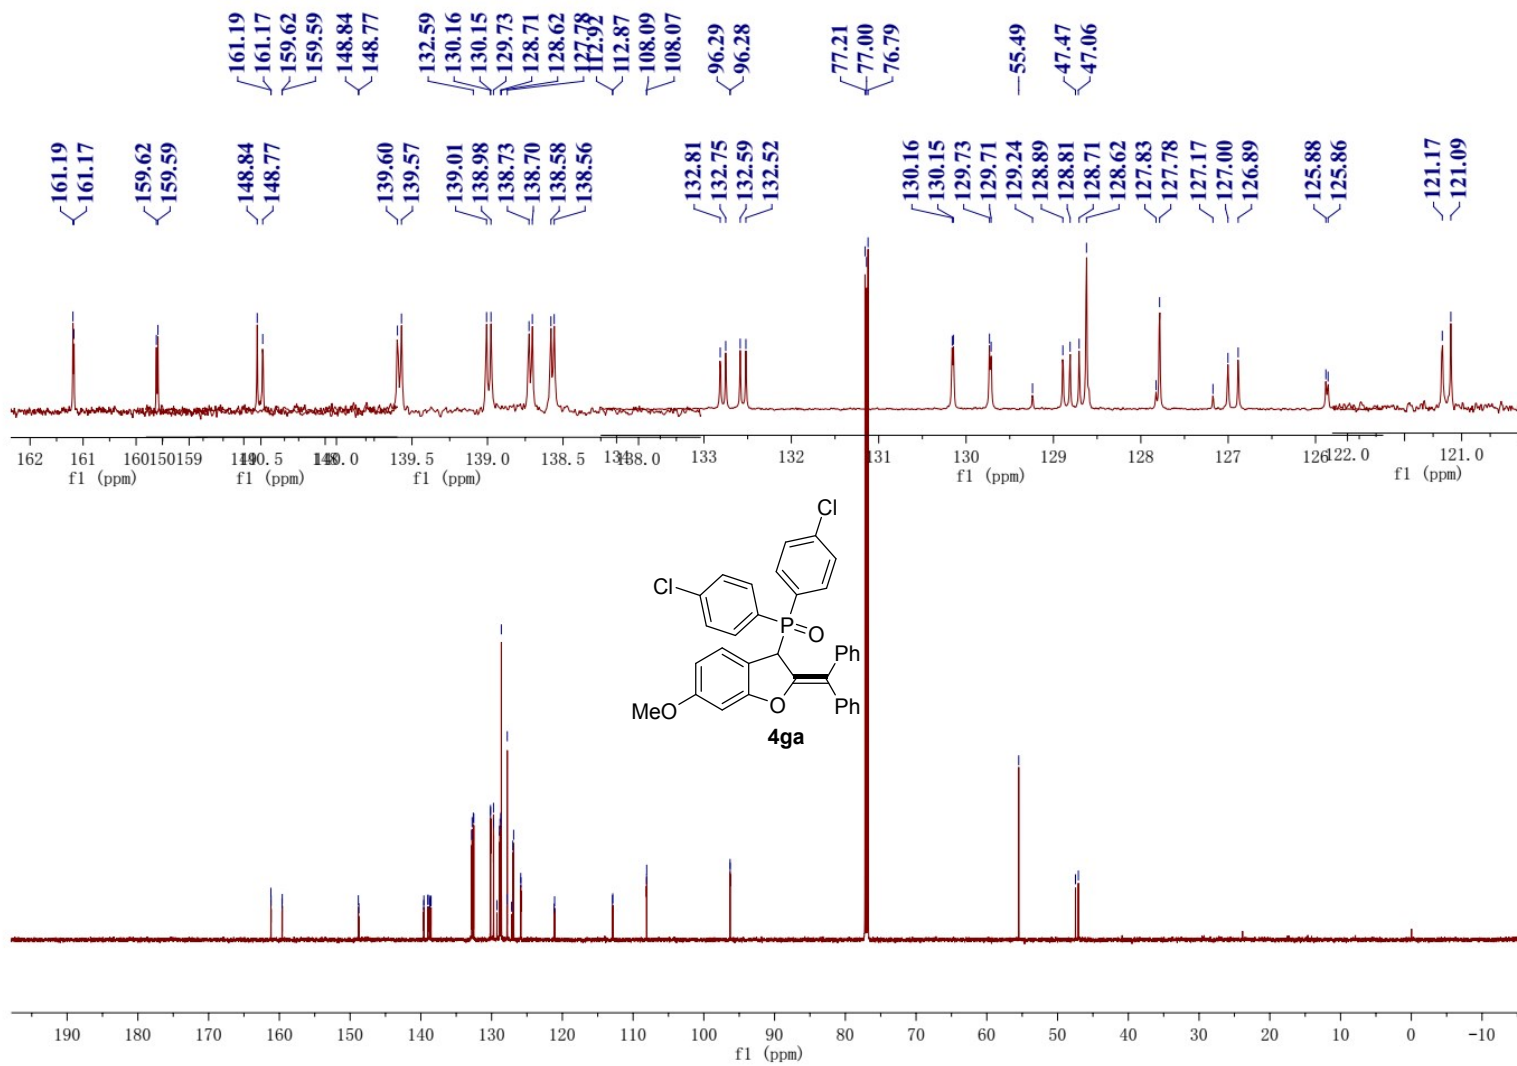



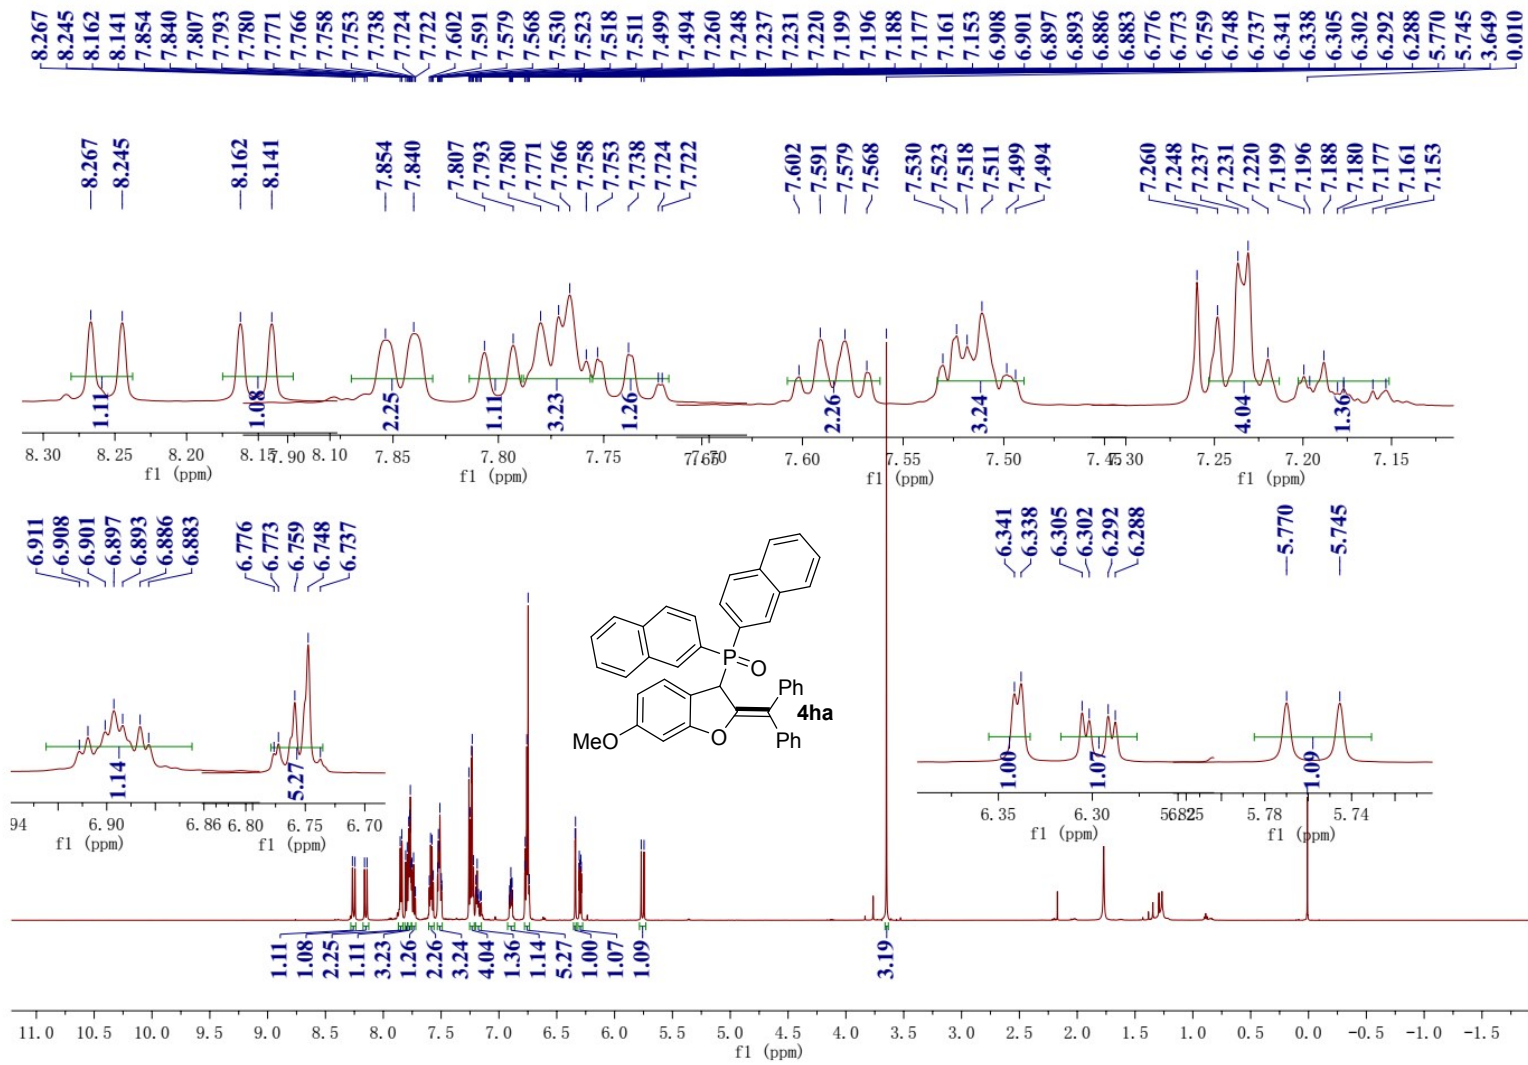

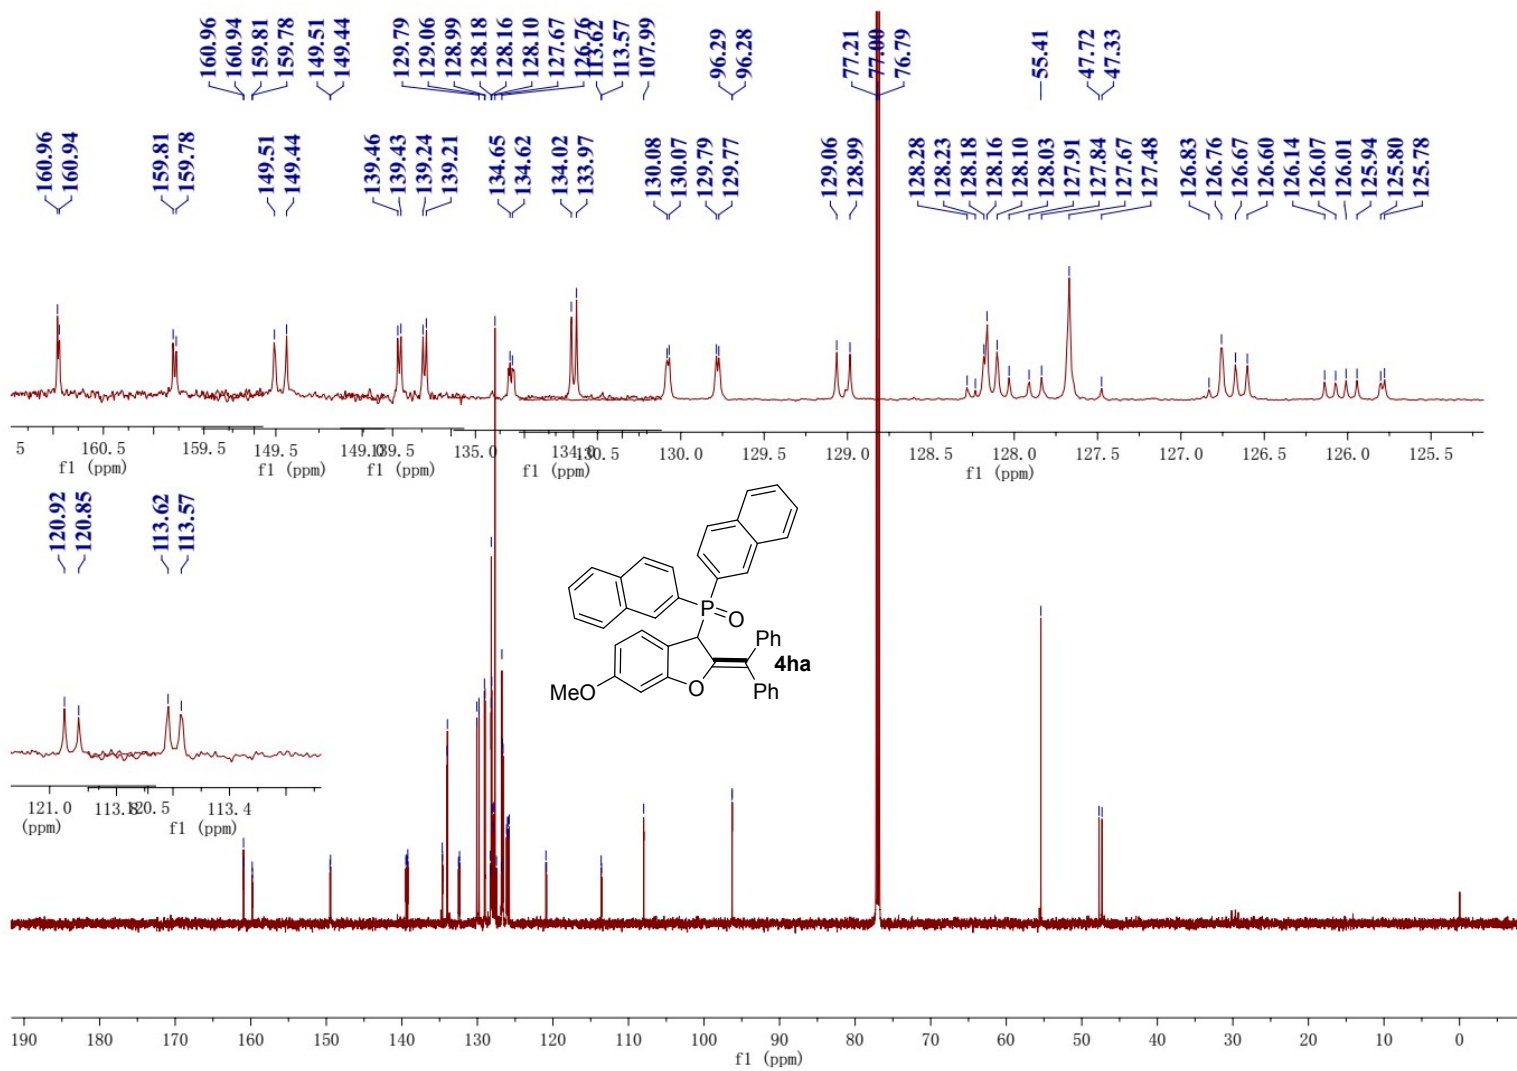

—29.14

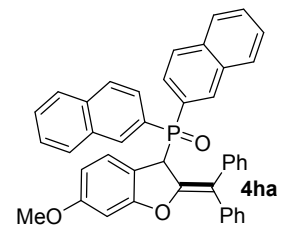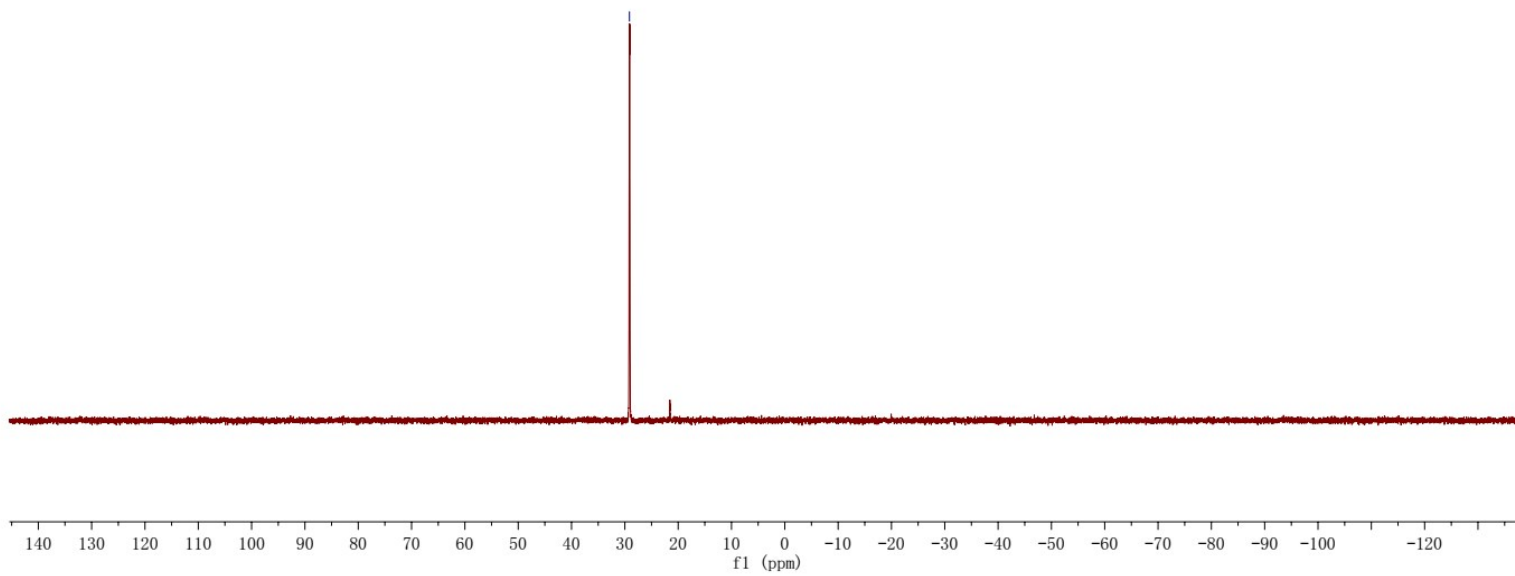

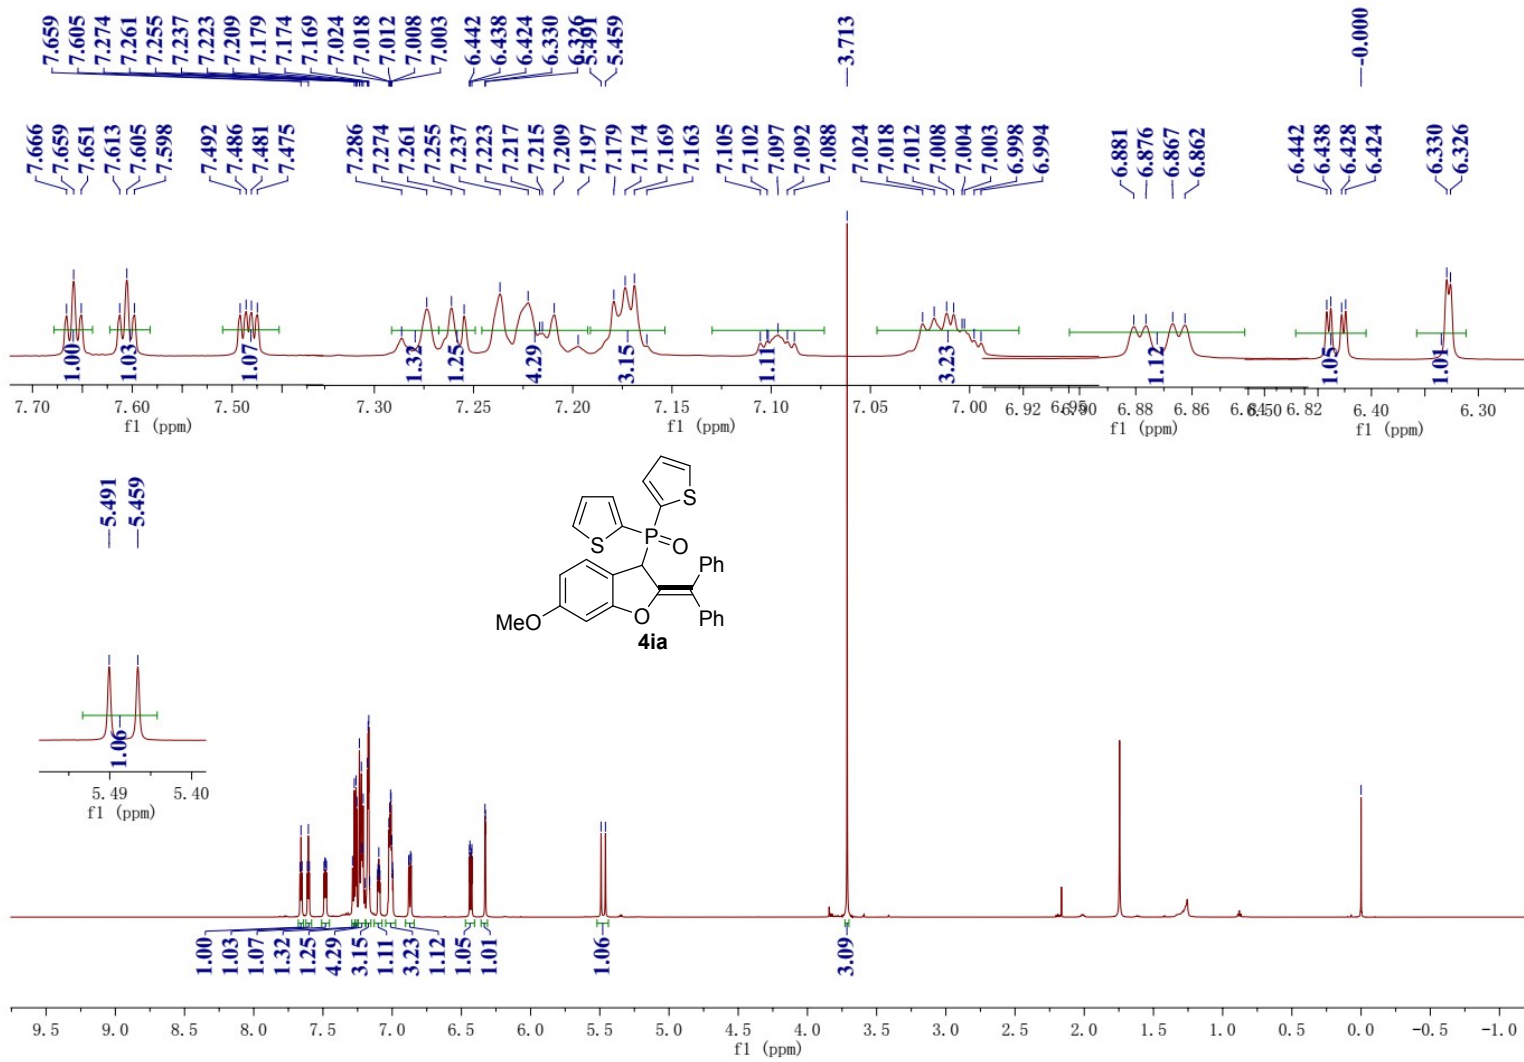



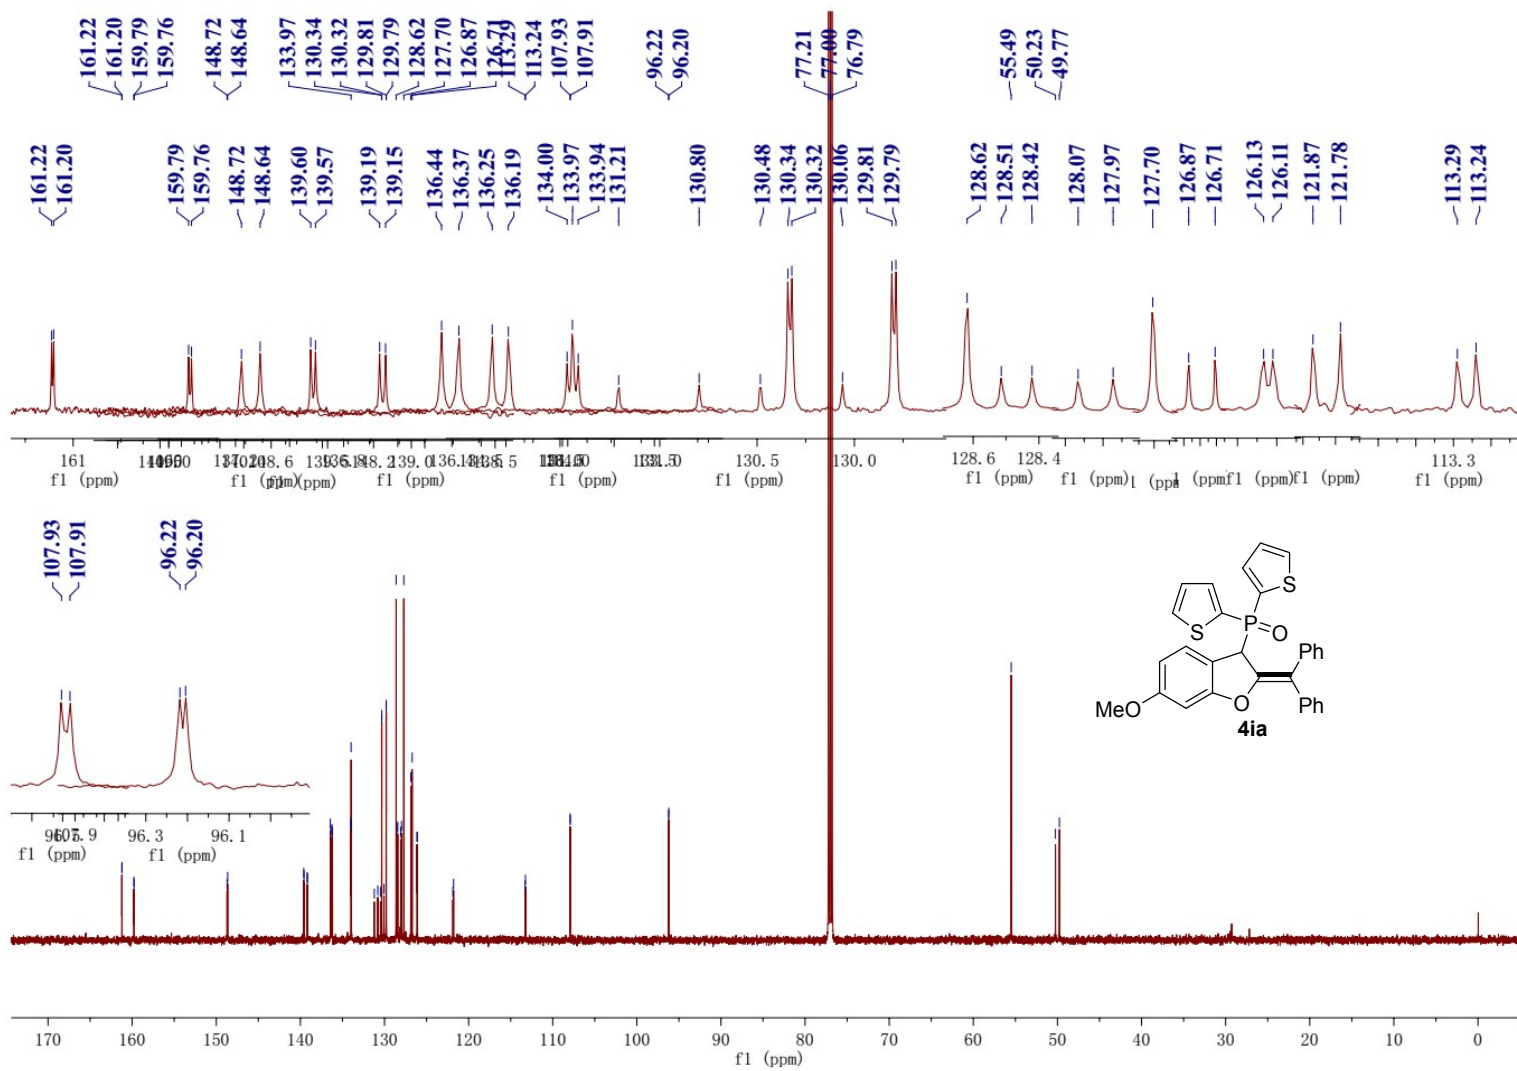



—18.86

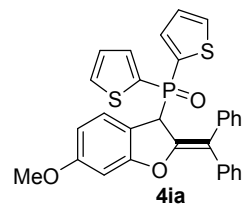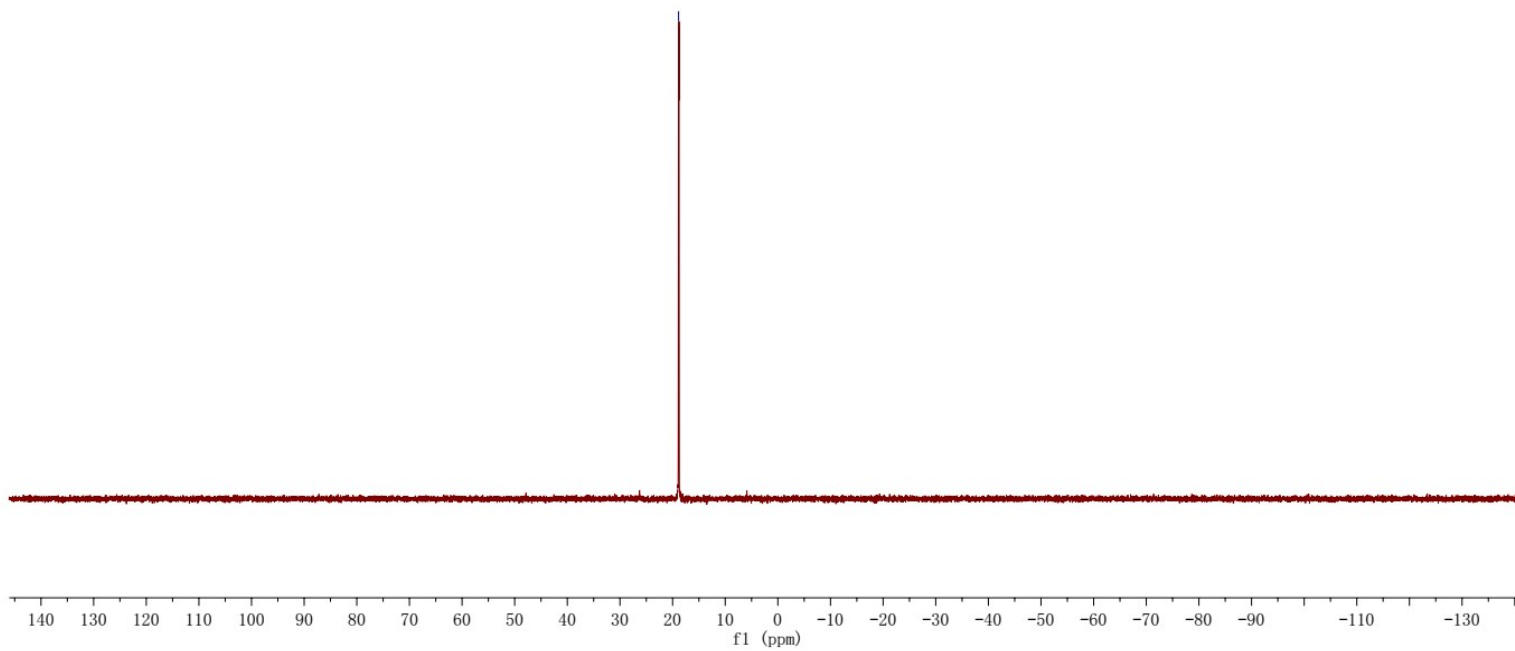



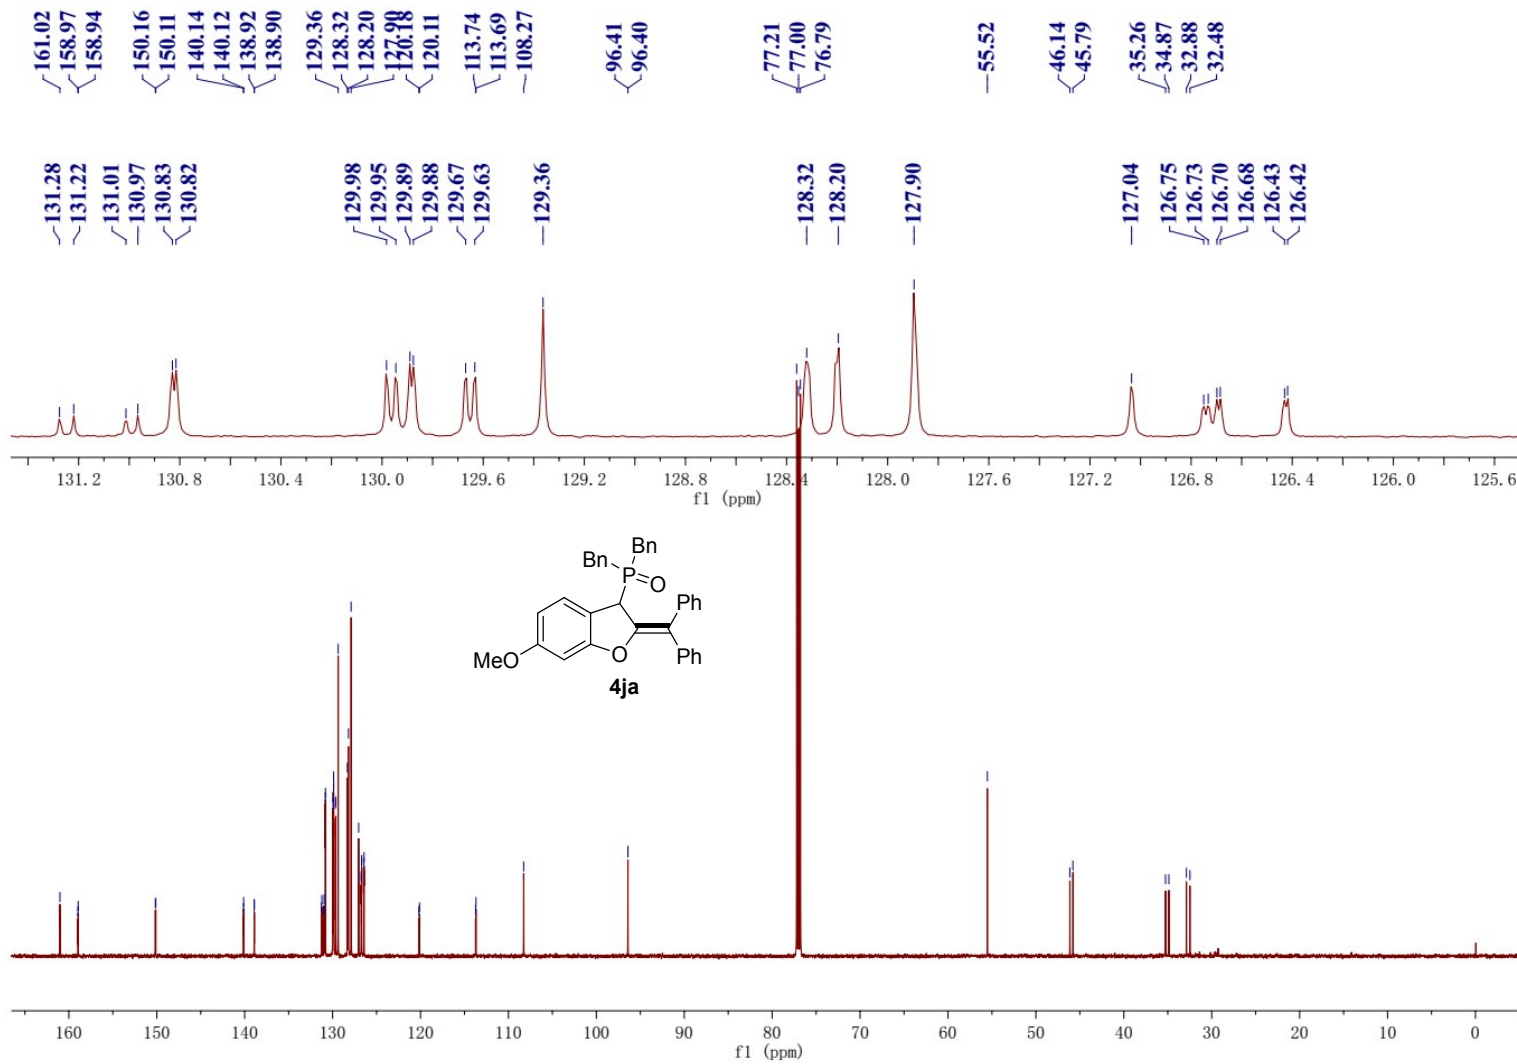

—42.33

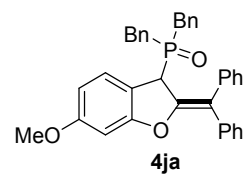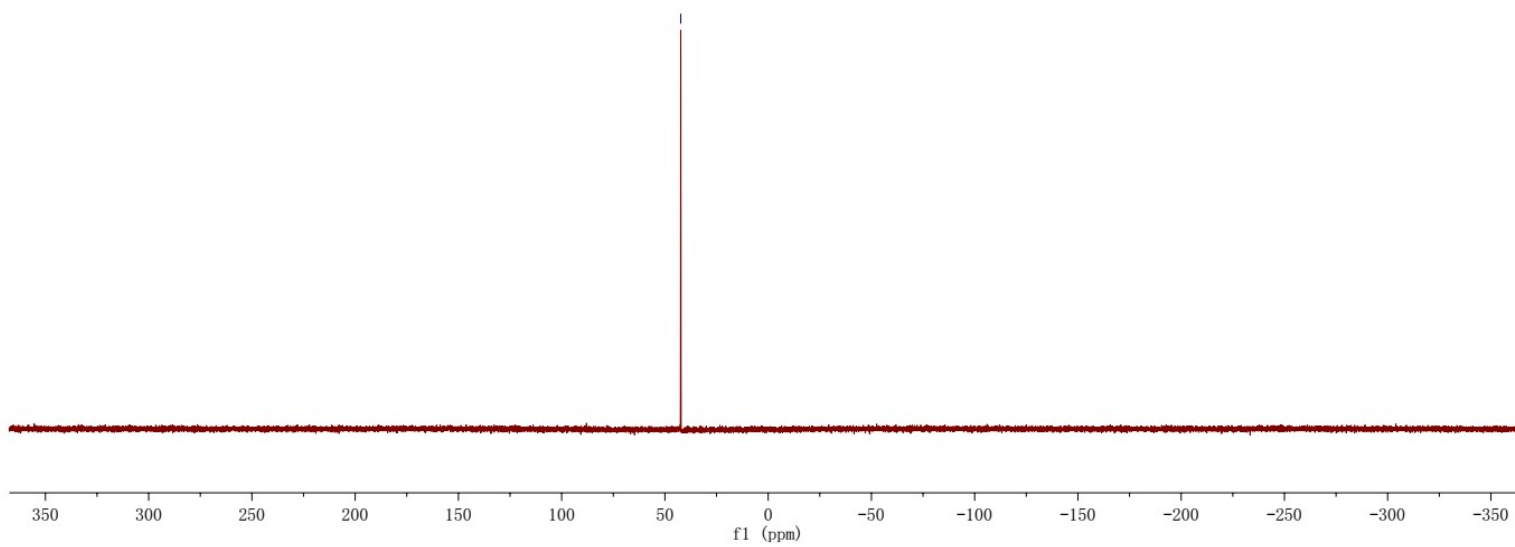

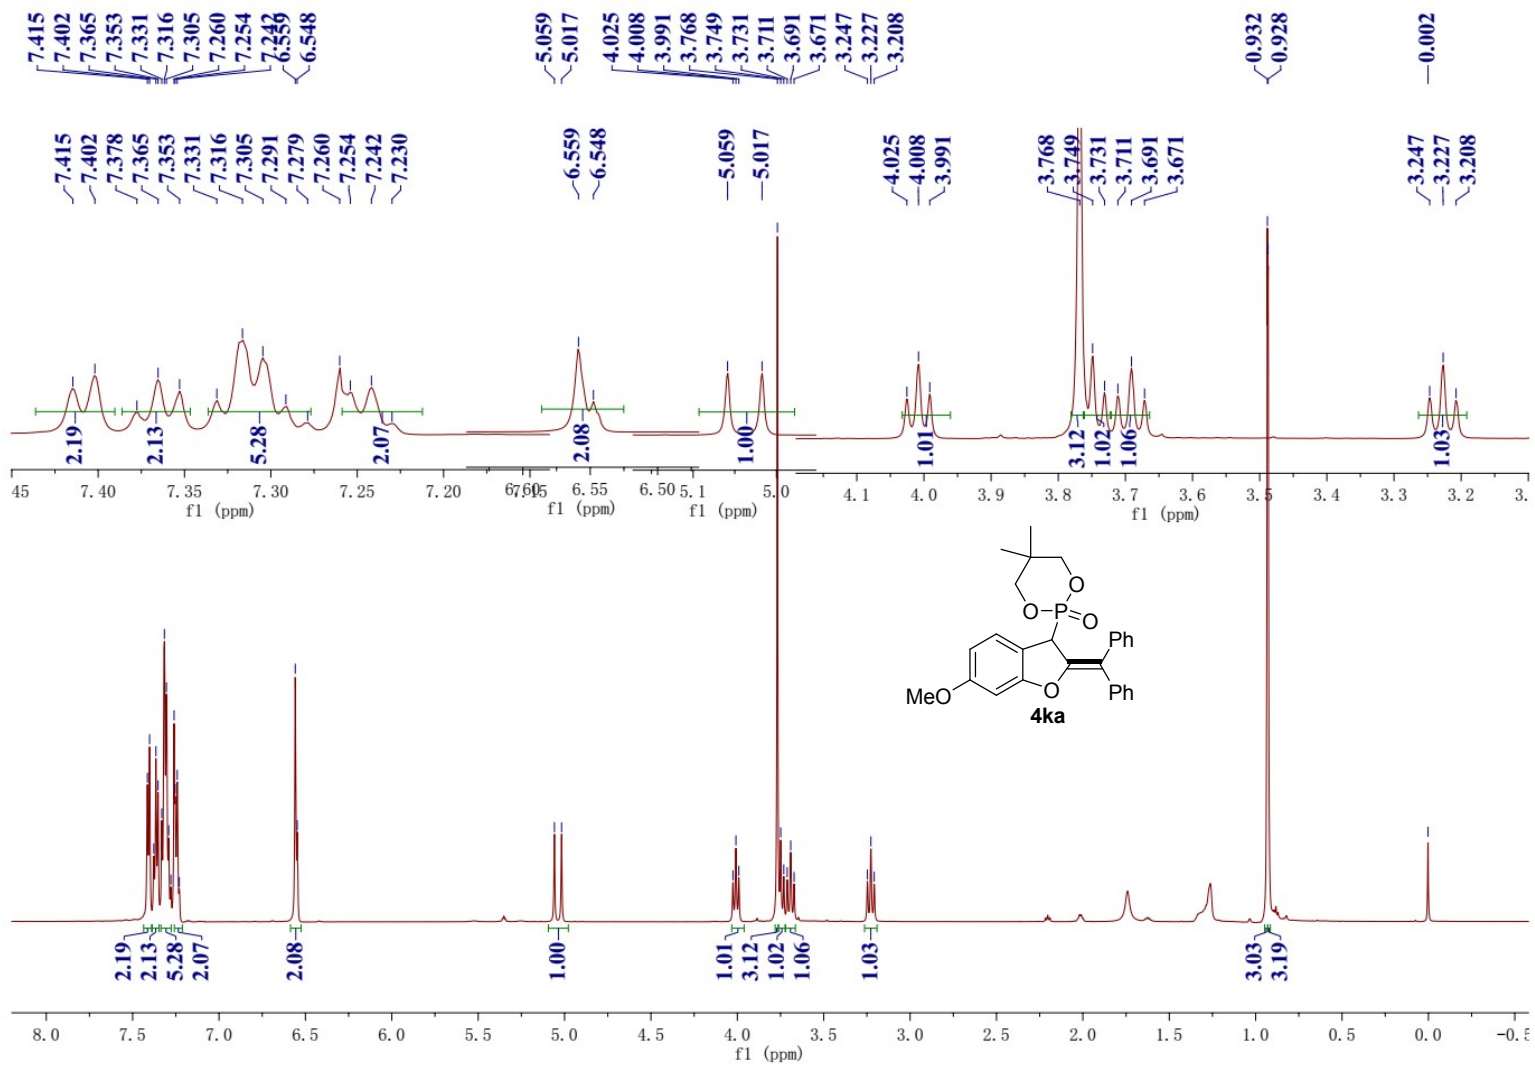

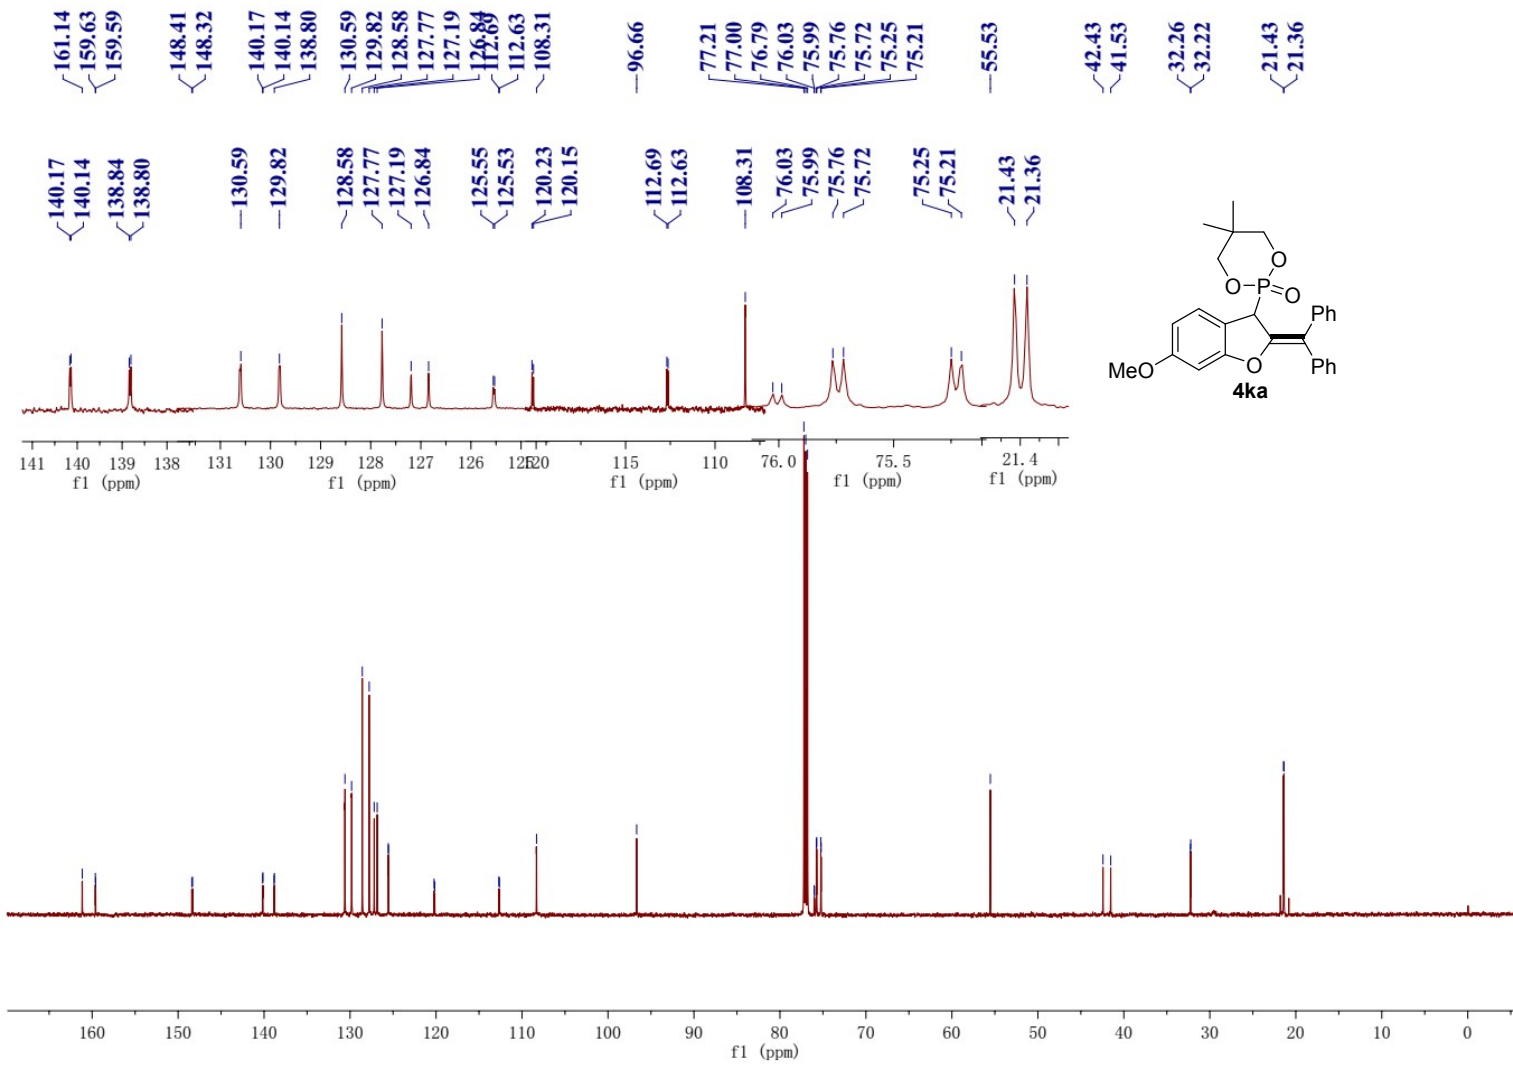

-15.56

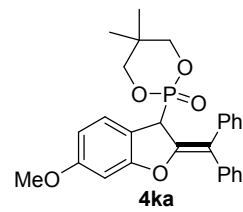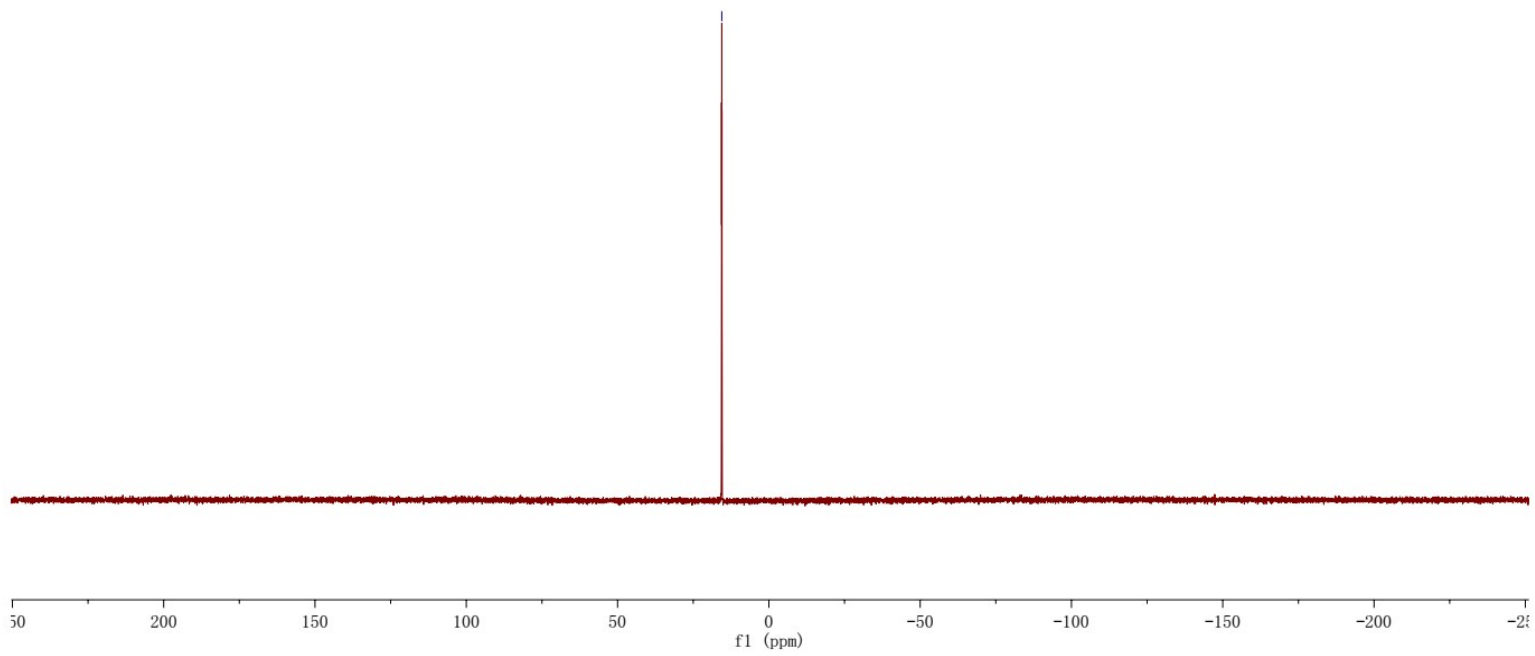

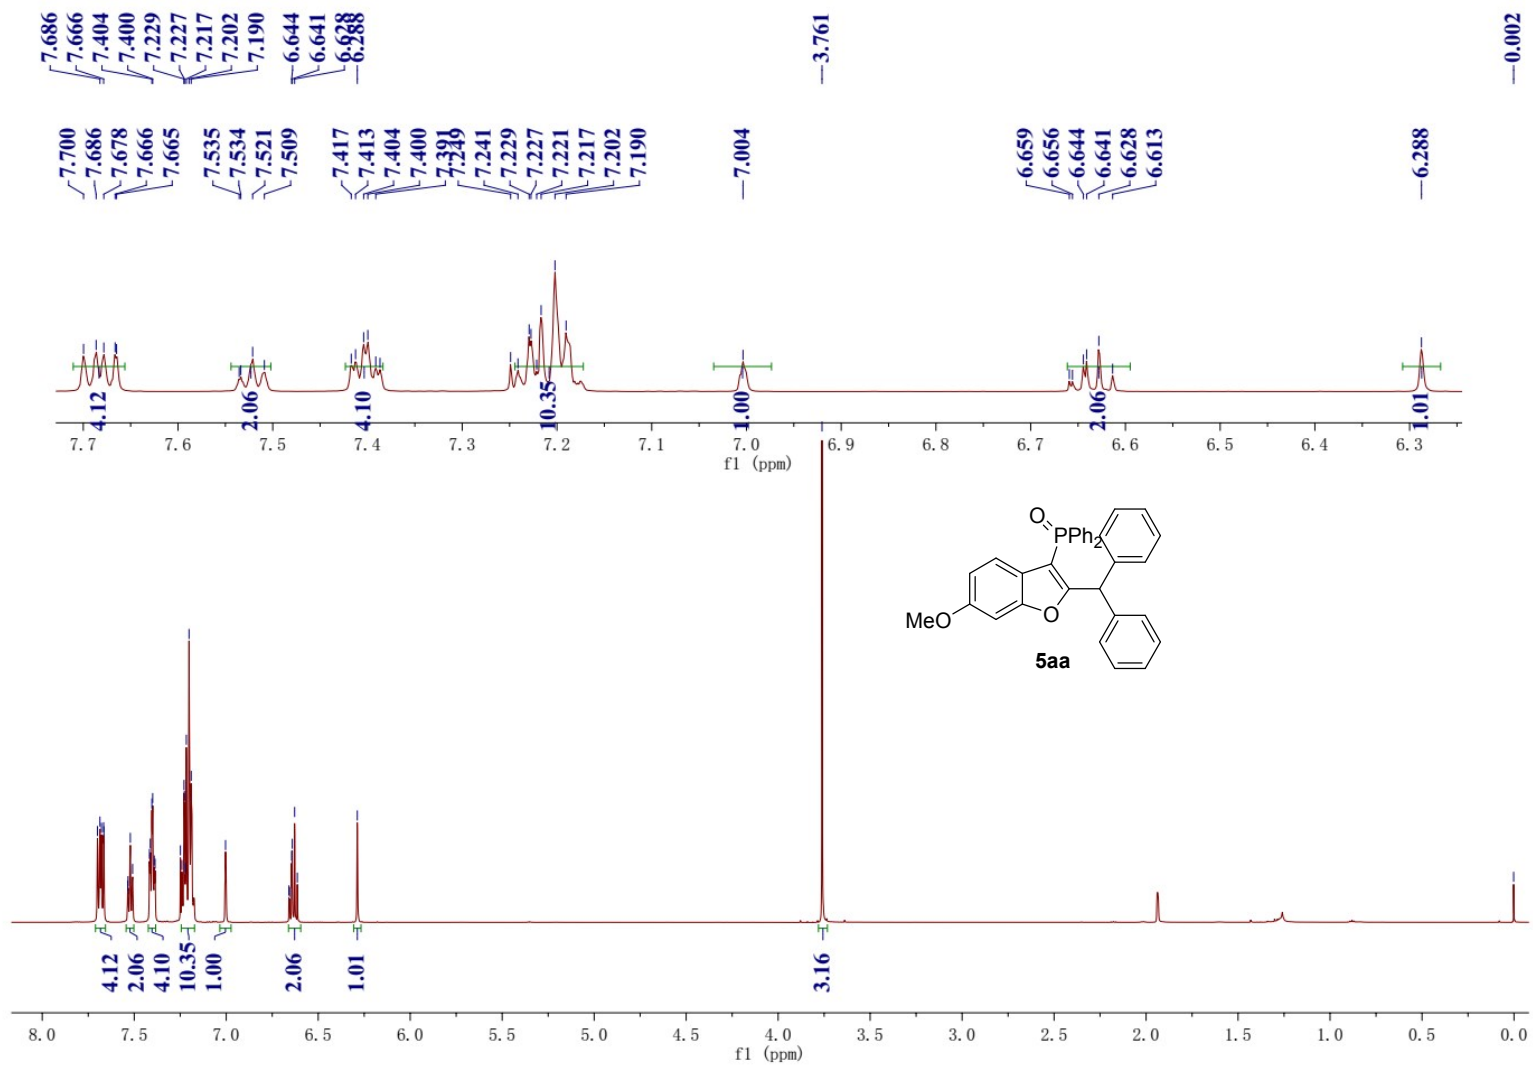





— 22.05

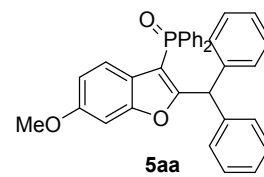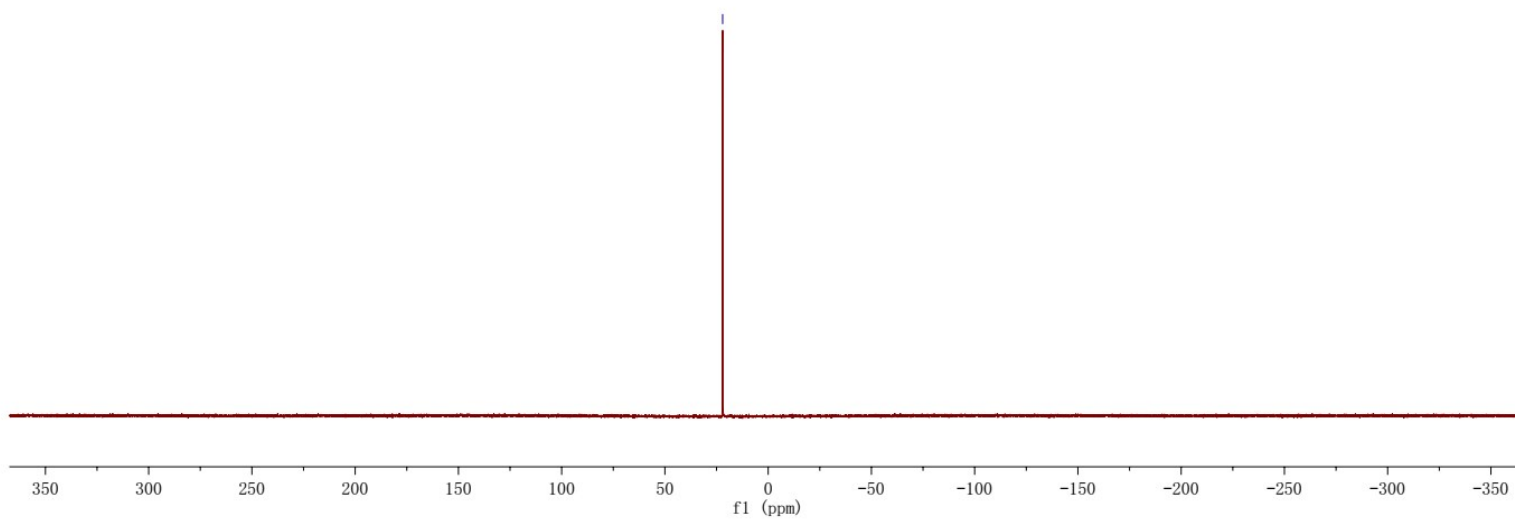

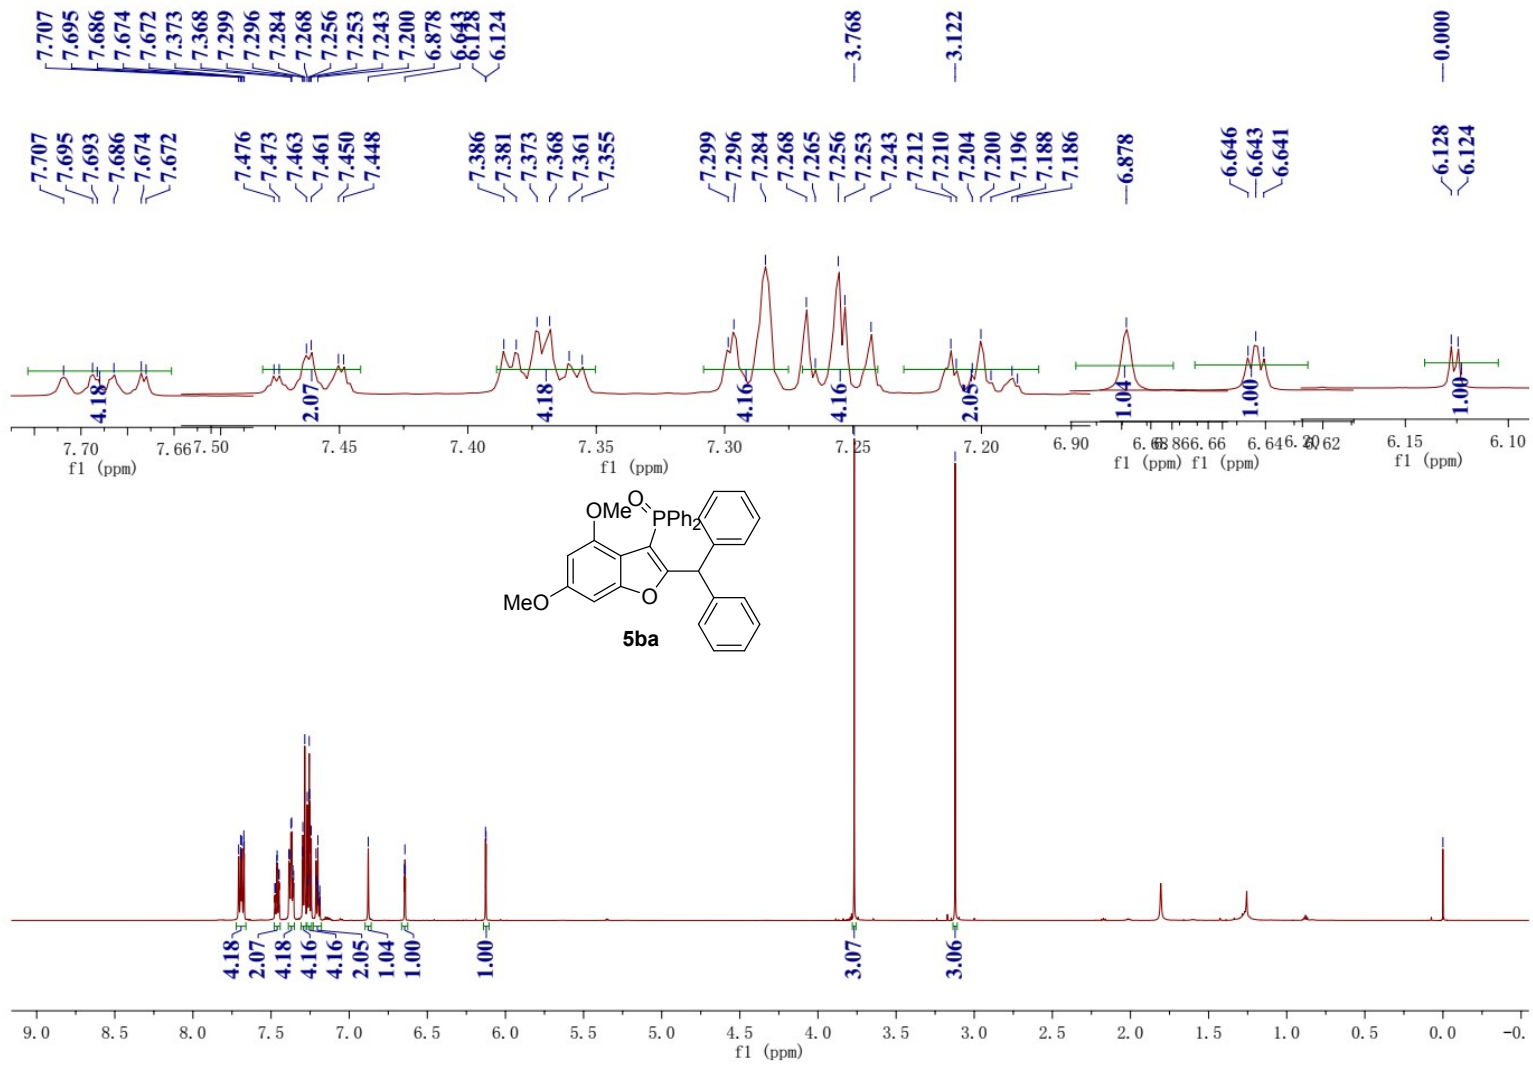

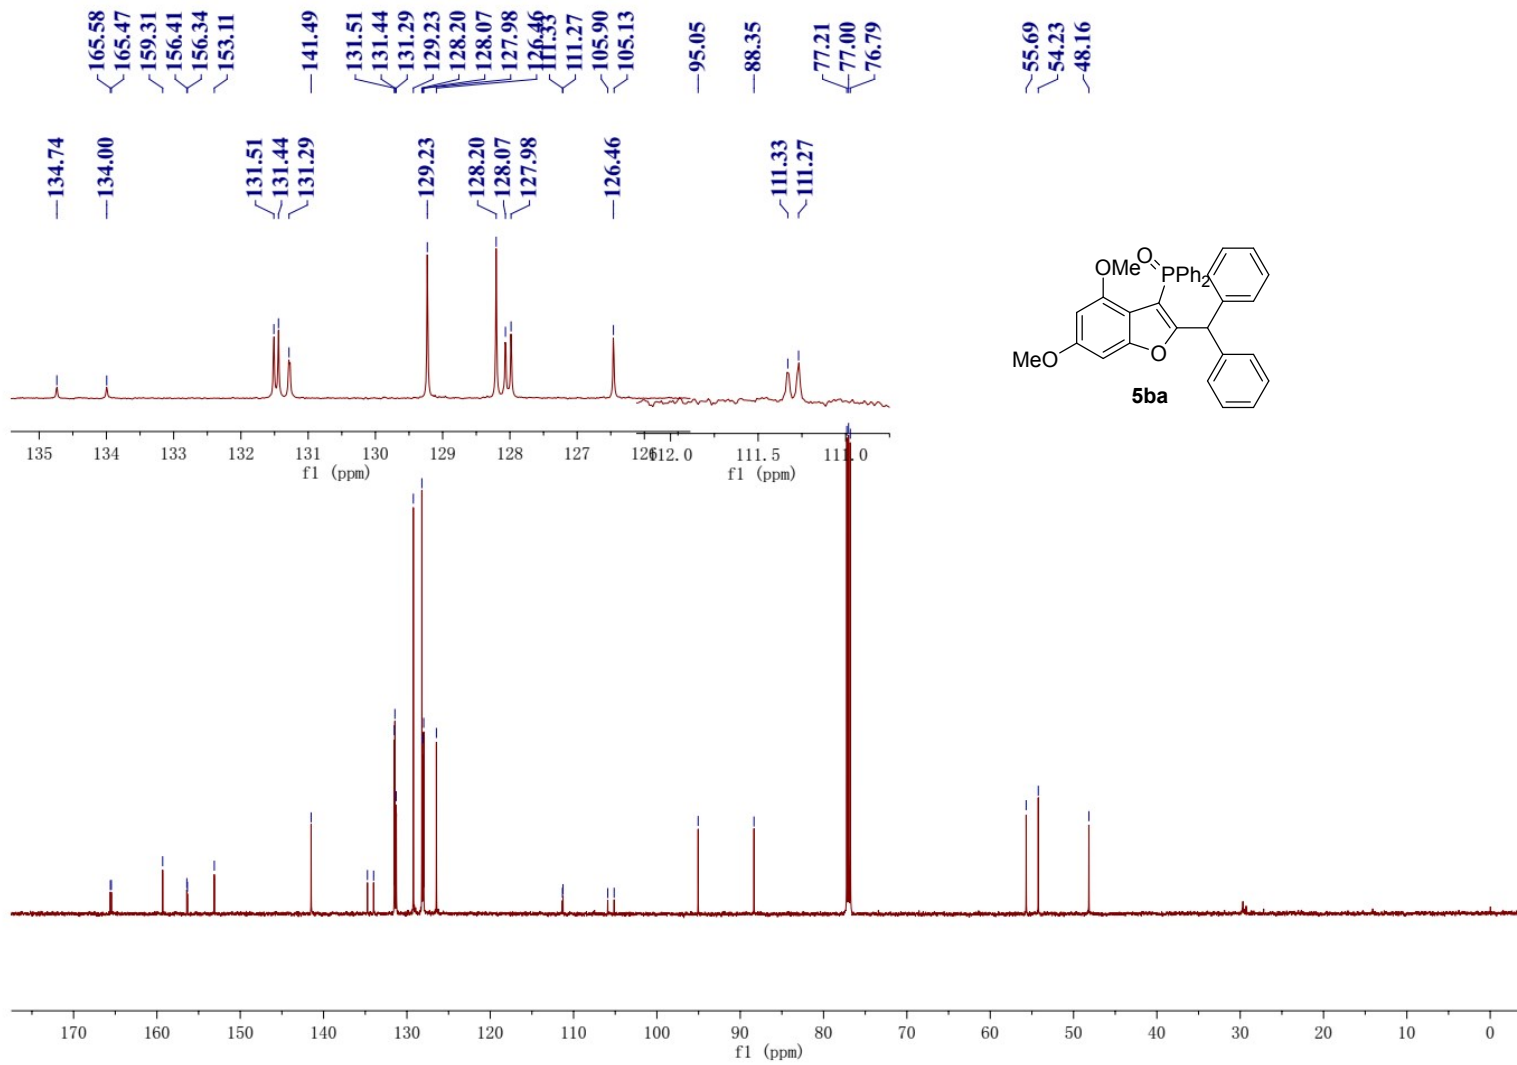

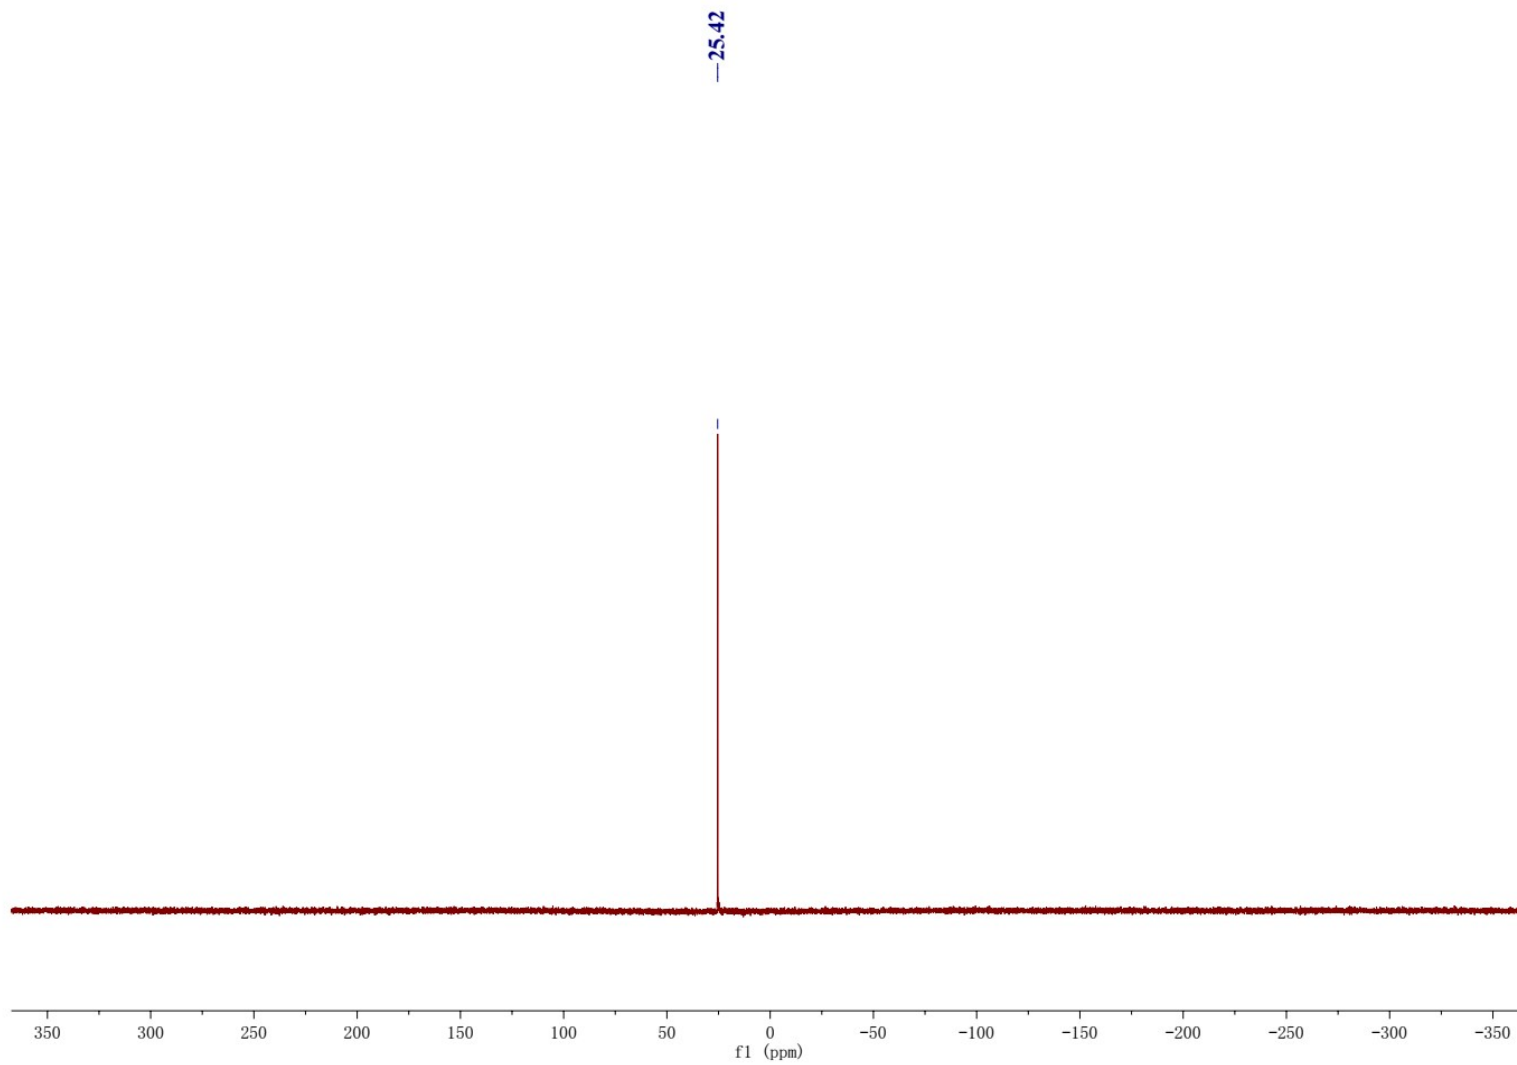

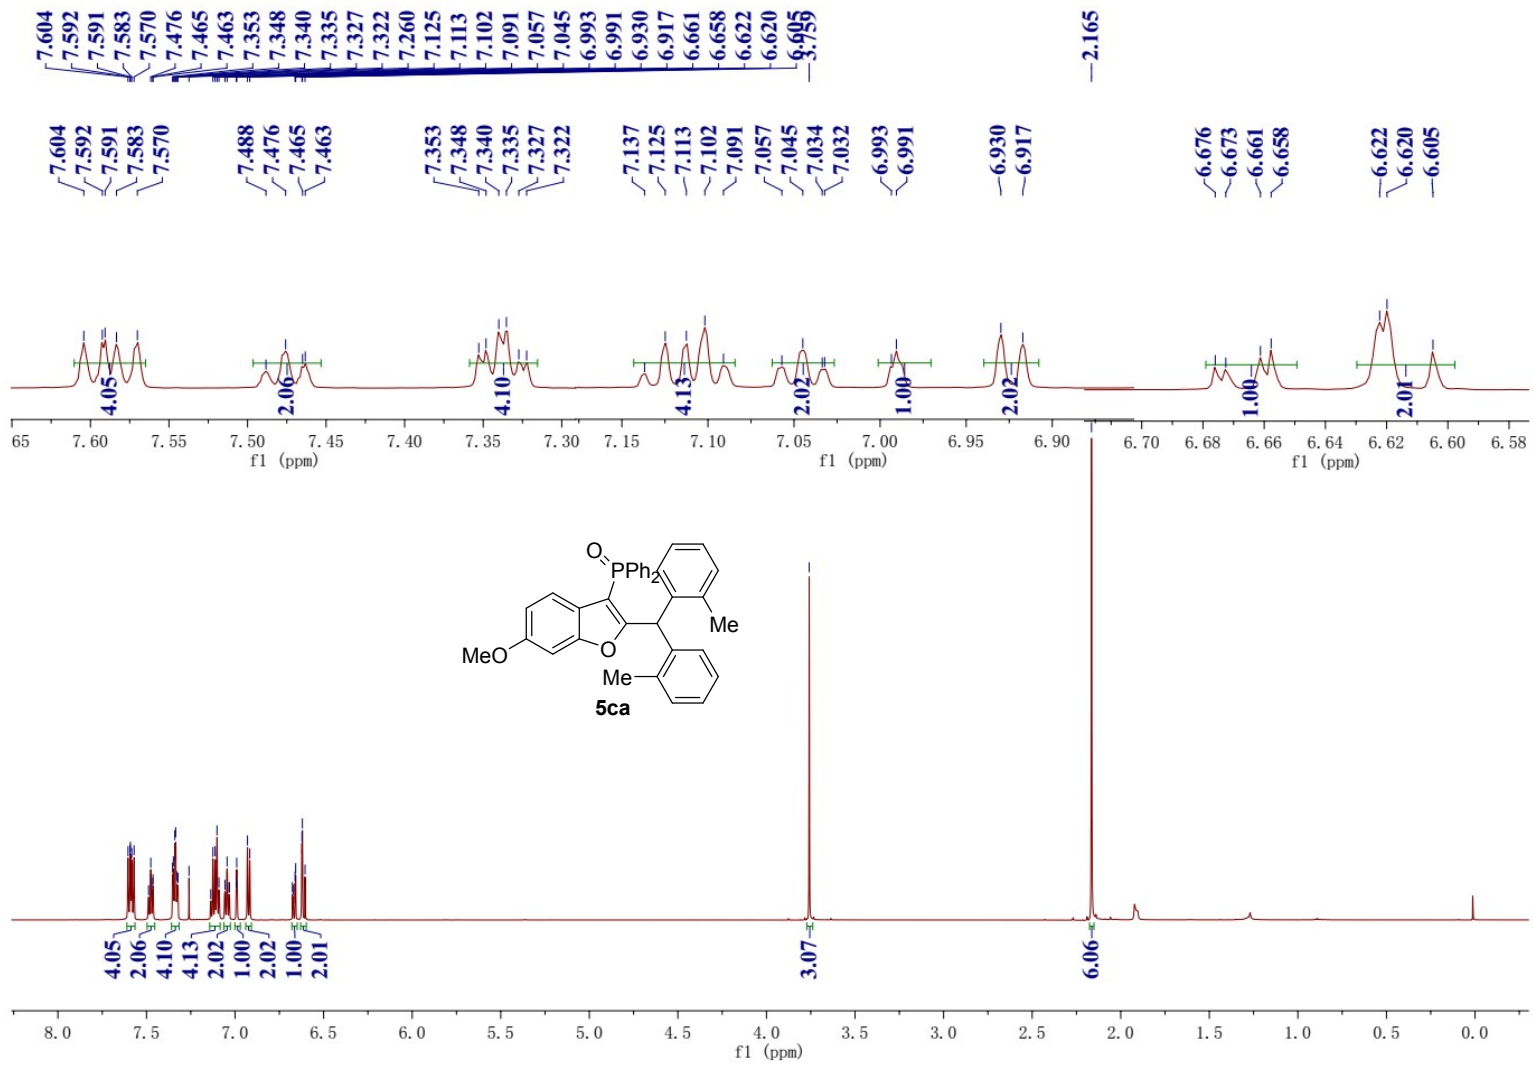

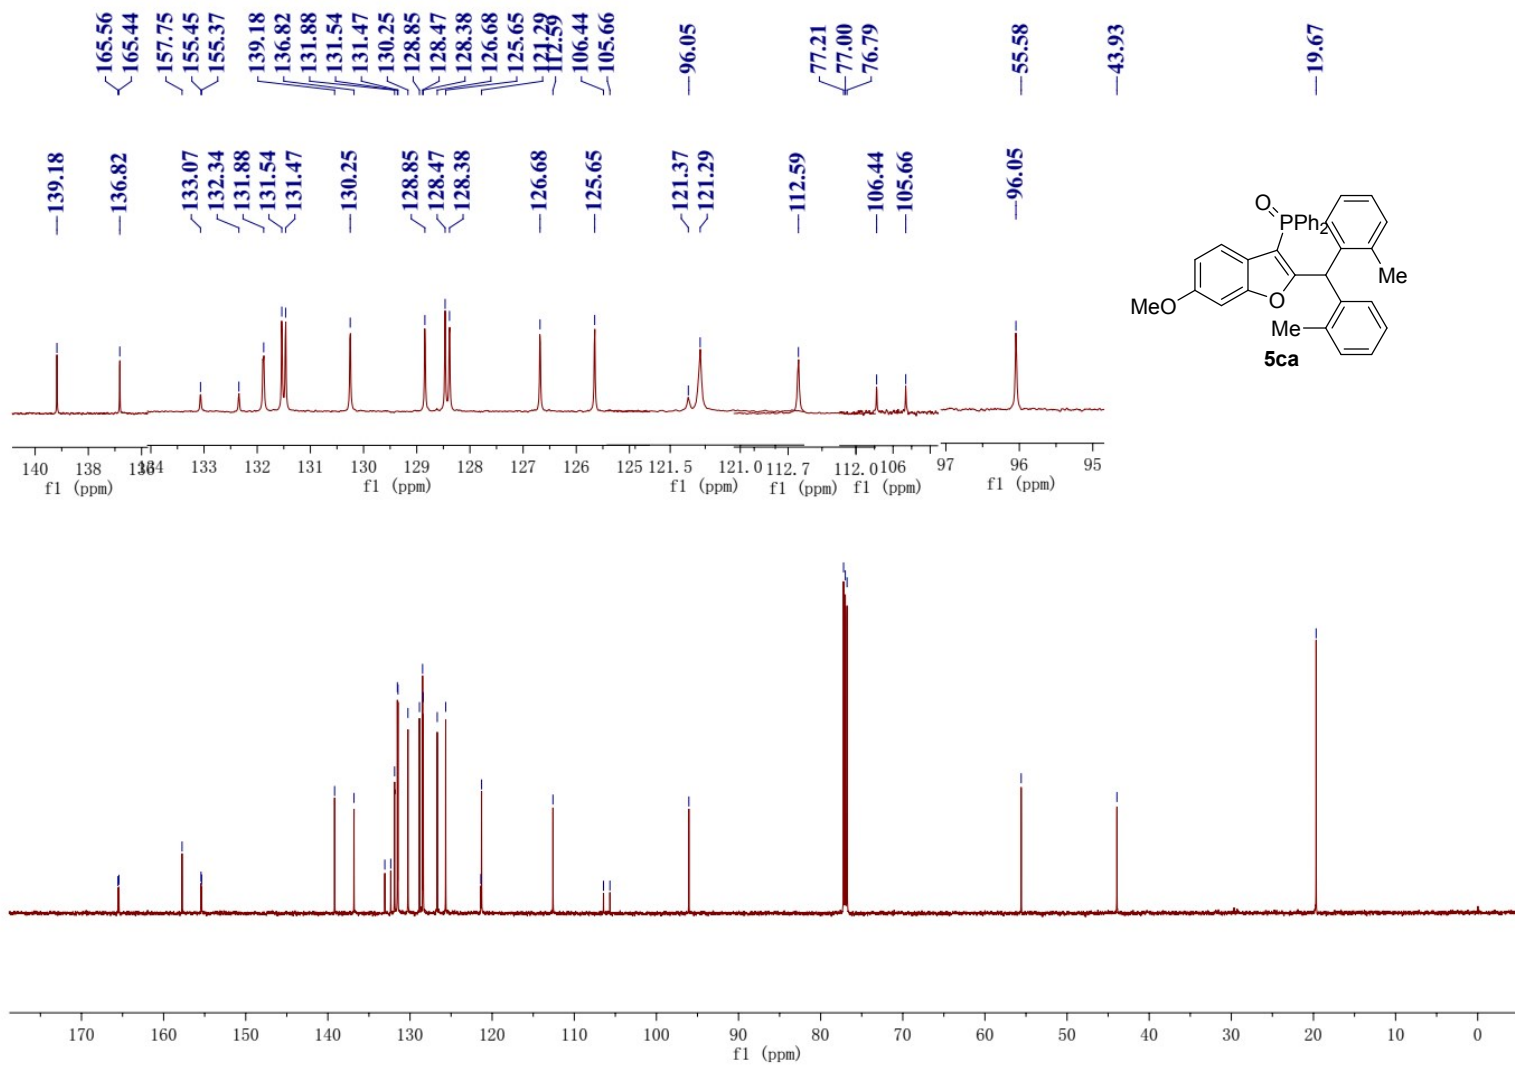

—21.20

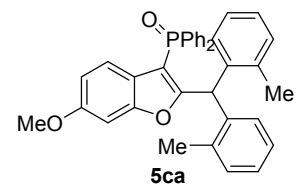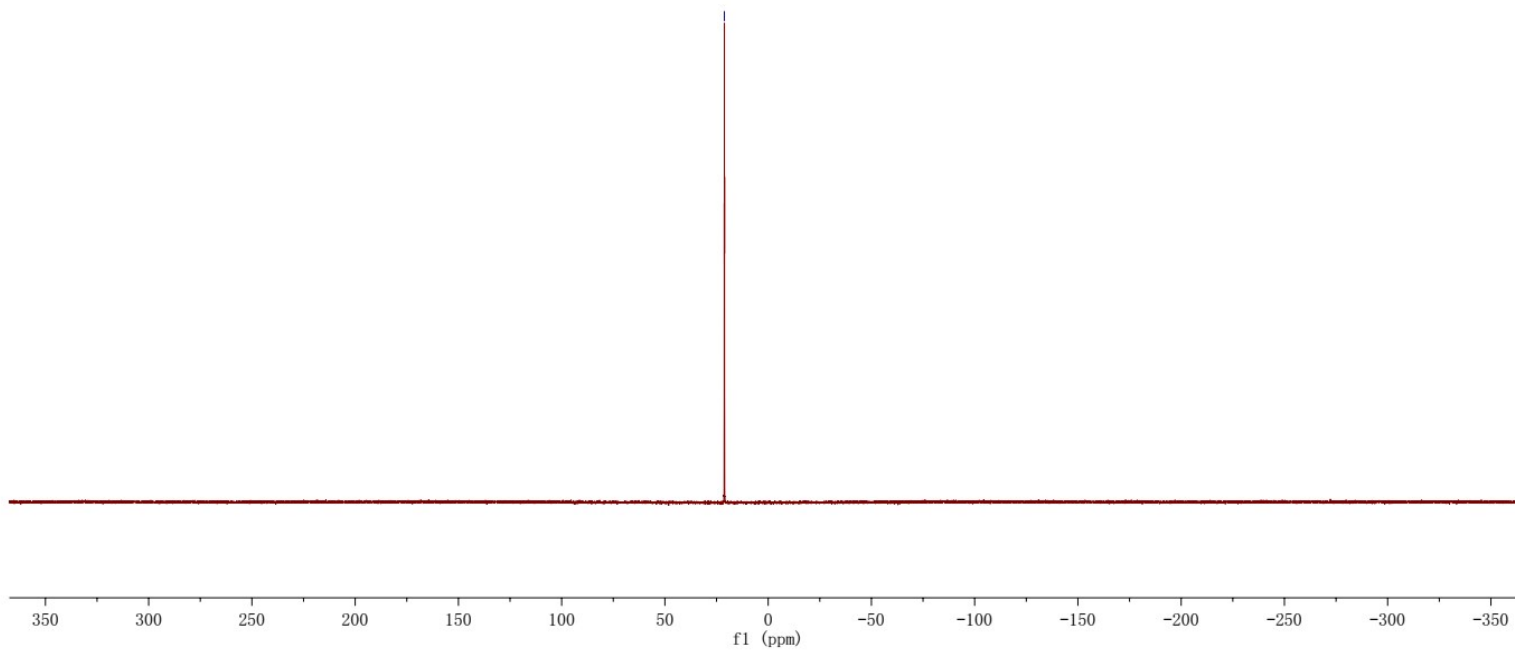



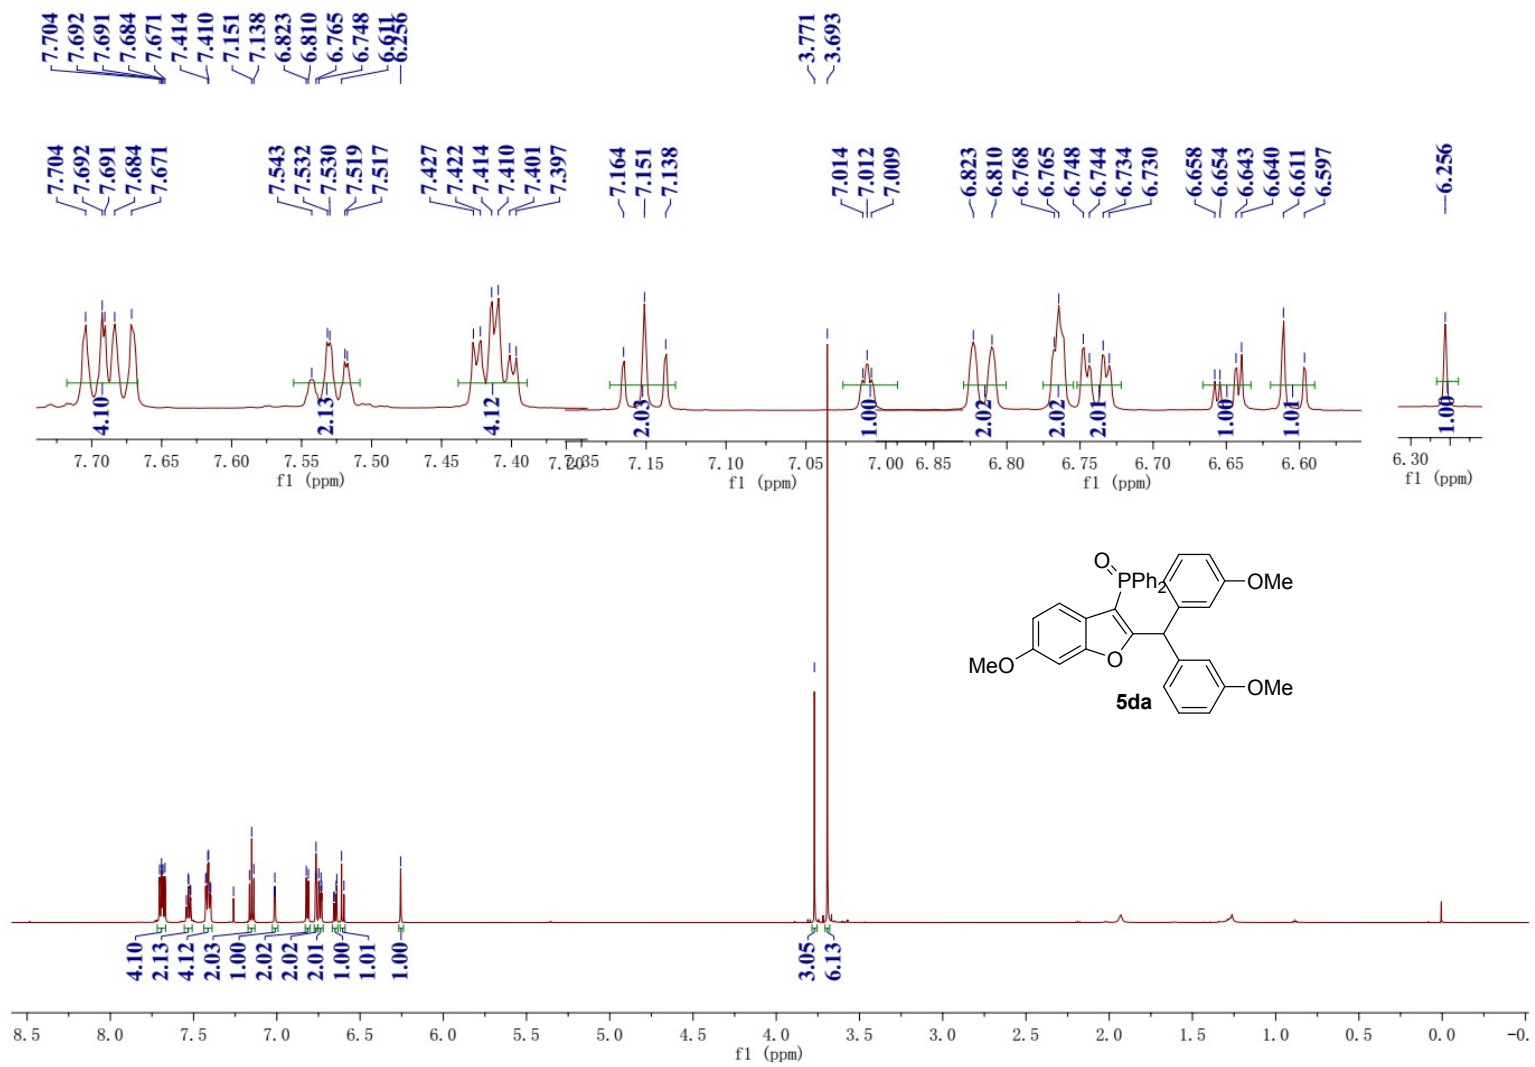

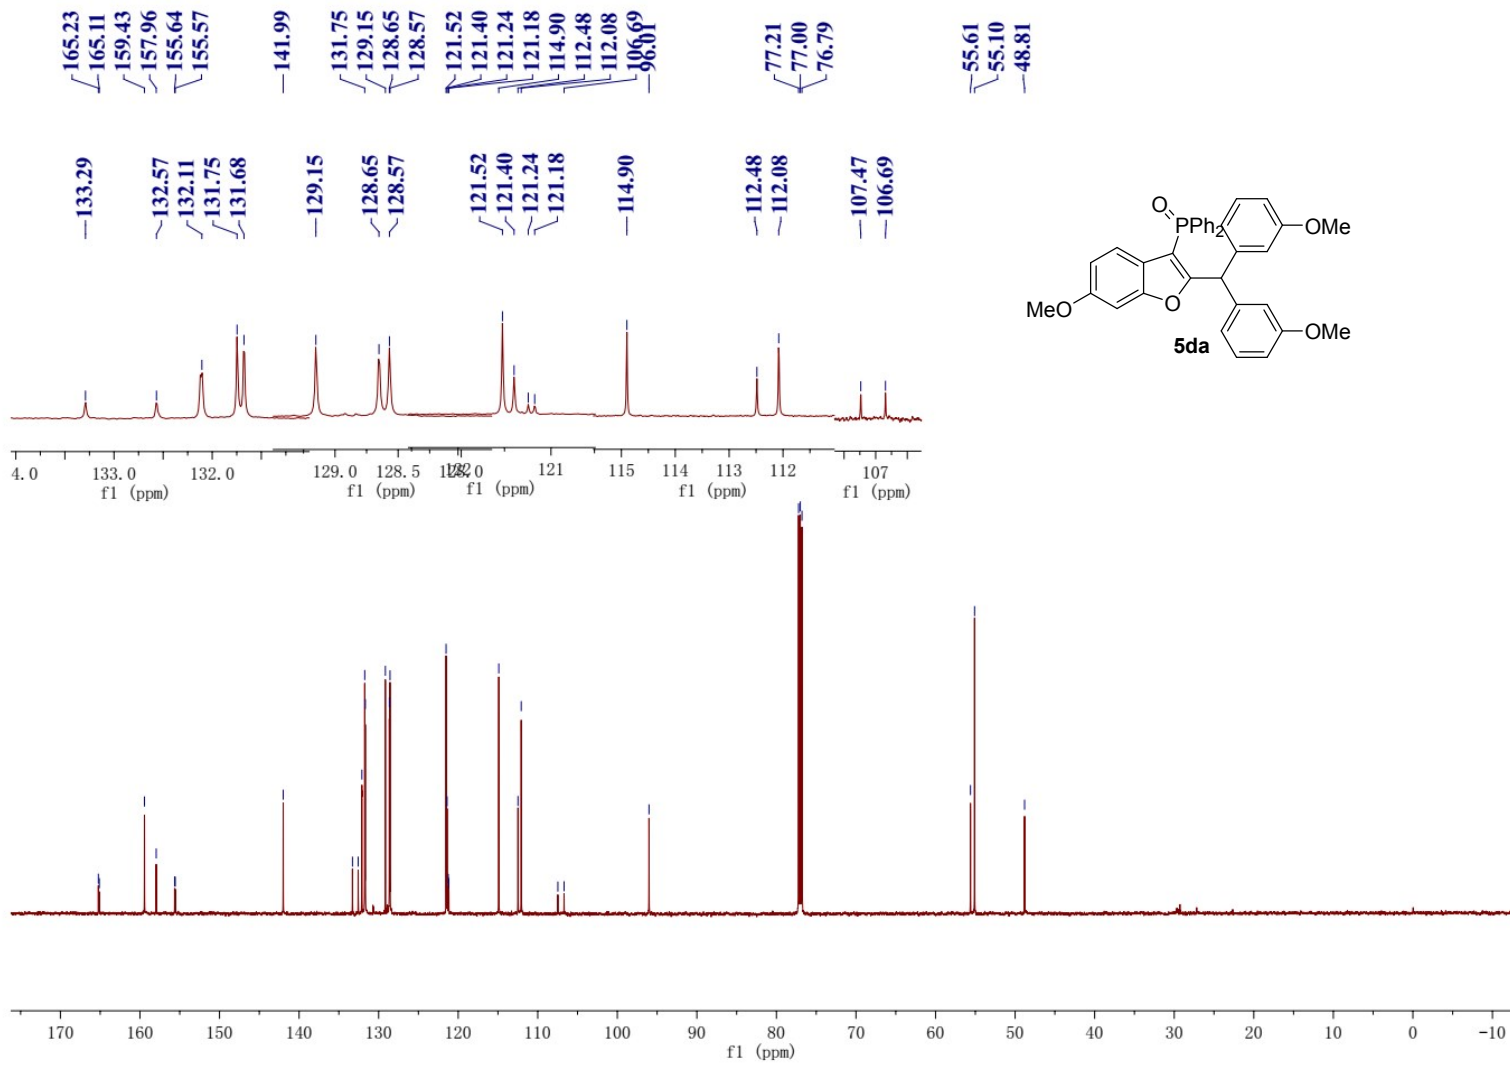

— 22.06

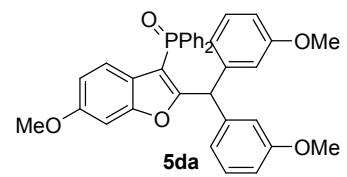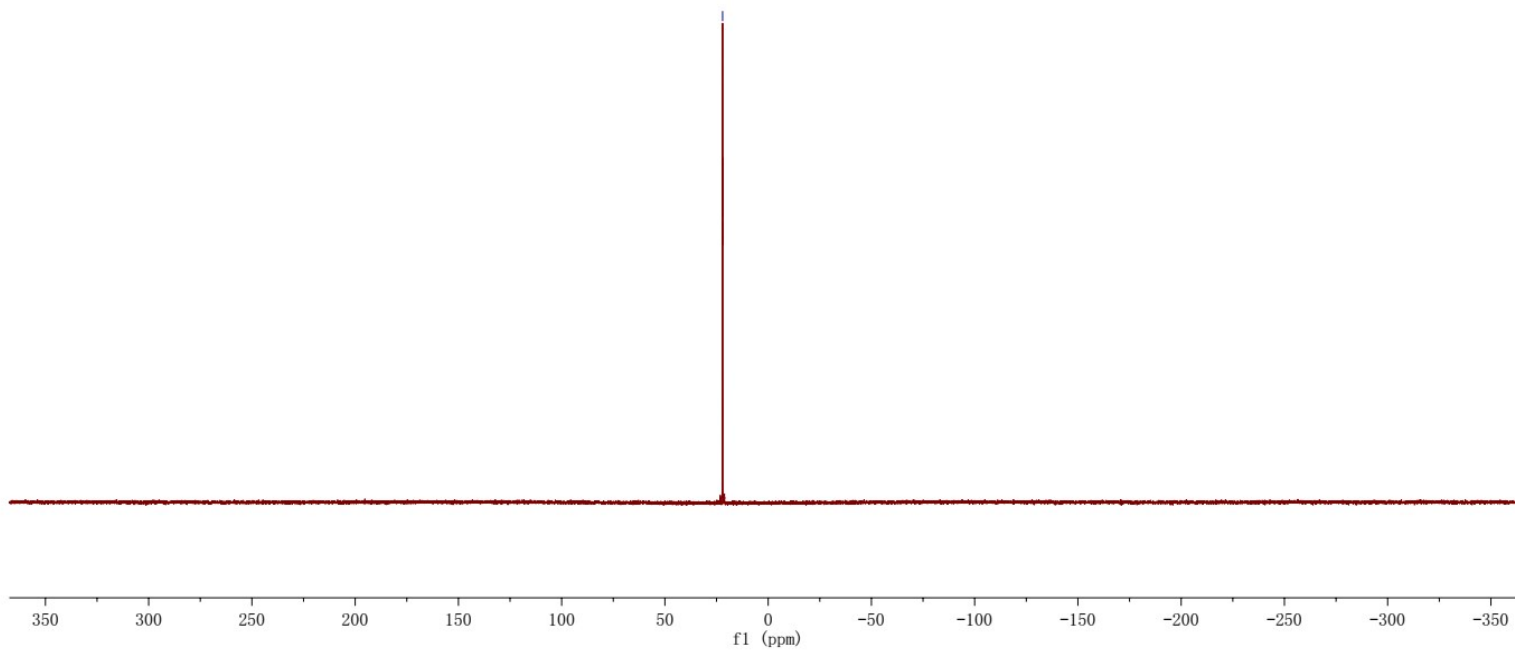

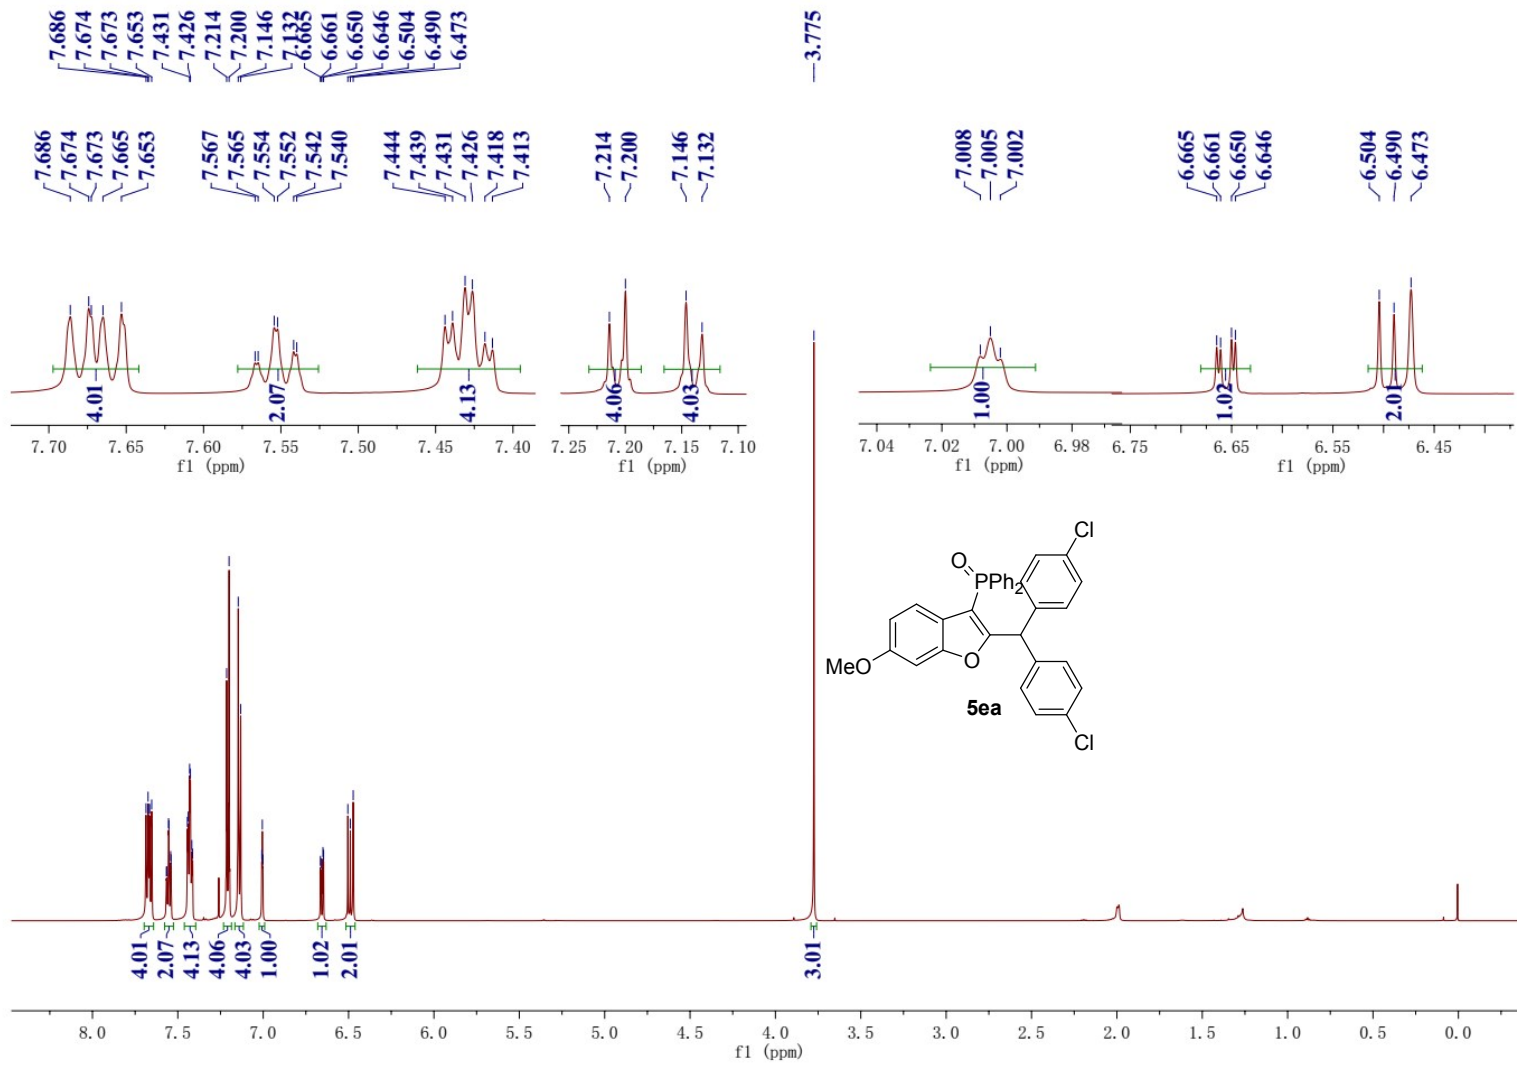

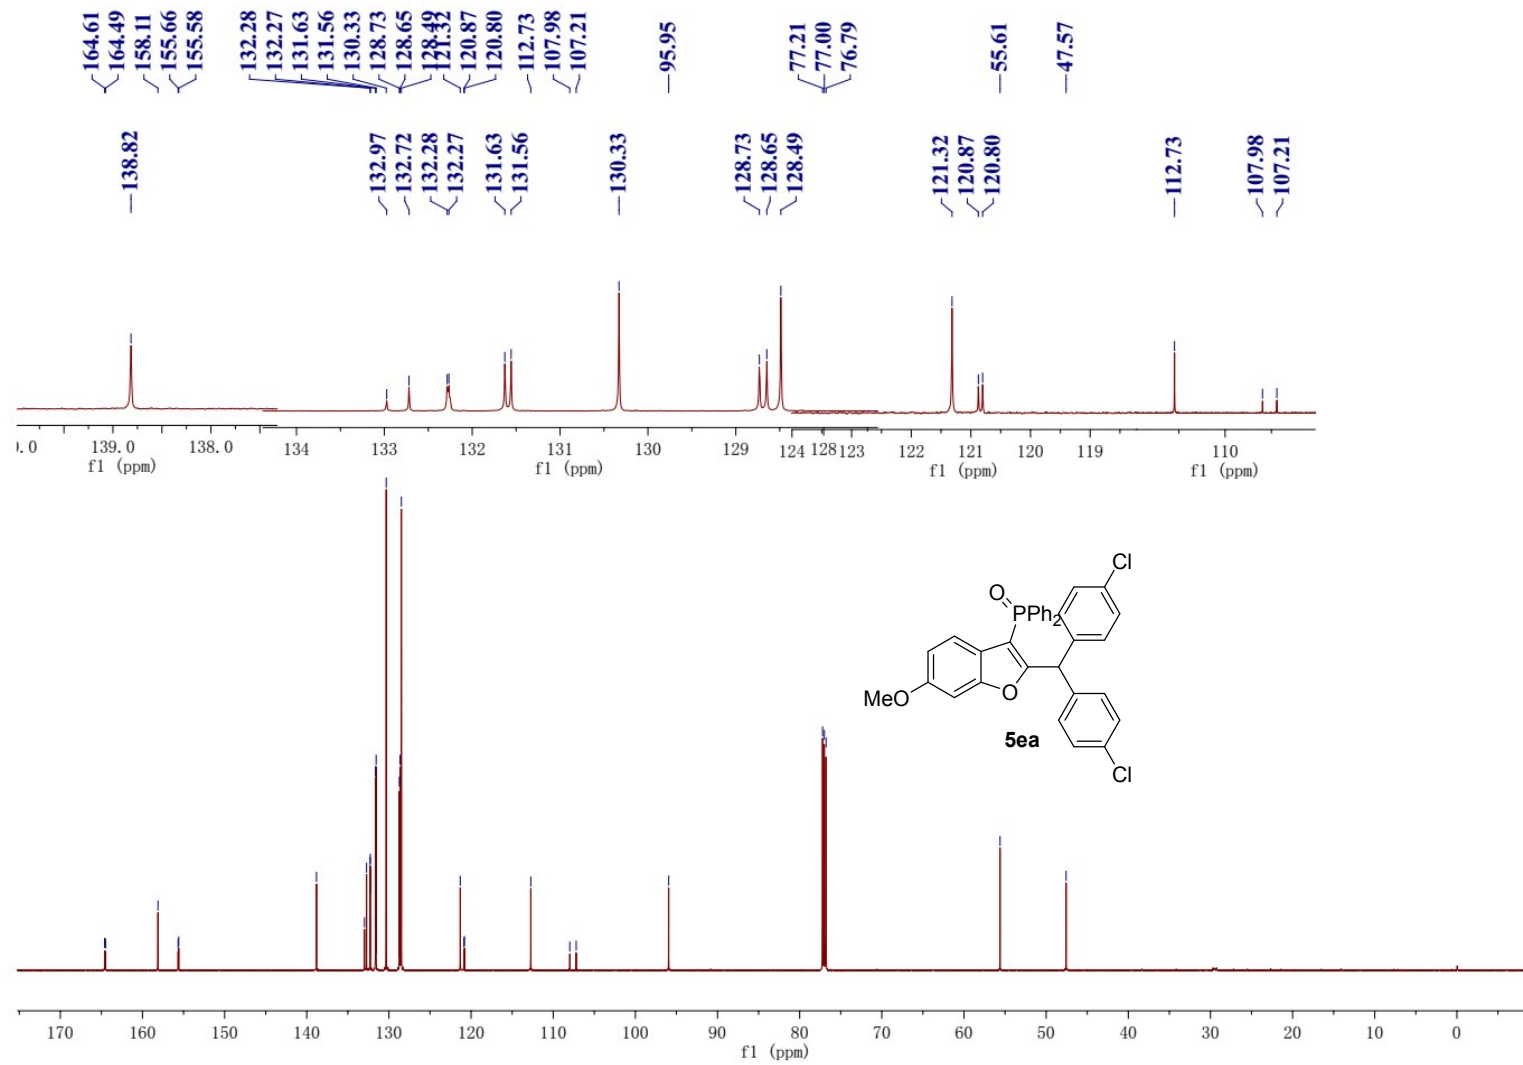

—21.50

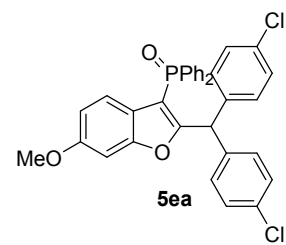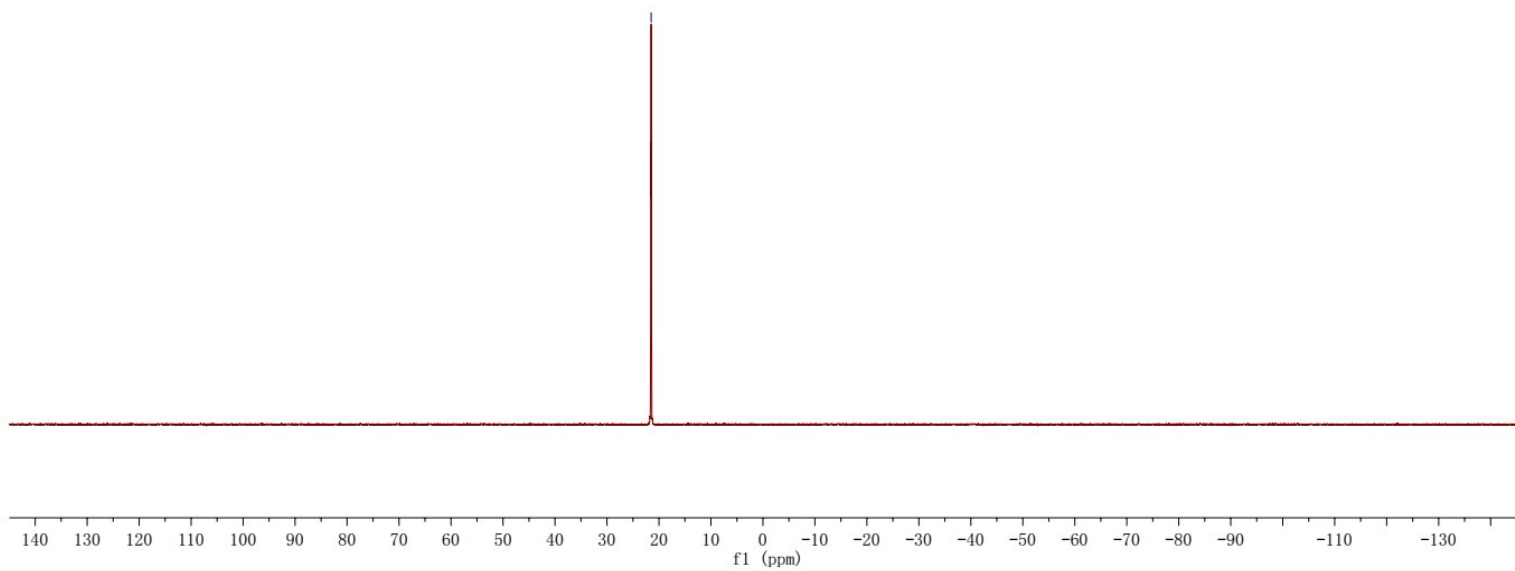



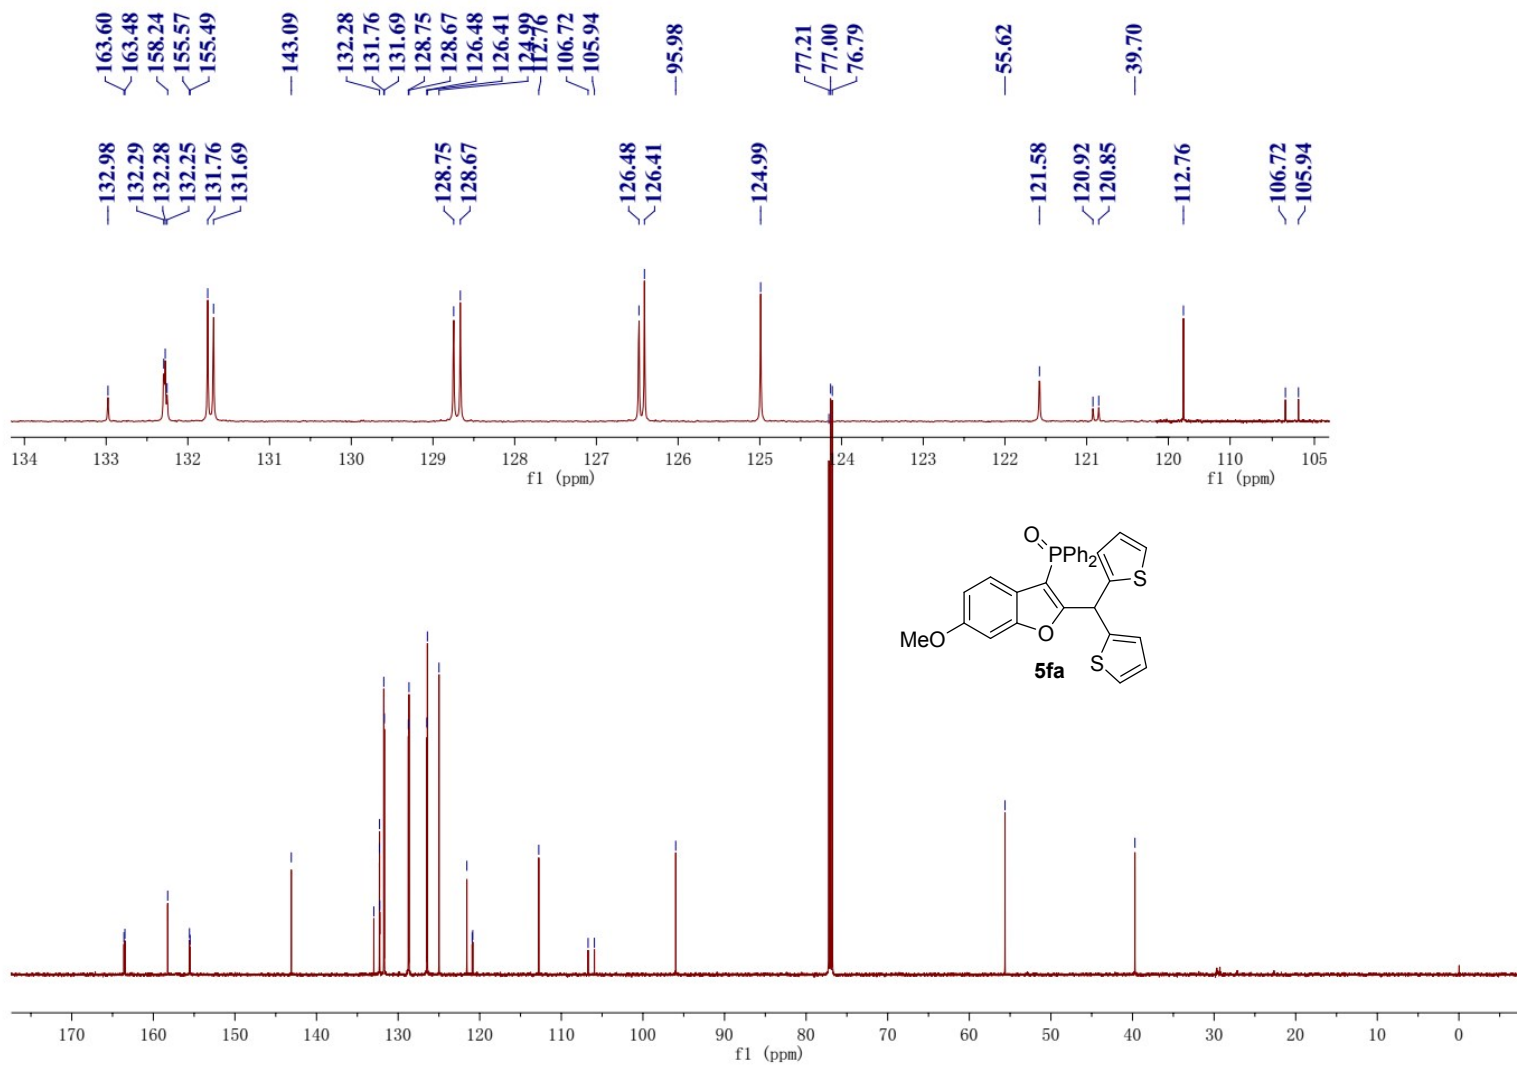



—21.45

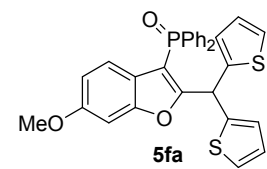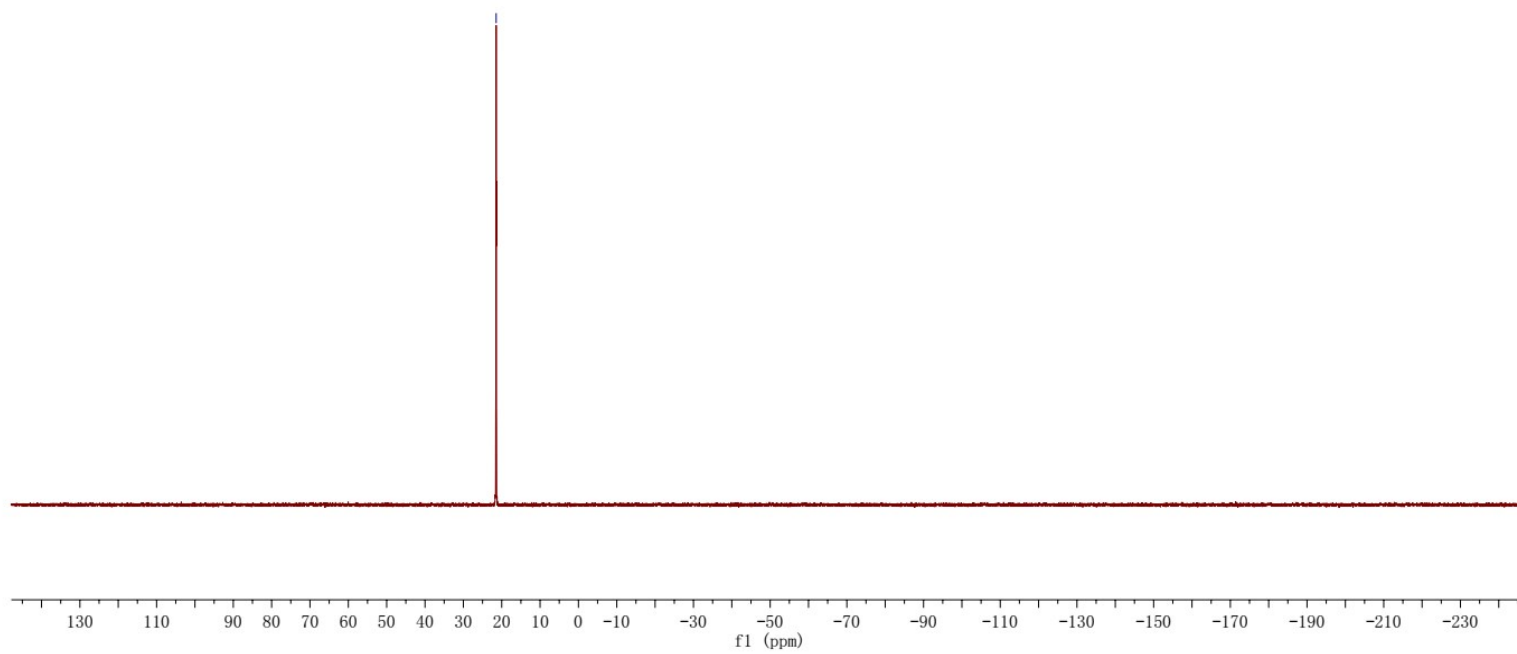

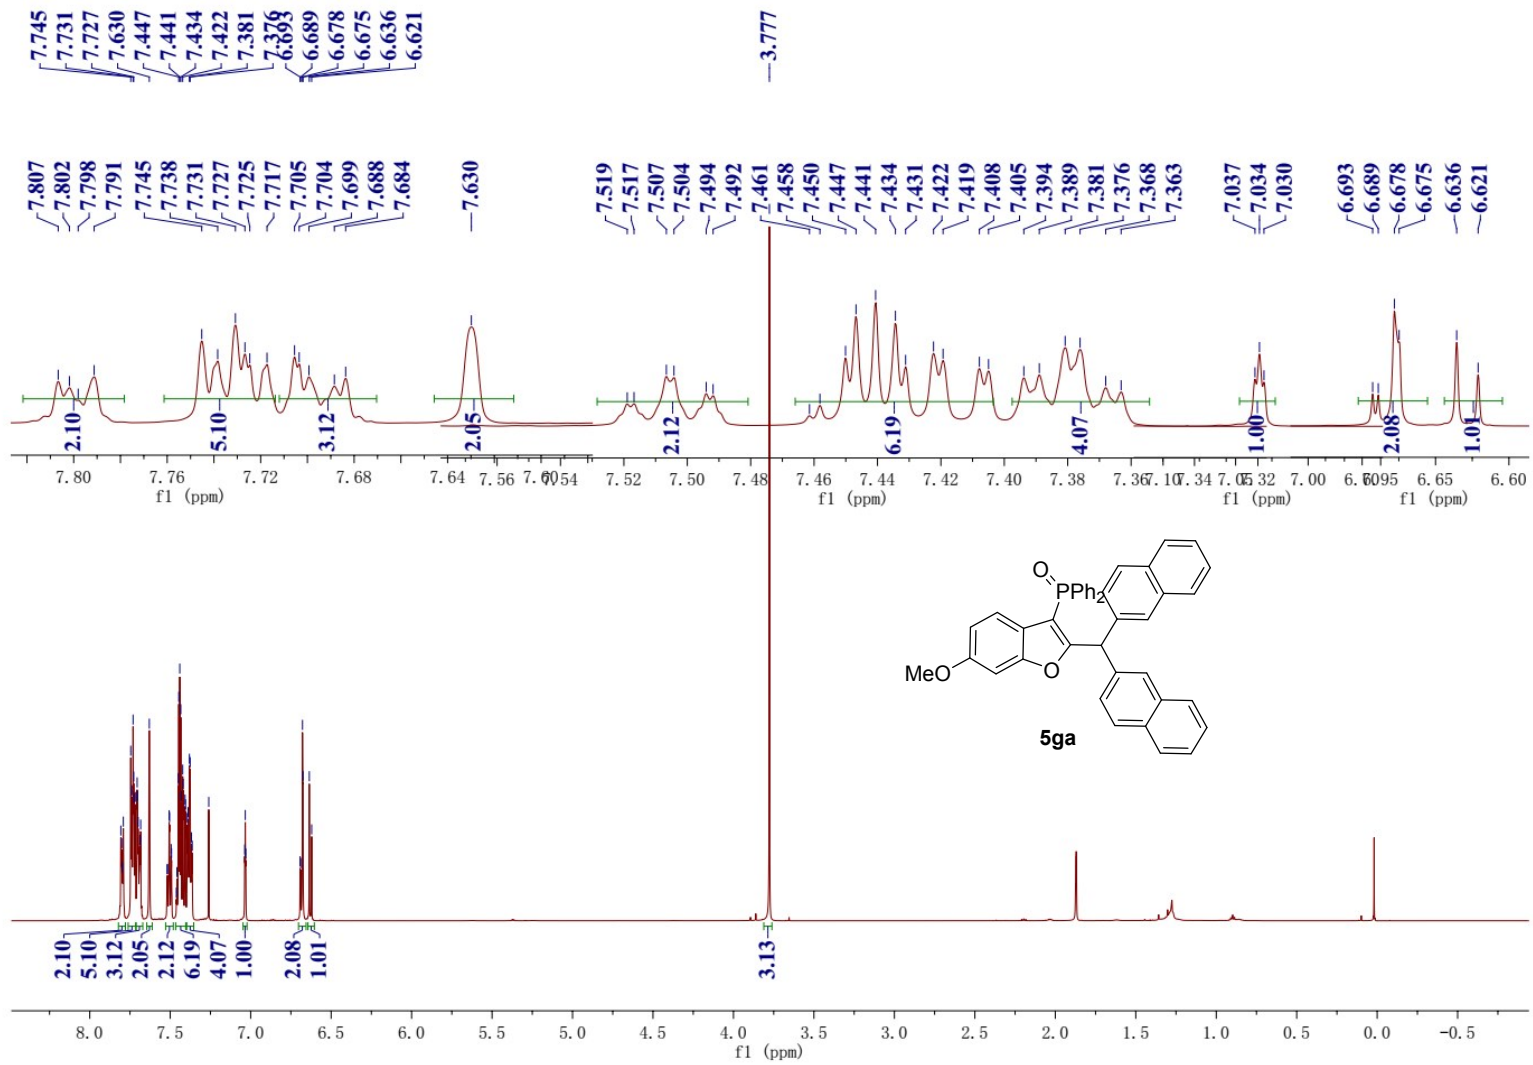

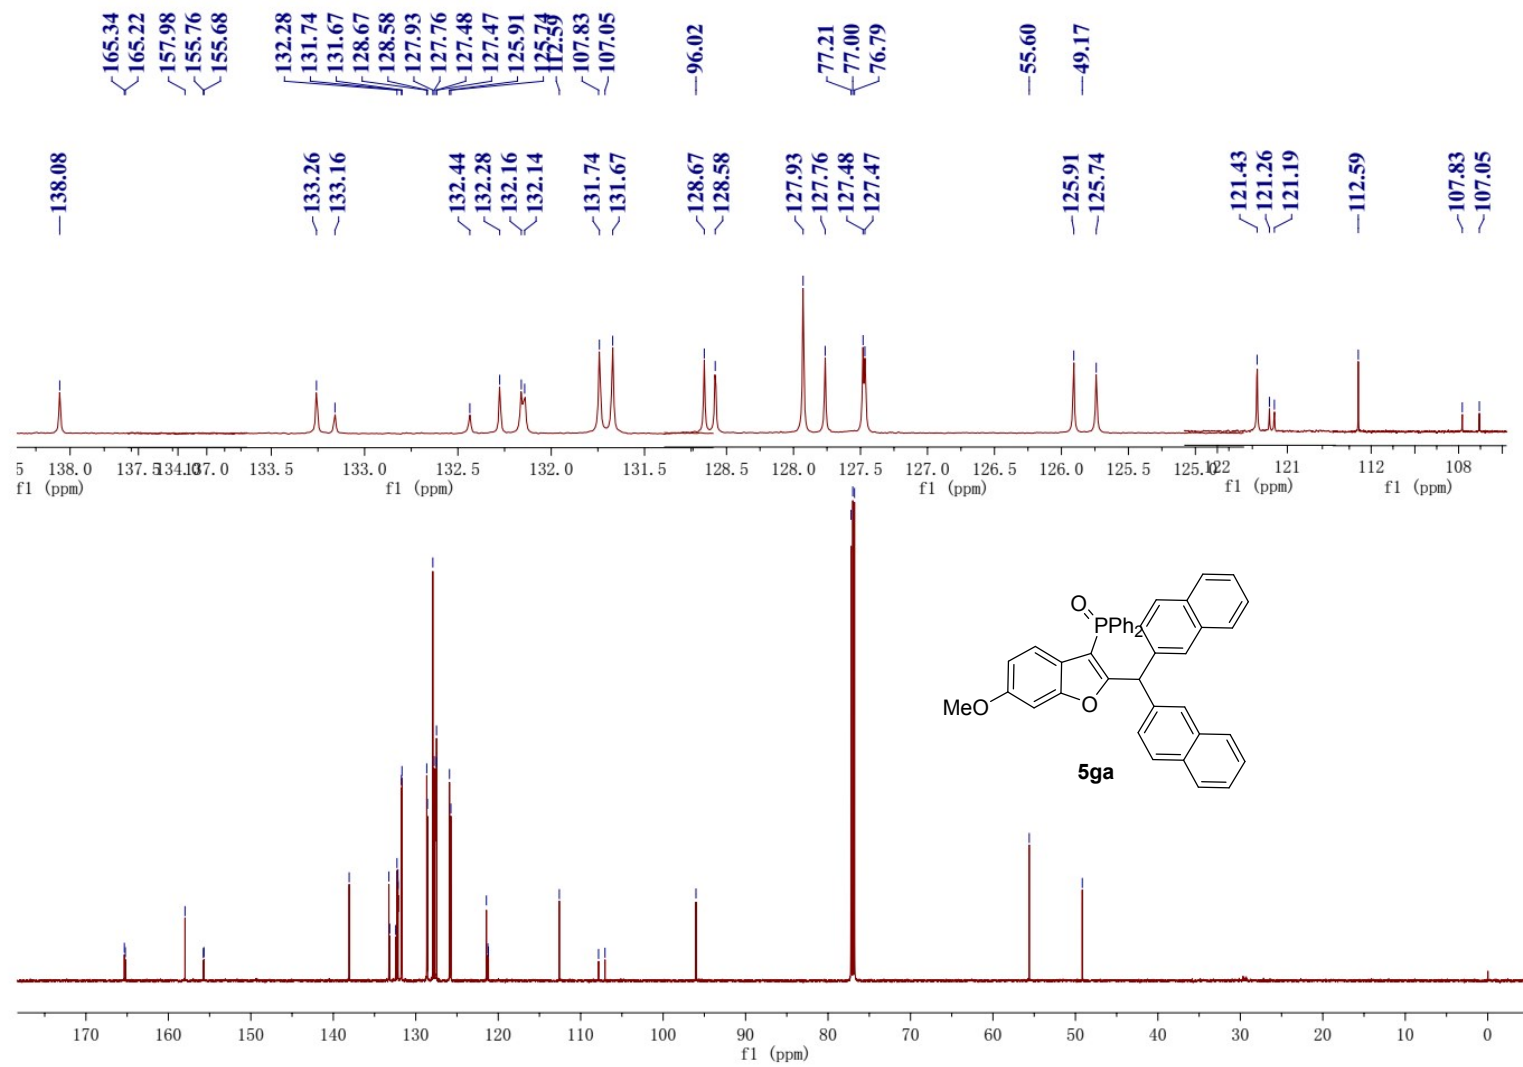

—21.51

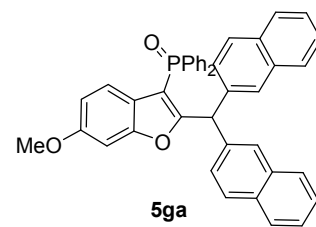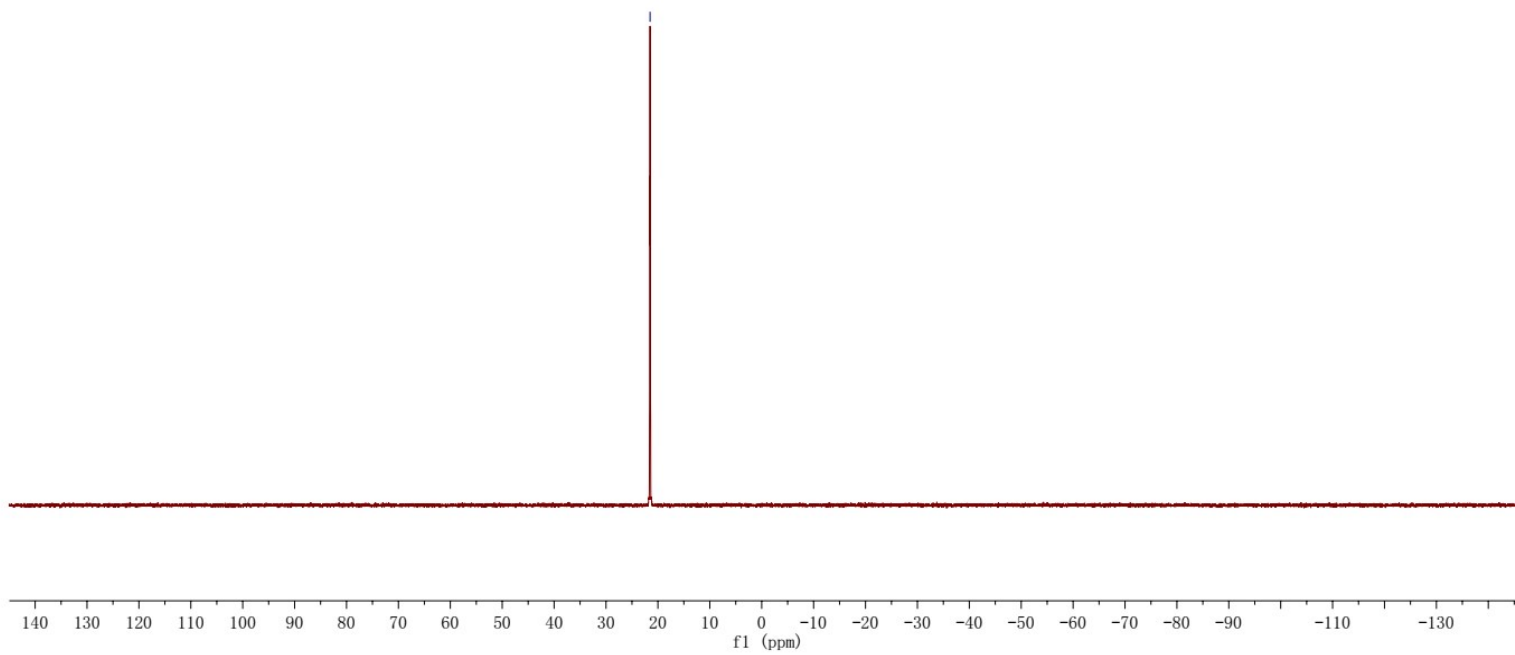

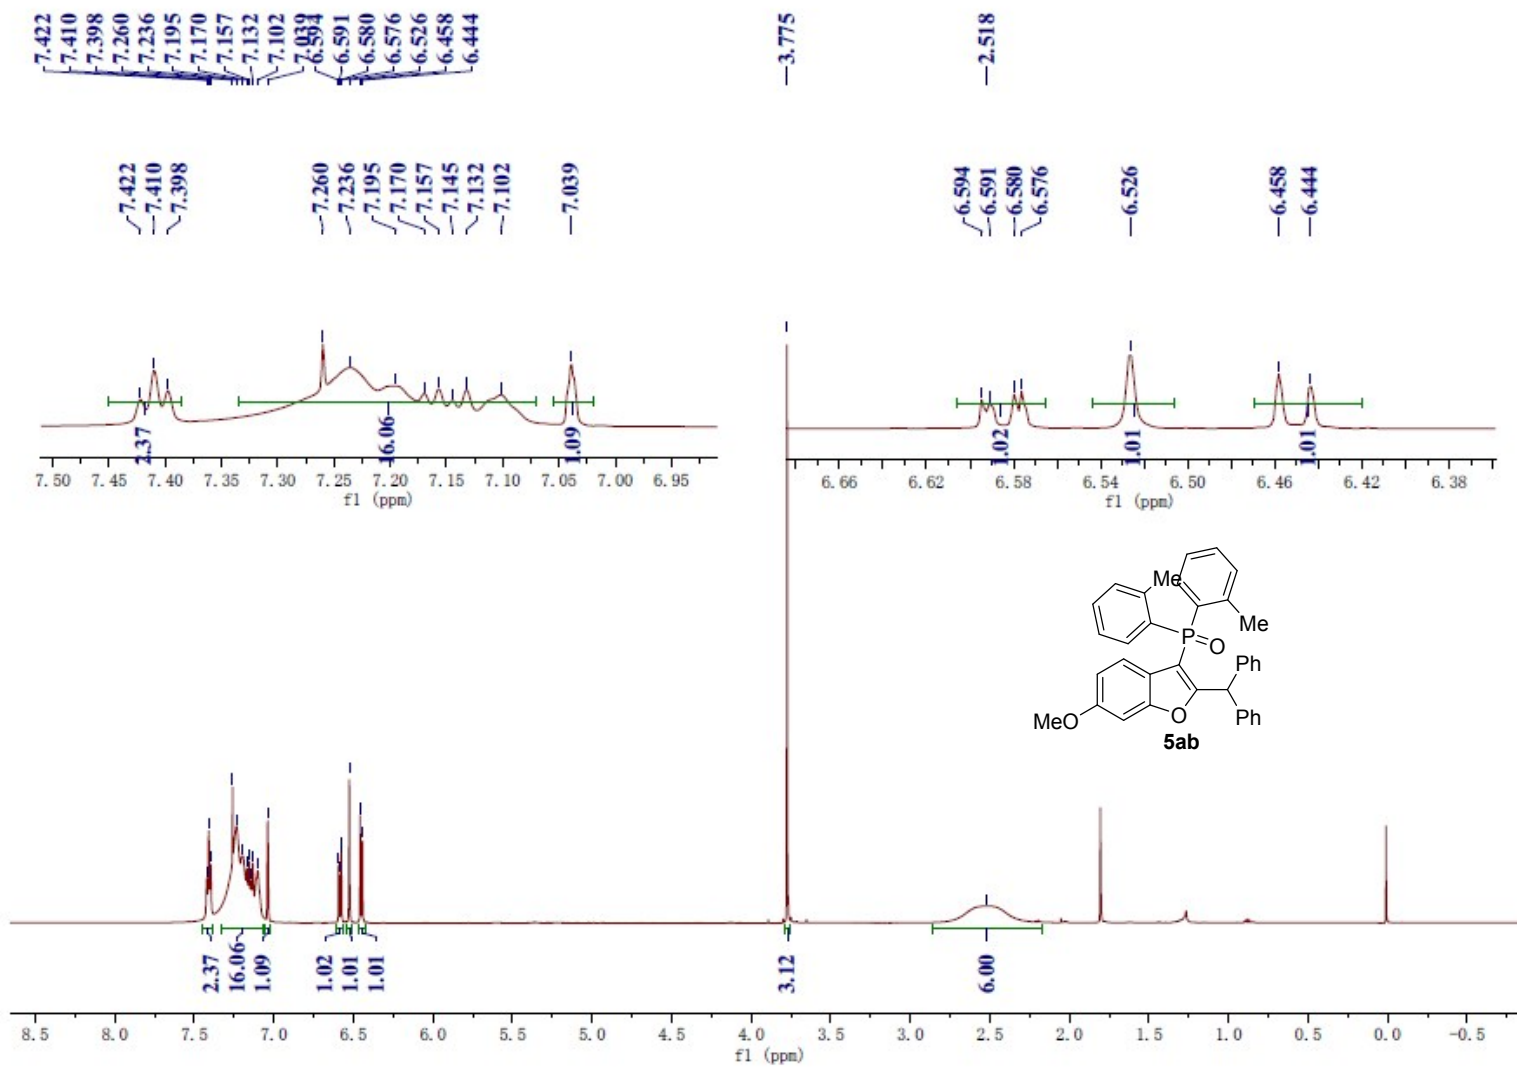

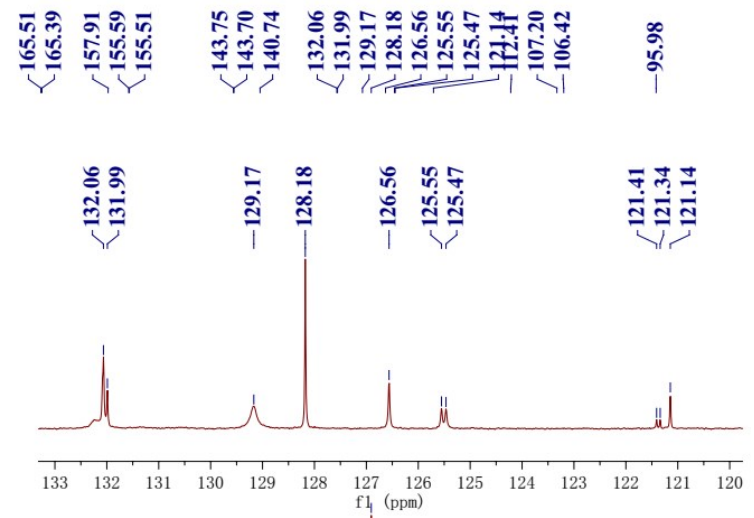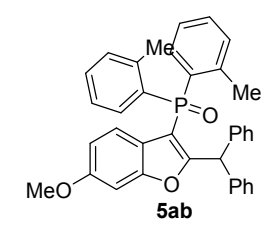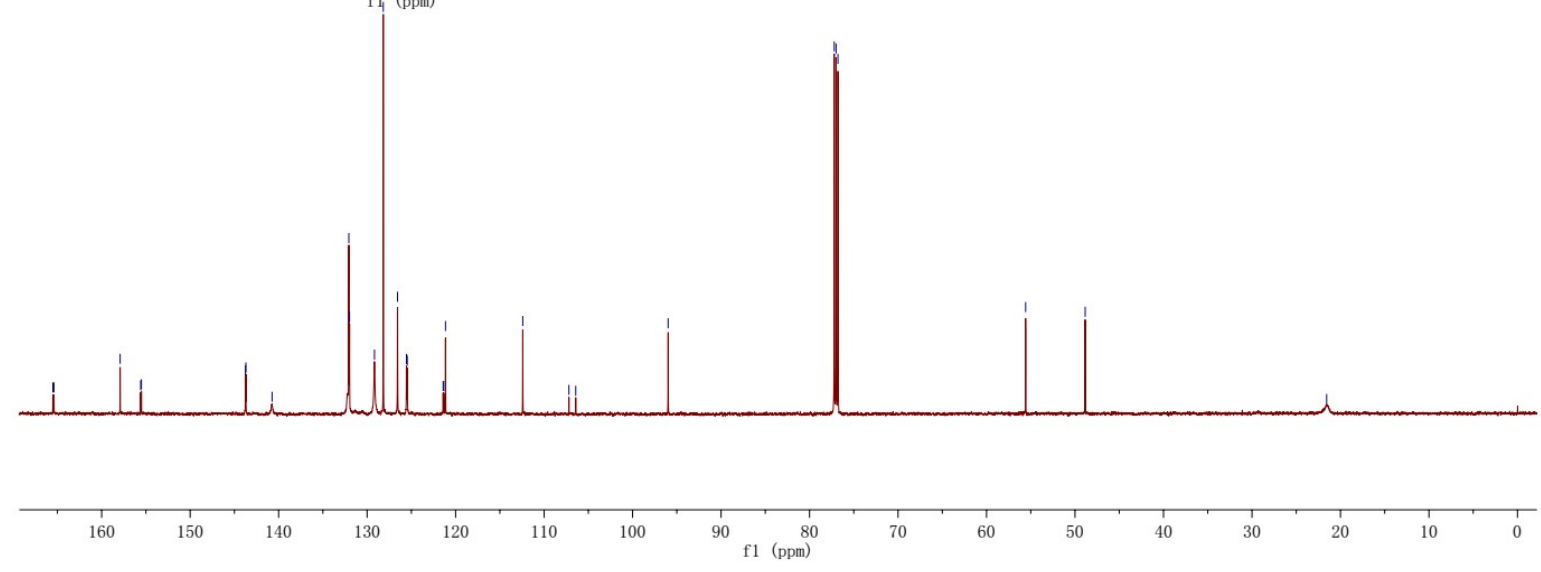

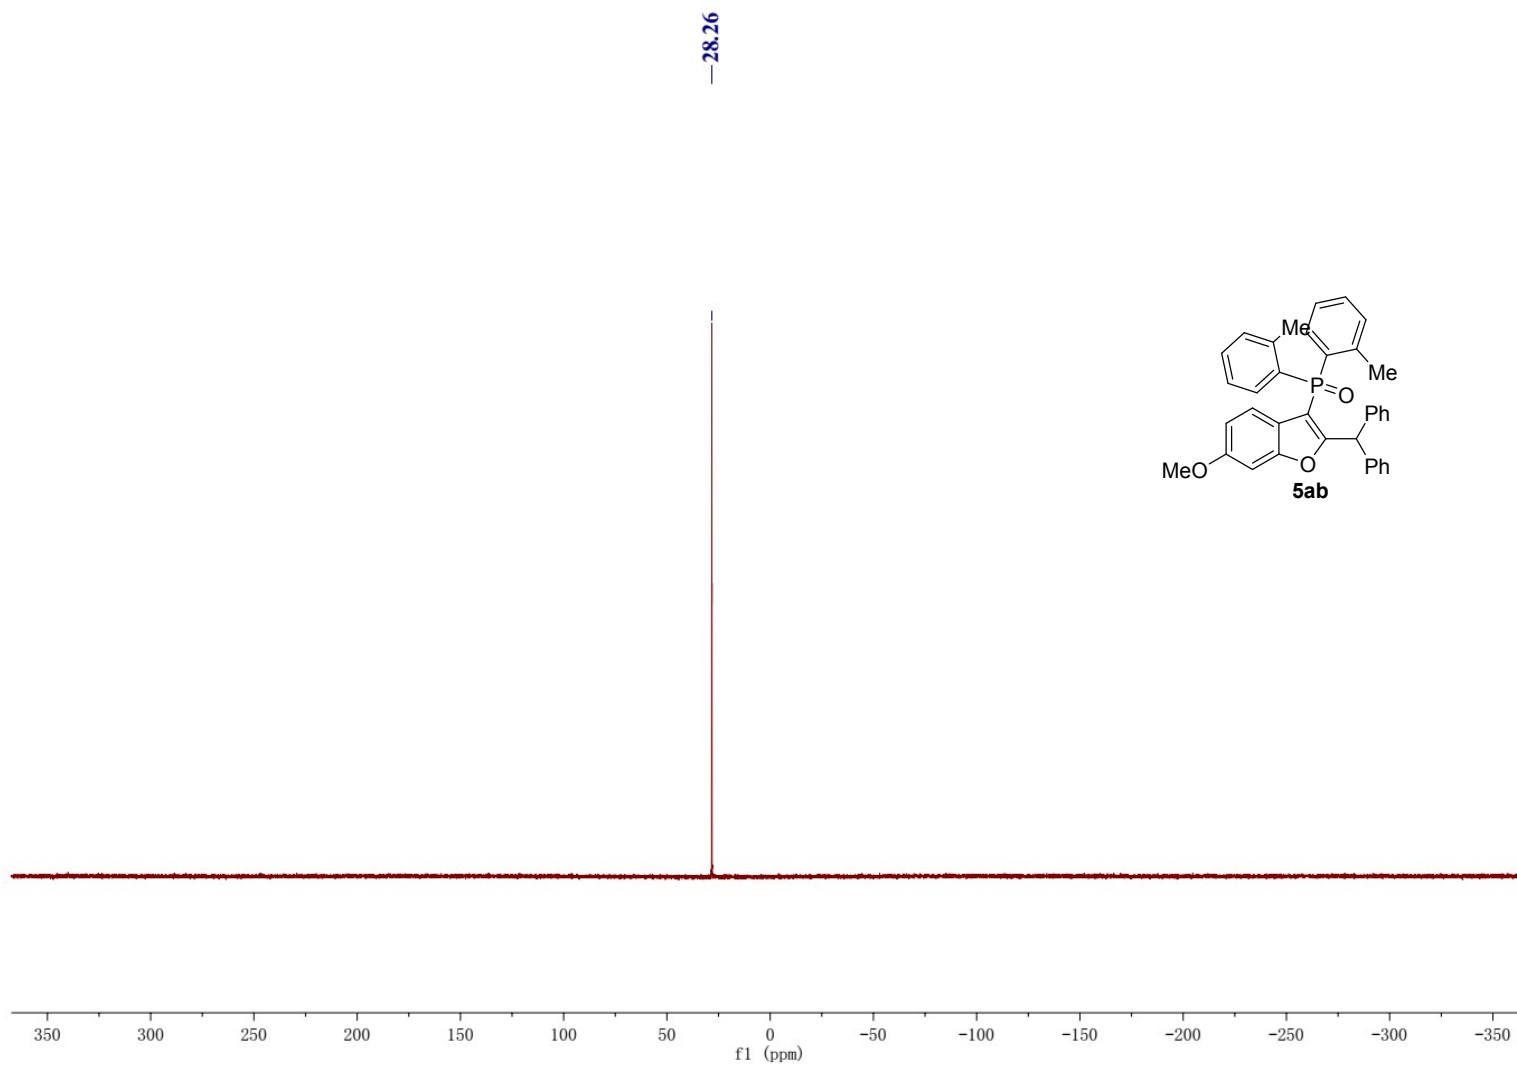







— 22.32

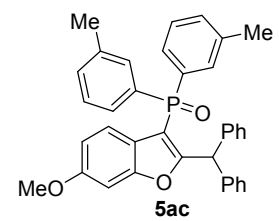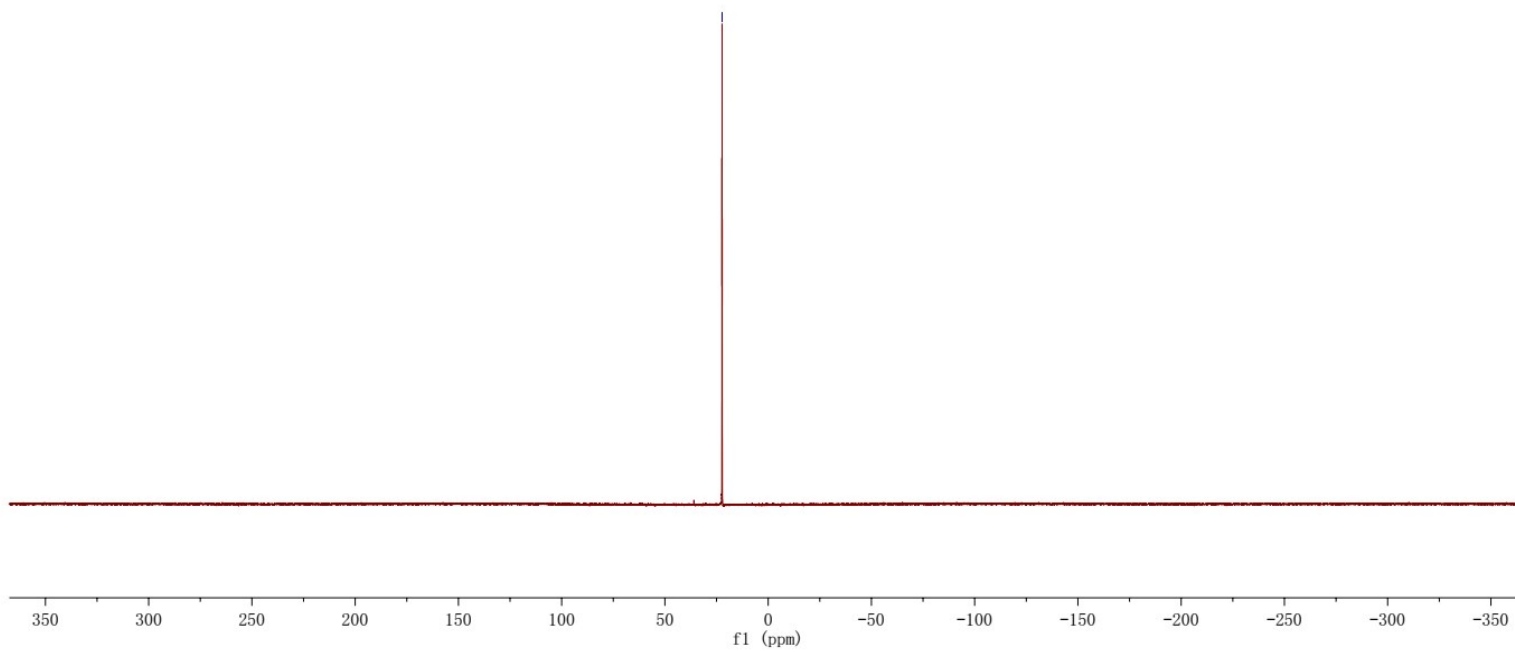

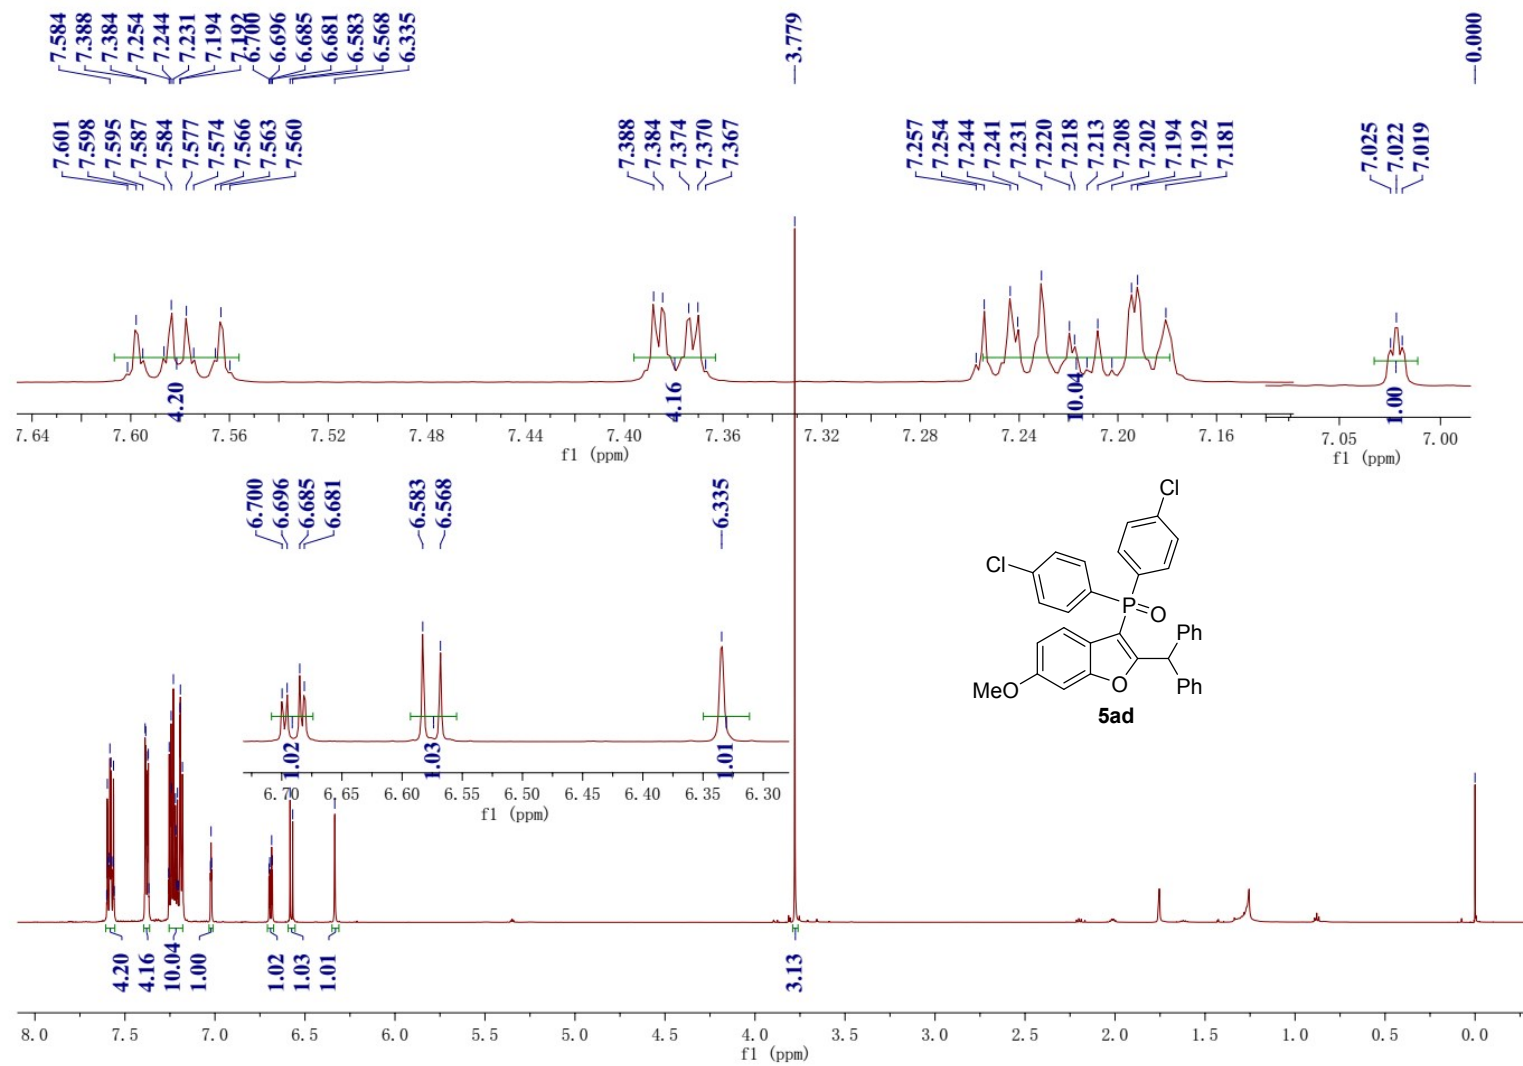

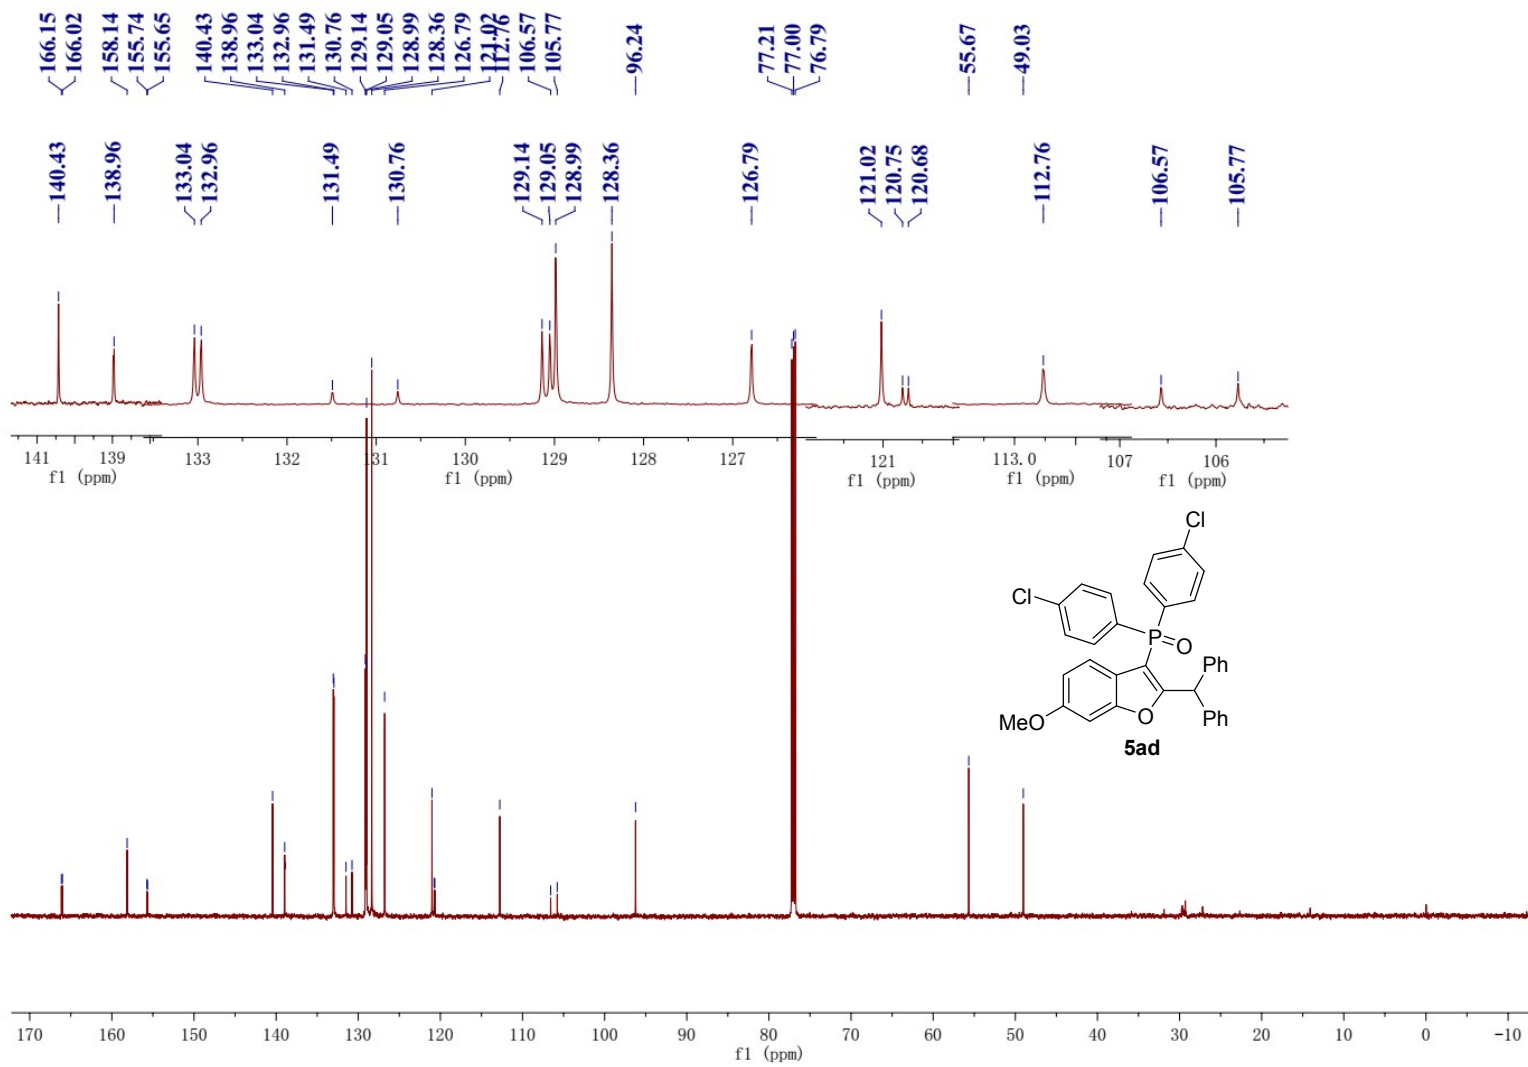

—20.52

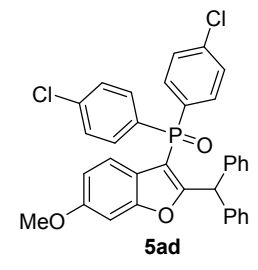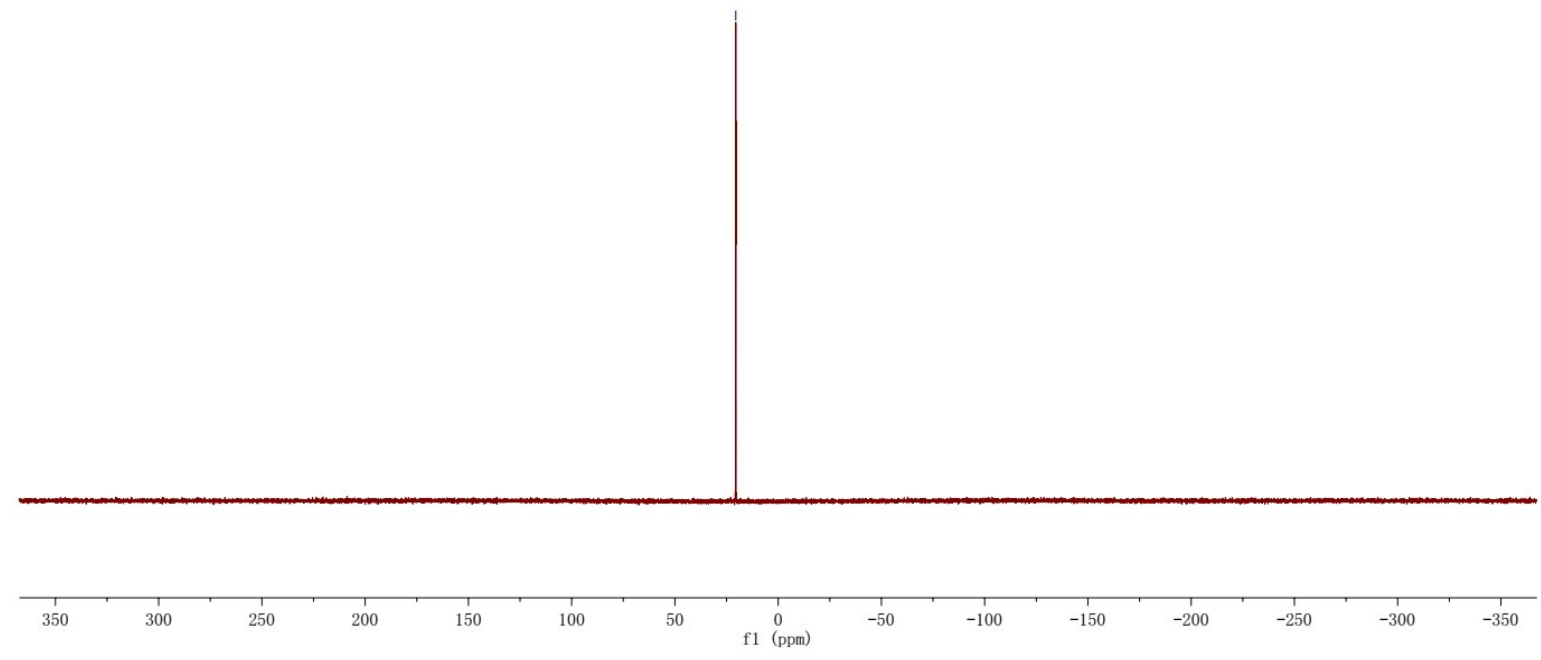

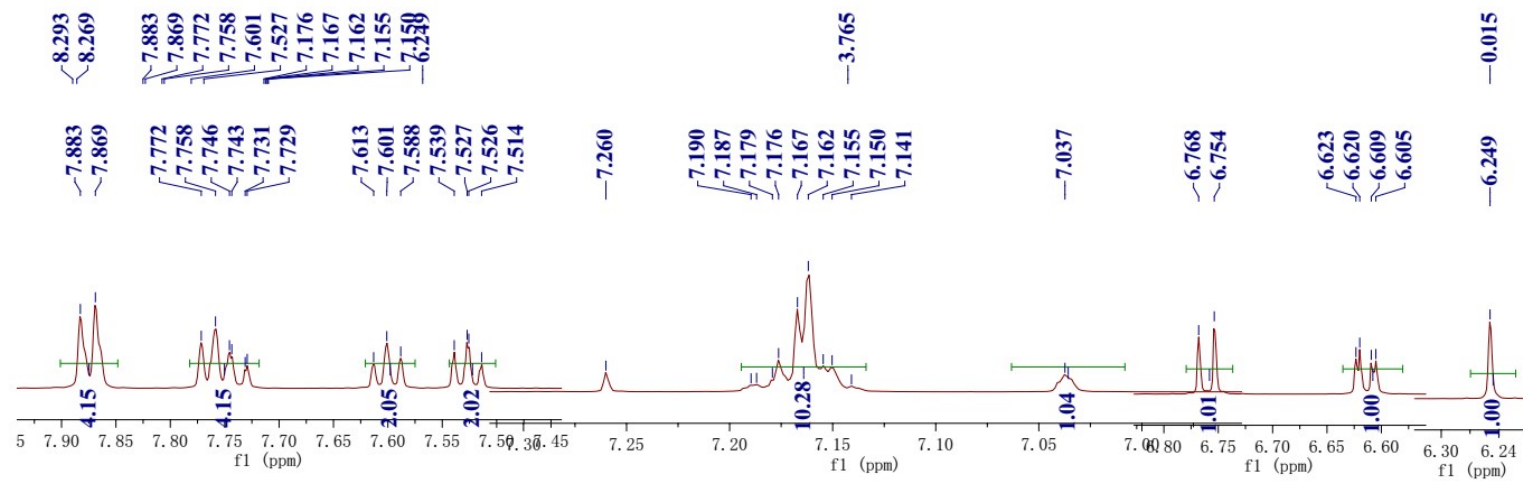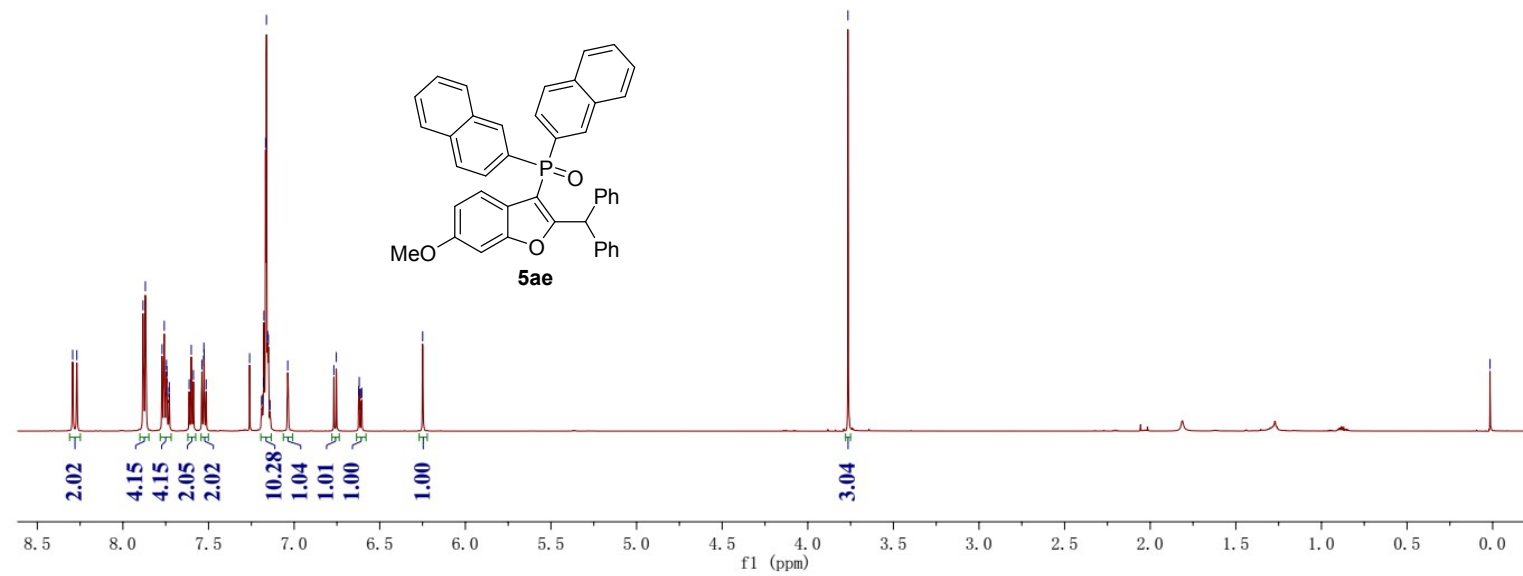

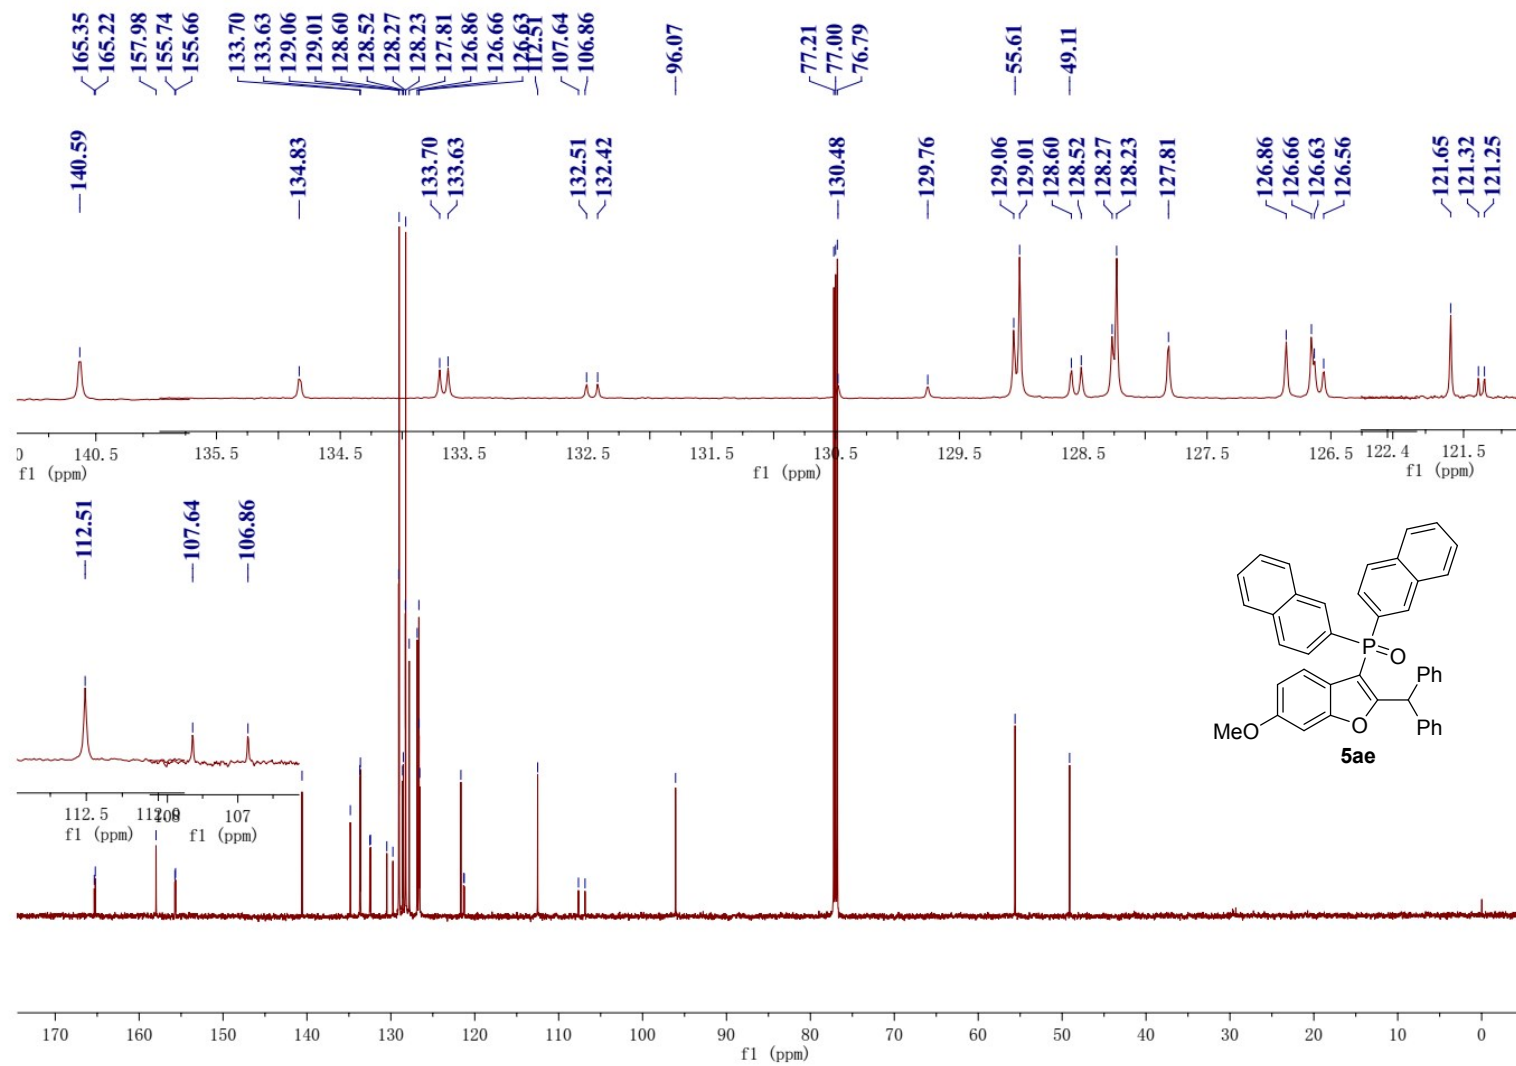

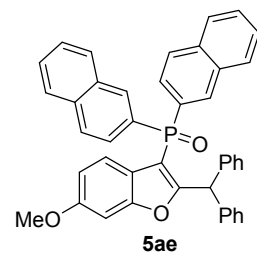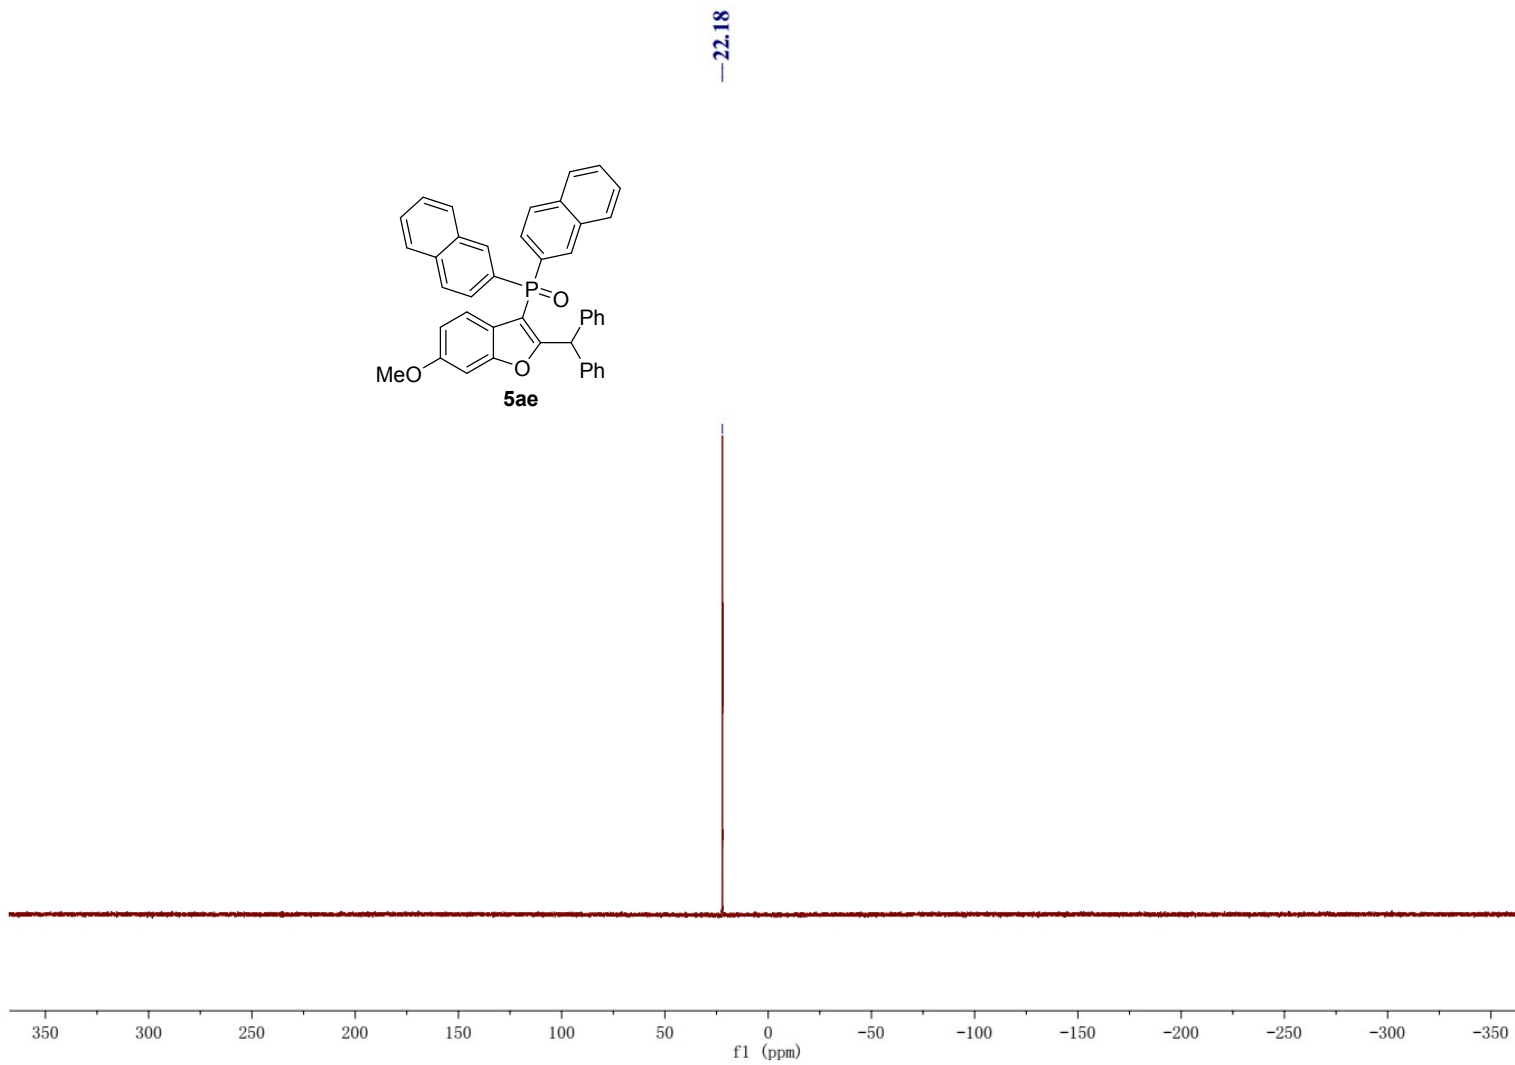



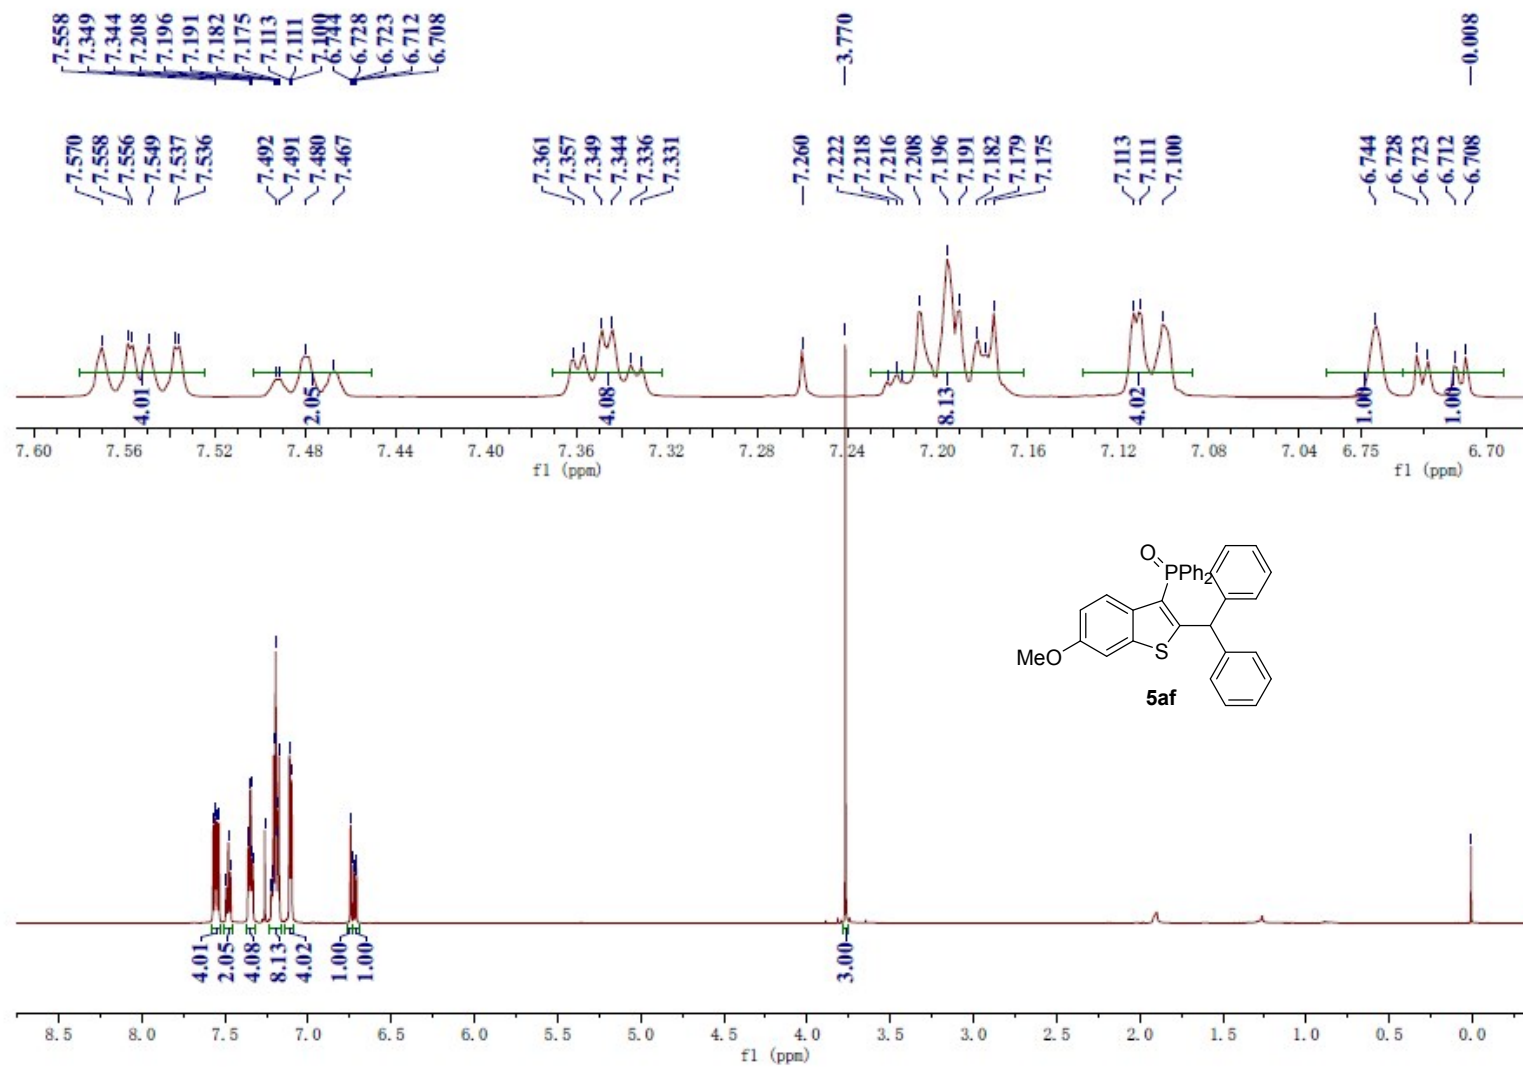

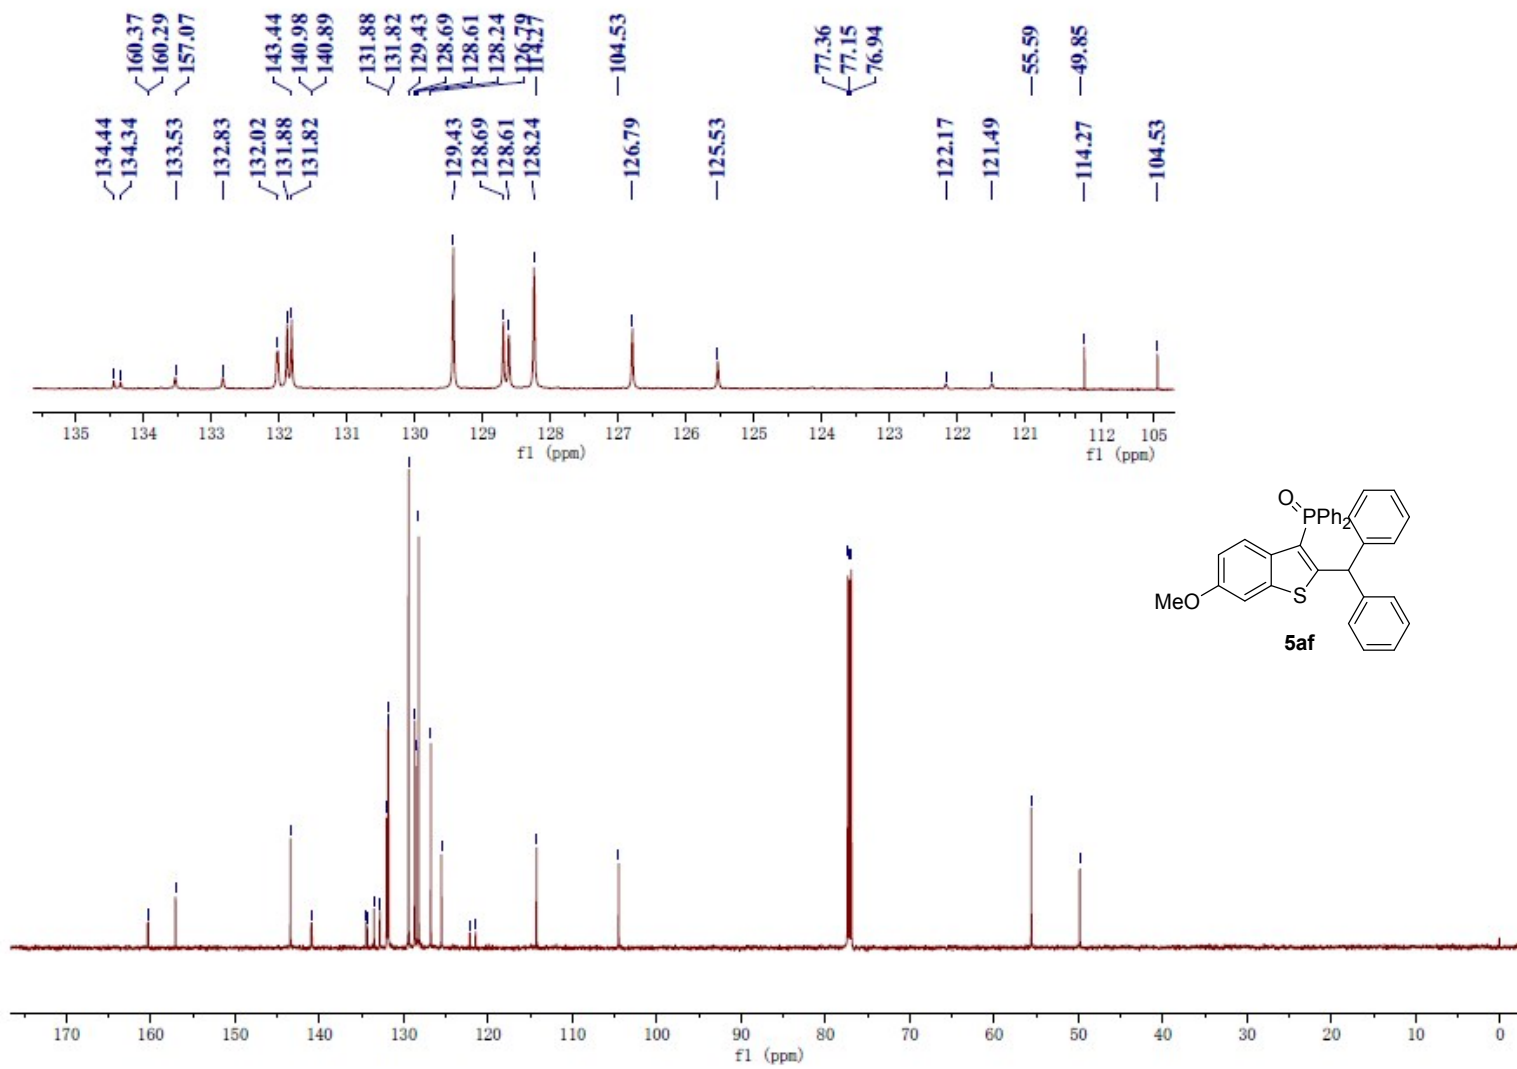

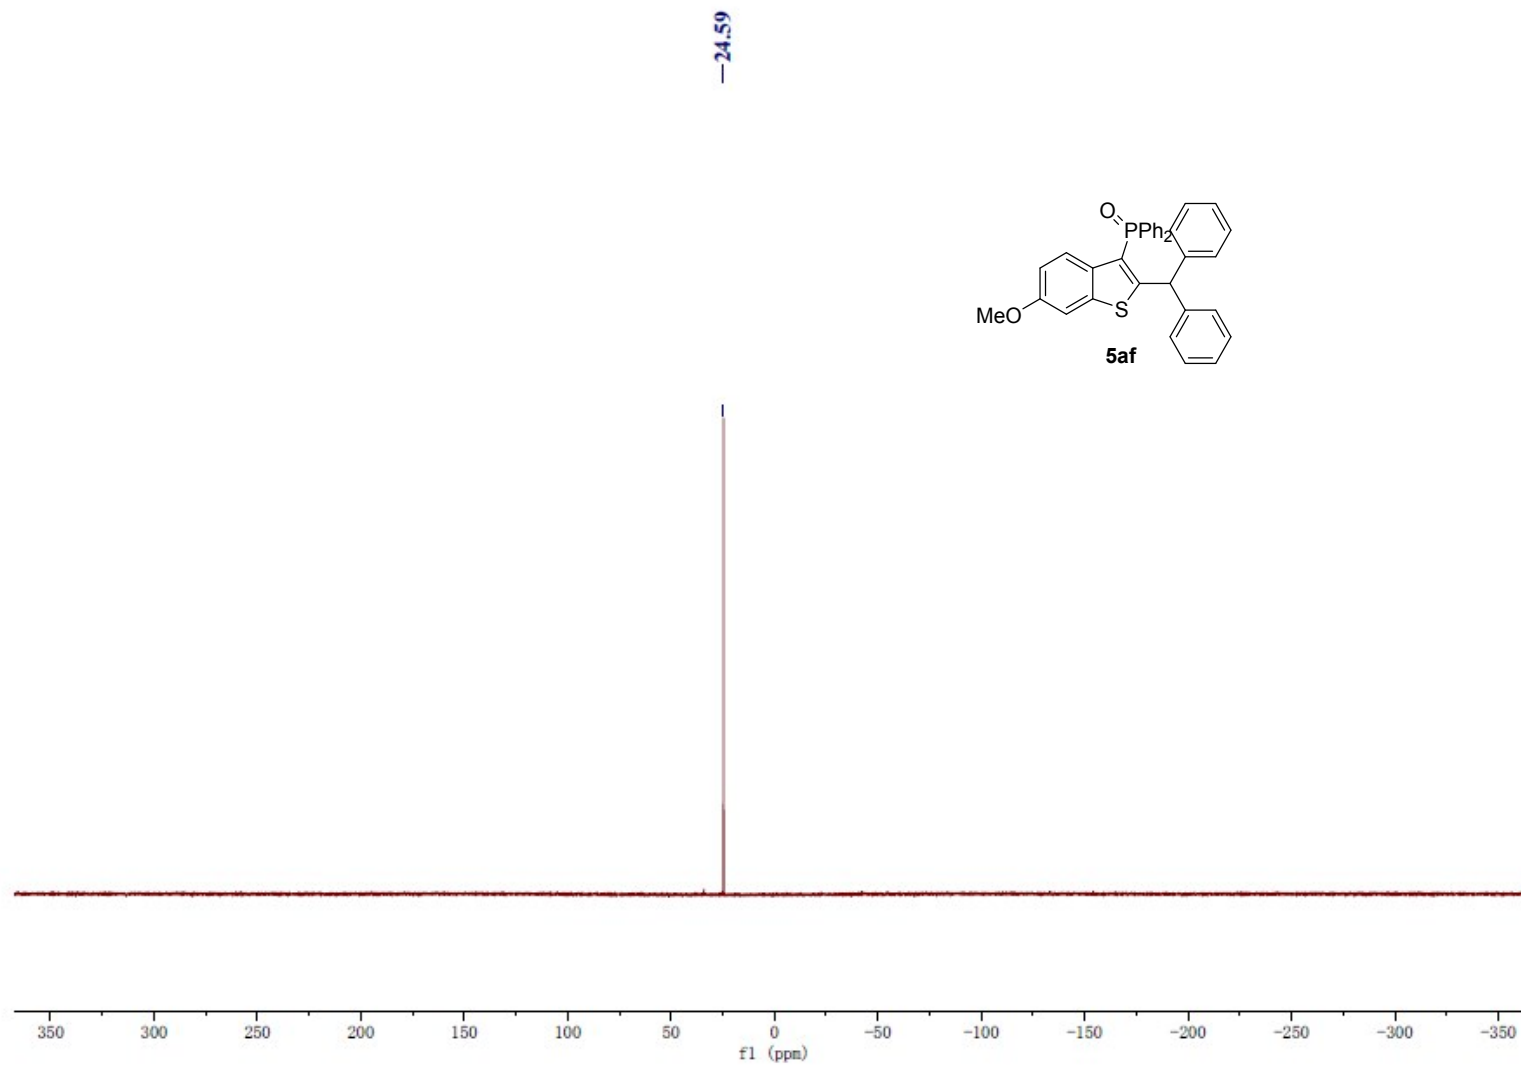



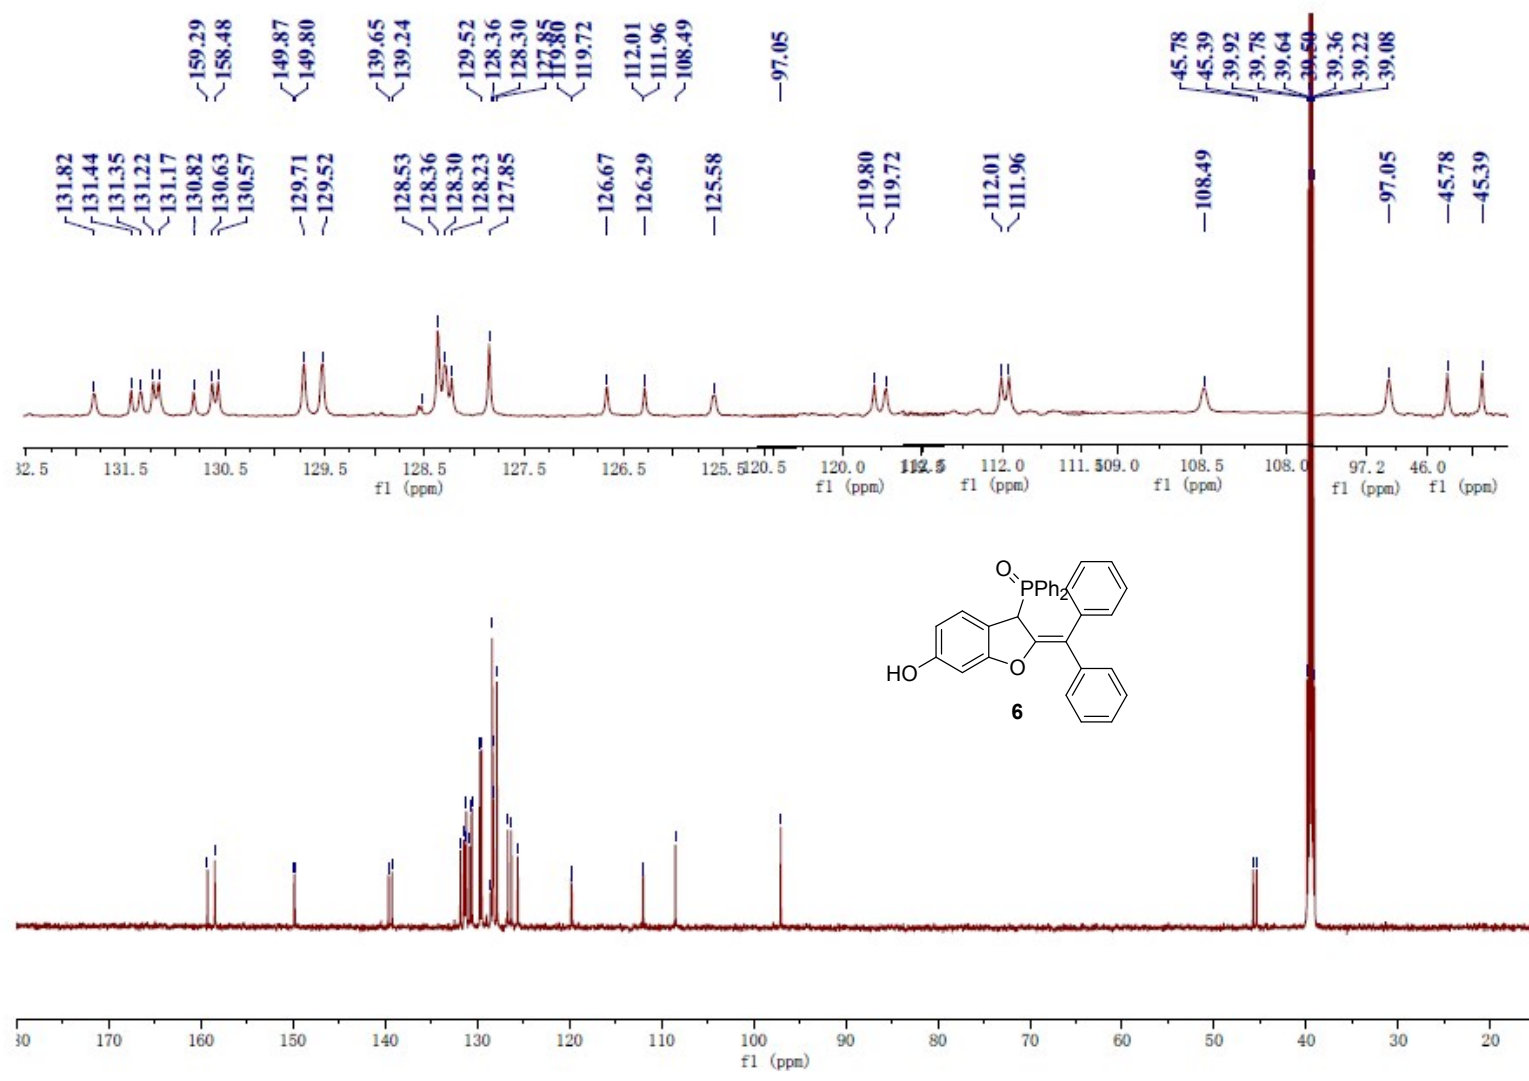

-28.30

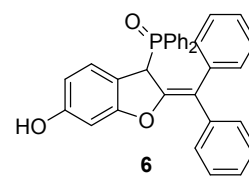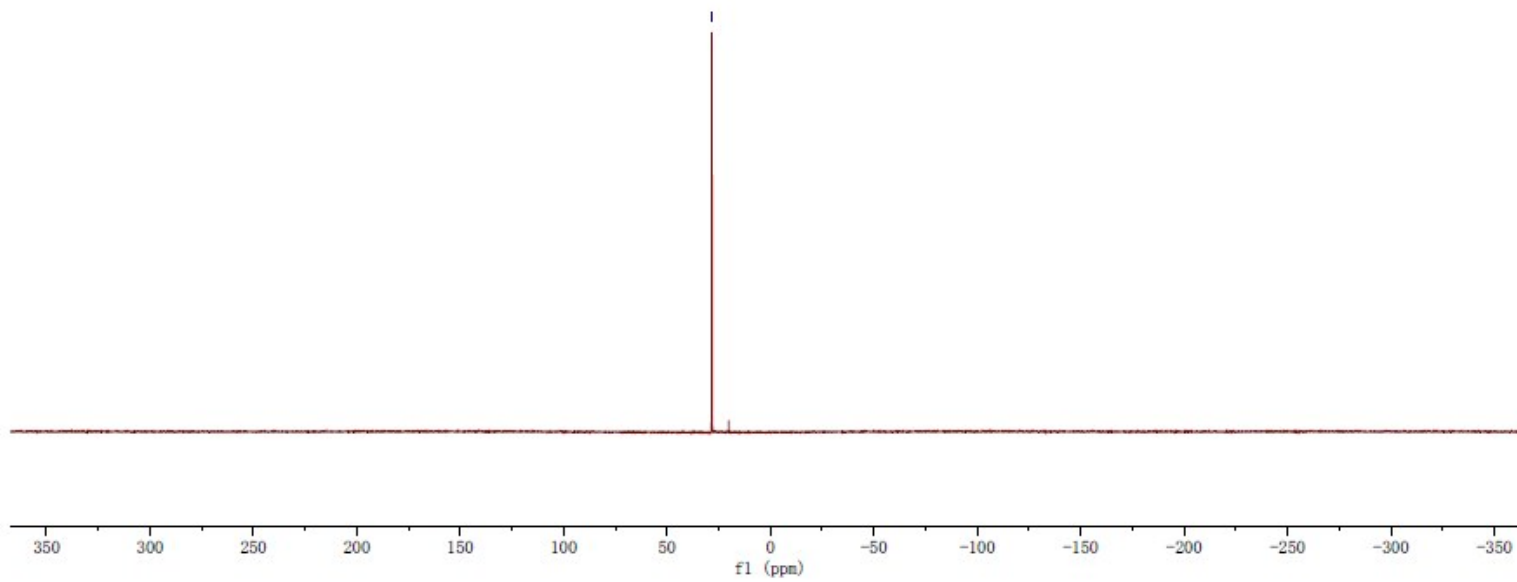

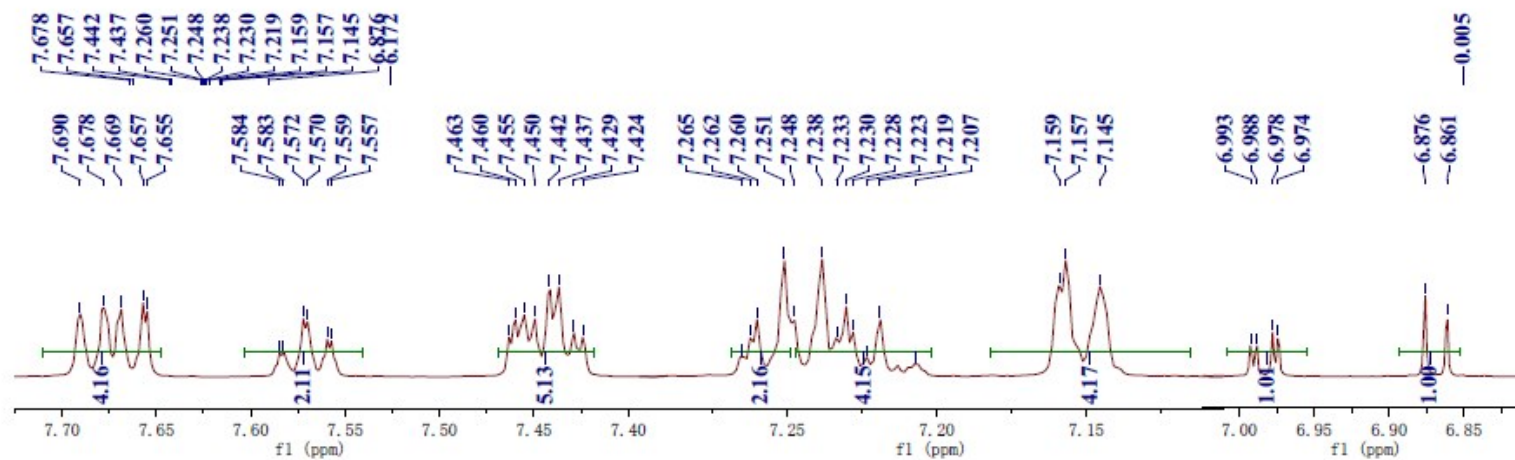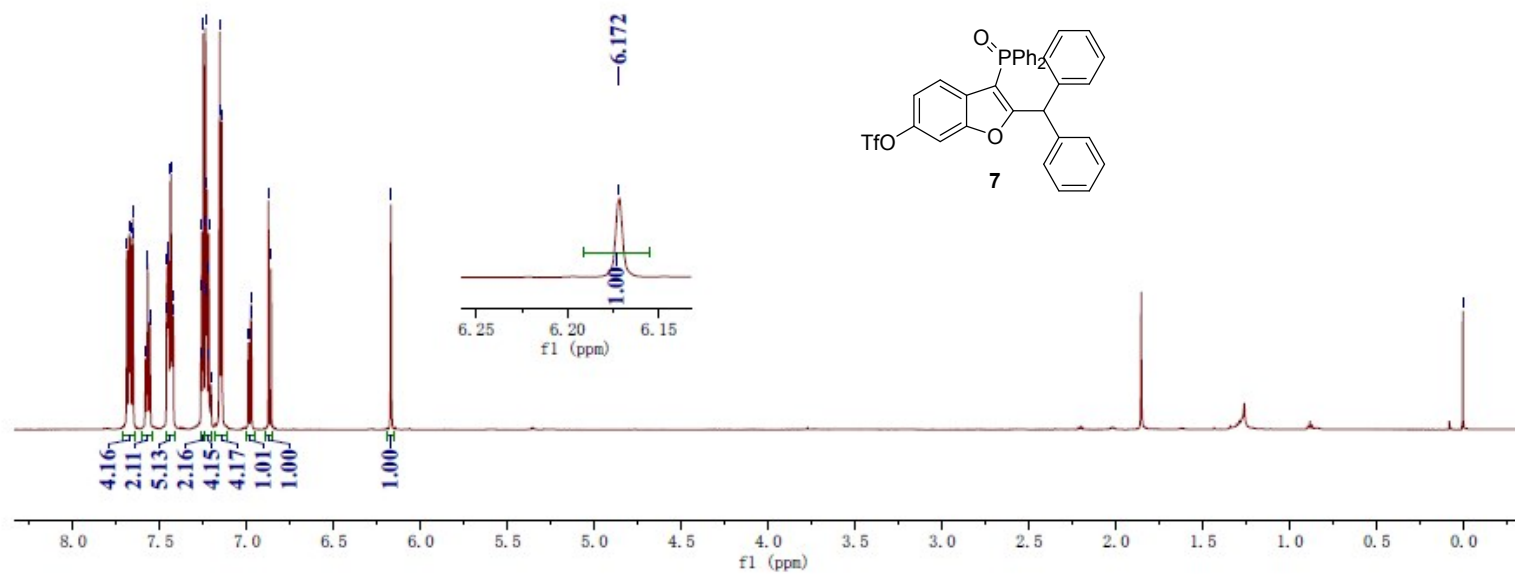

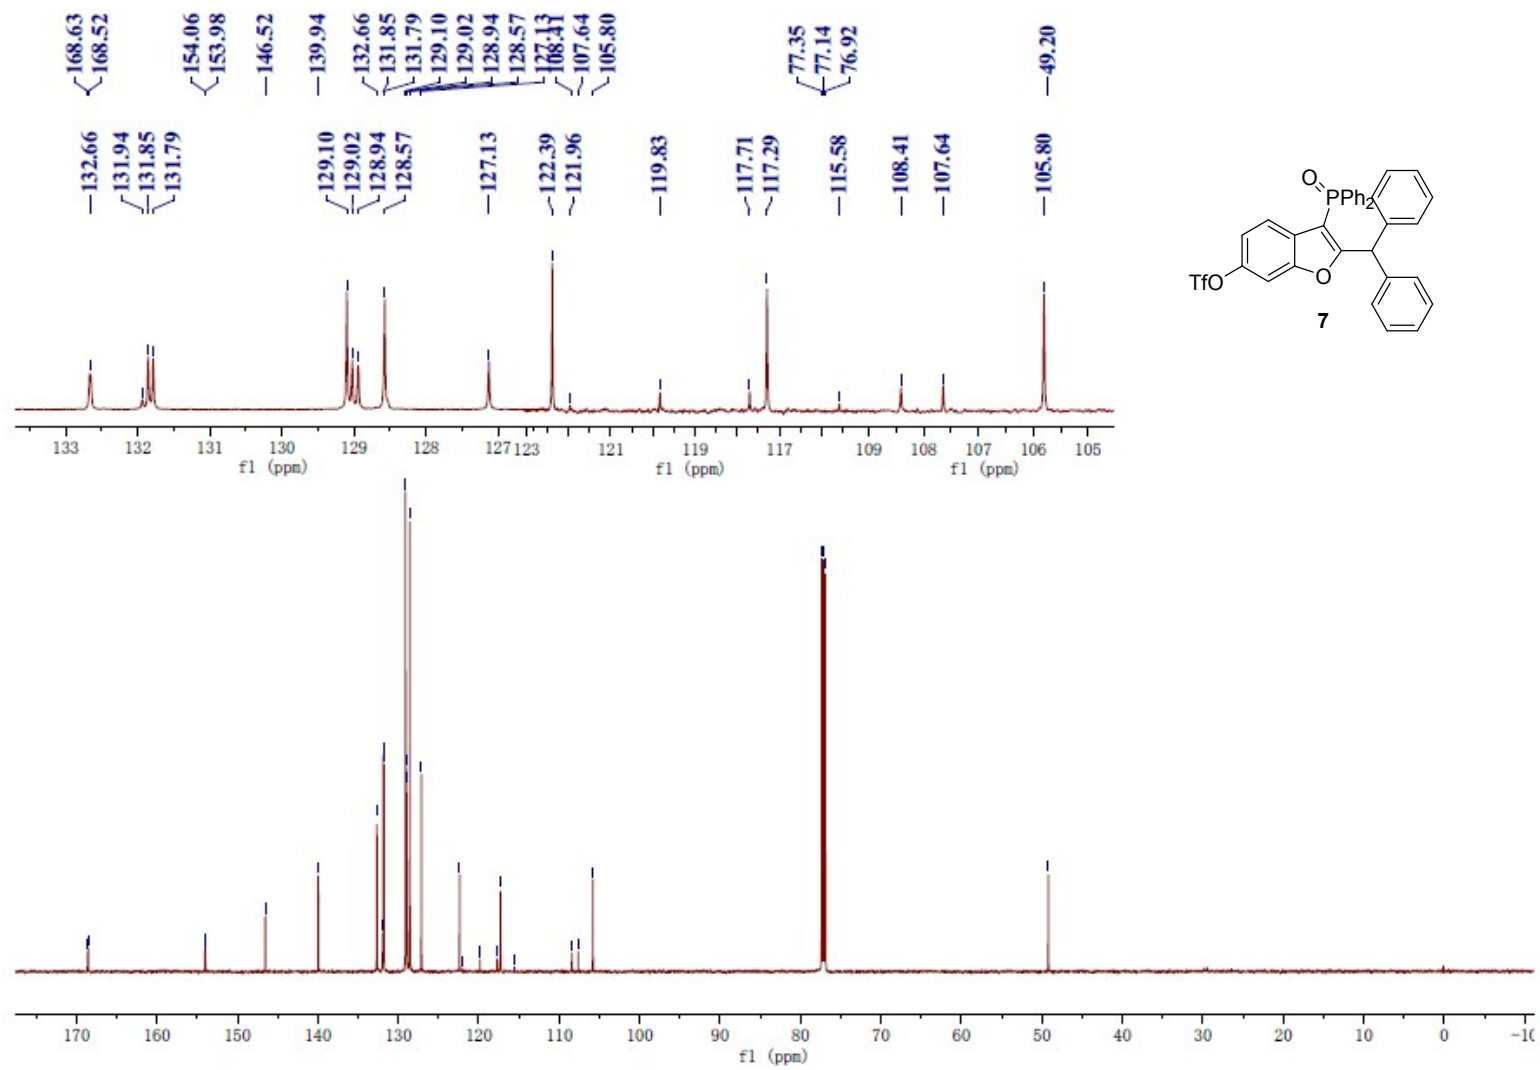



-21.36

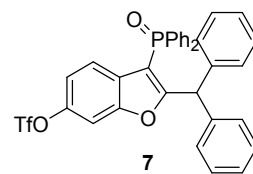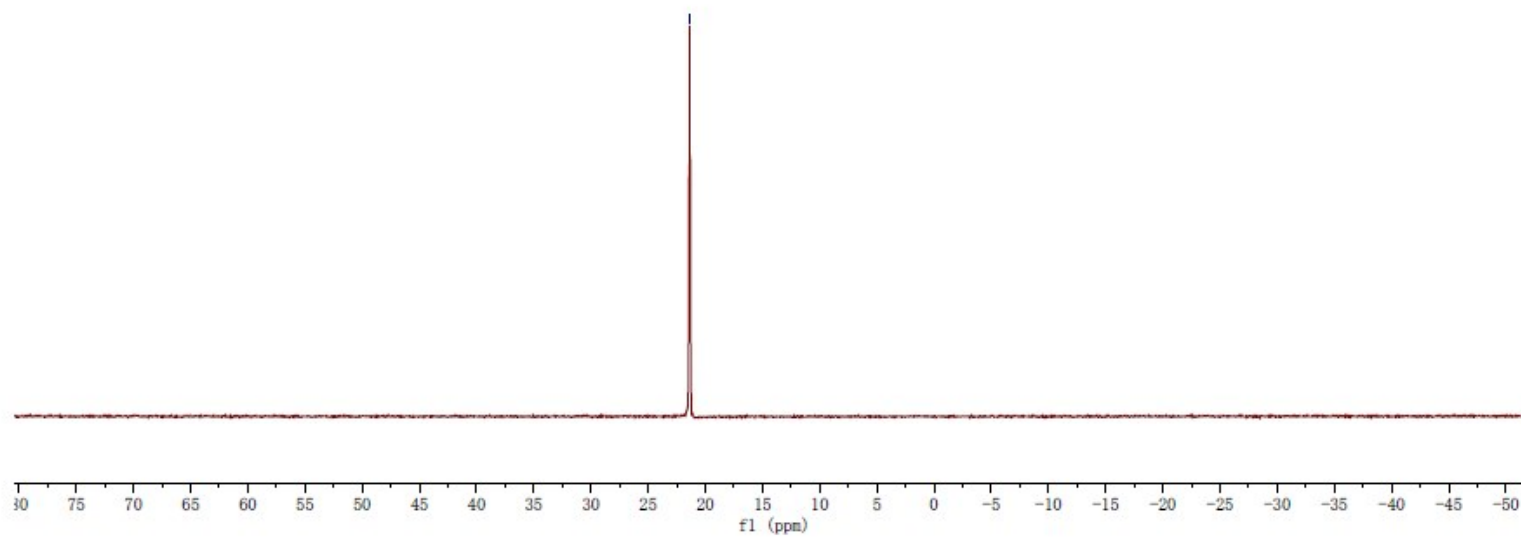

-72.60

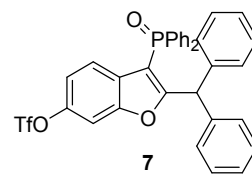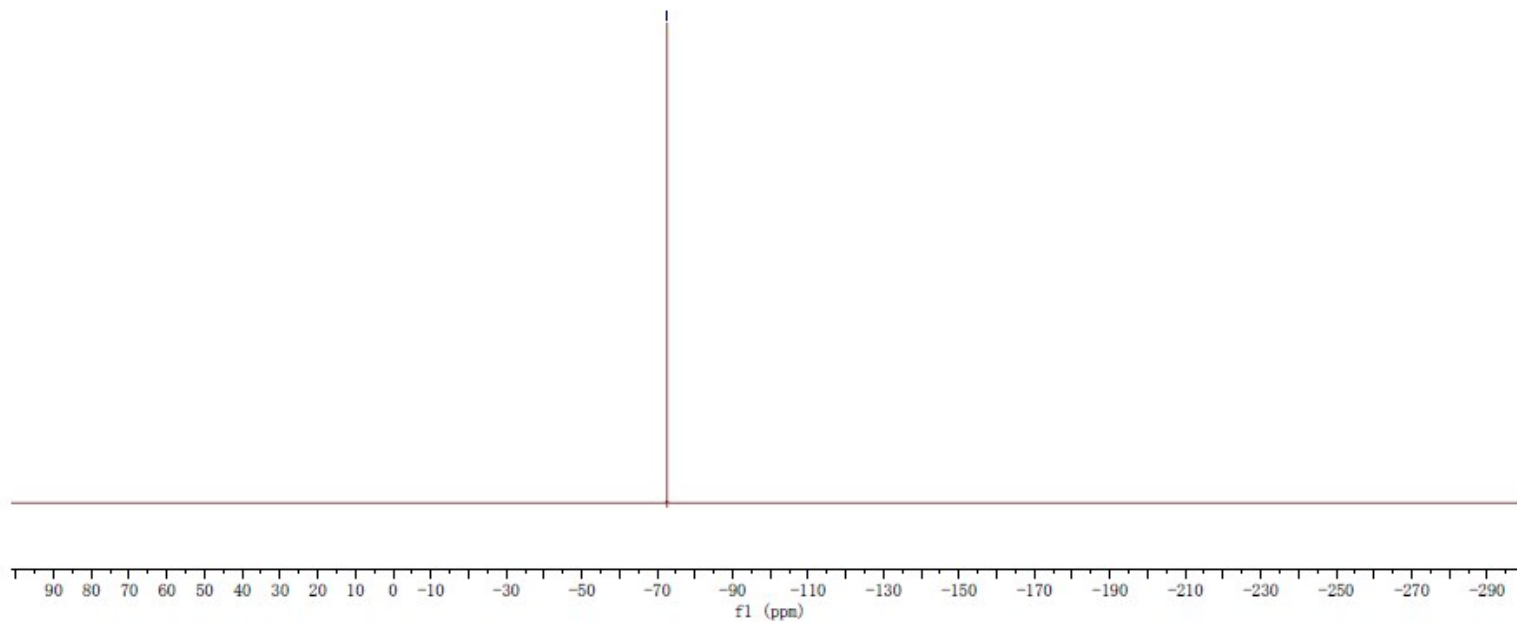

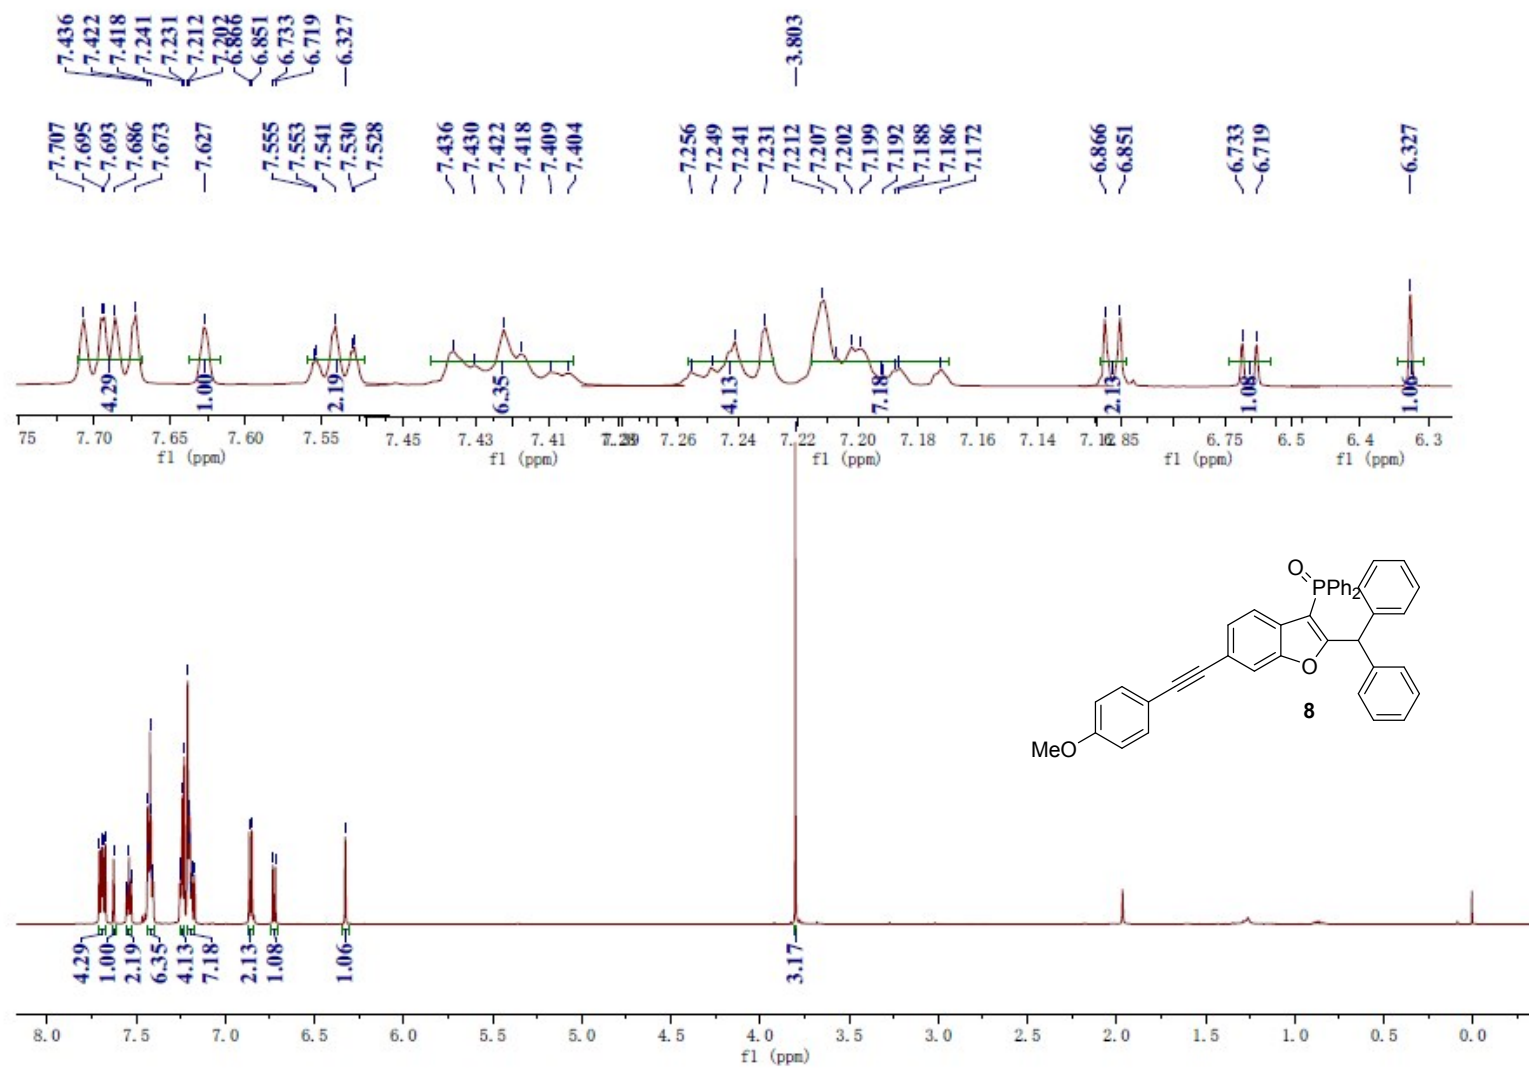

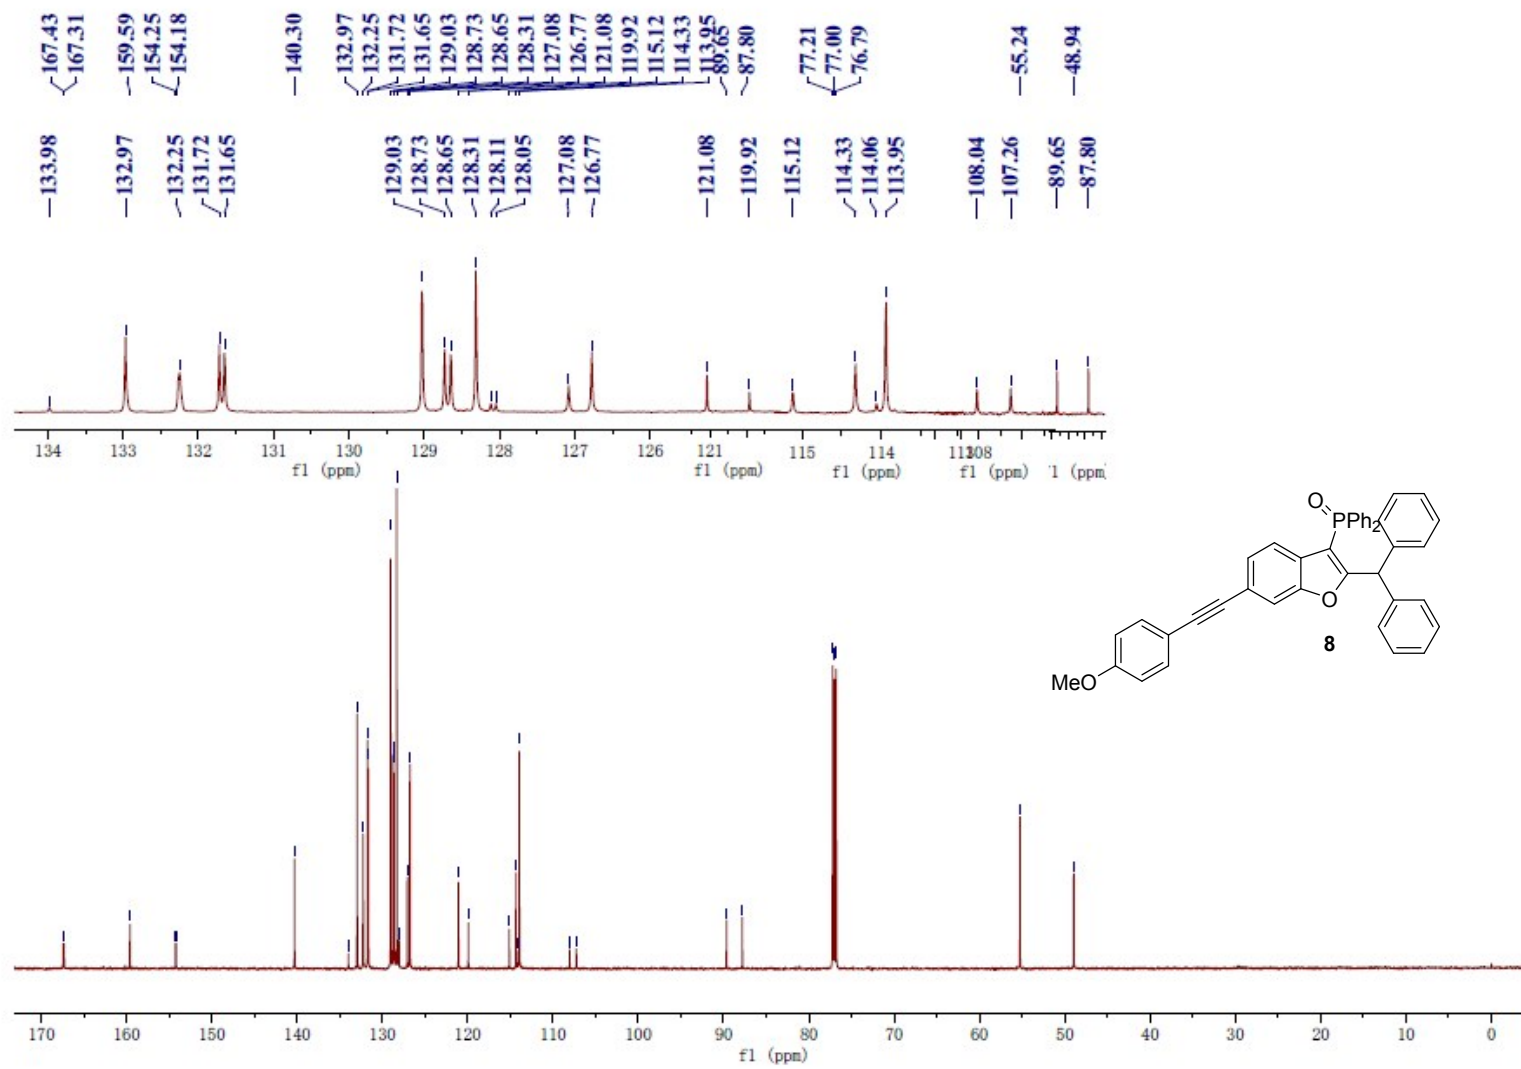

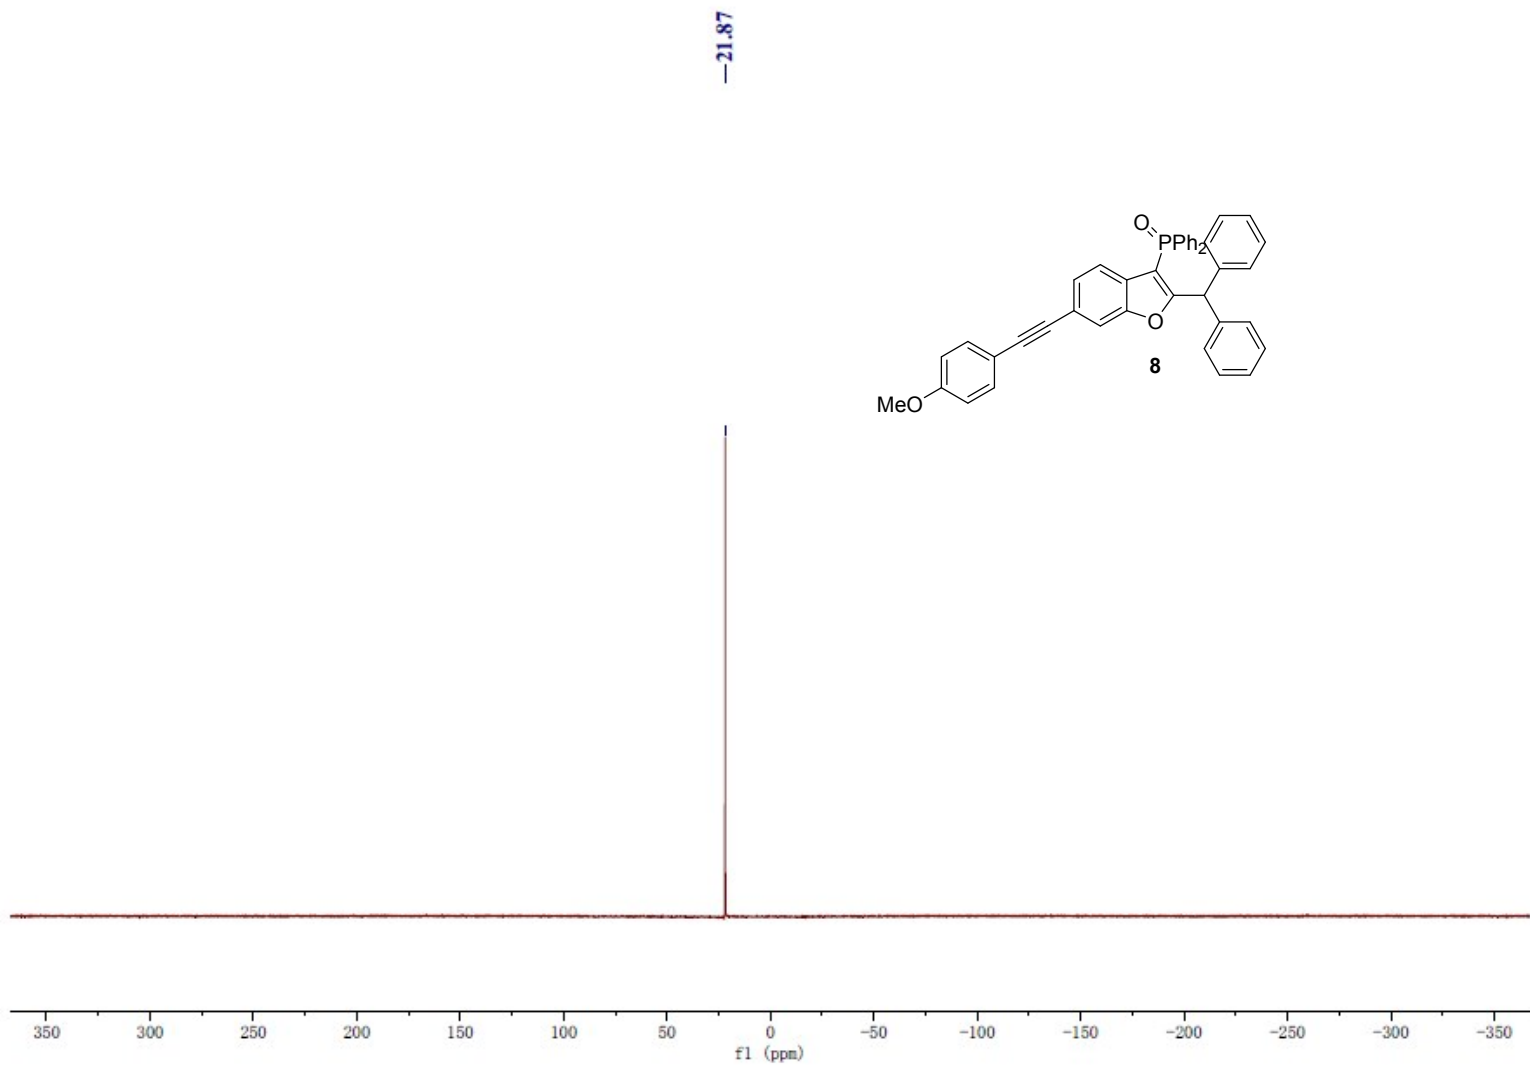

-21.87

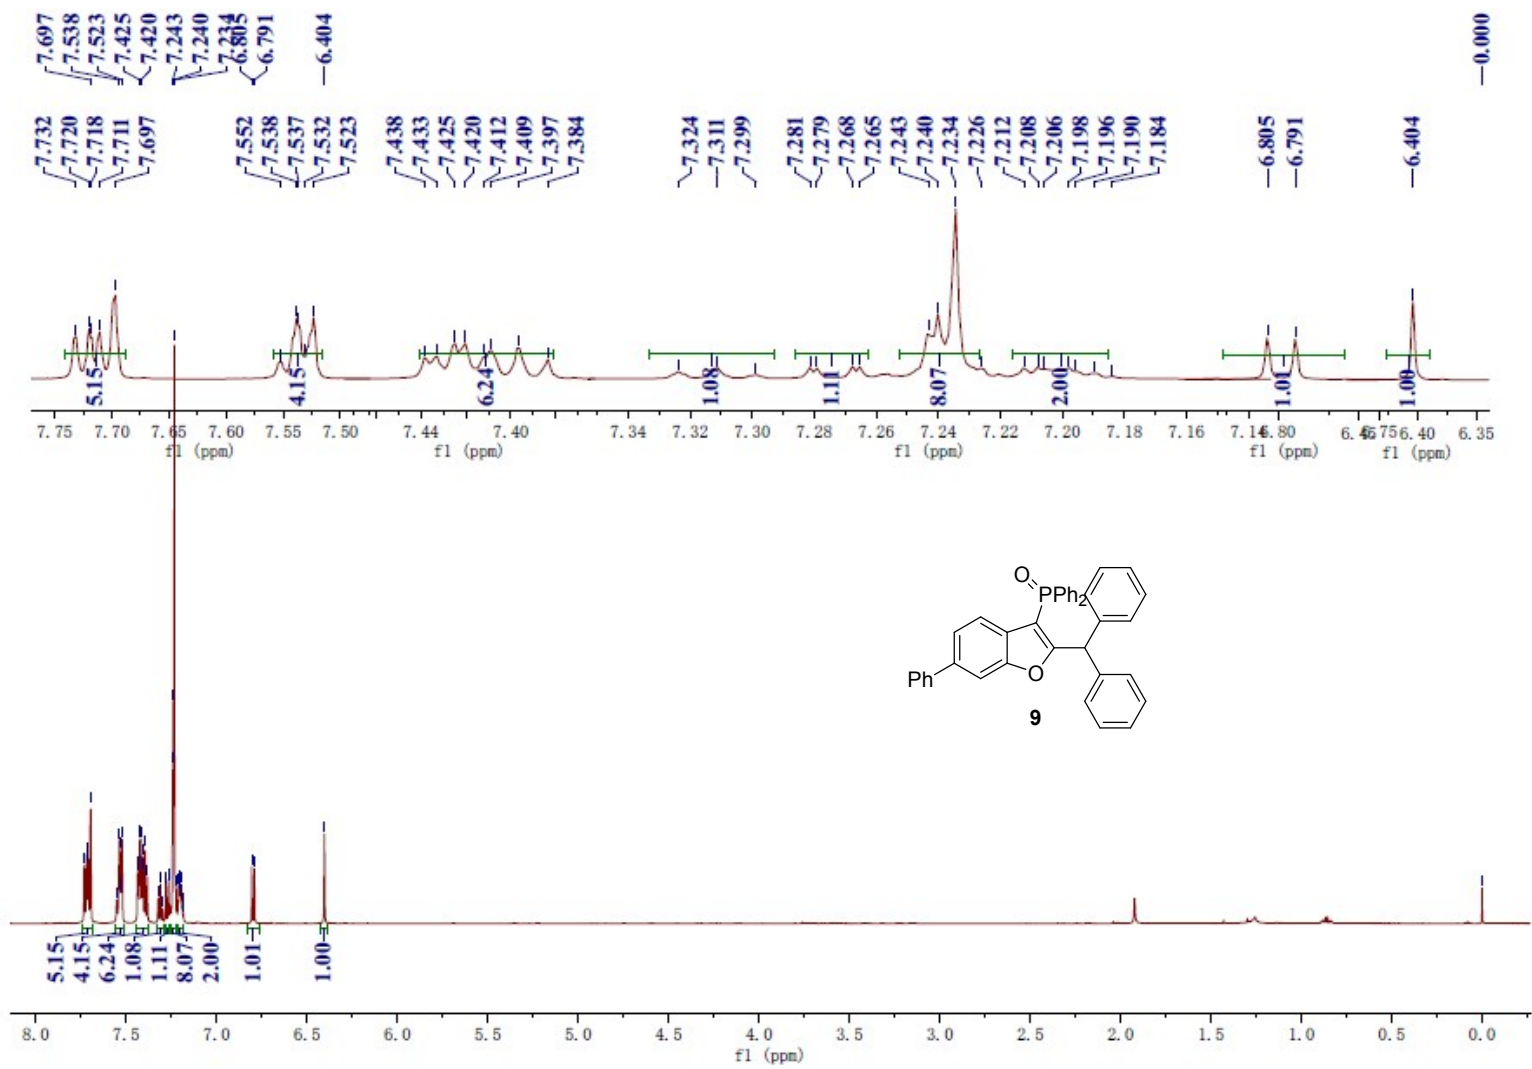

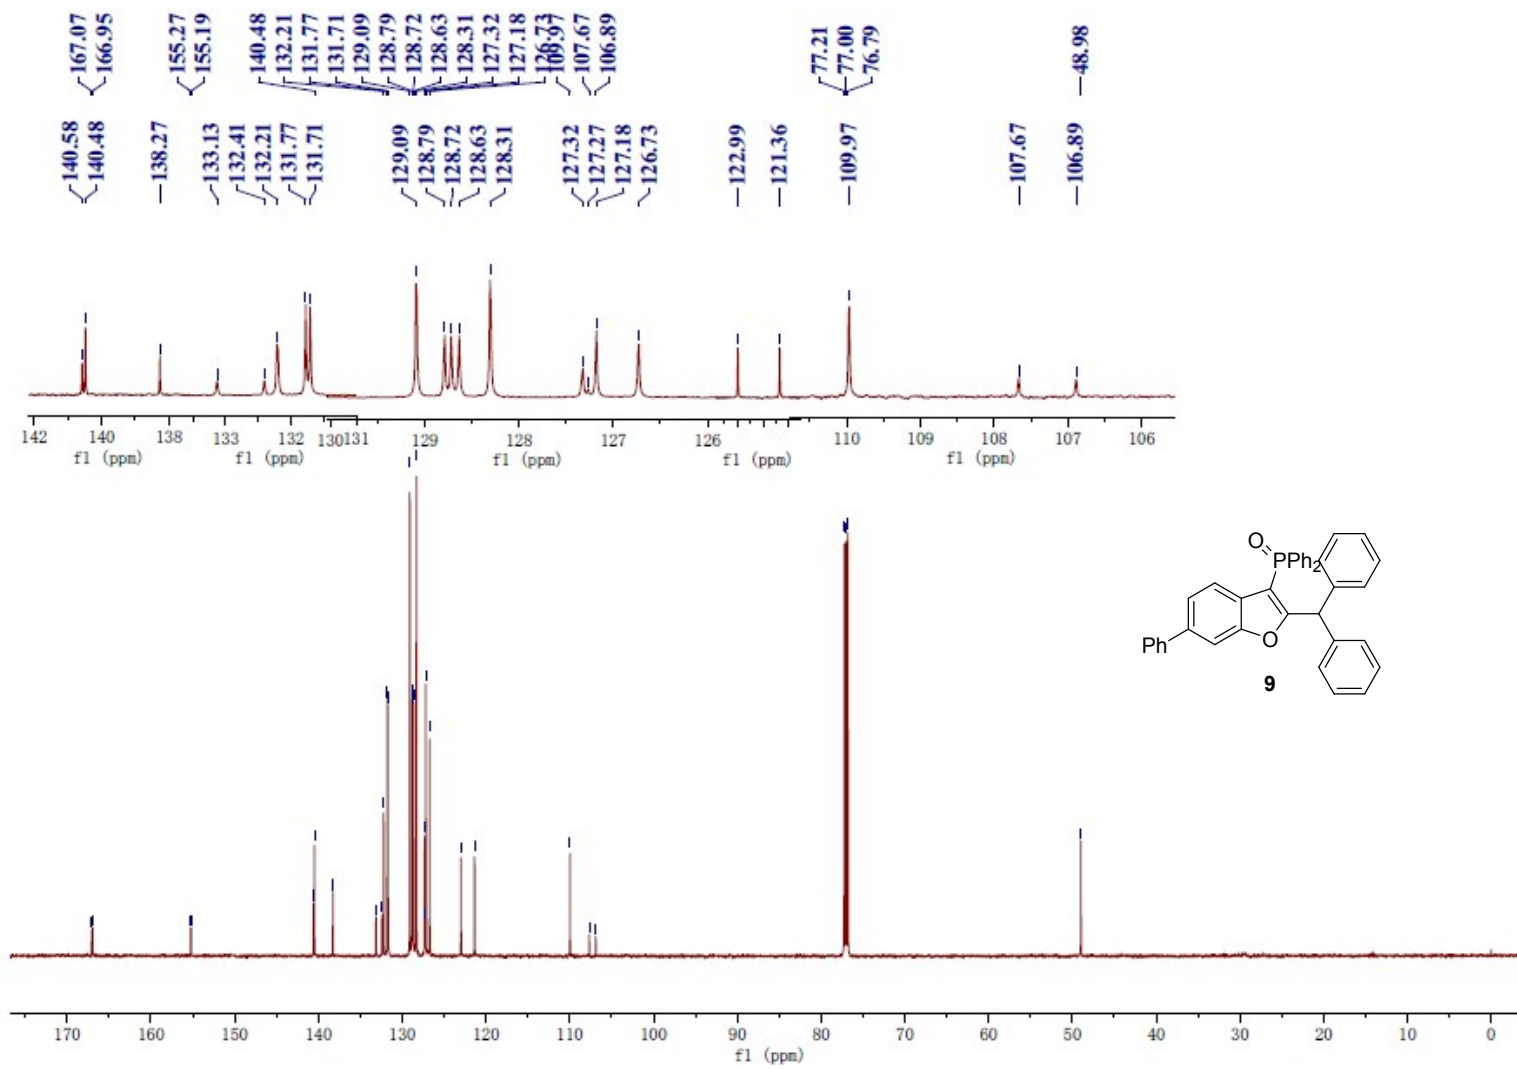

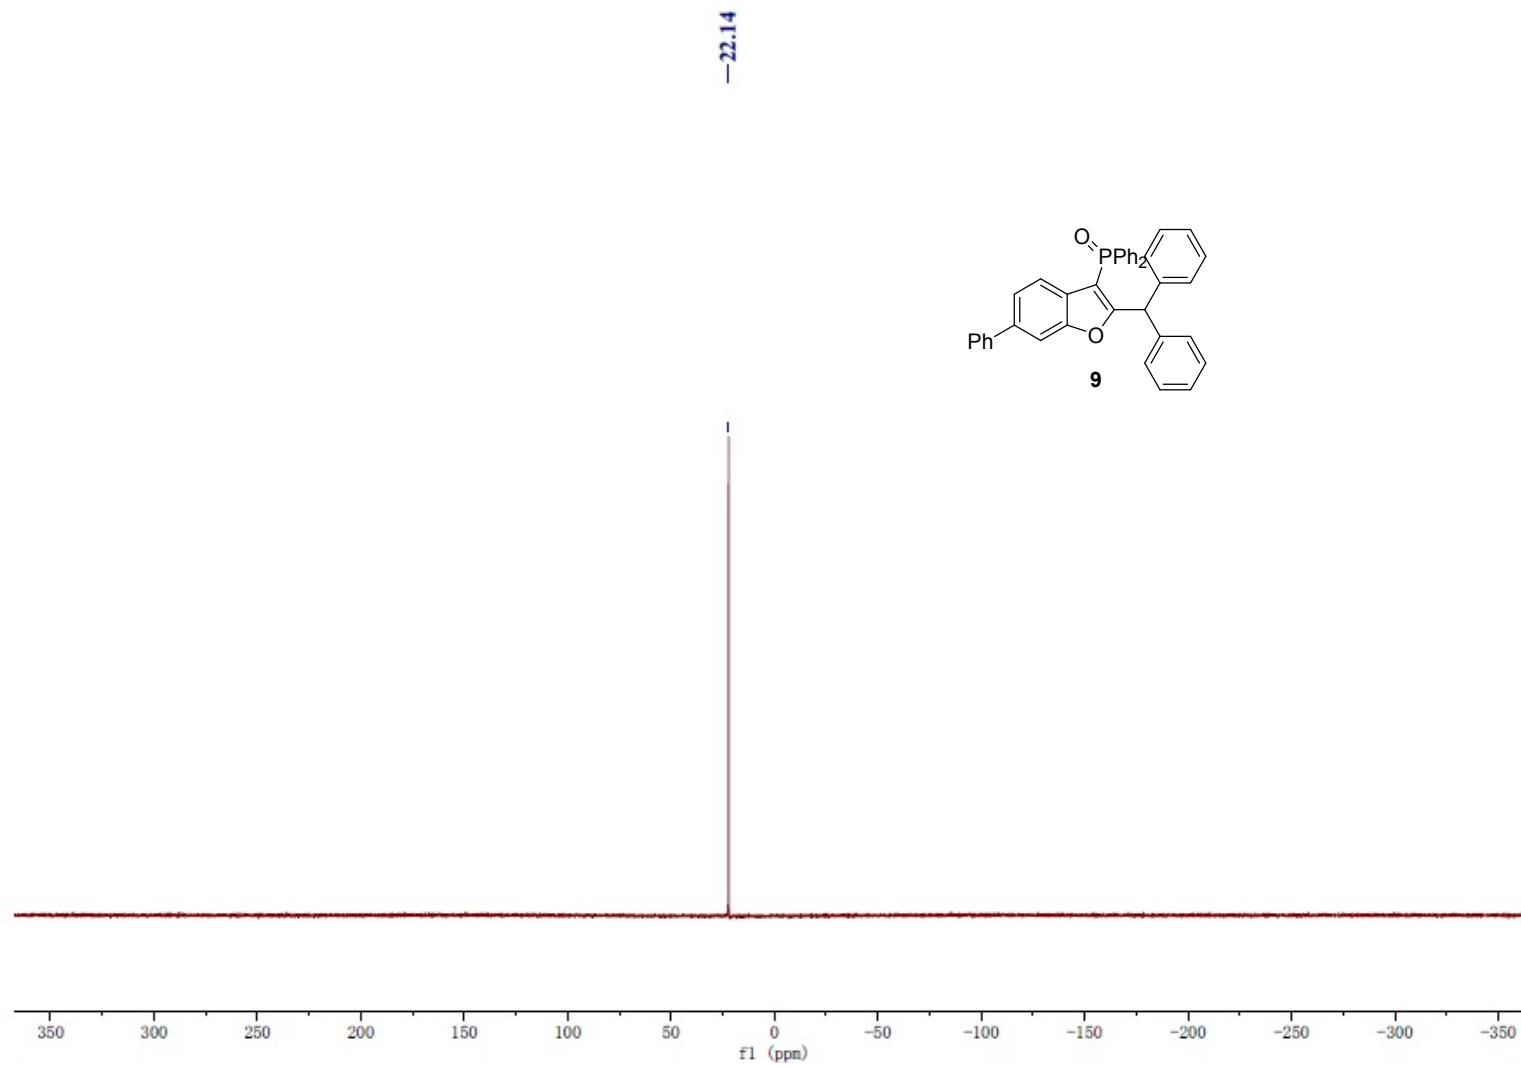



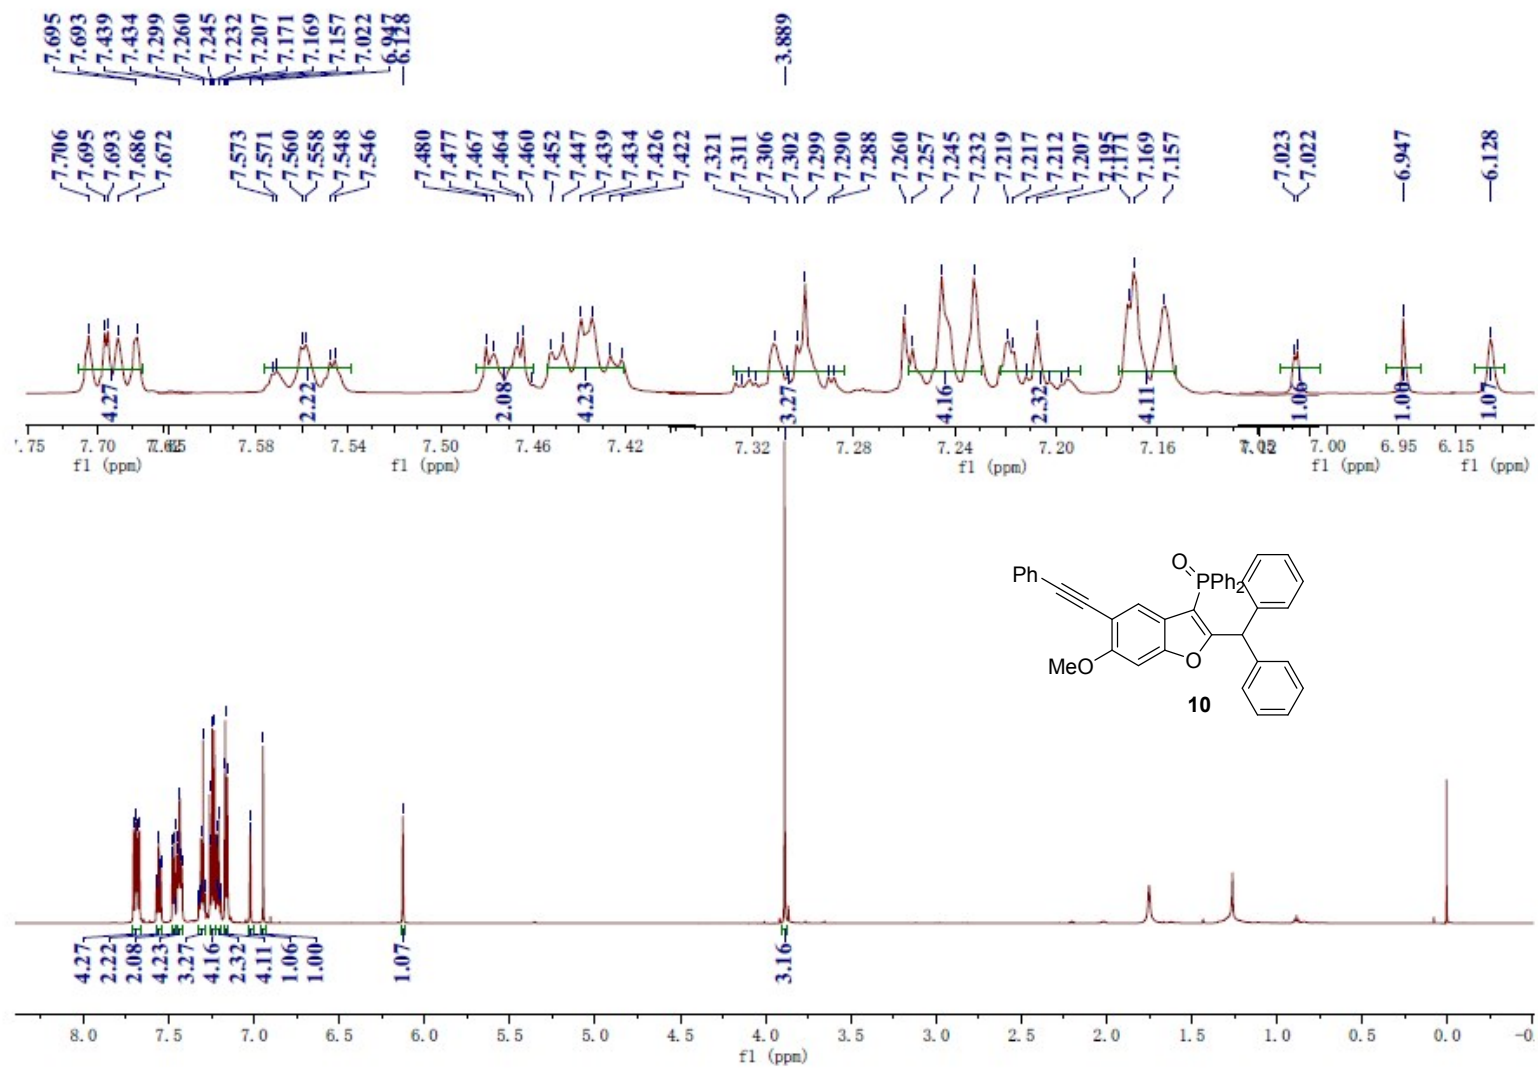

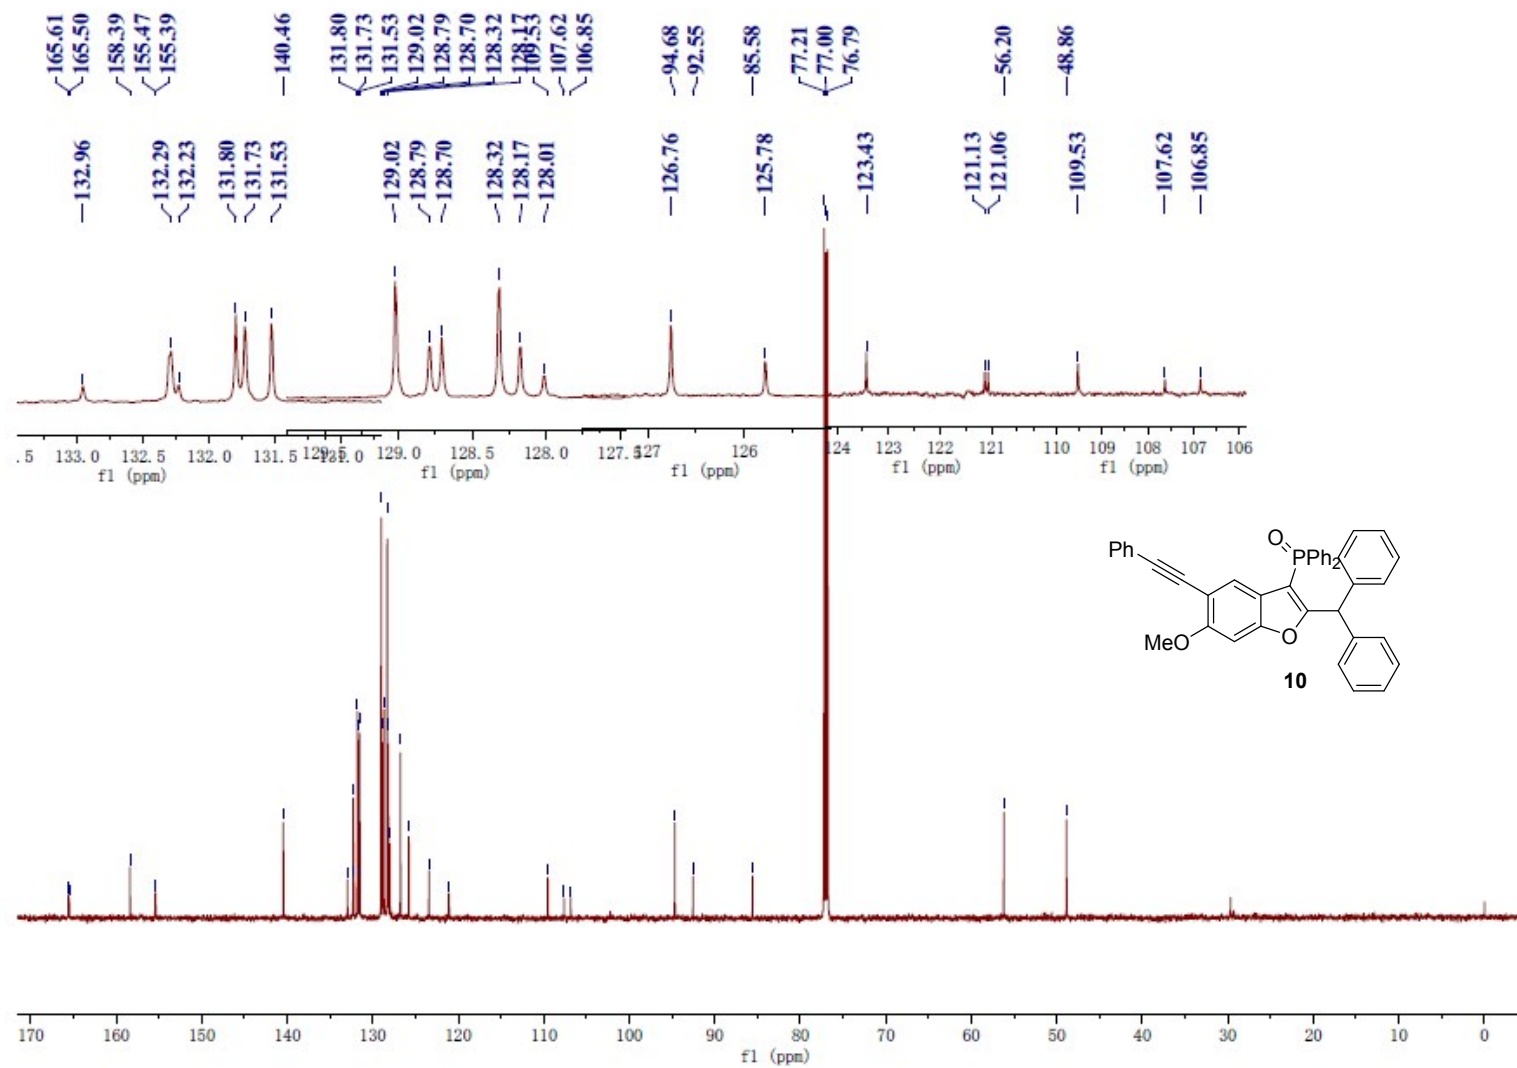

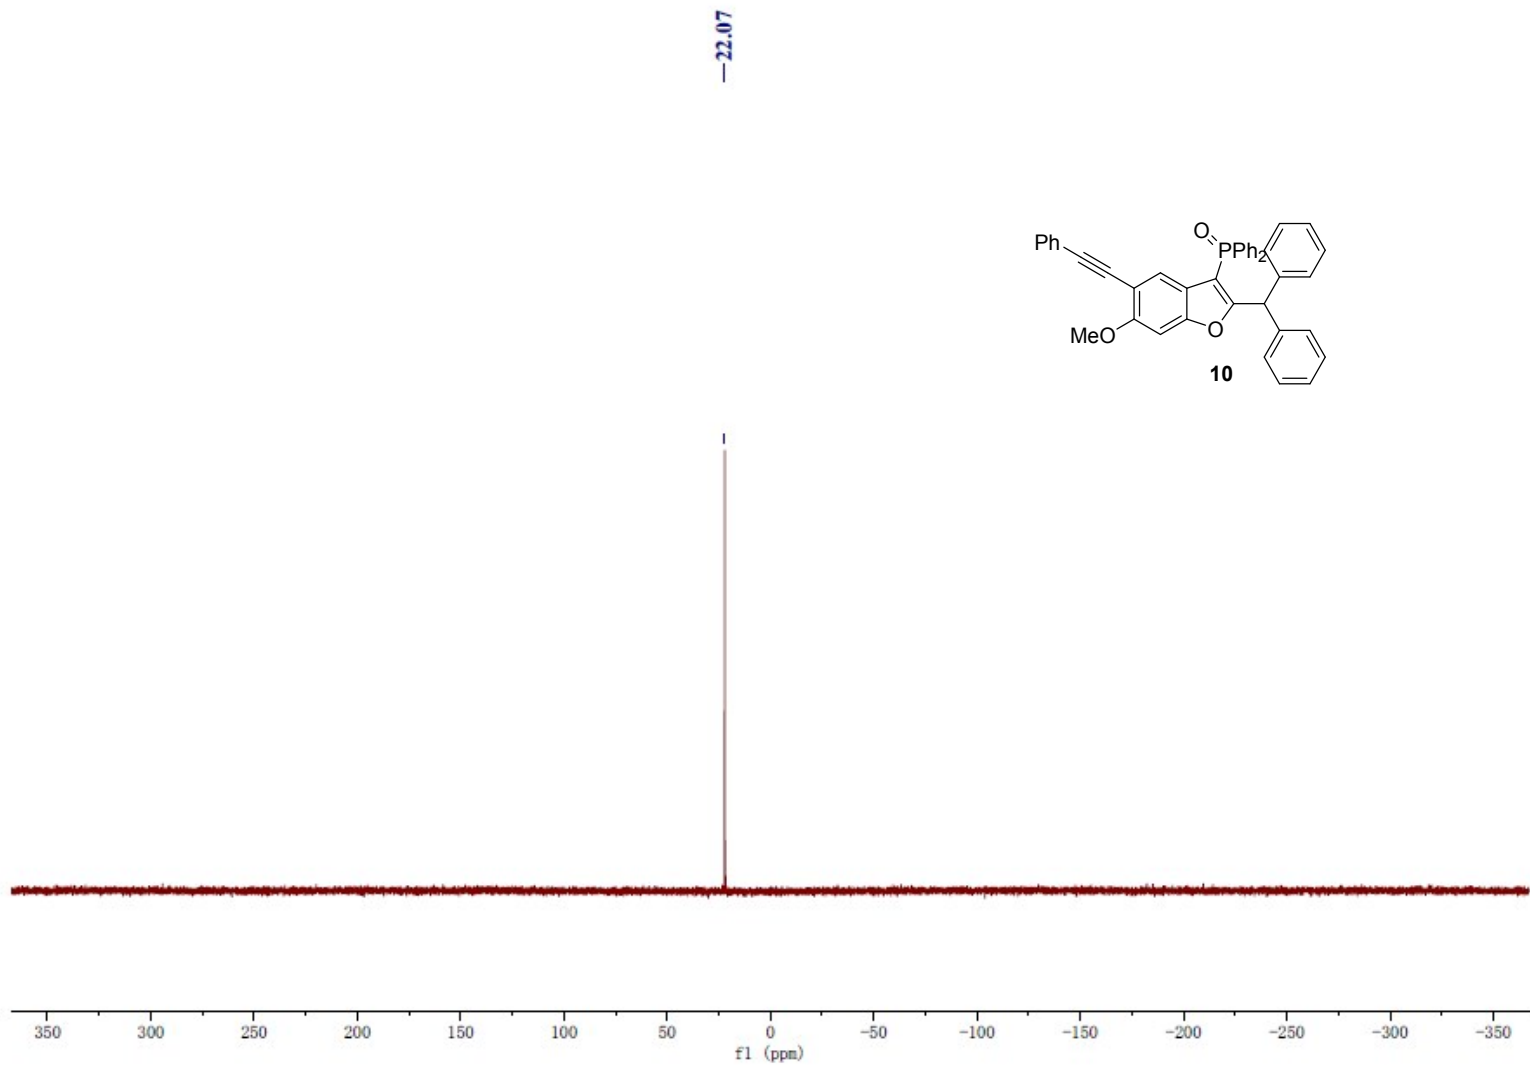

Supplement: d1qo00076d1.pdf [file d1qo00076d1.pdf]
